# Supplementary material for: Copper-catalyzed tandem oxidative cyclization of arylacetamides: efficient access to N-functionalized isatins
Source: Royal Society of Chemistry journal article supplement (doi:10.1039/c3ra40657a), 2013-01-01
Supplement: c3ra40657a.pdf [file c3ra40657a.pdf]

# Copper-Catalyzed Tandem Oxidative Cyclization of Arylacetamides: Efficient Access to *N*-Functionalized Isatins

Jie Sun<sup>a</sup>, Bingxin Liu<sup>a</sup>, and Bin Xu<sup>\*.a,b</sup>

<sup>a</sup> Department of Chemistry, College of Sciences, Shanghai University, Shanghai 200444, China

<sup>b</sup> State Key Laboratory of Organometallic Chemistry, Shanghai Institute of Organic Chemistry, Chinese Academy of Sciences, Shanghai 200032, China

Tel: (+86) 21-66132830; Fax: (+86) 21-66134594; E-mail: xubin@shu.edu.cn

## Supporting Information

### CONTENTS:

|                                                                                          |     |
|------------------------------------------------------------------------------------------|-----|
| 1. General information.....                                                              | S2  |
| 2. Screening of the reaction conditions (Tables S1) .....                                | S3  |
| 3. Synthesis and characterization for substrates.....                                    | S4  |
| 4. General procedure for the Cu-catalyzed <i>N</i> -alkyl isatin synthesis.....          | S13 |
| 5. Synthesis and characterization for <i>N</i> -alkyl substituted isatins products ..... | S14 |
| 6. General procedure for the Cu-catalyzed <i>N</i> -aryl isatins synthesis .....         | S18 |
| 7. Synthesis and characterization for <i>N</i> -aryl substituted isatins products.....   | S19 |
| 8. Mechanistic studies.....                                                              | S23 |
| 9. Copies of <sup>1</sup> H and <sup>13</sup> C NMR spectra for all compounds.....       | S26 |

## 1. General Information

All reagents and metal catalysts were obtained from commercial sources without further purification, and commercially available solvents were purified before use. All new compounds were fully characterized. All melting points were taken on a WRS-1A or a WRS-1B Digital Melting Point Apparatus without correction. Infrared spectra were obtained using an AVATAR 370 FT-IR spectrometer.  $^1\text{H}$  and  $^{13}\text{C}$  NMR spectra were recorded with a Bruker AV-500 spectrometer operating at 500 and 125 MHz, respectively, with chemical shift values being reported in ppm relative to chloroform ( $\delta = 7.26$  ppm), dimethyl sulfoxide ( $\delta = 2.50$  ppm) or TMS ( $\delta = 0.00$  ppm) for  $^1\text{H}$  NMR, and chloroform ( $\delta = 77.16$  ppm) or dimethyl sulfoxide ( $\delta = 39.52$  ppm) for  $^{13}\text{C}$  NMR. Mass spectra and high resolution mass spectra were recorded with an Agilent 5975N using an Electron impact (EI) or Electrospray ionization (ESI) techniques. Elemental analyses were carried out on an Elementar Vario EL elemental analyzer. Silica gel plate GF254 were used for thin layer chromatography (TLC) and silica gel H or 300-400 mesh were used for flash column chromatography. Yields refer to chromatographically and spectroscopically pure compounds, unless otherwise indicated.

## 2. Screening of the Reaction Conditions

**Table S1.** Condition Optimizations of Isatin Synthesis<sup>a</sup>

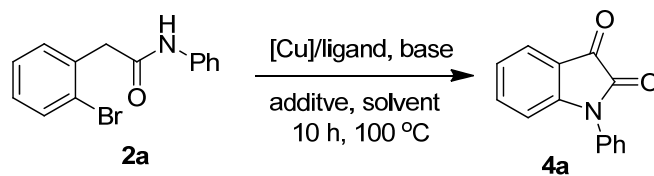

| Entry    | Cu source  | Base                            | Solvent            | Additive             | Ligand           | Yield <sup>b</sup> (%) |
|----------|------------|---------------------------------|--------------------|----------------------|------------------|------------------------|
| 1        | CuI        | Pyridine                        | dioxane            | TBAB                 | 1,10-Phen        | <5                     |
| 2        | CuI        | Et <sub>3</sub> N               | dioxane            | TBAB                 | 1,10-Phen        | <5                     |
| 3        | CuI        | NaOH                            | dioxane            | TBAB                 | 1,10-Phen        | <5                     |
| 4        | CuI        | Na <sub>2</sub> CO <sub>3</sub> | dioxane            | TBAB                 | 1,10-Phen        | 26                     |
| 5        | CuI        | K <sub>2</sub> CO <sub>3</sub>  | dioxane            | TBAB                 | 1,10-Phen        | 29                     |
| 6        | CuI        | NaOAc                           | dioxane            | TBAB                 | 1,10-Phen        | 34                     |
| <b>7</b> | <b>CuI</b> | <b>KOAc</b>                     | <b>dioxane</b>     | <b>TBAB</b>          | <b>1,10-Phen</b> | <b>75</b>              |
| 8        | CuI        | KOAc                            | CH <sub>3</sub> CN | TBAB                 | 1,10-Phen        | <5                     |
| 9        | CuI        | KOAc                            | NMP                | TBAB                 | 1,10-Phen        | <5                     |
| 10       | CuI        | KOAc                            | DMF                | TBAB                 | 1,10-Phen        | 18                     |
| 11       | CuI        | KOAc                            | toluene            | TBAB                 | 1,10-Phen        | 52                     |
| 12       | CuI        | KOAc                            | dioxane            | TBAB                 | Bipyridine       | 34                     |
| 13       | CuBr       | KOAc                            | dioxane            | TBAB                 | 1,10-Phen        | 53                     |
| 14       | CuCl       | KOAc                            | dioxane            | TBAB                 | 1,10-Phen        | 58                     |
| 15       | CuI        | KOAc                            | dioxane            | Bu <sub>4</sub> NOAc | 1,10-Phen        | 47                     |
| 16       | CuI        | KOAc                            | dioxane            | Bn <sub>3</sub> NCl  | 1,10-Phen        | 37                     |
| 17       | CuI        | KOAc                            | dioxane            | Bu <sub>4</sub> NF   | 1,10-Phen        | 42                     |

<sup>a</sup> Reaction conditions: **2a** (0.25 mmol), [Cu] (10 mol %), ligand (20 mol %), base (3.0 equiv), additive (1.4 equiv) in solvent (1 mL) for 10 h at 100 °C, open to air, dried through a calcium chloride tube. NMP = *N*-Methyl-2-pyrrolidone, 1,10-Phen = 1,10-Phenanthroline, TBAB = Tetra-*n*-butylammonium bromide. <sup>b</sup> Isolated yields.

### 3. Synthesis and Characterization for Substrates

Two methods were used for the synthesis of start materials using **Method A** and **Method B**.

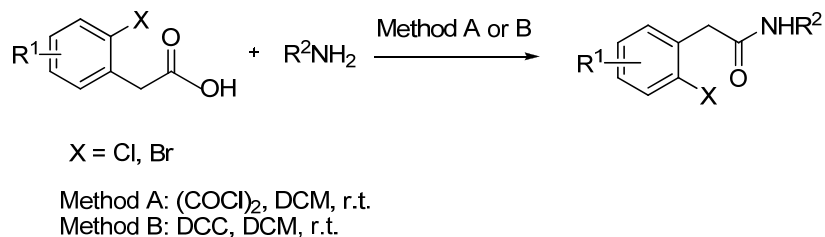

#### Method A:

To a solution of the corresponding substituted (2-halogenphenyl)acetic acid (1.0 equiv) in CH<sub>2</sub>Cl<sub>2</sub> (0.3 M) was added (COCl)<sub>2</sub> (1.27 equiv) slowly at 0 °C, and then the reaction mixture was stirred at room temperature for 2h, after that CH<sub>2</sub>Cl<sub>2</sub> was removed under diminished pressure. The resulting residue was dissolved in CH<sub>2</sub>Cl<sub>2</sub> (0.5 M) and was slowly added to a solution of corresponding amine (2.0 equiv) in CH<sub>2</sub>Cl<sub>2</sub> chilled to 0 °C. The reaction mixture was stirred at room temperature until TLC revealed the disappearance of the starting material, then the mixture was filtered through a thin pad of celite. The filtrate was washed with water, 1 N HCl and 5% sodium bicarbonate solution and brine. The organic layer was dried over Na<sub>2</sub>SO<sub>4</sub>, and concentrated in vacuo. The crude product was purified by recrystallization from EtOAc/ petroleum ether.

#### Method B:

To a solution of the corresponding substituted (2-halogenphenyl)acetic acid (1.0 equiv) and dicyclohexylcarbodiimide (DCC) (1.2 equiv) in CH<sub>2</sub>Cl<sub>2</sub> (0.3 M) was added amine (1.2 equiv) at room temperature. After the reaction was finished (monitored by TLC), the mixture was filtered through a thin pad of celite and the filtrate was concentrated in vacuo. The crude product was purified by flash chromatography employing mixtures of EtOAc/ petroleum ether as eluents.

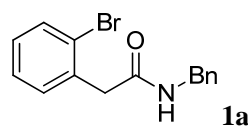

**N-benzyl-2-(2-bromophenyl)acetamide (1a)**<sup>1</sup>: Following the same procedure as Method A with (2-bromophenyl)acetic acid (2.00 g, 9.3 mmol), (COCl)<sub>2</sub> (1.12 mL, 11.80 mmol) and benzylamine (1.99 g, 18.6 mmol). The crude product was recrystallized from EtOAc/ petroleum ether to give **1a** as a white solid (2.21 g, 78%). M.p. 132-133 °C; IR (KBr, cm<sup>-1</sup>): 3276, 3064, 3029, 1643, 1547, 1471, 1453, 1412, 1365, 1338, 1244, 1069, 1027, 735, 693; <sup>1</sup>H NMR (CDCl<sub>3</sub>, 500 MHz): δ 7.61 (dd, *J* = 8.0, 1.0 Hz, 1H), 7.40-7.24 (m, 7H), 7.18 (td, *J* = 8.0, 1.5 Hz, 1H), 5.83 (br, 1H), 4.46 (d, *J* = 6.0 Hz, 2H), 3.79 (s, 2H); <sup>13</sup>C NMR (CDCl<sub>3</sub>, 125 MHz): δ 169.5, 138.0, 134.8, 133.2, 131.8, 129.2, 128.7, 128.1, 127.6, 127.5, 125.0, 44.1, 43.7; MS (EI) *m/z* (%): 305(4) [M<sup>+</sup> (<sup>81</sup>Br)], 303(4) [M<sup>+</sup> (<sup>79</sup>Br)], 224(34), 134(3), 91(100), 84(2).

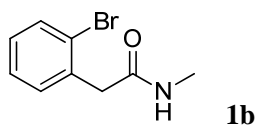

**2-(2-bromophenyl)-N-methylacetamide (1b)**<sup>2</sup>: Following the same procedure as Method A with (2-bromophenyl)acetic acid (2.00 g, 9.3 mmol), (COCl)<sub>2</sub> (1.12 mL, 11.80 mmol), methylamine hydrochloride (1.25 g, 18.6 mmol) and triethylamine (1.88 g, 18.6 mmol). The crude product was recrystallized from EtOAc/ petroleum ether to give **1b** as a colorless solid (1.61 g, 76%). M.p. 101-102 °C; IR (KBr, cm<sup>-1</sup>): 3292, 1648, 1556, 1470, 1251, 1027, 738; <sup>1</sup>H NMR (CDCl<sub>3</sub>, 500 MHz): δ 7.58 (d, *J* = 8 Hz, 1H), 7.35-7.28 (m, 2H), 7.17-7.14 (m, 1H), 5.49 (br, 1H), 3.70 (s, 2H), 2.43 (d, *J* = 5.5 Hz, 3H); <sup>13</sup>C NMR (CDCl<sub>3</sub>, 125 MHz): δ 170.2, 134.9, 133.2, 131.8, 129.2, 128.0, 125.0, 43.9, 26.6; LC-MS (ESI) *m/z*: 230 [M<sup>+</sup>H (<sup>81</sup>Br)], 228 [M<sup>+</sup>H (<sup>79</sup>Br)].

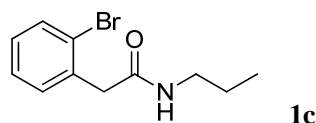

**2-(2-bromophenyl)-N-propylacetamide (1c)**<sup>3</sup>: Following the same procedure as Method A with (2-bromophenyl)acetic acid (2.00 g, 9.3 mmol), (COCl)<sub>2</sub> (1.12 mL, 11.80 mmol), propyl amine (1.09 g, 18.6 mmol). The crude product was recrystallized from EtOAc/ petroleum ether to give **1c** as a white solid (1.42 g, 60%). M.p. 92-93 °C; IR (KBr, cm<sup>-1</sup>): 3296, 3080, 2962, 2932, 2873, 1646, 1550, 1470, 1438, 1412, 1341, 1248, 1152, 1028, 736; <sup>1</sup>H NMR (CDCl<sub>3</sub>, 500 MHz): δ 7.59 (d, *J* = 8.0 Hz, 1H), 7.36-7.29 (m, 2H), 7.16 (td, *J* = 8.0, 1.5 Hz, 1H), 5.45 (br, 1H), 3.18 (q, *J* = 6.5 Hz, 2H), 1.50-1.43 (m, 2H), 0.85 (t, *J* = 7.4 Hz, 3H); <sup>13</sup>C NMR (CDCl<sub>3</sub>, 125 MHz): δ 169.4, 135.1, 133.1, 131.7, 129.1, 128.0, 125.0, 44.1, 41.4, 22.7, 11.3; LC-MS (ESI) *m/z*: 258 [M<sup>+</sup>H (<sup>81</sup>Br)], 256 [M<sup>+</sup>H (<sup>79</sup>Br)].

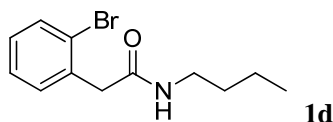

**2-(2-bromophenyl)-N-butylacetamide (1d)**<sup>4</sup>: Following the same procedure as Method A with (2-bromophenyl)acetic acid (2.00 g, 9.3 mmol), (COCl)<sub>2</sub> (1.12 mL, 11.80 mmol), butylamine (1.32 g, 18.6 mmol). The crude product was recrystallized from EtOAc/ petroleum ether to give **1d** as a white solid (1.99 g, 80%). M.p. 80-81°C; IR (KBr, cm<sup>-1</sup>): 3299, 2955, 1645, 1548, 1242, 1028, 1090, 738; <sup>1</sup>H NMR (CDCl<sub>3</sub>, 500 MHz): δ 7.58 (d, *J* = 8.0 Hz, 1H), 7.35-7.29 (m, 2H), 7.17-7.14 (m, 1H), 5.45 (br, 1H), 3.69 (s, 2H), 3.21 (q, *J* = 6.5 Hz, 2H), 1.45-1.39 (m, 2H), 1.31-1.23 (m, 2H), 0.87 (t, *J* = 7.5 Hz, 3H); <sup>13</sup>C NMR (CDCl<sub>3</sub>, 125 MHz): δ 169.6, 135.3, 133.3, 131.9, 129.3, 128.2, 125.2, 44.3, 39.7, 31.7, 20.2, 13.9; LC-MS (ESI) *m/z*: 271 [M<sup>+</sup>H (<sup>81</sup>Br)], 269 [M<sup>+</sup>H (<sup>79</sup>Br)].

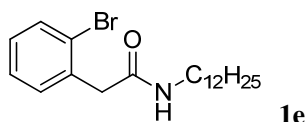

**2-(2-bromophenyl)-N-dodecylacetamide (1e)**: Following the same procedure as Method A with (2-bromophenyl)acetic acid (2.00 g, 9.3 mmol), (COCl)<sub>2</sub> (1.12 mL, 11.80 mmol), dodecan-1-amine (3.44 g, 18.6 mmol). The crude product was recrystallized from EtOAc/ petroleum ether to give **1e** as a white solid (2.58 g, 73%). M.p. 76-78 °C; IR (KBr, cm<sup>-1</sup>): 3299, 2962, 2918, 2849,

1649, 1557, 1242, 1027, 736;  $^1\text{H}$  NMR ( $\text{CDCl}_3$ , 500 MHz):  $\delta$  7.58 (d,  $J$  = 8.0 Hz, 1H), 7.36-7.29 (m, 2H), 7.16 (td,  $J$  = 8.0, 1.5 Hz, 1H), 5.42 (br, 1H), 3.70 (s, 2H), 3.21 (q,  $J$  = 6.5 Hz, 2H), 1.44-1.41 (m, 2H), 1.29-1.23 (m, 18H), 0.88 (t,  $J$  = 7.0 Hz, 3H);  $^{13}\text{C}$  NMR ( $\text{CDCl}_3$ , 125 MHz):  $\delta$  169.5, 135.2, 133.2, 131.8, 129.2, 128.1, 125.1, 44.2, 39.8, 32.0, 29.7, 29.6, 29.6, 29.5, 29.5, 29.3, 26.9, 22.8, 14.2; LC-MS (ESI)  $m/z$ : 384 [ $\text{M}^+\text{H}$  ( $^{81}\text{Br}$ )], 382 [ $\text{M}^+\text{H}$  ( $^{79}\text{Br}$ )]; HRMS:  $m/z$  calcd for  $\text{C}_{20}\text{H}_{33}\text{BrNO}$  [ $\text{M}^+\text{H}$ ] 382.1740; Found: 382.1756.

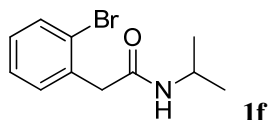

**2-(2-bromophenyl)-N-isopropylacetamide (1f)**<sup>3</sup>: Following the same procedure as Method A with (2-bromophenyl)acetic acid (2.00 g, 9.3 mmol),  $(\text{COCl})_2$  (1.12 mL, 11.80 mmol), isopropylamine (1.10 g, 18.6 mmol). The crude product was recrystallized from EtOAc/ petroleum ether to give **1f** as a white solid (1.74 g, 73%). M.p. 155-156 °C; IR (KBr,  $\text{cm}^{-1}$ ): 3281, 3071, 2971, 1638, 1550, 1440, 1416, 1358, 1251, 1028, 739;  $^1\text{H}$  NMR ( $\text{CDCl}_3$ , 500 MHz):  $\delta$  7.58 (d,  $J$  = 8.5 Hz, 1H), 7.36-7.29 (m, 2H), 7.16 (td,  $J$  = 8.0, 2.0 Hz, 1H), 5.24 (br, 1H), 4.11-4.04 (m, 1H), 3.66 (s, 2H), 1.09 (d,  $J$  = 6.5 Hz, 6H);  $^{13}\text{C}$  NMR ( $\text{CDCl}_3$ , 125 MHz):  $\delta$  168.5, 135.1, 133.1, 131.7, 129.0, 128.0, 124.9, 44.3, 41.6, 22.6; LC-MS (ESI)  $m/z$ : 258 [ $\text{M}^+\text{H}$  ( $^{81}\text{Br}$ )], 256 [ $\text{M}^+\text{H}$  ( $^{79}\text{Br}$ )].

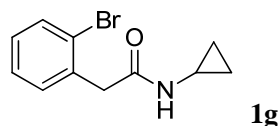

**2-(2-bromophenyl)-N-cyclopropylacetamide (1g)**: Following the same procedure as Method A with (2-bromophenyl)acetic acid (2.00 g, 9.3 mmol),  $(\text{COCl})_2$  (1.12 mL, 11.80 mmol), cyclopropylamine (1.06 g, 18.6 mmol). The crude product was recrystallized from EtOAc/ petroleum ether to give **1g** as a white solid (1.51 g, 64%). M.p. 158-160 °C; IR (KBr,  $\text{cm}^{-1}$ ): 3271, 3063, 1655, 1543, 1472, 1264, 1025, 773;  $^1\text{H}$  NMR ( $\text{CDCl}_3$ , 500 MHz):  $\delta$  7.57 (d,  $J$  = 8.0 Hz, 1H), 7.34-7.28 (m, 2H), 7.15 (td,  $J$  = 8.0, 2.0 Hz, 1H), 5.58 (br, 1H), 3.65 (s, 2H), 2.68-2.65 (m, 1H), 0.74-0.70 (m, 2H), 0.45-0.42 (m, 2H);  $^{13}\text{C}$  NMR ( $\text{CDCl}_3$ , 125 MHz):  $\delta$  170.9, 134.9, 133.1, 131.7, 129.1, 128.0, 124.9, 44.0, 22.8, 6.6; LC-MS (ESI)  $m/z$ : 256 [ $\text{M}^+\text{H}$  ( $^{81}\text{Br}$ )], 254 [ $\text{M}^+\text{H}$  ( $^{79}\text{Br}$ )]; HRMS:  $m/z$  calcd for  $\text{C}_{11}\text{H}_{13}\text{BrNO}$  [ $\text{M}^+\text{H}$ ] 254.0175; Found: 254.0174.

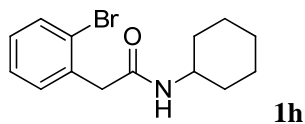

**2-(2-bromophenyl)-N-cyclohexylacetamide (1h)**: Following the same procedure as Method A with (2-bromophenyl)acetic acid (2.00 g, 9.3 mmol),  $(\text{COCl})_2$  (1.12 mL, 11.80 mmol), cyclohexylamine (1.84 g, 18.6 mmol). The crude product was recrystallized from EtOAc/ petroleum ether to give **1h** as a white solid (1.78 g, 65%). M.p. 168-170 °C; IR (KBr,  $\text{cm}^{-1}$ ): 3288, 2932, 1639, 1545, 1472, 1248, 1028, 737;  $^1\text{H}$  NMR ( $\text{CDCl}_3$ , 500 MHz):  $\delta$  7.56 (d,  $J$  = 8.0 Hz, 1H), 7.34-7.27 (m, 2H), 7.15-7.12 (m, 1H), 5.41 (br, 1H), 3.78-3.72 (m, 1H), 3.65 (s, 2H), 1.85-1.00 (m, 10H);  $^{13}\text{C}$  NMR ( $\text{CDCl}_3$ , 125 MHz):  $\delta$  168.5, 135.1, 133.1, 131.7, 129.0, 128.0, 125.0, 48.3, 44.3, 32.8, 25.5, 24.7; LC-MS (ESI)  $m/z$ : 298 [ $\text{M}^+\text{H}$  ( $^{81}\text{Br}$ )], 296 [ $\text{M}^+\text{H}$  ( $^{79}\text{Br}$ )]; HRMS:  $m/z$  calcd for  $\text{C}_{14}\text{H}_{19}\text{BrNO}$  [ $\text{M}^+\text{H}$ ] 296.0645; Found: 296.0645.

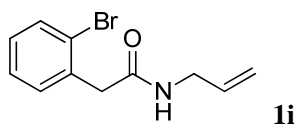

**N-allyl-2-(2-bromophenyl)acetamide (1i):** Following the same procedure as Method A with (2-bromophenyl)acetic acid (2.00 g, 9.3 mmol), (COCl)<sub>2</sub> (1.12 mL, 11.80 mmol), allylamine (1.06 g, 18.6 mmol). The crude product was recrystallized from EtOAc/ petroleum ether to give **1i** as a white solid (1.29 g, 55%). M.p. 103-104 °C; IR (KBr, cm<sup>-1</sup>): 3285, 3064, 1652, 1639, 1553, 1408, 1244, 1028, 736; <sup>1</sup>H NMR (CDCl<sub>3</sub>, 500 MHz): δ 7.59 (d, *J* = 8.0 Hz, 1H), 7.37-7.30 (m, 2H), 7.17 (td, *J* = 8.0, 1.5 Hz, 1H), 5.82-5.75 (m, 1H), 5.56 (br, 1H), 5.13-5.07 (m, 2H), 3.87-3.85 (m, 2H), 3.74 (s, 2H); <sup>13</sup>C NMR (CDCl<sub>3</sub>, 125 MHz): δ 169.6, 134.8, 133.9, 133.2, 131.8, 129.2, 128.1, 125.0, 116.2, 43.9, 42.0; LC-MS (ESI) *m/z*: 256 [M<sup>+</sup>H (<sup>81</sup>Br)], 254 [M<sup>+</sup>H (<sup>79</sup>Br)]; HRMS: *m/z* calcd for C<sub>11</sub>H<sub>13</sub>BrNO [M<sup>+</sup>H] 254.0175; Found: 254.0176.

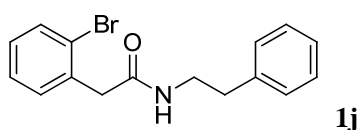

**2-(2-bromophenyl)-N-phenethylacetamide (1j)<sup>5</sup>:** Following the same procedure as Method A with (2-bromophenyl)acetic acid (2.00 g, 9.3 mmol), (COCl)<sub>2</sub> (1.12 mL, 11.80 mmol), phenethylamine (2.25 g, 18.6 mmol). The crude product was recrystallized from EtOAc/ petroleum ether to give **1j** as a white solid (2.27 g, 77%). M.p. 120-122 °C; IR (KBr, cm<sup>-1</sup>): 3268, 3083, 1643, 1561, 1026; <sup>1</sup>H NMR (CDCl<sub>3</sub>, 500 MHz): δ 7.59 (d, *J* = 8.5 Hz, 1H), 7.30-7.16 (m, 6H), 7.09 (d, *J* = 7.0 Hz, 2H), 5.49 (br, 1H), 3.69 (s, 2H), 3.51 (q, *J* = 6.5 Hz, 2H), 2.78 (t, *J* = 6.9 Hz, 2H); <sup>13</sup>C NMR (CDCl<sub>3</sub>, 125 MHz): δ 169.5, 138.7, 134.8, 133.1, 131.8, 129.1, 128.7, 128.6, 128.0, 126.4, 125.0, 44.0, 40.8, 35.5; LC-MS (ESI) *m/z*: 320 [M<sup>+</sup>H (<sup>81</sup>Br)], 318 [M<sup>+</sup>H (<sup>79</sup>Br)].

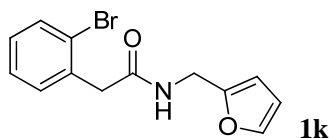

**2-(2-bromophenyl)-N-(furan-2-ylmethyl)acetamide (1k):** Following the same procedure as Method A with (2-bromophenyl)acetic acid (2.00 g, 9.3 mmol), (COCl)<sub>2</sub> (1.12 mL, 11.80 mmol), furan-2-ylmethanamine (1.80 g, 18.6 mmol). The crude product was recrystallized from EtOAc/ petroleum ether to give **1k** as a white solid (1.58 g, 58%). M.p. 126-128 °C; IR (KBr, cm<sup>-1</sup>): 3281, 3069, 1647, 1548, 1027, 744; <sup>1</sup>H NMR (CDCl<sub>3</sub>, 500 MHz): δ 7.57 (d, *J* = 8.0 Hz, 1H), 7.35-7.28 (m, 3H), 7.15 (td, *J* = 8.0, 1.5 Hz, 1H), 6.29-6.28 (m, 1H), 6.17 (d, *J* = 3.0 Hz, 1H), 5.87 (br, 1H), 4.41 (d, *J* = 6.0 Hz, 2H), 3.72 (s, 2H); <sup>13</sup>C NMR (CDCl<sub>3</sub>, 125 MHz): δ 169.4, 151.2, 142.1, 134.6, 133.1, 131.7, 129.2, 128.0, 125.0, 110.4, 107.3, 43.9, 36.7; LC-MS (ESI) *m/z*: 296 [M<sup>+</sup>H (<sup>81</sup>Br)], 294 [M<sup>+</sup>H (<sup>79</sup>Br)]; HRMS: *m/z* calcd for C<sub>13</sub>H<sub>12</sub>BrNNaO<sub>2</sub> [M<sup>+</sup>] 315.9944; Found: 315.9936.

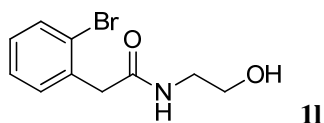

**2-(2-bromophenyl)-N-(2-hydroxyethyl)acetamide (1l)<sup>6</sup>:** Following the same procedure as Method A with (2-bromophenyl)acetic acid (2.00 g, 9.3 mmol), (COCl)<sub>2</sub> (1.12 mL, 11.80 mmol),

ethanolamine (1.13 g, 18.6 mmol). The crude product was recrystallized from EtOAc/ petroleum ether to give **1l** as a white solid (1.41 g, 59%). M.p. 95-96 °C; IR (KBr,  $\text{cm}^{-1}$ ): 3445, 3282, 1655, 1559, 1028;  $^1\text{H}$  NMR ( $\text{CDCl}_3$ , 500 MHz):  $\delta$  7.58 (d,  $J = 8.0$  Hz, 1H), 7.35-7.29 (m, 2H), 7.18-7.14 (m, 1H), 6.08 (br, 1H), 3.71 (s, 2H), 3.67 (t,  $J = 5.0$  Hz, 2H), 3.39-3.36 (m, 2H), 2.63 (s, 1H);  $^{13}\text{C}$  NMR ( $\text{CDCl}_3$ , 125 MHz):  $\delta$  170.9, 134.6, 133.2, 131.8, 129.3, 128.1, 125.0, 62.1, 43.9, 42.8; LC-MS (ESI)  $m/z$ : 260 [ $\text{M}^+\text{H}$  ( $^{81}\text{Br}$ )], 258 [ $\text{M}^+\text{H}$  ( $^{79}\text{Br}$ )].

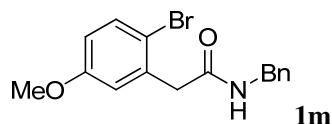

**N-benzyl-2-(2-bromo-5-methoxyphenyl)acetamide (1m):** Following the same procedure as Method B with (2-bromo-5-methoxy)phenylacetic acid (0.49 g, 2.0 mmol), DCC (0.49 g, 2.4 mmol), benzylamine (0.26 g, 2.4 mmol). The crude product was purified by flash chromatography with EtOAc/ petroleum ether (1:1) to give **1m** as a white solid (0.50 g, 75%). M.p. 146-147 °C; IR (KBr,  $\text{cm}^{-1}$ ): 3284, 3075, 3031, 1646, 1553, 1473, 1257, 1053, 1017, 797, 691;  $^1\text{H}$  NMR ( $\text{CDCl}_3$ , 500 MHz):  $\delta$  7.47 (d,  $J = 9.0$  Hz, 1H), 7.34-7.24 (m, 5H), 6.92 (d,  $J = 3.0$  Hz, 1H), 6.74 (dd,  $J = 8.5, 2.5$  Hz, 1H), 5.93 (br, 1H), 4.45 (d,  $J = 5.5$  Hz, 2H), 3.79 (s, 3H), 3.73 (s, 2H);  $^{13}\text{C}$  NMR ( $\text{CDCl}_3$ , 125 MHz):  $\delta$  169.5, 159.3, 138.0, 135.6, 133.7, 128.7, 127.5, 127.5, 117.1, 115.2, 115.2, 55.5, 44.2, 43.7; LC-MS (ESI)  $m/z$ : 336 [ $\text{M}^+\text{H}$  ( $^{81}\text{Br}$ )], 334 [ $\text{M}^+\text{H}$  ( $^{79}\text{Br}$ )]; HRMS:  $m/z$  calcd for  $\text{C}_{16}\text{H}_{17}\text{BrNO}_2$  [ $\text{M}^+\text{H}$ ] 334.0437; Found: 334.0442.

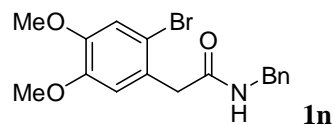

**N-benzyl-2-(2-bromo-4,5-dimethoxyphenyl)acetamide (1n):** Following the same procedure as Method B with (2-bromo-4,5-dimethoxy)phenylacetic acid (0.55 g, 2.0 mmol), DCC (0.49 g, 2.4 mmol), benzylamine (0.26 g, 2.4 mmol). The crude product was purified by flash chromatography with EtOAc/ petroleum ether (1:1) to give **1n** as a white solid (0.41 g, 56%). M.p. 156-157 °C; IR (KBr,  $\text{cm}^{-1}$ ): 3293, 3063, 2930, 2850, 1641, 1509, 1257, 1216, 1033, 697;  $^1\text{H}$  NMR ( $\text{CDCl}_3$ , 500 MHz):  $\delta$  7.34-7.24 (m, 5H), 7.04 (s, 1H), 6.87 (s, 1H), 5.84 (br, 1H), 4.46 (d,  $J = 5.5$  Hz, 2H), 3.88 (s, 3H), 3.87 (s, 3H), 3.72 (s, 2H);  $^{13}\text{C}$  NMR ( $\text{CDCl}_3$ , 125 MHz):  $\delta$  169.9, 149.0, 148.8, 138.1, 128.7, 127.6, 127.5, 126.5, 115.6, 114.8, 113.8, 56.2, 56.1, 43.7, 33.7; LC-MS (ESI)  $m/z$ : 366 [ $\text{M}^+\text{H}$  ( $^{81}\text{Br}$ )], 364 [ $\text{M}^+\text{H}$  ( $^{79}\text{Br}$ )]; HRMS:  $m/z$  calcd for  $\text{C}_{17}\text{H}_{19}\text{BrNO}_3$  [ $\text{M}^+\text{H}$ ] 364.0543; Found: 364.0542.

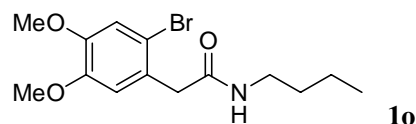

**2-(2-bromo-4,5-dimethoxyphenyl)-N-butylacetamide (1o):** Following the same procedure as Method B with (2-bromo-4,5-dimethoxy)phenylacetic acid (0.55 g, 2.0 mmol), DCC (0.49 g, 2.4 mmol), butylamine (0.18 g, 2.4 mmol). The crude product was purified by flash chromatography with EtOAc/ petroleum ether (1:1) to give **1o** as a white solid (0.31 g, 47%). M.p. 116-118 °C; IR (KBr,  $\text{cm}^{-1}$ ): 3297, 3069, 2960, 1637, 1545, 1512, 1261, 1213, 1029, 846, 564;  $^1\text{H}$  NMR ( $\text{CDCl}_3$ , 500 MHz):  $\delta$  7.03 (s, 1H), 6.83 (s, 1H), 5.47 (br, 1H), 3.88 (s, 3H), 3.87 (s, 3H); 3.61 (s, 2H), 3.21



(q,  $J = 7.0$  Hz, 2H), 1.45-1.39 (m, 2H), 1.30-1.25 (m, 2H), 0.88 (t,  $J = 7.5$  Hz, 3H);  $^{13}\text{C}$  NMR ( $\text{CDCl}_3$ , 125 MHz):  $\delta$  169.8, 148.9, 148.7, 126.8, 115.6, 114.7, 113.8, 56.2, 56.1, 43.7, 39.4, 31.5, 20.0, 13.7; LC-MS (ESI)  $m/z$ : 332 [ $\text{M}^+\text{H}$  ( $^{81}\text{Br}$ )], 330 [ $\text{M}^+\text{H}$  ( $^{79}\text{Br}$ )]; HRMS:  $m/z$  calcd for  $\text{C}_{14}\text{H}_{21}\text{BrNO}_3$  [ $\text{M}^+\text{H}$ ] 330.0699; Found: 330.0688.

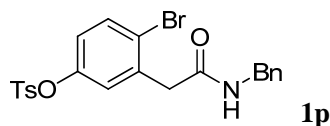

**4-(2-(benzylamino)-2-oxoethyl)-3-bromophenyl-4-methylbenzenesulfonate (1p):** To a solution of **1m** (0.71 g, 1.5 mmol) in 30 mL of  $\text{CH}_2\text{Cl}_2$  at  $0^\circ\text{C}$  was added  $\text{BBr}_3$  (4 N, 288  $\mu\text{L}$ , 3.0 mmol). The resulting mixture was allowed to warm to the room temperature and stirred overnight. After the reaction was completed, the mixture was poured into ice water and extracted with EtOAc ( $2 \times 30$  mL). The organic layer was washed with saturated  $\text{NaHCO}_3$  solution and saturated brine. The combined organic phase was dried over  $\text{Na}_2\text{SO}_4$ , concentrated in vacuo, purified by flash column chromatography (EtOAc/ petroleum ether =1:1) to give the crude phenol. Then a solution of the crude phenol and  $\text{Et}_3\text{N}$  (140  $\mu\text{L}$ , 1.5 mmol) in  $\text{CH}_2\text{Cl}_2$  (30 mL) was added tosyl chloride (0.28 g, 1.5 mmol). The reaction mixture was stirred at room temperature for 12 h. The organic layer was washed with saturated  $\text{NaHCO}_3$  solution and saturated brine. Combined organic phase was dried over  $\text{Na}_2\text{SO}_4$ , concentrated in vacuo, purified on flash column chromatography (EtOAc/petroleum ether =1:5) to give **1p** as a white solid (0.55 g, 78%). M.p.  $117\text{-}118^\circ\text{C}$ ; IR (KBr,  $\text{cm}^{-1}$ ): 3343, 3068, 1663, 1546, 1380, 1246, 1178, 1092, 833, 577;  $^1\text{H}$  NMR ( $\text{CDCl}_3$ , 500 MHz):  $\delta$  7.69 (d,  $J = 8.0$  Hz, 2H), 7.50 (d,  $J = 8.5$  Hz, 1H), 7.35-7.24 (m, 7H), 7.06 (d,  $J = 3.0$  Hz, 1H), 6.81 (dd,  $J = 8.5, 2.5$  Hz, 1H), 5.86 (br, 1H), 4.43 (d,  $J = 5.5$  Hz, 2H), 3.66 (s, 2H), 2.46 (s, 3H);  $^{13}\text{C}$  NMR ( $\text{CDCl}_3$ , 125 MHz):  $\delta$  168.5, 148.9, 145.8, 137.9, 136.6, 134.0, 132.0, 130.0, 128.7, 128.5, 127.6, 127.6, 125.6, 123.1, 123.0, 43.8, 21.8; LC-MS (ESI)  $m/z$ : 476 [ $\text{M}^+\text{H}$  ( $^{81}\text{Br}$ )], 474 [ $\text{M}^+\text{H}$  ( $^{79}\text{Br}$ )]; HRMS:  $m/z$  calcd for  $\text{C}_{22}\text{H}_{21}\text{BrNO}_4\text{S}$  [ $\text{M}^+\text{H}$ ] 474.0369; Found: 474.0390.

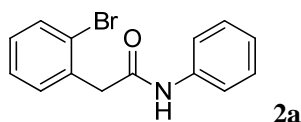

**2-(2-bromophenyl)-N-phenylacetamide (2a)**<sup>7</sup>: Following the same procedure as Method A with (2-bromophenyl)acetic acid (1.00 g, 4.65 mmol),  $(\text{COCl})_2$  (0.56 mL, 5.90 mmol), aniline (0.87 g, 9.3 mmol). The crude product was recrystallized from EtOAc/ petroleum ether to give **2a** as a white solid (1.21 g, 90%). M.p.  $150\text{-}151^\circ\text{C}$ ; IR (KBr,  $\text{cm}^{-1}$ ): 3425, 3263, 1655, 1534, 751;  $^1\text{H}$  NMR ( $\text{CDCl}_3$ , 500 MHz):  $\delta$  7.65 (d,  $J = 8.0$  Hz, 1H), 7.48-7.44 (m, 3H), 7.39-7.29 (m, 4H), 7.23 (td,  $J = 8.0, 1.5$  Hz, 1H), 7.12 (t,  $J = 7.5$  Hz, 1H), 3.90 (s, 2H);  $^{13}\text{C}$  NMR ( $\text{CDCl}_3$ , 125 MHz):  $\delta$  167.7, 137.6, 134.5, 133.3, 131.8, 129.4, 129.0, 128.2, 125.0, 124.6, 120.0, 45.1; LC-MS (ESI)  $m/z$ : 292 [ $\text{M}^+\text{H}$  ( $^{81}\text{Br}$ )], 290 [ $\text{M}^+\text{H}$  ( $^{79}\text{Br}$ )].

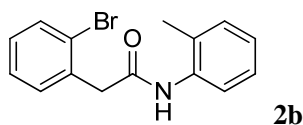

**2-(2-bromophenyl)-N-(o-tolyl)acetamide (2b):** Following the same procedure as Method A with (2-bromophenyl)acetic acid (1.00 g, 4.65 mmol),  $(\text{COCl})_2$  (0.56 mL, 5.90 mmol), *o*-toluidine (1.00

g, 9.3 mmol). The crude product was recrystallized from EtOAc/ petroleum ether to give **2b** as a white solid (1.13 g, 80%). M.p. 183-184°C; IR (KBr,  $\text{cm}^{-1}$ ): 3470, 3254, 1654, 1530, 754;  $^1\text{H}$  NMR ( $\text{CDCl}_3$ , 500 MHz):  $\delta$  7.86 (d,  $J = 7.5$  Hz, 1H), 7.65 (d,  $J = 8.0$  Hz, 1H), 7.45 (d,  $J = 6.5$  Hz, 1H), 7.37 (t,  $J = 7.5$  Hz, 1H), 7.24-7.15 (m, 2H), 7.11 (d,  $J = 7.0$  Hz, 1H), 7.06-6.99 (m, 2H), 3.93 (s, 2H), 2.03 (s, 3H);  $^{13}\text{C}$  NMR (125 MHz,  $\text{CDCl}_3$ ):  $\delta$  167.6, 135.5, 134.8, 133.4, 131.9, 130.4, 130.1, 128.6, 128.3, 126.8, 125.2, 125.1, 122.5, 45.1, 17.4; MS (EI)  $m/z$  (%): 305 (13) [ $\text{M}^+$  ( $^{81}\text{Br}$ )], 303 (14) [ $\text{M}^+$  ( $^{79}\text{Br}$ )], 224 (71), 169 (24), 107 (100), 91 (22); Anal. Calcd. for  $\text{C}_{15}\text{H}_{14}\text{BrNO}$ : C, 59.23; H, 4.64; N, 4.60. Found: C, 59.31; H, 4.60; N, 4.61.

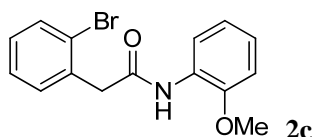

**2-(2-bromophenyl)-N-(2-methoxyphenyl)acetamide (2c)**: Following the same procedure as Method A with (2-bromophenyl)acetic acid (1.00 g, 4.65 mmol),  $(\text{COCl})_2$  (0.56 mL, 5.90 mmol), 2-methoxyaniline (1.15 g, 9.3 mmol). The crude product was recrystallized from EtOAc/ petroleum ether to give **2c** as a white solid (1.16 g, 78%). M.p. 133-134°C; IR (KBr,  $\text{cm}^{-1}$ ): 3455, 3260, 1659, 1538, 750;  $^1\text{H}$  NMR ( $\text{CDCl}_3$ , 500 MHz):  $\delta$  8.35 (dd,  $J = 8.0, 1.5$  Hz, 1H), 7.92 (br, 1H), 7.62 (dd,  $J = 8.0, 0.5$  Hz, 1H), 7.44 (dd,  $J = 7.5, 1.5$  Hz, 1H), 7.34 (td,  $J = 7.5, 1.0$  Hz, 1H), 7.19 (td,  $J = 8.0, 1.5$  Hz, 1H), 7.02 (td,  $J = 7.5, 1.5$  Hz, 1H), 6.95-6.92 (m, 1H), 6.83-6.82 (m, 1H), 3.90 (s, 2H), 3.77 (s, 3H);  $^{13}\text{C}$  NMR ( $\text{CDCl}_3$ , 125 MHz):  $\delta$  167.5, 147.9, 134.7, 133.1, 131.8, 129.2, 128.0, 127.6, 125.0, 123.8, 121.1, 119.6, 110.0, 55.8, 45.3; MS (EI)  $m/z$  (%): 321 (25) [ $\text{M}^+$  ( $^{81}\text{Br}$ )], 319 (26) [ $\text{M}^+$  ( $^{79}\text{Br}$ )], 123 (100). HRMS:  $m/z$  calcd for  $\text{C}_{15}\text{H}_{14}\text{BrNNaO}_2$  [ $\text{M}^+$ ] 342.0100; Found: 342.0106.

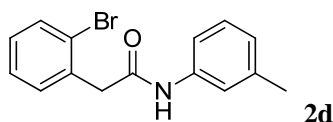

**2-(2-bromophenyl)-N-(m-tolyl)acetamide (2d)**: Following the same procedure as Method A with (2-bromophenyl)acetic acid (1.00 g, 4.65 mmol),  $(\text{COCl})_2$  (0.56 mL, 5.90 mmol), m-Toluidine (1.00 g, 9.3 mmol). The crude product was recrystallized from EtOAc/ petroleum ether to give **2d** as a white solid (1.17 g, 83%). M.p. 128-130 °C; IR (KBr,  $\text{cm}^{-1}$ ): 3265, 1653, 1538, 1026, 751;  $^1\text{H}$  NMR ( $\text{CDCl}_3$ , 500 MHz):  $\delta$  7.63 (d,  $J = 7.5$  Hz, 1H), 7.43 (d,  $J = 7.5$  Hz, 1H), 7.35 (t,  $J = 7.0$  Hz, 1H), 7.30-7.16 (m, 5H), 6.91 (d,  $J = 7.0$  Hz, 1H), 3.87 (s, 2H), 2.31 (s, 3H);  $^{13}\text{C}$  NMR ( $\text{CDCl}_3$ , 125 MHz):  $\delta$  167.7, 139.0, 137.5, 134.5, 133.3, 131.8, 129.4, 128.8, 128.2, 125.4, 125.0, 120.6, 117.0, 45.1, 21.4; LC-MS (ESI)  $m/z$ : 306 [ $\text{M}^+\text{H}$  ( $^{81}\text{Br}$ )], 304 [ $\text{M}^+\text{H}$  ( $^{79}\text{Br}$ )]; HRMS:  $m/z$  calcd for  $\text{C}_{15}\text{H}_{15}\text{BrNO}$  [ $\text{M}^+\text{H}$ ] 304.0332; Found: 304.0338.

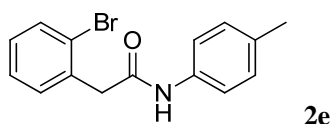

**2-(2-bromophenyl)-N-(p-tolyl)acetamide (2e)**: Following the same procedure as Method A with (2-bromophenyl)acetic acid (1.00 g, 4.65 mmol),  $(\text{COCl})_2$  (0.56 mL, 5.90 mmol), p-toluidine (1.00 g, 9.3 mmol). The crude product was recrystallized from EtOAc/ petroleum ether to give **2e** as a

white solid (1.20 g, 85%). M.p. 128-130 °C; IR (KBr,  $\text{cm}^{-1}$ ): 3265, 1653, 1538, 1026, 751;  $^1\text{H}$  NMR ( $\text{CDCl}_3$ , 500 MHz):  $\delta$  7.63 (d,  $J = 7.5$  Hz, 1H), 7.43 (d,  $J = 7.5$  Hz, 1H), 7.35 (t,  $J = 7.0$  Hz, 1H), 7.30-7.16 (m, 5H), 6.91 (d,  $J = 7.0$  Hz, 1H), 3.87 (s, 2H), 2.31 (s, 3H);  $^{13}\text{C}$  NMR ( $\text{CDCl}_3$ , 125 MHz):  $\delta$  167.7, 139.0, 137.5, 134.5, 133.3, 131.8, 129.4, 128.8, 128.2, 125.4, 125.0, 120.6, 117.0, 45.1, 21.4; LC-MS (ESI)  $m/z$ : 306 [ $\text{M}^+\text{H}$  ( $^{81}\text{Br}$ )], 304 [ $\text{M}^+\text{H}$  ( $^{79}\text{Br}$ )]; HRMS:  $m/z$  calcd for  $\text{C}_{15}\text{H}_{15}\text{BrNO}$  [ $\text{M}^+\text{H}$ ] 304.0332; Found: 304.0338.

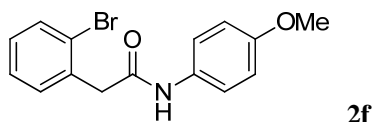

**2-(2-bromophenyl)-N-(4-methoxyphenyl)acetamide (2f)**: Following the same procedure as Method A with (2-bromophenyl)acetic acid (1.00 g, 4.65 mmol),  $(\text{COCl})_2$  (0.56 mL, 5.90 mmol), 4-methoxyaniline (1.15 g, 9.3 mmol). The crude product was recrystallized from EtOAc/petroleum ether to give **2f** as a white solid (1.34 g, 90%). M.p. 179-181°C; IR (KBr,  $\text{cm}^{-1}$ ): 3473, 3270, 1659, 1533, 1246, 1028;  $^1\text{H}$  NMR ( $\text{CDCl}_3$ , 500 MHz): 7.63-7.61 (m, 1H), 7.43-7.41 (m, 1H), 7.35-7.33 (m, 3H), 7.19 (td,  $J = 8.0, 1.5$  Hz, 1H), 7.15 (br, 1H), 6.82 (d,  $J = 9.0$  Hz, 2H), 3.85 (s, 2H), 3.77 (s, 3H);  $^{13}\text{C}$  NMR ( $\text{CDCl}_3$ , 125 MHz):  $\delta$  167.7, 156.6, 134.6, 133.3, 131.8, 130.7, 129.4, 128.2, 125.0, 122.1, 114.1, 55.5, 44.9. MS (EI)  $m/z$ : 321 (29) [ $\text{M}^+$  ( $^{81}\text{Br}$ )], 319 (30) [ $\text{M}^+$  ( $^{79}\text{Br}$ )], 149 (16), 123 (100), 122 (24), 90 (14), 89 (13); Anal. Calcd. for  $\text{C}_{15}\text{H}_{14}\text{BrNO}_2$ : C, 56.27; H, 4.41; N, 4.37. Found: C, 56.51; H, 4.37; N, 4.48.

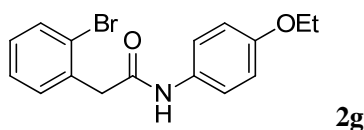

**2-(2-bromophenyl)-N-(4-ethoxyphenyl)acetamide (2g)**: Following the same procedure as Method A with (2-bromophenyl)acetic acid (1.00 g, 4.65 mmol),  $(\text{COCl})_2$  (0.56 mL, 5.90 mmol), 4-ethoxyaniline (1.28 g, 9.3 mmol). The crude product was recrystallized from EtOAc/petroleum ether to give **2g** as a white solid (1.25 g, 82%). M.p. 172-174°C; IR (KBr,  $\text{cm}^{-1}$ ): 3461, 3282, 1659, 1530, 1246;  $^1\text{H}$  NMR ( $\text{CDCl}_3$ , 500 MHz): 7.62 (d,  $J = 8.0$  Hz, 1H), 7.42-7.41 (m, 1H), 7.35-7.31 (m, 3H), 7.21-7.18 (m, 2H), 6.81 (dd,  $J = 7.0, 2.0$  Hz, 2H), 3.98 (q,  $J = 7.0$  Hz, 2H), 3.84 (s, 2H), 1.38 (t,  $J = 7.0$  Hz, 3H);  $^{13}\text{C}$  NMR ( $\text{CDCl}_3$ , 125 MHz):  $\delta$  167.6, 156.0, 134.7, 133.2, 131.8, 130.6, 129.4, 128.2, 125.0, 122.0, 114.7, 63.7, 44.9, 14.8; MS (EI)  $m/z$ : 335 (47) [ $\text{M}^+$  ( $^{81}\text{Br}$ )], 333 (48) [ $\text{M}^+$  ( $^{79}\text{Br}$ )], 171 (22), 169 (23), 137 (100), 109 (45), 108 (62); Anal. Calcd. for  $\text{C}_{15}\text{H}_{14}\text{BrNO}$ : C, 57.50; H, 4.83; N, 4.19. Found: C, 57.47; H, 4.76; N, 4.15.

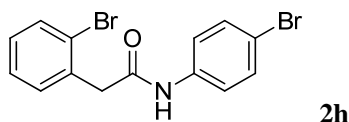

**2-(2-bromophenyl)-N-(4-bromophenyl)acetamide (2h)**: Following the same procedure as Method A with (2-bromophenyl)acetic acid (1.00 g, 4.65 mmol),  $(\text{COCl})_2$  (0.56 mL, 5.90 mmol), 4-bromoaniline (1.60 g, 9.3 mmol). The crude product was recrystallized from EtOAc/petroleum ether to give **2h** as a white solid (0.99 g, 58%). M.p. 168-170°C; IR (KBr,  $\text{cm}^{-1}$ ): 3294, 3243, 1658, 1520, 1070, 827, 742, 500;  $^1\text{H}$  NMR ( $\text{CDCl}_3$ , 500 MHz): 7.62 (d,  $J = 8.0$  Hz, 1H), 7.45-7.36 (m, 6H), 7.27-7.22 (m, 2H), 3.89 (s, 2H);  $^{13}\text{C}$  NMR ( $\text{CDCl}_3$ , 125 MHz):  $\delta$  167.8, 136.7, 134.2, 133.3,

131.9, 131.8, 129.6, 128.3, 124.9, 122.6, 117.2, 45.0; LC-MS (ESI)  $m/z$ : 372 [ $M^+H$  ( $^{81}Br \times 2$ )], 370 [ $M^+H$  ( $^{81}Br$ )( $^{79}Br$ )], 368 [ $M^+H$  ( $^{79}Br \times 2$ )]; HRMS:  $m/z$  calcd for  $C_{14}H_{12}Br_2NO$  [ $M^+H$ ] 367.9280; Found: 367.9278.

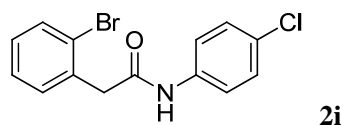

**2-(2-bromophenyl)-N-(4-chlorophenyl)acetamide (2i)**: Following the same procedure as Method A with (2-bromophenyl)acetic acid (1.00 g, 4.65 mmol),  $(COCl)_2$  (0.56 mL, 5.90 mmol), 4-chloroaniline (1.18 g, 9.3 mmol). The crude product was recrystallized from EtOAc/ petroleum ether to give **2i** as a white solid (1.05 g, 70%). M.p. 205-206 °C; IR (KBr,  $cm^{-1}$ ): 3439, 3297, 1660, 1520, 1397;  $^1H$  NMR ( $CDCl_3$ , 500 MHz): 7.65 (d,  $J = 8.0$  Hz, 1H), 7.43-7.23 (m, 8H), 3.88 (s, 2H);  $^{13}C$  NMR ( $CDCl_3$ , 125 MHz):  $\delta$  167.8, 136.2, 134.3, 133.3, 131.8, 129.5, 129.4, 129.0, 128.3, 124.9, 121.3, 45.0; MS (EI)  $m/z$ : 327 (4) [ $M^+$  ( $^{81}Br$ )( $^{37}Cl$ )], 325 (14) [ $M^+$  ( $^{81}Br$ )( $^{35}Cl$ )], 323 (11) [ $M^+$  ( $^{79}Br$ )( $^{35}Cl$ )], 171 (35), 169 (36), 127 (100), 90 (27), 89 (26). Anal. Calcd. for  $C_{14}H_{11}BrClNO$ : C, 51.80; H, 3.42; N, 4.32. Found: C, 52.09; H, 3.37; N, 4.05.

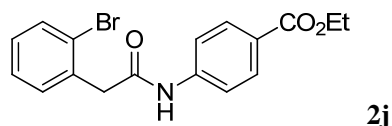

**Ethyl 4-(2-(2-bromophenyl)acetamido)benzoate (2j)**: Following the same procedure as Method B with 2-(2-bromophenyl)acetic acid (1.00 g, 4.65 mmol), DCC (1.15 g, 5.58 mmol), ethyl 4-aminobenzoate (0.92 g, 5.58 mmol). The crude product was purified by flash chromatography with EtOAc/ petroleum ether (1:1) to give **2j** as a white solid (1.09 g, 65%). M.p. 136-138 °C; IR (KBr,  $cm^{-1}$ ): 3257, 1698, 1674, 1674, 1597, 1540, 1281, 1253, 1023, 769, 748;  $^1H$  NMR ( $CDCl_3$ , 500 MHz): 7.97 (d,  $J = 8.5$  Hz, 2H), 7.63 (d,  $J = 5.0$  Hz, 1H), 7.53 (d,  $J = 8.5$  Hz, 2H), 7.48 (br, 1H), 7.42 (dd,  $J = 7.5, 1.5$  Hz, 1H), 7.35 (t,  $J = 7.5$  Hz, 1H), 7.21 (td,  $J = 8.0, 1.5$  Hz, 1H), 4.34 (q,  $J = 7.0$  Hz, 2H), 3.89 (s, 2H), 1.37 (t,  $J = 7.0$  Hz, 3H);  $^{13}C$  NMR ( $CDCl_3$ , 125 MHz):  $\delta$  169.0, 165.8, 144.0, 135.9, 132.8, 132.7, 130.8, 129.4, 128.1, 125.1, 124.6, 118.9, 60.9, 43.8, 14.7; LC-MS (ESI)  $m/z$ : 364 [ $M^+H$  ( $^{81}Br$ )], 362 [ $M^+H$  ( $^{79}Br$ )]; Anal. Calcd. for  $C_{17}H_{16}BrNO_3$ : C, 56.37; H, 4.45; N, 3.87. Found: C, 56.24; H, 4.47; N, 3.88.

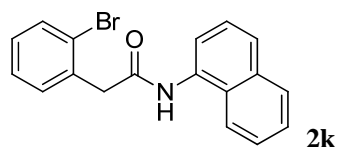

**2-(2-bromophenyl)-N-(naphthalen-1-yl)acetamide (2k)**: Following the same procedure as Method A with (2-bromophenyl)acetic acid (1.00 g, 4.65 mmol),  $(COCl)_2$  (0.56 mL, 5.90 mmol), 1-Aminonaphthalene (1.37 g, 9.3 mmol). The crude product was recrystallized from EtOAc/ petroleum ether to give **2k** as a white solid (0.76 g, 48%). M.p. 218-219 °C; IR (KBr,  $cm^{-1}$ ): 3240, 1649, 1537, 1029, 780, 749;  $^1H$  NMR ( $d_6$ -DMSO, 500 MHz):  $\delta$  10.20 (s, 1H), 8.16 (d,  $J = 8.0$  Hz, 1H), 7.95 (d,  $J = 8.0$  Hz, 1H), 7.78 (d,  $J = 8.0$  Hz, 1H), 7.70 (d,  $J = 7.5$  Hz, 1H), 7.65 (d,  $J = 8.0$  Hz, 1H), 7.60-7.50 (m, 4H), 7.39 (t,  $J = 7.0$  Hz, 1H), 7.24 (t,  $J = 7.5$  Hz, 1H), 4.04 (s, 2H);  $^{13}C$  NMR ( $d_6$ -DMSO, 125 MHz):  $\delta$  169.1, 136.5, 134.2, 134.0, 132.8, 132.8, 129.3, 128.6, 128.3,

128.1, 126.5, 126.3, 126.0, 125.8, 125.1, 123.2, 122.2, 43.4; LC-MS (ESI)  $m/z$ : 342 [ $M^+H$  ( $^{81}Br$ )], 340 [ $M^+H$  ( $^{79}Br$ )]; HRMS:  $m/z$  calcd for  $C_{18}H_{15}BrNO$  [ $M^+H$ ] 340.0332; Found: 340.0346.

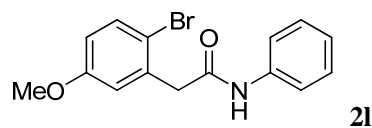

**2-(2-bromo-5-methoxyphenyl)-N-phenylacetamide (2l)**: Following the same procedure as Method B with (2-bromo-5-methoxy)phenylacetic acid (0.49 g, 2.0 mmol), DCC (0.50 g, 2.4 mmol), aniline (0.22 g, 2.4 mmol). The crude product was purified by flash chromatography with EtOAc/ petroleum ether (1:1) to give **2l** as a white solid (0.59 g, 92%). M.p. 192-193 °C; IR (KBr,  $cm^{-1}$ ): 3264, 1659, 1532, 1538, 1253, 1018, 807, 756, 696;  $^1H$  NMR ( $d_6$ -DMSO, 500 MHz):  $\delta$  10.18 (s, 1H), 7.58 (d,  $J = 7.5$  Hz, 2H), 7.47 (d,  $J = 8.5$  Hz, 1H), 7.29 (t,  $J = 7.0$  Hz, 2H), 7.02 (s, 2H), 6.81 (d,  $J = 7.5$  Hz, 1H), 3.79 (s, 2H), 3.74 (s, 3H);  $^{13}C$  NMR ( $d_6$ -DMSO, 125 MHz):  $\delta$  172.9, 163.7, 144.4, 141.9, 138.0, 133.9, 128.4, 124.2, 123.3, 120.1, 119.5, 60.6, 48.5; LC-MS (ESI)  $m/z$ : 320 [ $M^+H$ ]; HRMS:  $m/z$  calcd for  $C_{15}H_{14}BrNO_2$  [ $M^+H$ ] 320.0281; Found: 320.0272.

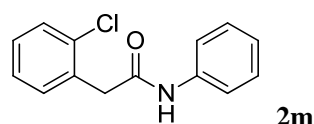

**2-(2-chlorophenyl)-N-phenylacetamide (2m)**<sup>8</sup>: Following the same procedure as Method A with (2-chlorophenyl)acetic acid (1.00 g, 5.86 mmol),  $(COCl)_2$  (0.63 mL, 7.43 mmol), aniline (1.09 g, 11.72 mmol). The crude product was recrystallized from EtOAc/ petroleum ether to give **2b** as a white solid (1.22 g, 85%). M.p. 126-128°C; IR (KBr,  $cm^{-1}$ ): 3296, 1659, 1598, 753, 692;  $^1H$  NMR ( $CDCl_3$ , 500 MHz):  $\delta$  7.48-7.41 (m, 5H), 7.32-7.29 (m, 4H), 7.11 (t,  $J = 7.0$  Hz, 1H), 3.86 (s, 2H);  $^{13}C$  NMR ( $CDCl_3$ , 125 MHz):  $\delta$  168.0, 137.7, 134.4, 132.7, 131.8, 129.9, 129.2, 129.0, 127.5, 124.5, 120.1, 42.5; LC-MS (ESI)  $m/z$ : 247 [ $M^+H$  ( $^{37}Cl$ )], 245 [ $M^+H$  ( $^{35}Cl$ )].

#### 4. General Procedure for the Cu-catalyzed *N*-alkyl substituted isatins synthesis

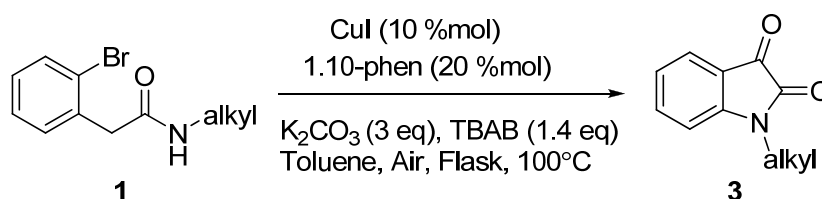

A 25 mL round bottom flask equipped with drying tube, a magnetic stirring bar, is charged with 2 mL of anhydrous toluene, *N*-alkyl-2-(2-halogenphenyl)acetamide **1** (0.25 mmol), CuI (4.8 mg, 0.025 mmol, 10 mol%), 1,10-Phen (9 mg, 0.05 mmol, 20 mol%),  $K_2CO_3$  (104 mg, 0.75 mmol, 3 equiv), TBAB (113 mg, 0.35 mmol, 1.4 equiv). The mixture was stirred at 100 °C in an oil bath, and monitored by TLC. Upon completion, the reaction mixture was eluted with  $H_2O$  (15 mL) and extracted with EtOAc ( $2 \times 15$  mL). The combined organic phase was washed with brine and dried over anhydrous  $Na_2SO_4$ . After that the organic phase was filtered, and the filtrate was evaporated in vacuum to give the crude product which was purified by column chromatography on silica gel using appropriate eluent.

## 5. Synthesis and characterization for *N*-alkyl substituted isatins products

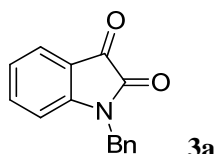

**1-benzylindoline-2,3-dione (3a)**<sup>9</sup>: According to the general procedure, a mixture of **1a** (76 mg, 0.25 mmol), CuI (4.8 mg, 0.025 mmol, 10 mol%), 1,10-Phen (9 mg, 0.05 mmol, 20 mol%), K<sub>2</sub>CO<sub>3</sub> (104 mg, 0.75 mmol, 3 equiv), TBAB (113 mg, 0.35 mmol, 1.4 equiv) in toluene (2 mL) was stirred at 100 °C for 8 h gave **3a** (EtOAc/petroleum ether = 1:5) as a red solid (44 mg, 74%). M.p. 130-132 °C; IR (KBr, cm<sup>-1</sup>): 1732, 1612, 1470, 1349, 1176, 1078, 1063, 765, 753, 694; <sup>1</sup>H NMR (CDCl<sub>3</sub>, 500 MHz): δ 7.60 (d, *J* = 7.5 Hz, 1H), 7.48 (td, *J* = 7.5, 1.0 Hz, 1H), 7.37-7.29 (m, 5H), 7.09 (t, *J* = 7.5 Hz, 1H), 6.78 (d, *J* = 8.0 Hz, 1H), 4.93 (s, 2H); <sup>13</sup>C NMR (CDCl<sub>3</sub>, 125 MHz): δ 183.3, 158.3, 150.7, 138.3, 134.5, 129.1, 128.2, 127.4, 125.4, 123.9, 117.7, 111.0, 44.1; MS (EI) *m/z* (%): 237 (35) [M<sup>+</sup>], 146 (49), 91 (48).

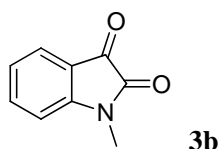

**1-methylindoline-2,3-dione (3b)**<sup>10</sup>: According to the general procedure, a mixture of **1b** (57 mg, 0.25 mmol), CuI (4.8 mg, 0.025 mmol, 10 mol%), 1,10-Phen (9 mg, 0.05 mmol, 20 mol%), K<sub>2</sub>CO<sub>3</sub> (104 mg, 0.75 mmol, 3 equiv), TBAB (113 mg, 0.35 mmol, 1.4 equiv) in toluene (2 mL) was stirred at 100 °C for 8 h gave **3b** (EtOAc/petroleum ether = 1:5) as a red solid (27 mg, 67%). M.p. 126-128 °C; IR (KBr, cm<sup>-1</sup>): 2924, 1745, 1607, 1470, 756; <sup>1</sup>H NMR (CDCl<sub>3</sub>, 500 MHz): δ 7.62-7.58 (m, 2H), 7.12 (t, *J* = 7.5 Hz, 1H), 6.89 (d, *J* = 8.0 Hz, 1H), 3.25 (s, 3H); <sup>13</sup>C NMR (CDCl<sub>3</sub>, 125 MHz): δ 183.8, 158.3, 151.5, 138.4, 125.3, 123.9, 117.5, 109.9, 26.2; MS (EI) *m/z* (%): 161 (72) [M<sup>+</sup>], 133 (32), 104 (100).

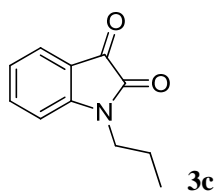

**1-propylindoline-2,3-dione (3c)**<sup>11</sup>: According to the general procedure, a mixture of **1c** (64 mg, 0.25 mmol), CuI (4.8 mg, 0.025 mmol, 10 mol%), 1,10-Phen (9 mg, 0.05 mmol, 20 mol%), K<sub>2</sub>CO<sub>3</sub> (104 mg, 0.75 mmol, 3 equiv), TBAB (113 mg, 0.35 mmol, 1.4 equiv) in toluene (2 mL) was stirred at 100 °C for 12 h gave **3c** (EtOAc/petroleum ether = 1:5) as a red solid (30 mg, 64%). M.p. 72-74 °C; IR (KBr, cm<sup>-1</sup>): 1743, 1612, 1470, 754; <sup>1</sup>H NMR (CDCl<sub>3</sub>, 500 MHz): δ 7.59-7.56 (m, 2H), 7.10 (t, *J* = 7.5 Hz, 1H), 6.89 (d, *J* = 8.0 Hz, 1H), 3.68 (t, *J* = 7.5 Hz, 2H), 1.75-1.71 (m, 2H), 0.99 (t, *J* = 7.0 Hz, 3H); <sup>13</sup>C NMR (CDCl<sub>3</sub>, 125 MHz): δ 183.7, 158.2, 151.1, 138.3, 125.4, 123.6, 117.6, 110.2, 41.8, 20.6, 11.4; MS (EI) *m/z* (%): 189 (57) [M<sup>+</sup>], 133 (100).

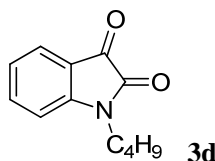

**1-butyldindoline-2,3-dione (3d)**<sup>12</sup>: According to the general procedure, a mixture of **1d** (67.5 mg, 0.25 mmol), CuI (4.8 mg, 0.025 mmol, 10 mol%), 1,10-Phen (9 mg, 0.05 mmol, 20 mol%), K<sub>2</sub>CO<sub>3</sub> (104 mg, 0.75 mmol, 3 equiv), TBAB (113 mg, 0.35 mmol, 1.4 equiv) in toluene (2 mL) was stirred at 100 °C for 12 h gave **3d** (EtOAc/petroleum ether = 1:5) as a red solid (31 mg, 61%). M.p. 36-38 °C; IR (KBr, cm<sup>-1</sup>): 1733, 1610, 1468, 752; <sup>1</sup>H NMR (CDCl<sub>3</sub>, 500 MHz): δ 7.58-7.56 (m, 2H), 7.09 (t, *J* = 7.5 Hz, 1H), 6.89 (d, *J* = 8.0 Hz, 1H), 3.70 (t, *J* = 7.5 Hz, 2H), 1.70-1.64 (m, 2H), 1.43-1.36 (m, 2H), 0.95 (t, *J* = 7.0 Hz, 3H); <sup>13</sup>C NMR (CDCl<sub>3</sub>, 125 MHz): δ 183.7, 158.1, 151.1, 138.3, 125.4, 123.6, 117.6, 110.3, 40.3, 29.3, 20.1, 13.7; MS (EI) *m/z* (%): 203 (39) [M<sup>+</sup>], 132 (100).

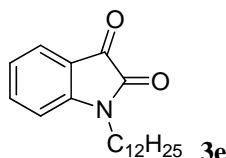

**1-dodecylindoline-2,3-dione (3e)**<sup>13</sup>: According to the general procedure, a mixture of **1e** (95.6 mg, 0.25 mmol), CuI (4.8 mg, 0.025 mmol, 10 mol%), 1,10-Phen (9 mg, 0.05 mmol, 20 mol%), K<sub>2</sub>CO<sub>3</sub> (104 mg, 0.75 mmol, 3 equiv), TBAB (113 mg, 0.35 mmol, 1.4 equiv) in toluene (2 mL) was stirred at 100 °C for 16 h gave **3e** (EtOAc/petroleum ether = 1:5) as a red solid (46 mg, 58%). M.p. 70-72 °C; IR (KBr, cm<sup>-1</sup>): 1738, 1610, 1466, 763; <sup>1</sup>H NMR (CDCl<sub>3</sub>, 500 MHz): δ 7.59-7.58 (m, 2H), 7.10 (t, *J* = 7.5 Hz, 1H), 6.89 (d, *J* = 8.0 Hz, 1H), 3.70 (t, *J* = 7.5 Hz, 2H), 1.70-1.66 (m, 2H), 1.35-1.24 (m, 18H), 0.89 (t, *J* = 7.0 Hz, 3H); <sup>13</sup>C NMR (CDCl<sub>3</sub>, 125 MHz): δ 183.7, 158.1, 151.1, 138.3, 125.4, 123.6, 117.6, 110.2, 40.3, 31.9, 29.6, 29.5, 29.5, 29.3, 29.2, 27.3, 26.9, 22.7, 14.1; MS (EI) *m/z* (%): 315 (60) [M<sup>+</sup>], 161(100).

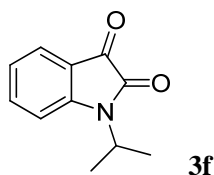

**1-isopropylindoline-2,3-dione (3f)**<sup>14</sup>: According to the general procedure, a mixture of **1f** (64 mg, 0.25 mmol), CuI (4.8 mg, 0.025 mmol, 10 mol%), 1,10-Phen (9 mg, 0.05 mmol, 20 mol%), K<sub>2</sub>CO<sub>3</sub> (104 mg, 0.75 mmol, 3 equiv), TBAB (113 mg, 0.35 mmol, 1.4 equiv) in toluene (2 mL) was stirred at 100 °C for 12 h gave **3f** (EtOAc/petroleum ether = 1:5) as a red solid (35 mg, 74%). M.p. 62-64 °C; IR (KBr, cm<sup>-1</sup>): 1739, 1608, 1732, 1468, 756; <sup>1</sup>H NMR (CDCl<sub>3</sub>, 500 MHz): δ 7.60-7.54 (m, 2H), 7.08 (t, *J* = 7.5 Hz, 1H), 7.03 (d, *J* = 8.0 Hz, 1H), 4.56-4.50 (m, 1H), 1.51 (d, *J* = 7.0 Hz, 6H); <sup>13</sup>C NMR (CDCl<sub>3</sub>, 125 MHz): δ 183.9, 157.9, 150.5, 138.1, 125.6, 123.3, 117.9, 111.3, 44.8, 19.4; MS (EI) *m/z* (%): 189 (64) [M<sup>+</sup>], 146 (100).

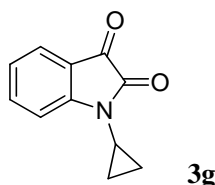

**1-cyclopropylindoline-2,3-dione (3g)**: According to the general procedure, a mixture of **1g** (64 mg, 0.25 mmol), CuI (4.8 mg, 0.025 mmol, 10 mol%), 1,10-Phen (9 mg, 0.05 mmol, 20 mol%), K<sub>2</sub>CO<sub>3</sub> (104 mg, 0.75 mmol, 3 equiv), TBAB (113 mg, 0.35 mmol, 1.4 equiv) in toluene (2 mL) was stirred at 100 °C for 6 h gave **3g** (EtOAc/petroleum ether = 1:5) as a red solid (32 mg, 69%).

M.p. 90-92 °C; IR (KBr,  $\text{cm}^{-1}$ ): 1741, 1611, 1428, 757;  $^1\text{H}$  NMR ( $\text{CDCl}_3$ , 500 MHz):  $\delta$  7.62-7.57 (m, 2H), 7.18 (d,  $J = 8.0$  Hz, 1H), 7.12 (t,  $J = 7.5$  Hz, 1H), 2.70-2.66 (m, 1H), 1.14-1.10 (m, 2H), 0.97-0.94 (m, 2H);  $^{13}\text{C}$  NMR ( $\text{CDCl}_3$ , 125 MHz):  $\delta$  183.7, 158.6, 151.9, 138.3, 125.0, 123.7, 117.3, 113.3, 22.2, 6.2; MS (EI)  $m/z$  (%): 187 (67) [ $\text{M}^+$ ], 132 (100); HRMS:  $m/z$  calcd for  $\text{C}_{11}\text{H}_{10}\text{NO}_2$  [ $\text{M}^+\text{H}$ ] 188.0706; Found: 188.0702.

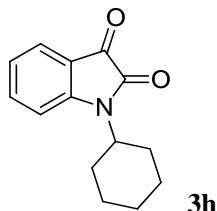

**1-cyclohexylindoline-2,3-dione (3h)**<sup>15</sup>: According to the general procedure, a mixture of **1h** (74 mg, 0.25 mmol), CuI (4.8 mg, 0.025 mmol, 10 mol%), 1,10-Phen (9 mg, 0.05 mmol, 20 mol%),  $\text{K}_2\text{CO}_3$  (104 mg, 0.75 mmol, 3 equiv), TBAB (113 mg, 0.35 mmol, 1.4 equiv) in *o*-xylene (2 mL) was stirred at 120 °C for 12 h gave **3h** (EtOAc/petroleum ether = 1:5) as a red solid (39 mg, 68%). M.p. 190-192 °C; IR (KBr,  $\text{cm}^{-1}$ ): 1745, 1733, 1615, 750;  $^1\text{H}$  NMR ( $\text{CDCl}_3$ , 500 MHz):  $\delta$  7.60-7.53 (m, 2H), 7.09-7.05 (m, 2H), 4.08-4.03 (m, 1H), 2.16-1.25 (m, 10H);  $^{13}\text{C}$  NMR ( $\text{CDCl}_3$ , 125 MHz):  $\delta$  183.9, 157.9, 151.0, 138.1, 125.6, 123.2, 117.9, 111.5, 53.1, 29.1, 25.8, 25.2; LC-MS (ESI)  $m/z$ : 230 [ $\text{M}^+\text{H}$ ].

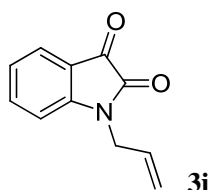

**1-allylindoline-2,3-dione (3i)**<sup>16</sup>: According to the general procedure, a mixture of **1i** (63.5 mg, 0.25 mmol), CuI (4.8 mg, 0.025 mmol, 10 mol%), 1,10-Phen (9 mg, 0.05 mmol, 20 mol%),  $\text{K}_2\text{CO}_3$  (104 mg, 0.75 mmol, 3 equiv), TBAB (113 mg, 0.35 mmol, 1.4 equiv) in toluene (2 mL) was stirred at 100 °C for 8 h gave **3i** (EtOAc/petroleum ether = 1:5) as a red solid (34 mg, 72%). M.p. 102-104 °C; IR (KBr,  $\text{cm}^{-1}$ ): 1729, 1606, 1469, 762;  $^1\text{H}$  NMR ( $\text{CDCl}_3$ , 500 MHz):  $\delta$  7.61-7.55 (m, 2H), 7.12 (t,  $J = 7.5$  Hz, 1H), 6.89 (d,  $J = 7.5$  Hz, 1H), 5.88-5.80 (m, 1H), 5.34-5.28 (m, 2H), 4.36 (d,  $J = 5.0$  Hz, 2H);  $^{13}\text{C}$  NMR ( $\text{CDCl}_3$ , 125 MHz):  $\delta$  183.2, 157.9, 150.8, 138.3, 130.4, 125.4, 123.8, 118.7, 117.6, 110.9, 42.5; MS (EI)  $m/z$  (%): 187 (63) [ $\text{M}^+$ ], 130 (100).

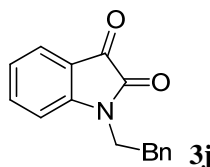

**1-phenethylindoline-2,3-dione (3j)**<sup>17</sup>: According to the general procedure, a mixture of **1j** (79.5 mg, 0.25 mmol), CuI (4.8 mg, 0.025 mmol, 10 mol%), 1,10-Phen (9 mg, 0.05 mmol, 20 mol%),  $\text{K}_2\text{CO}_3$  (104 mg, 0.75 mmol, 3 equiv), TBAB (113 mg, 0.35 mmol, 1.4 equiv) in toluene (2 mL) was stirred at 100 °C for 8 h gave **3j** (EtOAc/petroleum ether = 1:5) as a red solid (31 mg, 50%). M.p. 108-110 °C; IR (KBr,  $\text{cm}^{-1}$ ): 1732, 1604, 1467, 758;  $^1\text{H}$  NMR ( $\text{CDCl}_3$ , 500 MHz):  $\delta$  7.62 (d,  $J = 7.5$  Hz, 1H), 7.56 (t,  $J = 7.0$  Hz, 1H), 7.34-7.27 (m, 5H), 7.12 (t,  $J = 7.5$  Hz, 1H), 6.78 (d,  $J = 8.0$  Hz, 1H), 3.99 (t,  $J = 7.5$  Hz, 2H), 3.04 (t,  $J = 7.5$  Hz, 2H);  $^{13}\text{C}$  NMR ( $\text{CDCl}_3$ , 125 MHz):  $\delta$  183.4, 158.1, 150.9, 138.3, 137.6, 128.8, 128.8, 127.0, 125.5, 123.6, 117.5, 110.1, 41.8, 33.7; MS



(EI)  $m/z$  (%): 251 (45) [ $M^+$ ], 132(100).

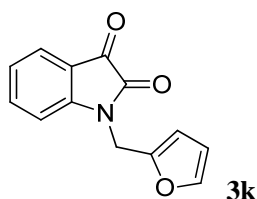

**1-(furan-2-ylmethyl)indoline-2,3-dione (3k)**<sup>18</sup>: According to the general procedure, a mixture of **1k** (73.5 mg, 0.25 mmol), CuI (4.8 mg, 0.025 mmol, 10 mol%), 1,10-Phen (9 mg, 0.05 mmol, 20 mol%), K<sub>2</sub>CO<sub>3</sub> (104 mg, 0.75 mmol, 3 equiv), TBAB (113 mg, 0.35 mmol, 1.4 equiv) in toluene (2 mL) was stirred at 100 °C for 4 h gave **3k** (EtOAc/petroleum ether = 1:5) as a red solid (39 mg, 69%). M.p. 136-138 °C; IR (KBr, cm<sup>-1</sup>): 1738, 1614, 1470, 1343, 760; <sup>1</sup>H NMR (CDCl<sub>3</sub>, 500 MHz): δ 7.59-7.55 (m, 2H), 7.35 (d, *J* = 1.0 Hz, 1H), 7.12-7.09 (m, 1H), 7.05(d, *J* = 8.0 Hz, 1H), 6.38 (d, *J* = 3.0 Hz, 1H), 6.33-6.32 (m, 1H), 4.89 (s, 2H); <sup>13</sup>C NMR (CDCl<sub>3</sub>, 500 MHz): δ 183.1, 157.8, 150.6, 148.1, 142.8, 138.4, 125.4, 123.9, 117.6, 110.9, 110.7, 109.3, 36.8; LC-MS (ESI)  $m/z$ : 228 [ $M^+H$ ].

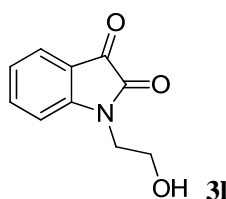

**1-(2-hydroxyethyl)indoline-2,3-dione (3l)**<sup>19</sup>: According to the general procedure, a mixture of compound **1l** (64.5 mg, 0.25 mmol), CuI (4.8 mg, 0.025 mmol, 10 mol%), 1,10-Phen (9 mg, 0.05 mmol, 20 mol%), K<sub>2</sub>CO<sub>3</sub> (104 mg, 0.75 mmol, 3 equiv), TBAB (113 mg, 0.35 mmol, 1.4 equiv) in toluene (2 mL) was stirred at 100 °C for 8 h gave **3l** (EtOAc/petroleum ether = 1:5) as a red solid (29 mg, 60%). M.p. 102-104 °C; IR (KBr, cm<sup>-1</sup>): 3442, 1055, 1028, 1008; <sup>1</sup>H NMR (*d*<sub>6</sub>-DMSO, 500 MHz): δ 7.65 (t, *J* = 7.5 Hz, 1H), 7.54 (d, *J* = 8.0 Hz, 1H), 7.21 (d, *J* = 8.0 Hz, 1H), 7.12 (t, *J* = 7.5 Hz, 1H), 3.75 (t, *J* = 5.5 Hz, 2H), 3.63 (t, *J* = 5.5 Hz, 2H); <sup>13</sup>C NMR (*d*<sub>6</sub>-DMSO, 125 MHz): δ 184.2, 158.8, 151.8, 138.5, 124.7, 123.4, 117.9, 111.6, 58.2, 42.9; LC-MS (ESI)  $m/z$ : 192 [ $M^+H$ ].

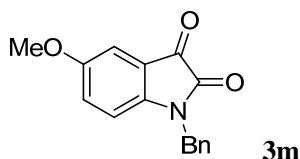

**1-benzyl-5-methoxyindoline-2,3-dione (3m)**<sup>20</sup>: According to the general procedure, a mixture of **1l** (84 mg, 0.25 mmol), CuI (4.8 mg, 0.025 mmol, 10 mol%), 1,10-Phen (9 mg, 0.05 mmol, 20 mol%), K<sub>2</sub>CO<sub>3</sub> (104 mg, 0.75 mmol, 3 equiv), TBAB (113 mg, 0.35 mmol, 1.4 equiv) in toluene (2 mL) was stirred at 100 °C for 6 h gave **3m** (EtOAc/petroleum ether = 1:5) as a brown solid (40 mg, 60%). M.p. 120-122 °C; IR (KBr, cm<sup>-1</sup>): 1723, 1621, 1437, 1271, 1080; <sup>1</sup>H NMR (CDCl<sub>3</sub>, 500 MHz): δ 7.34-7.29 (m, 5H), 7.14 (d, *J* = 2.5 Hz, 1H), 7.02 (dd, *J* = 9.0, 2.5 Hz, 1H), 6.67 (d, *J* = 8.5 Hz, 1H), 4.90 (s, 2H), 3.78 (s, 3H); <sup>13</sup>C NMR (CDCl<sub>3</sub>, 125 MHz): δ 183.7, 158.4, 156.6, 144.6, 134.6, 129.1, 128.1, 127.4, 124.7, 118.1, 112.1, 109.6, 56.0, 44.1; LC-MS (ESI)  $m/z$ : 268 [ $M^+H$ ].

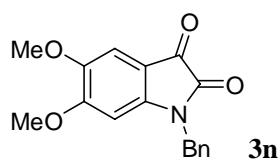

**1-benzyl-5,6-dimethoxyindoline-2,3-dione (3n):** According to the general procedure, a mixture of **1n** (91 mg, 0.25 mmol), CuI (4.8 mg, 0.025 mmol, 10 mol%), 1,10-Phen (9 mg, 0.05 mmol, 20 mol%), K<sub>2</sub>CO<sub>3</sub> (104 mg, 0.75 mmol, 3 equiv), TBAB (113 mg, 0.35 mmol, 1.4 equiv) in toluene (2 mL) was stirred at 100 °C for 6 h gave **3n** (EtOAc/petroleum ether = 1:5) as a brown solid (53 mg, 65%). M.p. 132-134 °C; IR (KBr, cm<sup>-1</sup>): 2928, 1734, 1618, 1245; <sup>1</sup>H NMR (CDCl<sub>3</sub>, 500 MHz): δ 7.37-7.30 (m, 5H), 7.11 (s, 1H), 6.25 (s, 1H), 4.91 (s, 2H), 3.84(s, 3H) , 3.84(s, 3H); <sup>13</sup>C NMR (CDCl<sub>3</sub>, 125 MHz): δ 180.9, 159.5, 158.2, 148.7, 145.9, 134.9, 129.1, 128.2, 127.3, 109.1, 107.5, 95.4, 56.6, 56.5, 43.9; LC-MS (ESI) m/z: 298 [M<sup>+</sup>H]; HRMS: m/z calcd for C<sub>17</sub>H<sub>15</sub>NO<sub>4</sub>: 297.1006; Found: 297.1001.

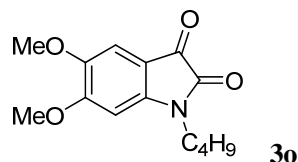

**1-butyl-5,6-dimethoxyindoline-2,3-dione (3o):** According to the general procedure, a mixture of **1o** (83 mg, 0.25 mmol), CuI (4.8 mg, 0.025 mmol, 10 mol%), 1,10-Phen (9 mg, 0.05 mmol, 20 mol%), K<sub>2</sub>CO<sub>3</sub> (104 mg, 0.75 mmol, 3 equiv), TBAB (113 mg, 0.35 mmol, 1.4 equiv) in toluene (2 mL) was stirred at 100 °C for 16 h gave **3o** (EtOAc/petroleum ether = 1:5) as a brown solid (30 mg, 46%). M.p. 130-132 °C; IR (KBr, cm<sup>-1</sup>): 2933, 1731, 1708, 1616, 1251; <sup>1</sup>H NMR (CDCl<sub>3</sub>, 500 MHz): δ 7.07 (s, 1H), 6.37 (s, 1H), 4.01 (s, 3H), 3.83 (s, 3H), 3.66 (t, *J* = 7.5 Hz, 2H), 1.67-1.61 (m, 2H), 1.41-1.36 (m, 2H), 0.94 (t, *J* = 7.5 Hz, 3H); <sup>13</sup>C NMR (CDCl<sub>3</sub>, 125 MHz): δ 181.3, 159.4, 158.4, 149.1, 145.7, 109.0, 107.6, 94.4, 56.8, 56.5, 39.7, 29.8, 20.1, 13.7; LC-MS (ESI) m/z: 264 [M<sup>+</sup>H]; HRMS: m/z calcd for C<sub>14</sub>H<sub>17</sub>NO<sub>4</sub>: 263.1160; Found: 263.1158.

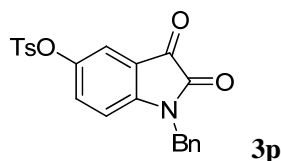

**1-benzyl-2,3-dioxindolin-5-yl-4-methylbenzenesulfonate (3p):** According to the general procedure, a mixture of **1p** (119 mg, 0.25 mmol), CuI (4.8 mg, 0.025 mmol, 10 mol%), 1,10-Phen (9 mg, 0.05 mmol, 20 mol%), K<sub>2</sub>CO<sub>3</sub> (104 mg, 0.75 mmol, 3 equiv), TBAB (113 mg, 0.35 mmol, 1.4 equiv) in toluene (2 mL) was stirred at 100 °C for 2 h gave **3p** (EtOAc/petroleum ether = 1:5) as a red solid (58 mg, 57%). M.p. 148-150 °C; IR (KBr, cm<sup>-1</sup>): 1740, 1613, 1478, 1378, 1175, 739; <sup>1</sup>H NMR (CDCl<sub>3</sub>, 500 MHz): δ 7.68 (d, *J* = 8.5 Hz, 2H), 7.37-7.29 (m, 7H), 7.20 (dd, *J* = 8.5, 2.5 Hz, 1H), 7.11 (d, *J* = 2.0 Hz, 1H), 6.73 (d, *J* = 8.5 Hz, 1H), 4.90 (s, 1H), 2.45 (s, 3H); <sup>13</sup>C NMR (CDCl<sub>3</sub>, 125 MHz): δ 182.2, 158.0, 149.1, 146.1, 145.7, 134.0, 132.5, 131.7, 130.1, 129.2, 128.5, 128.4, 127.5, 119.4, 117.9, 112.0, 44.3, 21.8; LC-MS (ESI) m/z: 408 [M<sup>+</sup>H]; HRMS: m/z calcd for C<sub>22</sub>H<sub>17</sub>NNaO<sub>5</sub>S: 430.0720; Found: 430.0730.

## 6. General Procedure for the Cu-catalyzed *N*-aryl substituted isatins synthesis

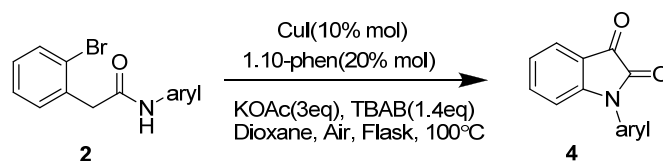

A 25 mL round bottom flask equipped with drying tube, a magnetic stirring bar, is charged with

2 mL of anhydrous dioxane, Compound **2** (0.25 mmol), CuI (4.8 mg, 0.025 mmol, 10 mol%), 1,10-Phen (9 mg, 0.05 mmol, 20 mol%), KOAc (74 mg, 0.75 mmol, 3 equiv), TBAB (113 mg, 0.35 mmol, 1.4 equiv). The mixture was stirred at 100 °C in an oil bath, and monitored by TLC. Upon completion, the reaction mixture was eluted with H<sub>2</sub>O (15 mL) and extracted with EtOAc (2×15 mL). The combined organic phase was washed with brine and dried over anhydrous Na<sub>2</sub>SO<sub>4</sub>. After that the organic phase was filtered, and the filtrate was evaporated in vacuum to give the crude product which was purified by column chromatography on silica gel using appropriate eluent.

## 7. Synthesis and characterization for *N*-aryl substituted isatins products

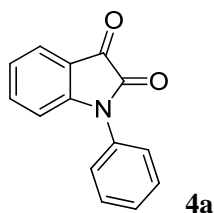

**1-phenylindoline-2,3-dione (4a)**<sup>21</sup>: According to the general procedure, a mixture of **2a** (75 mg, 0.25 mmol), CuI (4.8 mg, 0.025 mmol, 10 mol%), 1,10-Phen (9 mg, 0.05 mmol, 20 mol%), KOAc (74 mg, 0.75 mmol, 3 equiv), TBAB (113 mg, 0.35 mmol, 1.4 equiv) in dioxane (2 mL) was stirred at 100 °C for 10 h gave **4a** (EtOAc/petroleum ether = 1:5) as a red solid (42 mg, 75%). M.p. 85-87°C; IR (KBr, cm<sup>-1</sup>): 3451, 1741, 1610, 752; <sup>1</sup>H NMR (500 MHz, CDCl<sub>3</sub>): 7.71-7.69 (m, 1H), 7.59-7.53 (m, 3H), 7.49-7.41 (m, 3H), 7.18 (t, *J* = 7.5 Hz, 1H), 6.90 (d, *J* = 8.0 Hz, 1H); <sup>13</sup>C NMR (125 MHz, CDCl<sub>3</sub>): δ 183.0, 157.4, 151.8, 138.4, 133.0, 130.1, 129.0, 126.1, 125.7, 124.4, 117.6, 111.4; MS (EI) *m/z* (%): 223 (23) [M<sup>+</sup>], 195 (100), 167 (30), 161 (15), 77 (17).

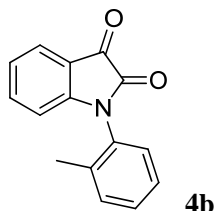

**1-(*o*-tolyl)indoline-2,3-dione (4b)**<sup>22</sup>: According to the general procedure, a mixture of **2b** (76 mg, 0.25 mmol), CuI (4.8 mg, 0.025 mmol, 10 mol%), 1,10-Phen (9 mg, 0.05 mmol, 20 mol%), KOAc (74 mg, 0.75 mmol, 3 equiv), TBAB (113 mg, 0.35 mmol, 1.4 equiv) in dioxane (2 mL) was stirred at 100 °C for 10 h gave **4b** (EtOAc/petroleum ether = 1:5) as a red solid (28 mg, 47%). M.p. 107-109 °C; IR (KBr, cm<sup>-1</sup>): 3456, 2923, 1736, 1605, 752; <sup>1</sup>H NMR (500 MHz, CDCl<sub>3</sub>): 7.73 (dd, *J* = 7.5, 0.5 Hz, 1H), 7.54 (td, *J* = 8.0, 1.5 Hz, 1H), 7.44-7.37 (m, 3H), 7.29-7.28 (m, 1H), 7.20-7.17 (m, 1H), 6.58 (d, *J* = 8.0 Hz, 1H), 2.26 (s, 3H); <sup>13</sup>C NMR (125 MHz, CDCl<sub>3</sub>): δ 183.1, 157.3, 152.0, 138.5, 136.4, 131.9, 131.7, 129.8, 127.6, 127.6, 125.6, 124.2, 117.5, 111.3, 18.0; MS (EI) *m/z* (%): 237 (47) [M<sup>+</sup>], 209 (100), 181 (10), 180 (62), 90 (12).

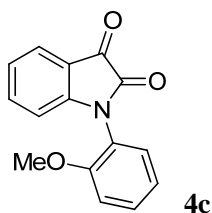

**1-(2-methoxyphenyl)indoline-2,3-dione (4c)**<sup>23</sup>: According to the general procedure, a mixture of **2c** (80 mg, 0.25 mmol), CuI (4.8 mg, 0.025 mmol, 10 mol%), 1,10-Phen (9 mg, 0.05 mmol, 20 mol%), KOAc (74 mg, 0.75 mmol, 3 equiv), TBAB (113 mg, 0.35 mmol, 1.4 equiv) in dioxane (2 mL) was stirred at 100 °C for 10 h gave **4c** (EtOAc/petroleum ether = 1:5) as a red solid (30 mg, 47%). M.p. 122-126 °C; IR (KBr, cm<sup>-1</sup>): 3457, 2924, 1738, 1608, 755; <sup>1</sup>H NMR (500 MHz, CDCl<sub>3</sub>): 7.68-7.66 (m, 1H), 7.51-7.44 (m, 2H), 7.32 (dd, *J* = 7.5, 1.5 Hz, 1H), 7.14-7.08 (m, 3H), 6.57 (d, *J* = 8.0 Hz, 1H), 3.80 (s, 3H); <sup>13</sup>C NMR (125 MHz, CDCl<sub>3</sub>): δ 183.1, 157.7, 155.2, 152.3, 138.2, 130.9, 129.1, 125.2, 123.8, 121.3, 121.2, 117.6, 112.6, 111.5, 55.8; MS (EI) *m/z* (%): 253 (45) [M<sup>+</sup>], 225 (38), 224 (100), 196 (68), 195 (43), 154 (18).

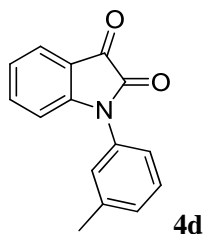

**1-(m-tolyl)indoline-2,3-dione (4d)**: According to the general procedure, a mixture of **2d** (76 mg, 0.25 mmol), CuI (4.8 mg, 0.025 mmol, 10 mol%), 1,10-Phen (9 mg, 0.05 mmol, 20 mol%), KOAc (74 mg, 0.75 mmol, 3 equiv), TBAB (113 mg, 0.35 mmol, 1.4 equiv) in dioxane (2 mL) was stirred at 100 °C for 10 h gave **4d** (EtOAc/petroleum ether = 1:5) as a red solid (36 mg, 61%). M.p. 136-138 °C; IR (KBr, cm<sup>-1</sup>): 1729, 1604, 1466, 759; <sup>1</sup>H NMR (CDCl<sub>3</sub>, 500 MHz): δ 7.69 (d, *J* = 7.5 Hz, 1H), 7.57-7.54 (m, 1H), 7.45 (t, *J* = 7.5 Hz, 1H), 7.29-7.16 (m, 4H), 6.90 (d, *J* = 8.0 Hz, 1H), 2.45 (s, 3H); <sup>13</sup>C NMR (CDCl<sub>3</sub>, 125 MHz): δ 183.0, 157.4, 151.9, 140.2, 138.4, 132.8, 129.8, 129.7, 126.6, 125.5, 124.2, 123.0, 117.5, 111.4, 21.4; LC-MS (ESI) *m/z*: 238 [M<sup>+</sup>H]; HRMS: *m/z* calcd for C<sub>15</sub>H<sub>11</sub>NNaO<sub>2</sub>: 260.0682; Found: 260.0674.

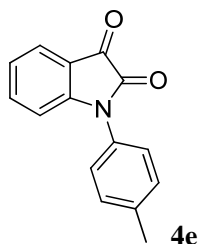

**1-(p-tolyl)indoline-2,3-dione (4e)**<sup>21</sup>: According to the general procedure, a mixture of **2e** (76 mg, 0.25 mmol), CuI (4.8 mg, 0.025 mmol, 10 mol%), 1,10-Phen (9 mg, 0.05 mmol, 20 mol%), KOAc (74 mg, 0.75 mmol, 3 equiv), TBAB (113 mg, 0.35 mmol, 1.4 equiv) in dioxane (2 mL) was stirred at 100 °C for 10 h gave **4e** (EtOAc/petroleum ether = 1:5) as a red solid (38 mg, 64%). M.p. 125-126 °C; IR (KBr, cm<sup>-1</sup>): 3443, 2923, 1738, 1611; <sup>1</sup>H NMR (500 MHz, CDCl<sub>3</sub>): 7.68 (d, *J* = 6.5 Hz, 1H), 7.53 (td, *J* = 7.5, 1.5 Hz, 1H), 7.35 (AA' of AA'BB', *J* = 8.0 Hz, 2H), 7.29 (BB' of AA'BB', *J* = 8.0 Hz, 2H), 7.16 (t, *J* = 7.5 Hz, 1H), 6.87 (d, *J* = 8.0 Hz, 1H), 2.43 (s, 3H); <sup>13</sup>C NMR (125 MHz, CDCl<sub>3</sub>): δ 183.1, 157.5, 151.9, 139.0, 138.3, 130.6, 130.2, 125.9, 125.6, 124.2,

117.5, 111.3, 21.3; MS (EI)  $m/z$  (%): 237 (25) [ $M^+$ ], 210 (16), 209 (100), 180 (37), 65 (12).

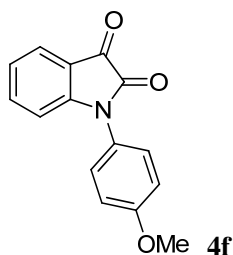

**1-(4-methoxyphenyl)indoline-2,3-dione (4f)**<sup>21</sup>: According to the general procedure, a mixture of **2f** (80 mg, 0.25 mmol), CuI (4.8 mg, 0.025 mmol, 10 mol%), 1,10-Phen (9 mg, 0.05 mmol, 20 mol%), KOAc (74 mg, 0.75 mmol, 3 equiv), TBAB (113 mg, 0.35 mmol, 1.4 equiv) in dioxane (2 mL) was stirred at 100 °C for 10 h gave **4f** (EtOAc/petroleum ether = 1:5) as a red solid (41 mg, 64%). M.p. 117-118 °C; IR (KBr,  $cm^{-1}$ ): 3450, 2425, 2853, 1610; <sup>1</sup>H NMR (CDCl<sub>3</sub>, 500 MHz): 7.67 (d,  $J = 7.5$  Hz, 1H), 7.53 (td,  $J = 8.0, 1.0$  Hz, 1H), 7.31 (AA' of AA'BB',  $J = 8.5$  Hz, 2H), 7.15 (t,  $J = 7.5$  Hz, 1H), 7.05 (BB' of AA'BB',  $J = 8.5$  Hz, 2H), 6.82 (d,  $J = 8.0$  Hz, 1H), 3.86 (s, 3H); <sup>13</sup>C NMR (CDCl<sub>3</sub>, 125 MHz):  $\delta$  183.2, 159.7, 157.7, 152.1, 138.4, 127.5, 125.5, 125.4, 124.2, 117.5, 115.2, 111.2, 55.6; MS (EI)  $m/z$  (%): 253 (43) [ $M^+$ ], 225 (100), 210 (43), 185 (37), 183 (47), 182 (74), 154 (23), 149 (23), 122 (20).

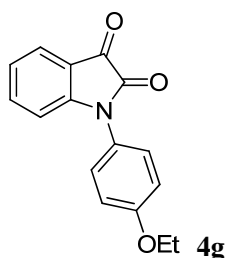

**1-(4-ethoxyphenyl)indoline-2,3-dione (4g)**: According to the general procedure, a mixture of **2g** (84 mg, 0.25 mmol), CuI (4.8 mg, 0.025 mmol, 10 mol%), 1,10-Phen (9 mg, 0.05 mmol, 20 mol%), KOAc (74 mg, 0.75 mmol, 3 equiv), TBAB (113 mg, 0.35 mmol, 1.4 equiv) in dioxane (2 mL) was stirred at 100 °C for 10 h gave **4g** (EtOAc/petroleum ether = 1:5) as a red solid (42 mg, 62%). M.p. 84-86 °C; IR (KBr,  $cm^{-1}$ ): 3451, 2969, 1736, 1616, 1510, 1247; <sup>1</sup>H NMR (CDCl<sub>3</sub>, 500 MHz): 7.67-7.65 (m, 1H), 7.52 (td,  $J = 7.5, 1.5$  Hz, 1H), 7.15 (AA' of AA'BB',  $J = 8.5$  Hz, 2H), 7.14 (td,  $J = 7.5, 1.0$  Hz, 1H), 7.03 (BB' of AA'BB',  $J = 8.5$  Hz, 2H), 6.82 (d,  $J = 8.0$  Hz, 1H), 4.07 (q,  $J = 7.0$  Hz, 2H), 1.44 (t,  $J = 7.0$  Hz, 3H); <sup>13</sup>C NMR (CDCl<sub>3</sub>, 125 MHz):  $\delta$  183.2, 159.1, 157.7, 152.1, 138.4, 127.4, 125.5, 125.1, 124.2, 117.4, 115.7, 111.2, 63.9, 14.8; MS (EI)  $m/z$  (%): 267 (8) [ $M^+$ ], 253 (24), 185 (21), 183 (20), 167 (24), 163 (32), 149 (100), 57 (58); HRMS:  $m/z$  calcd for C<sub>16</sub>H<sub>13</sub>NNaO<sub>3</sub>: 290.0788; Found: 290.0775.

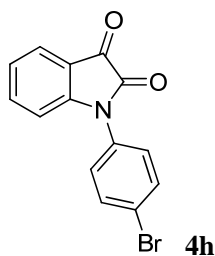

**1-(4-bromophenyl)indoline-2,3-dione (4h)**<sup>21</sup>: According to the general procedure, a mixture of

**2h** (92 mg, 0.25 mmol), CuI (4.8 mg, 0.025 mmol, 10 mol%), 1,10-Phen (9 mg, 0.05 mmol, 20 mol%), KOAc (74 mg, 0.75 mmol, 3 equiv), TBAB (113 mg, 0.35 mmol, 1.4 equiv) in dioxane (2 mL) was stirred at 100 °C for 12 h gave **4h** (EtOAc/petroleum ether = 1:5) as a red solid (25 mg, 33%). M.p. 155-156 °C; IR (KBr, cm<sup>-1</sup>): 1735, 1611, 1463, 756; <sup>1</sup>H NMR (CDCl<sub>3</sub>, 500 MHz): δ 7.71-7.68 (m, 3H), 7.56 (t, *J* = 7.5 Hz, 1H), 7.32 (d, *J* = 8.5 Hz, 2H), 7.19 (t, *J* = 7.5 Hz, 1H), 6.90 (d, *J* = 8.0 Hz, 1H); <sup>13</sup>C NMR (CDCl<sub>3</sub>, 125 MHz): δ 182.4, 157.2, 151.1, 138.4, 133.2, 131.9, 127.6, 125.8, 124.6, 122.5, 117.6, 111.1; LC-MS (ESI) *m/z*: 304 [M<sup>+</sup> (<sup>81</sup>Br)], 302 [M<sup>+</sup> (<sup>79</sup>Br)].

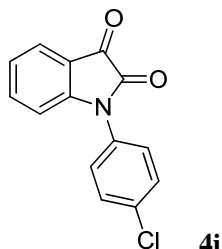

**1-(4-chlorophenyl)indoline-2,3-dione (4i)**<sup>21</sup>: According to the general procedure, a mixture of **2j** (81 mg, 0.25 mmol), CuI (4.8 mg, 0.025 mmol, 10 mol%), 1,10-Phen (9 mg, 0.05 mmol, 20 mol%), KOAc (74 mg, 0.75 mmol, 3 equiv), TBAB (113 mg, 0.35 mmol, 1.4 equiv) in dioxane (2 mL) was stirred at 100 °C for 12 h gave **4i** (EtOAc/petroleum ether = 1:5) as a red solid (22 mg, 34%). M.p. 196-198 °C; IR (KBr, cm<sup>-1</sup>): 3462, 2924, 2854, 1739, 1610, 1494, 1464; <sup>1</sup>H NMR (CDCl<sub>3</sub>, 500 MHz): 7.72-7.70 (m, 1H), 7.58-7.53 (m, 3H), 7.38 (d, *J* = 9.0 Hz, 2H), 7.20 (t, *J* = 7.5 Hz, 1H), 6.89 (d, *J* = 8.0 Hz, 1H); <sup>13</sup>C NMR (CDCl<sub>3</sub>, 125 MHz): δ 182.4, 157.2, 151.2, 138.4, 134.6, 130.2, 127.3, 125.8, 124.6, 121.1, 117.6, 111.1; MS (EI) *m/z* (%): 259 (7) [M<sup>+</sup> (<sup>37</sup>Cl)], 257 (18) [M<sup>+</sup> (<sup>35</sup>Cl)], 231 (34), 229 (100), 194 (61), 183 (16), 166 (41), 149 (49), 111 (24), 75 (29).

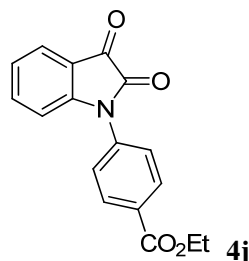

**ethyl 4-(2,3-dioxoindolin-1-yl)benzoate (4j)**<sup>21</sup>: According to the general procedure, a mixture of **2j** (91 mg, 0.25 mmol), CuI (4.8 mg, 0.025 mmol, 10 mol%), 1,10-Phen (9 mg, 0.05 mmol, 20 mol%), KOAc (74 mg, 0.75 mmol, 3 equiv), TBAB (113 mg, 0.35 mmol, 1.4 equiv) in dioxane (2 mL) was stirred at 100 °C for 12 h gave **4j** (EtOAc/petroleum ether = 1:5) as a red solid (17 mg, 23%). M.p. 110-112 °C; IR (KBr, cm<sup>-1</sup>): 1744, 1718, 1613, 1291, 1281, 766, 745; <sup>1</sup>H NMR (CDCl<sub>3</sub>, 500 MHz): δ 8.24 (d, *J* = 8.5 Hz, 2H), 7.73 (d, *J* = 7.5 Hz, 1H), 7.59-7.53 (m, 3H), 7.21 (t, *J* = 7.5 Hz, 1H), 6.97 (d, *J* = 8.0 Hz, 1H), 4.42 (q, *J* = 7.0 Hz, 2H), 1.42 (t, *J* = 7.0 Hz, 3H); <sup>13</sup>C NMR (CDCl<sub>3</sub>, 125 MHz): δ 182.6, 165.5, 157.0, 150.9, 138.4, 136.8, 131.2, 130.6, 125.9, 125.5, 124.7, 117.7, 111.3, 61.4, 14.3; LC-MS (ESI) *m/z*: 296 [M<sup>+</sup>H].

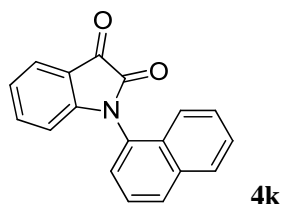

**1-(naphthalen-1-yl)indoline-2,3-dione (4k)**<sup>21</sup>: According to the general procedure, a mixture of **2k** (85 mg, 0.25 mmol), CuI (4.8 mg, 0.025 mmol, 10 mol%), 1,10-Phen (9 mg, 0.05 mmol, 20 mol%), KOAc (74 mg, 0.75 mmol, 3 equiv), TBAB (113 mg, 0.35 mmol, 1.4 equiv) in dioxane (2 mL) was stirred at 100 °C for 6 h gave **4k** (EtOAc/petroleum ether = 1:5) as a red solid (41 mg, 61%). M.p. 148-150 °C; IR (KBr, cm<sup>-1</sup>): 1738, 1607, 1467, 776, 756; <sup>1</sup>H NMR (CDCl<sub>3</sub>, 500 MHz): δ 8.01(d, *J* = 8.2 Hz, 1H), 7.97 (d, *J* = 8.2 Hz, 1H), 7.74 (d, *J* = 7.5 Hz, 1H), 7.70 (d, *J* = 8.0 Hz, 1H), 7.63-7.49 (m, 4H), 7.44 (t, *J* = 7.5 Hz, 1H), 7.17 (t, *J* = 7.5 Hz, 1H), 6.43 (t, *J* = 7.5 Hz, 1H); <sup>13</sup>C NMR (CDCl<sub>3</sub>, 125 MHz): δ 183.0, 158.1, 152.7, 138.6, 134.9, 130.2, 129.4, 128.9, 127.5, 127.0, 126.0, 125.9, 125.5, 124.3, 122.4, 117.5, 111.8; LC-MS (ESI) *m/z*: 274 [M<sup>+</sup>H].

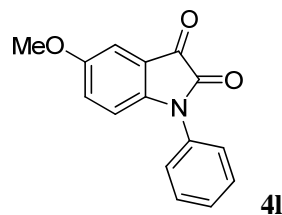

**5-methoxy-1-phenylindoline-2,3-dione (4l)**<sup>24</sup>: According to the general procedure, a mixture of compound **2l** (80 mg, 0.25 mmol), CuI (4.8 mg, 0.025 mmol, 10 mol%), 1,10-Phen (9 mg, 0.05 mmol, 20 mol%), KOAc (74 mg, 0.75 mmol, 3 equiv), TBAB (113 mg, 0.35 mmol, 1.4 equiv) in Dioxane (2 mL) was stirred at 100 °C for 6 h gave **4l** (EtOAc/petroleum ether = 1:5) as a red solid (32 mg, 51%). M.p. 149-150 °C; IR (KBr, cm<sup>-1</sup>): 1734, 1722, 1490, 1287; <sup>1</sup>H NMR (CDCl<sub>3</sub>, 500 MHz): δ 7.54 (t, *J* = 7.5 Hz, 2H), 7.44-7.40 (m, 3H), 7.20 (d, *J* = 2.5 Hz, 1H), 7.09 (dd, *J* = 8.5, 2.5 Hz, 1H), 6.84 (d, *J* = 8.5 Hz, 1H), 3.82 (s, 3H); <sup>13</sup>C NMR (CDCl<sub>3</sub>, 125 MHz): δ 183.3, 157.4, 156.8, 145.7, 133.1, 129.9, 128.6, 125.7, 125.0, 117.9, 112.4, 109.2, 56.0; LC-MS (ESI) *m/z*: 254 [M<sup>+</sup>H].

## 8. Mechanism Study

### Tracing the isolated yields of compounds **3i** and **5** during the reaction:

Following the same procedure as for **4a** with **1i** (64 mg, 0.25 mmol), CuI (4.8 mg, 0.025 mmol, 10 mol%), 1,10-Phen (9 mg, 0.05 mmol, 20 mol%), KOAc (74 mg, 0.75 mmol, 3 equiv), TBAB (113 mg, 0.35 mmol, 1.4 equiv) in dioxane (2 mL) was stirred at 100 °C for 12 h. Compounds **3i** (18 mg) and **5** (23 mg) were isolated in 38% and 34% yield, respectively.

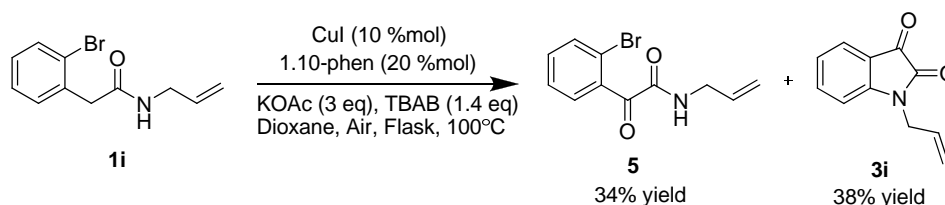

**N-allyl-2-(2-bromophenyl)-2-oxoacetamide (5)**: yellow oil; IR (KBr, cm<sup>-1</sup>): 3400, 1736, 1681, 1524, 1211, 758; <sup>1</sup>H NMR (CDCl<sub>3</sub>, 500 MHz): δ 7.64-7.63 (m, 2H), 7.43-7.36 (m, 2H), 7.10 (br, 1H), 5.94-5.86 (m, 1H), 5.32-5.21 (m, 2H), 4.03-4.01 (m, 2H); <sup>13</sup>C NMR (CDCl<sub>3</sub>, 125 MHz): δ 190.6, 160.2, 135.9, 133.6, 133.0, 132.8, 131.2, 127.1, 120.9, 117.5, 42.0; LC-MS (ESI) *m/z*: 270 [M<sup>+</sup>H (<sup>81</sup>Br)], 268 [M<sup>+</sup>H (<sup>79</sup>Br)]; HRMS: *m/z* calcd for C<sub>11</sub>H<sub>10</sub>NNaO<sub>2</sub>: 289.9787; Found: 289.9785.

### Synthesis of compound **3i** from intermediate **5**:

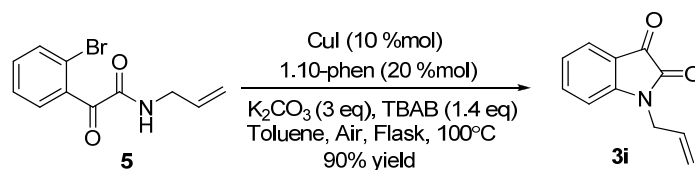

Following the same procedure as for **3a** with **5** (40 mg, 0.15 mmol), CuI (5.6 mg, 0.015 mmol, 10 mol%), 1,10-Phen (11.2 mg, 0.03 mmol, 20 mol%), K<sub>2</sub>CO<sub>3</sub> (63 mg, 0.45 mmol, 3 equiv), TBAB (68 mg, 0.21 mmol, 1.4 equiv) in toluene (2 mL) was stirred at 100 °C for 4 h. The reaction gave **3i** (25 mg, 90%) as a red solid.

### Tracing the isolated yields of compound **4a** and **6** during the reaction:

Following the same procedure as for **4a** with **2a** (100 mg, 0.35 mmol), CuI (6.7 mg, 0.035 mmol, 10 mol%), 1,10-Phen (12.6 mg, 0.07 mmol, 20 mol%), KOAc (103 mg, 1.05 mmol, 3 equiv), TBAB (158 mg, 0.49 mmol, 1.4 equiv) in dioxane (4 mL) was stirred at 80 °C for 4 h. Compounds **4a** (16 mg) and **6** (75 mg) were isolated in 20% and 70% yield, respectively.

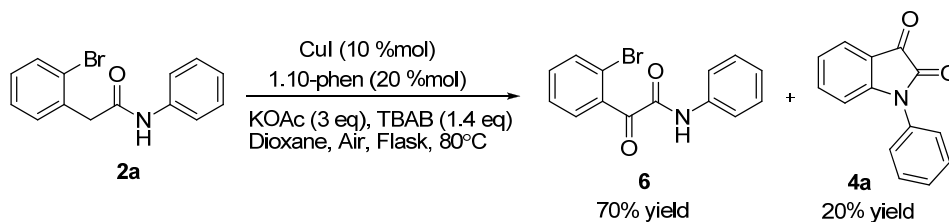

**2-(2-bromophenyl)-2-oxo-N-phenylacetamide (6)**: white solid, M.p. 80-82 °C; IR (KBr, cm<sup>-1</sup>): 3320, 1708, 1664, 1599, 1533, 1283, 758; <sup>1</sup>H NMR (CDCl<sub>3</sub>, 500 MHz): δ 8.86 (br, 1H), 7.71-7.66 (m, 4H), 7.45-7.38 (m, 4H), 7.20 (t, *J* = 7.5 Hz, 1H); <sup>13</sup>C NMR (CDCl<sub>3</sub>, 125 MHz): δ 190.8, 157.6, 136.5, 135.7, 133.6, 133.2, 131.2, 129.3, 127.2, 125.5, 121.0, 119.9; LC-MS (ESI) *m/z*: 306 [M<sup>+</sup>H (<sup>81</sup>Br)], 304 [M<sup>+</sup>H (<sup>79</sup>Br)]; HRMS: *m/z* calcd for C<sub>14</sub>H<sub>10</sub>BrNNaO<sub>2</sub>: 325.9787; Found: 325.9786.

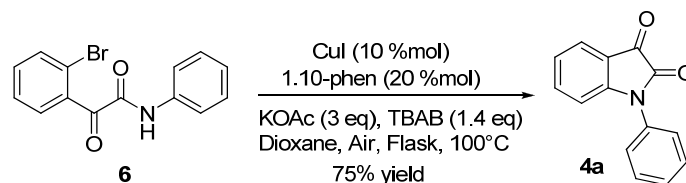

Following the same procedure as for **4a** with **6** (36 mg, 0.12 mmol), CuI (2.3 mg, 0.012 mmol, 10 mol%), 1,10-Phen (4.3 mg, 0.024 mmol, 20 mol%), KOAc (35 mg, 0.36 mmol, 3 equiv), TBAB (54 mg, 0.17 mmol, 1.4 equiv) in dioxane (2 mL) was stirred at 100 °C for 8 h. The reaction gave **4a** (20 mg, 75%) as a red solid.

### References:

1. S. G. Sudrik, S. P. Chavan, K. R. S. Chandrakumar, S. Pal, S. K. Date, S. P. Chavan and H. R. Sonawane, *J. Org. Chem.*, 2002, **67**, 1574.



2. Y. H. Kim, H. Lee, Y. J. Kim, B. T. Kim and J.-N. Heo, *J. Org. Chem.*, 2007, **73**, 495.
3. V. A. Ignatenko, N. Deligonul and R. Viswanathan, *Org. Lett.*, 2010, **12**, 3594.
4. B. Xu, S. Wang, J. Gu, H. Lin, CN101024619A, 2007.
5. M. Lafrance, N. Blaquiere and K. Fagnou, *Eur. J. Org. Chem.*, 2007, 811.
6. J. W. Corse, R. G. Jones, Q. F. Soper, C. W. Whitehead and O. K. Behrens, *J. Am. Chem. Soc.*, 1948, **70**, 2837.
7. N. Campbell and J. E. McKail, *J. Chem. Soc.*, 1948, 1251.
8. S. S. Jenkins and E. M. Richardson, *J. Am. Chem. Soc.*, 1933, **55**, 1618.
9. J. M. Ellis, L. E. Overman, H. R. Tanner and J. Wang, *J. Org. Chem.*, 2008, **73**, 9151.
10. R. J. Barbuch and N. P. Peet, *Org. Mass Spectrom.*, 1987, **22**, 59.
11. P. Diaz, J. Xu, F. Astruc-Diaz, H.-M. Pan, D. L. Brown and M. Naguib, *J. Med. Chem.*, 2008, **51**, 4932.
12. M. Shmidt, A. Reverdito, L. Kremenchuzky, I. Perillo and M. Blanco, *Molecules*, 2008, **13**, 831.
13. R. Shimazawa, M. Kuriyama and R. Shirai, *Bioorg. Med. Chem. Lett.*, 2008, **18**, 3350.
14. X.-H. Xu, X. Wang, G.-k. Liu, E. Tokunaga and N. Shibata, *Org. Lett.*, 2012, **14**, 2544.
15. E. G. Mesropyan, G. B. Ambartsumyan, A. A. Avetisyan and M. G. Sarkisyan, *Russ. J. Org. Chem.*, 2003, **39**, 1132.
16. B.-X. Tang, R.-J. Song, C.-Y. Wu, Y. Liu, M.-B. Zhou, W.-T. Wei, G.-B. Deng, D.-L. Yin and J.-H. Li, *J. Am. Chem. Soc.*, 2010, **132**, 8900.
17. I. P. Romanova, G. R. Shaikhutdinova, G. G. Yusupova, A. V. Bogdanov, L. I. Musin, D. G. Yakhvarov, M. I. Valitov, I. R. Nizameev, V. F. Mironov and O. G. Sinyashin, *Russ Chem Bull*, 2011, **60**, 867.
18. H. Moeller, D. Oberkobusch and H. Hoeffkes, *Eur. Pat. Appl.* EP1300133A2, 2003
19. G. Chen, M. Meng, Y. Tang and X. J. Hao, *Heterocycl. Commun.* 2010, **16**, 137.
20. D. J. Vyas, R. Fröhlich and M. Oestreich, *J. Org. Chem.*, 2010, **75**, 6720.
21. D. C. Rogness and R. C. Larock, *J. Org. Chem.*, 2011, **76**, 4980.
22. J. E. Dombrowski and P. G. Mattingly, *Eur. Pat. Appl.* EP369344A1, 1990.
23. H. B. Maurice, R. Phillips and N. Karodia, *Afr. J. Pharm. Pharmacol.* 2009, **3**, 602.
24. G. M. Coppola, *J. Heterocycl. Chem.*, 1987, **24**, 1249.

SUNJ-3-38  
PROTON CDC13 D:\\ deng 22

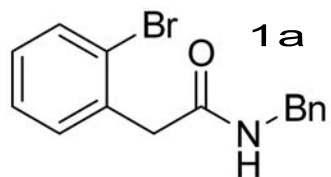

7.615  
7.613  
7.599  
7.597  
7.400  
7.397  
7.385  
7.382  
7.341  
7.328  
7.313  
7.289  
7.286  
7.274  
7.269  
7.255  
7.253  
7.239  
7.199  
7.196  
7.183  
7.181  
7.168  
7.165  
5.833  
4.466  
4.454  
3.790

NAME XB20120523  
EXPNO 4  
PROCNO 1  
Date\_ 20120523  
Time 9.53  
INSTRUM spect  
PROBHD 5 mm PATXO 19F  
PULPROG zg30  
TD 65536  
SOLVENT CDC13  
NS 8  
DS 2  
SWH 10330.578 Hz  
FIDRES 0.157632 Hz  
AQ 3.1720407 sec  
RG 203.2  
DW 48.400 usec  
DE 6.00 usec  
TE 294.8 K  
D1 1.00000000 sec  
TDO 1

===== CHANNEL f1 =====  
NUC1 1H  
P1 13.72 usec  
PL1 1.00 dB  
SF01 500.1330885 MHz  
SI 32768  
SF 500.1300000 MHz  
WDW no  
SSB 0  
LB 0.00 Hz  
GB 0  
PC 1.00

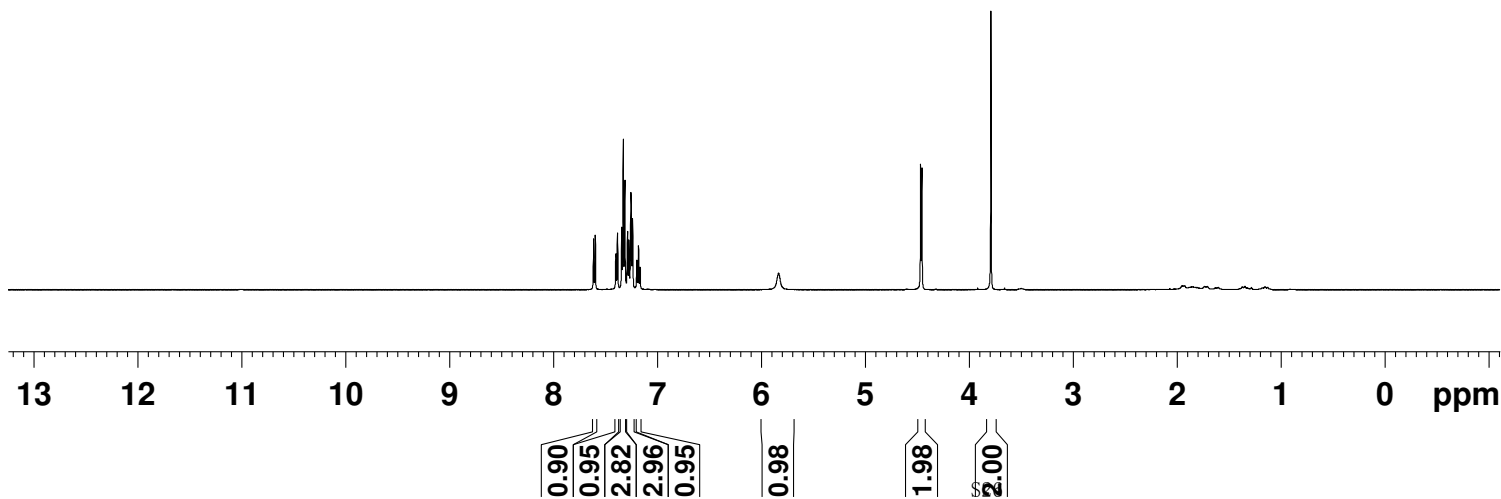

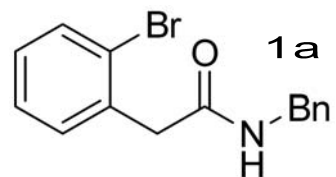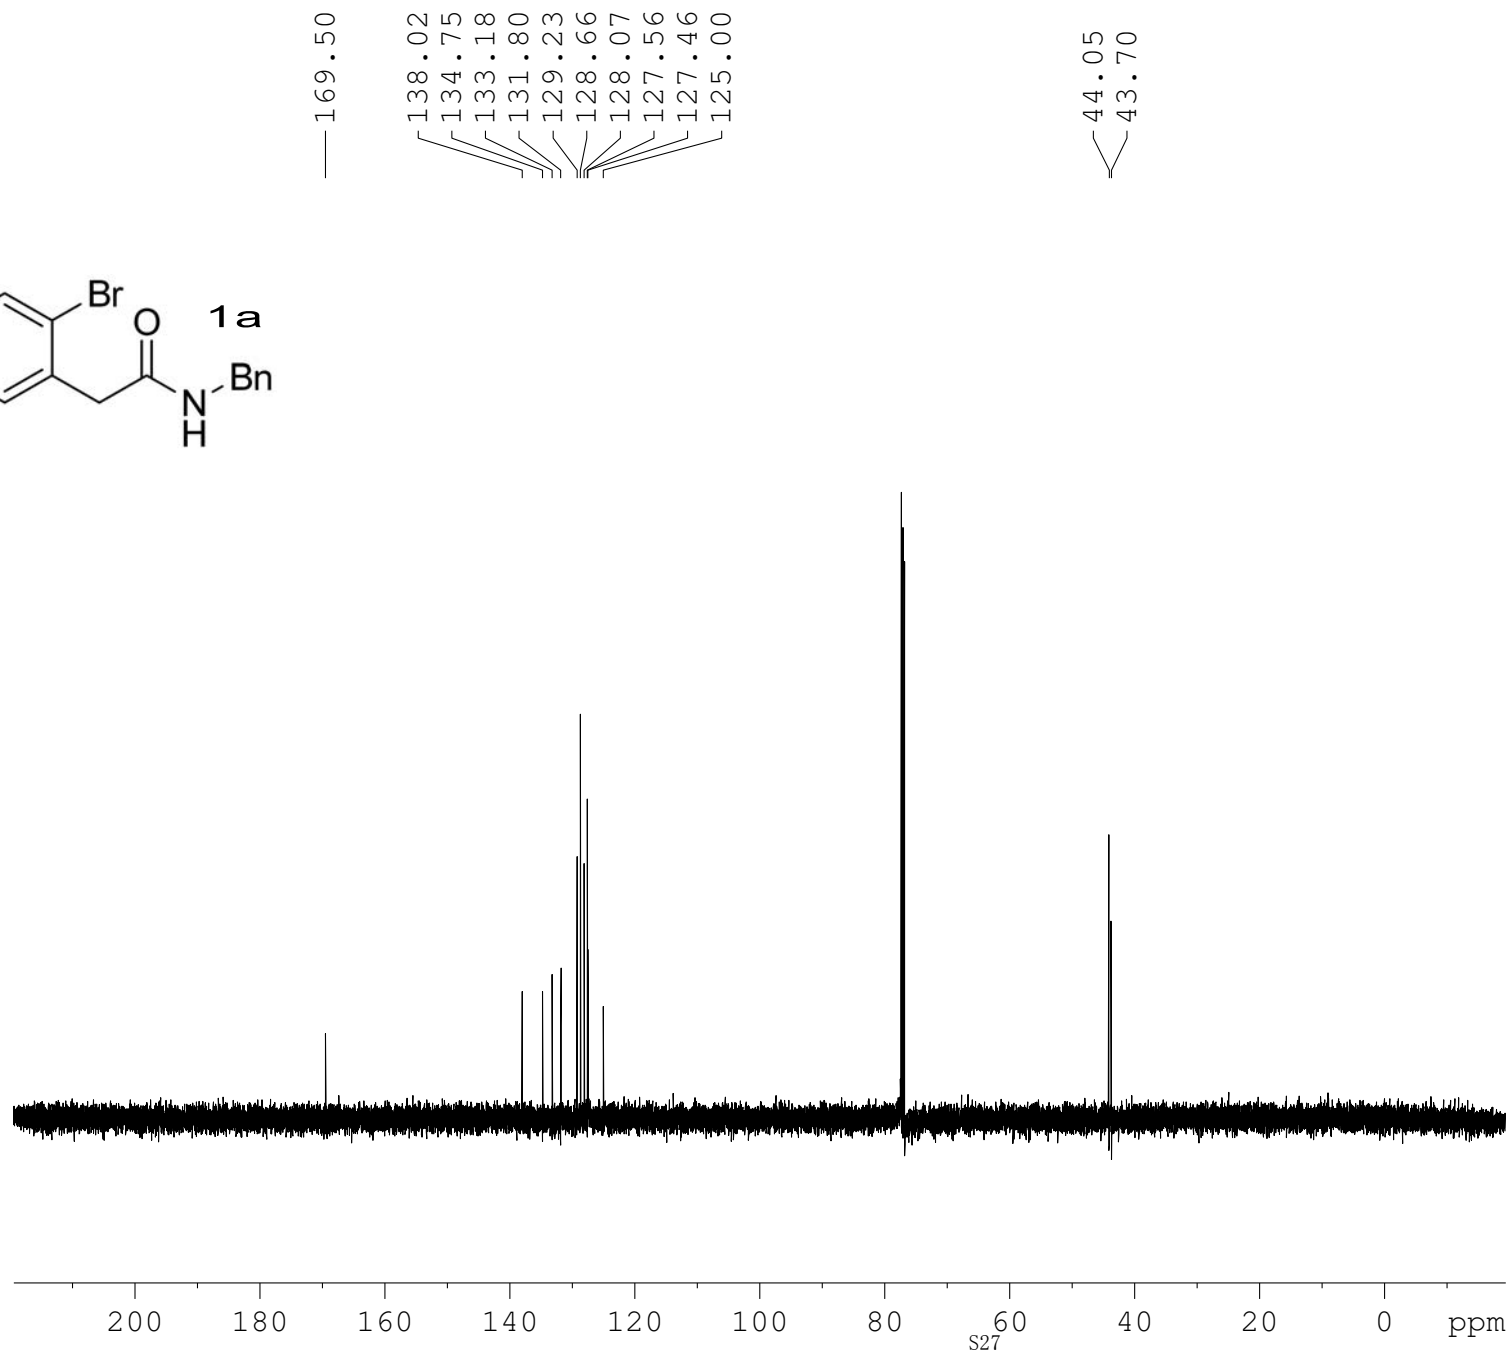

SUNJ-3-38  
C13CPD CDC13 D:\\ deng 22

NAME XB20120523  
EXPNO 5  
PROCNO 1  
Date\_ 20120523  
Time 10.01  
INSTRUM spect  
PROBHD 5 mm PATXO 19F  
PULPROG zgpg30  
TD 65536  
SOLVENT CDC13  
NS 128  
DS 4  
SWH 30030.029 Hz  
FIDRES 0.458222 Hz  
AQ 1.0912410 sec  
RG 203.2  
DW 16.650 usec  
DE 6.00 usec  
TE 295.9 K  
D1 2.00000000 sec  
d11 0.03000000 sec  
DELTA 1.89999998 sec  
TD0 1

==== CHANNEL f1 =====  
NUC1 13C  
P1 9.50 usec  
PL1 -0.50 dB  
SFO1 125.7703643 MHz

==== CHANNEL f2 =====  
CPDPRG2 waltz16  
NUC2 1H  
PCPD2 80.00 usec  
PL2 1.00 dB  
PL12 16.31 dB  
PL13 16.50 dB  
SFO2 500.1320005 MHz  
SI 32768  
SF 125.7577890 MHz  
WDW no  
SSB 0  
LB 0.00 Hz  
GB 0  
PC 1.40

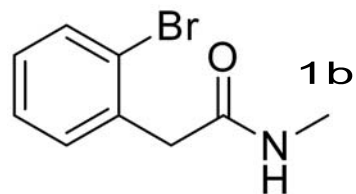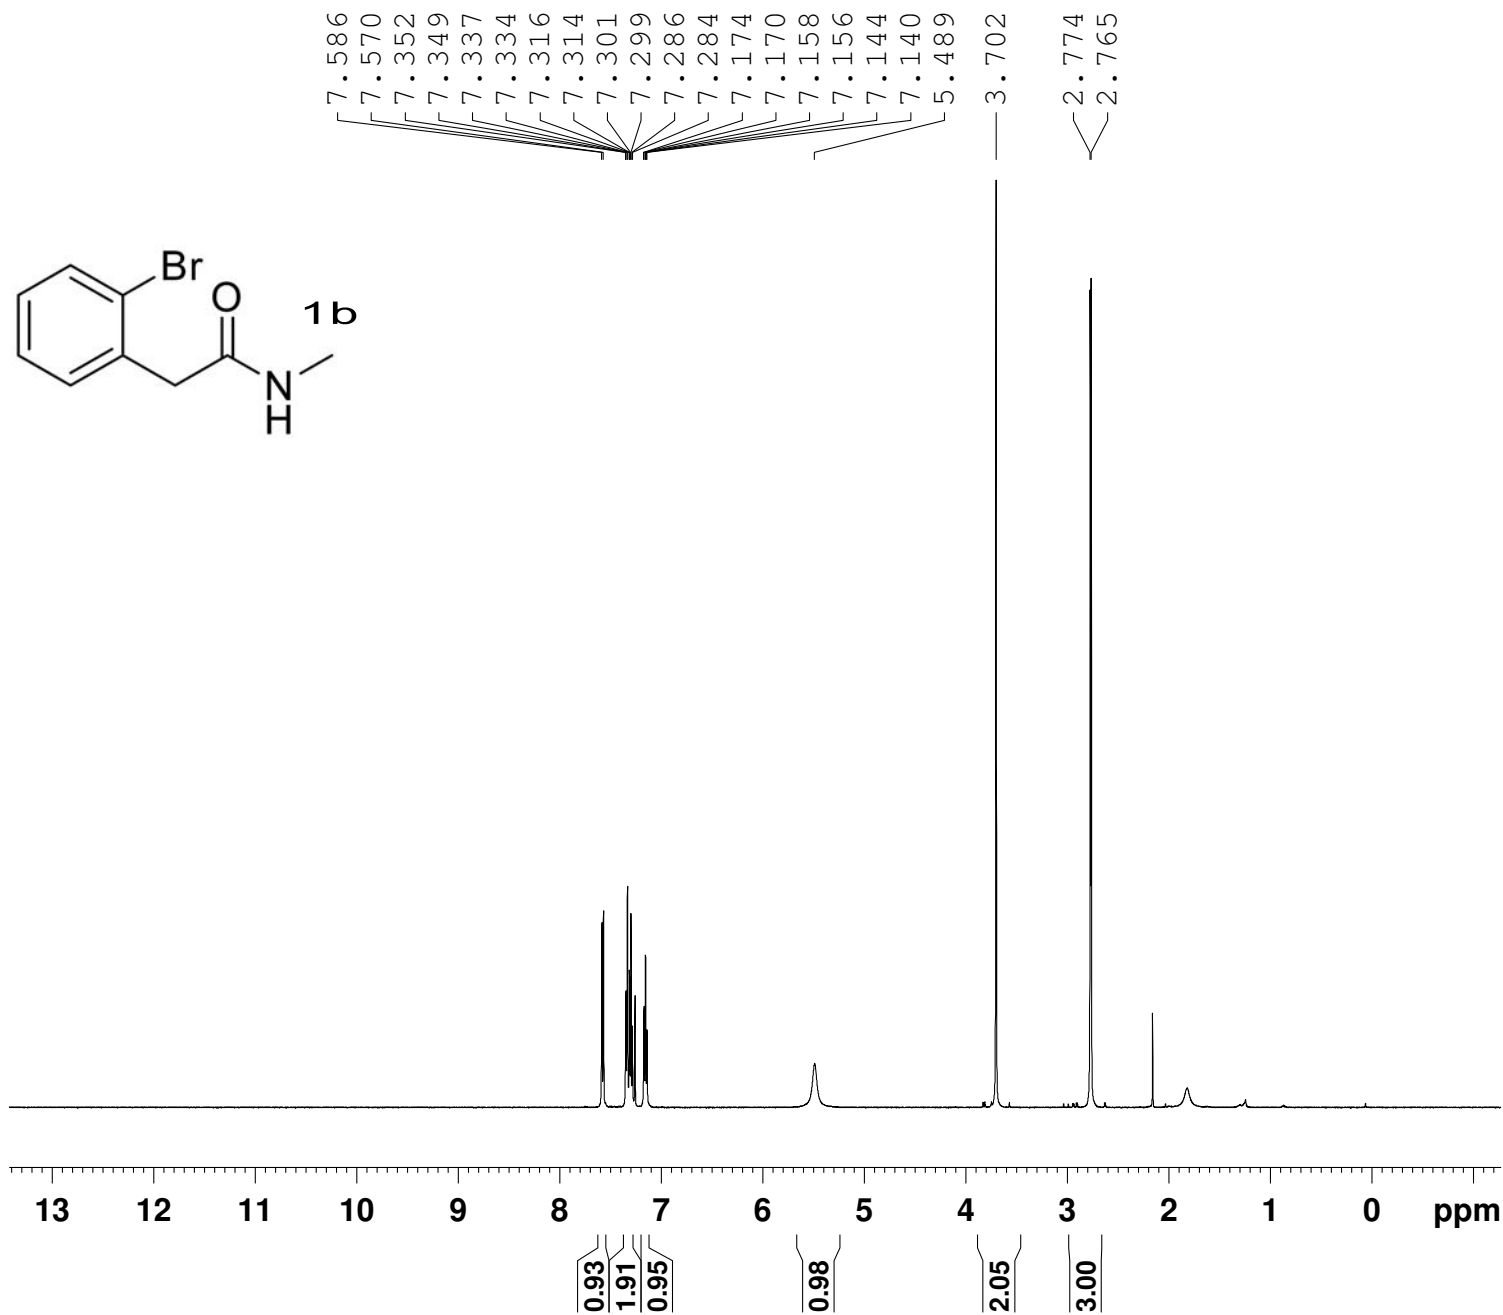

SunJ-1-254-1  
PROTON CDC13 D:\\ deng 10

```
NAME sunjie
EXPNO 3
PROCNO 1
Date_ 20110909
Time 10.37
INSTRUM spect
PROBHD 5 mm PATXO 19F
PULPROG zg30
TD 65536
SOLVENT CDC13
NS 8
DS 2
SWH 10330.578 Hz
FIDRES 0.157632 Hz
AQ 3.1720407 sec
RG 203.2
DW 48.400 usec
DE 6.00 usec
TE 296.7 K
D1 1.00000000 sec
TD0 1
```

```
===== CHANNEL f1 =====
NUC1 1H
P1 13.76 usec
PL1 1.00 dB
SFO1 500.1330885 MHz
SI 32768
SF 500.1300130 MHz
WDW no
SSB 0
LB 0.00 Hz
GB 0
PC 1.00
```

SunJ-1-254-1  
C13CPD CDC13 D:\ deng 10

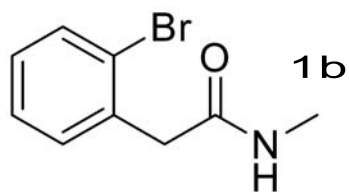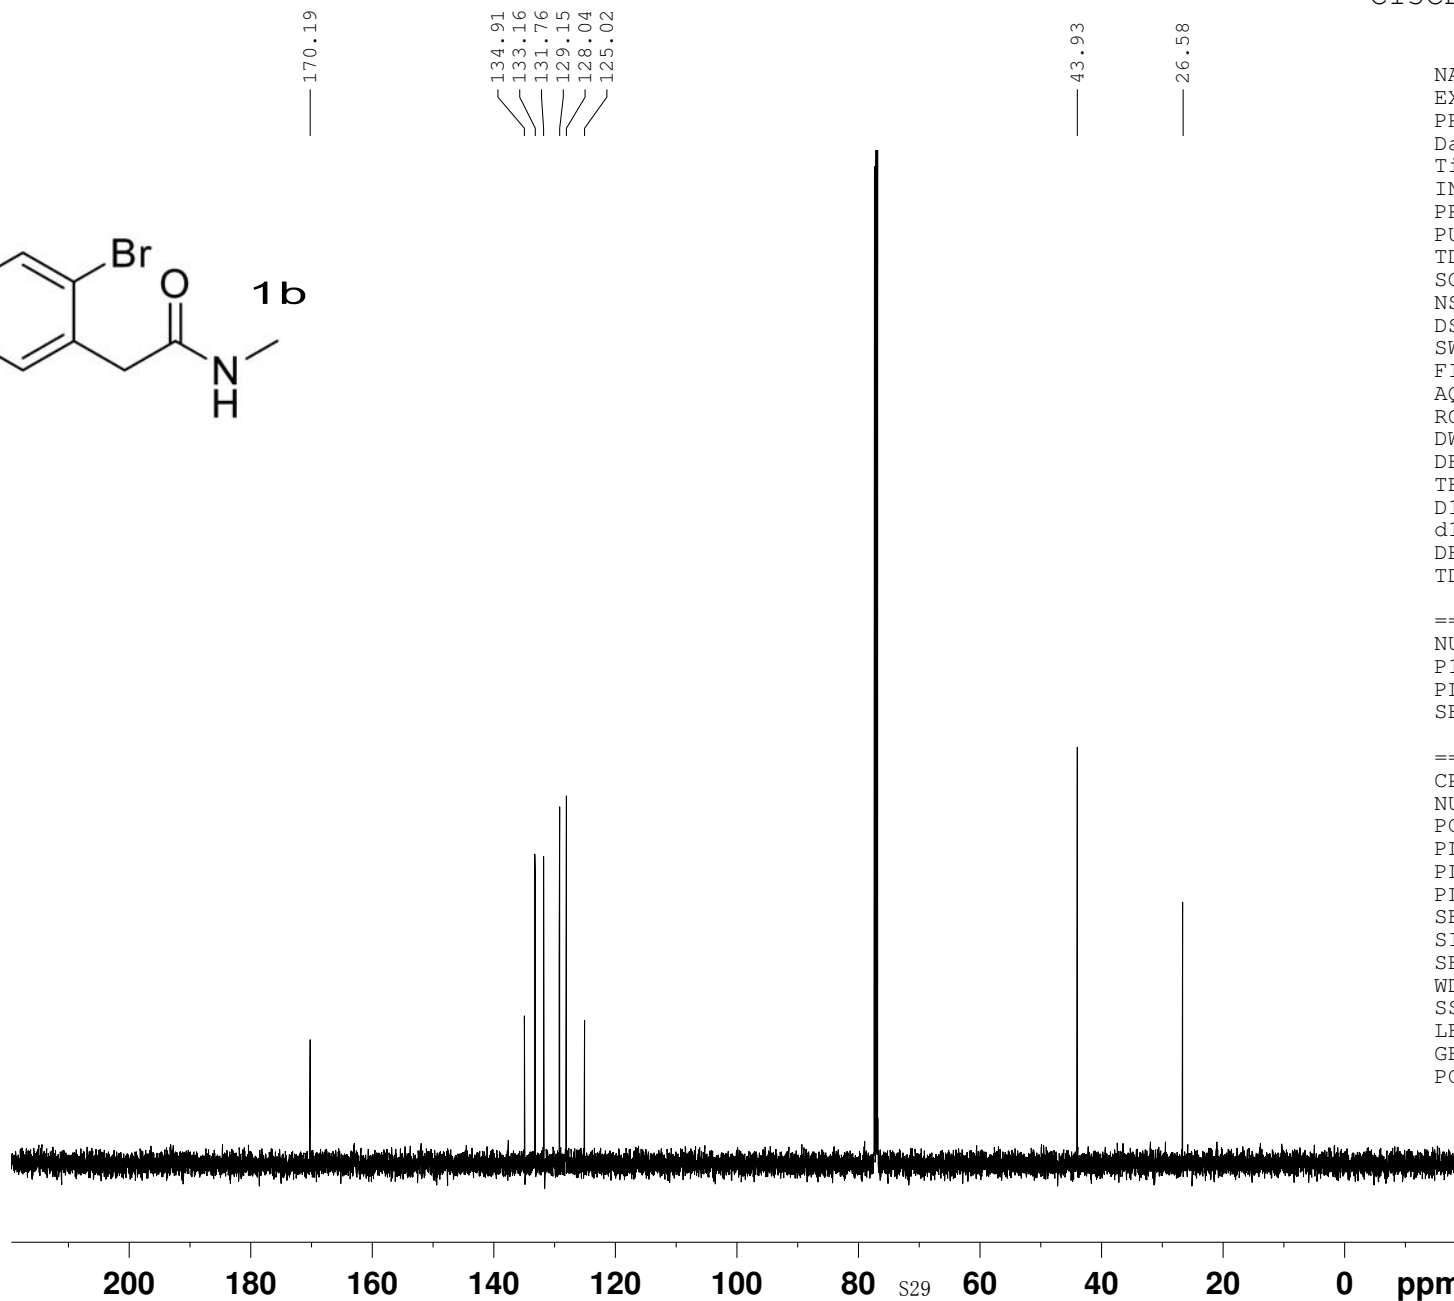

```
NAME sunjie
EXPNO 5
PROCNO 1
Date_ 20110909
Time 10.47
INSTRUM spect
PROBHD 5 mm PATXO 19F
PULPROG zgpg30
TD 65536
SOLVENT CDC13
NS 128
DS 4
SWH 30030.029 Hz
FIDRES 0.458222 Hz
AQ 1.0912410 sec
RG 143.7
DW 16.650 usec
DE 6.00 usec
TE 298.0 K
D1 2.00000000 sec
d11 0.03000000 sec
DELTA 1.89999998 sec
TD0 1
```

```
===== CHANNEL f1 =====
NUC1 13C
P1 9.50 usec
PL1 -0.50 dB
SFO1 125.7703643 MHz
```

```
===== CHANNEL f2 =====
CPDPRG2 waltz16
NUC2 1H
PCPD2 80.00 usec
PL2 2.00 dB
PL12 16.50 dB
PL13 16.50 dB
SFO2 500.1320005 MHz
SI 32768
SF 125.7577890 MHz
WDW EM
SSB 0
LB 1.00 Hz
GB 0
PC 1.40
```

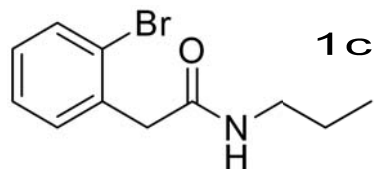

7.594  
 7.578  
 7.358  
 7.346  
 7.343  
 7.321  
 7.306  
 7.291  
 7.179  
 7.176  
 7.163  
 7.161  
 7.148  
 7.145  
 — 5.450

3.700  
 3.204  
 3.190  
 3.177  
 3.164

1.500  
 1.485  
 1.471  
 1.456  
 1.442  
 1.427  
 0.866  
 0.851  
 0.836

SunJ-1-254-2  
 PROTON CDC13 D:\\ deng 55

```

NAME      XUBIN20110909
EXPNO     1
PROCNO    1
Date_     20110909
Time      9.13
INSTRUM   spect
PROBHD    5 mm PATXO 19F
PULPROG   zg30
TD         65536
SOLVENT   CDC13
NS         16
DS         2
SWH       10330.578 Hz
FIDRES    0.157632 Hz
AQ         3.1720407 sec
RG         228.1
DW         48.400 usec
DE         6.00 usec
TE         296.2 K
D1         1.00000000 sec
TDO        1
    
```

```

===== CHANNEL f1 =====
NUC1      1H
P1         13.76 usec
PL1        1.00 dB
SFO1      500.1330885 MHz
SI         32768
SF         500.1300130 MHz
WDW        no
SSB        0
LB         0.00 Hz
GB         0
PC         1.00
    
```

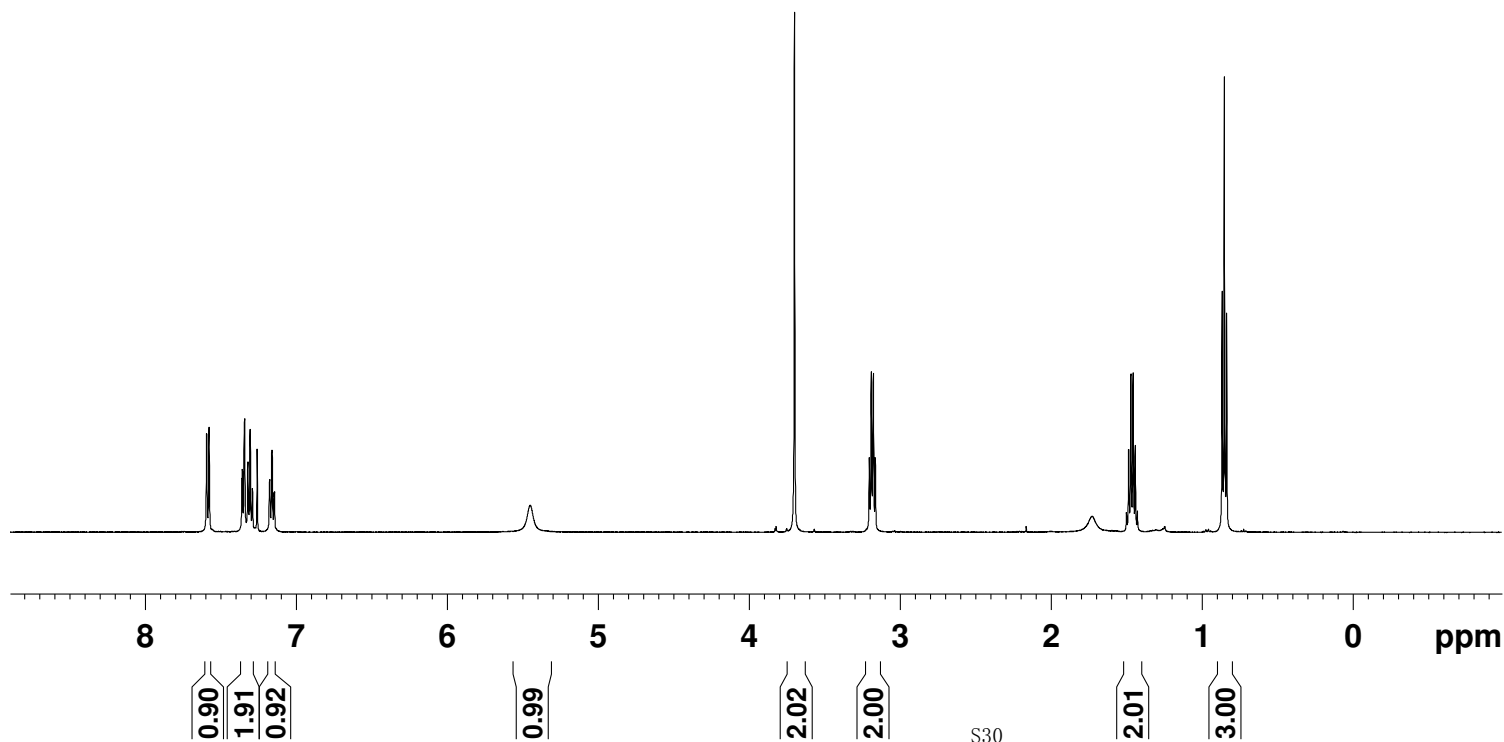

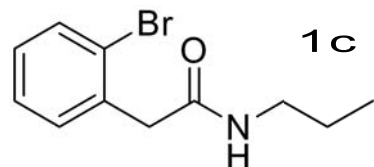

1c

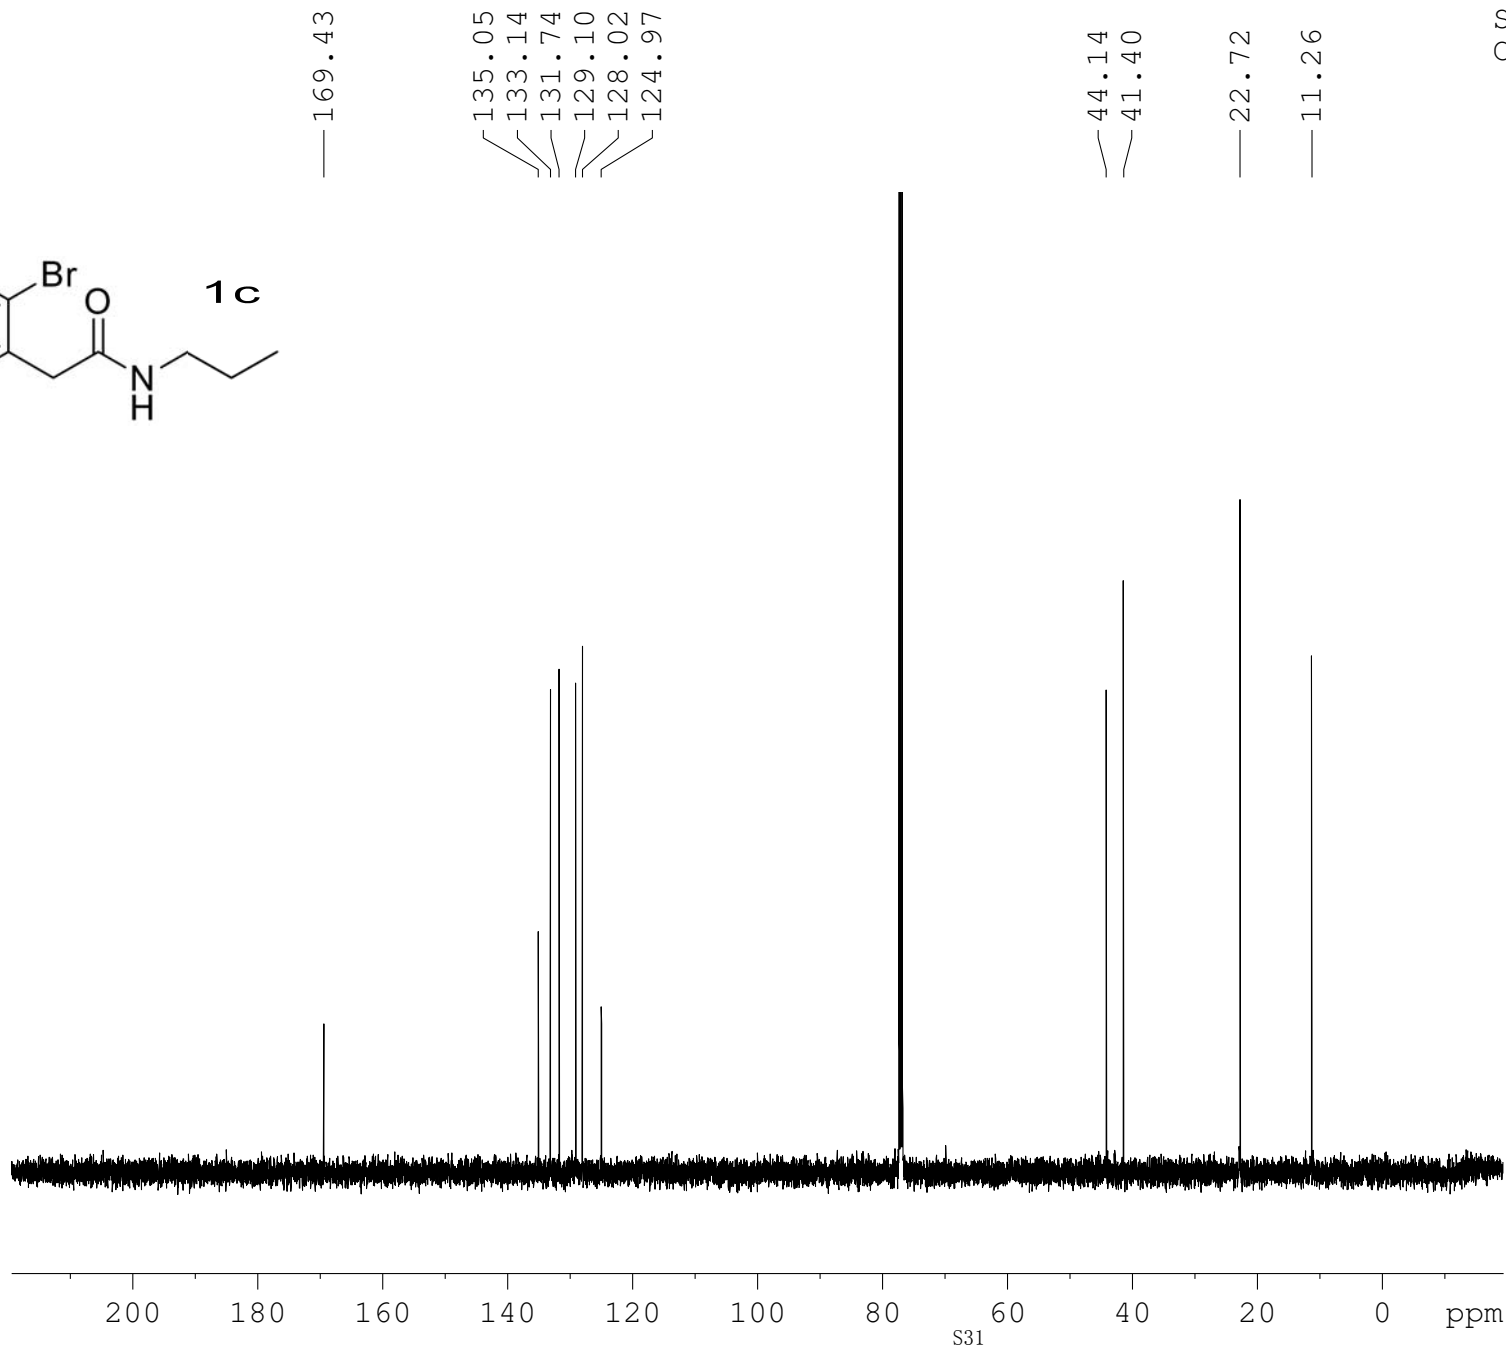

SUNJ-1-254-2  
C13CPD CDC13 D:\\ deng 44

```
NAME          SUNJ
EXPNO          6
PROCNO         1
Date_          20110915
Time           17.32
INSTRUM        spect
PROBHD         5 mm PATXO 19F
PULPROG        zgpg30
TD             65536
SOLVENT        CDC13
NS             256
DS             4
SWH            30030.029 Hz
FIDRES         0.458222 Hz
AQ            1.0912410 sec
RG            101.6
DW            16.650 usec
DE            6.00 usec
TE            298.7 K
D1            2.00000000 sec
d11           0.03000000 sec
DELTA         1.89999998 sec
TD0           1
```

```
===== CHANNEL f1 =====
NUC1           13C
P1             9.50 usec
PL1           -0.50 dB
SFO1          125.7703643 MHz
```

```
===== CHANNEL f2 =====
CPDPRG2        waltz16
NUC2            1H
PCPD2          80.00 usec
PL2            2.00 dB
PL12           16.50 dB
PL13           16.50 dB
SFO2          500.1320005 MHz
SI             32768
SF            125.7577890 MHz
WDW            EM
SSB            0
LB             1.00 Hz
GB             0
PC             1.40
```

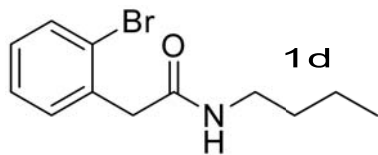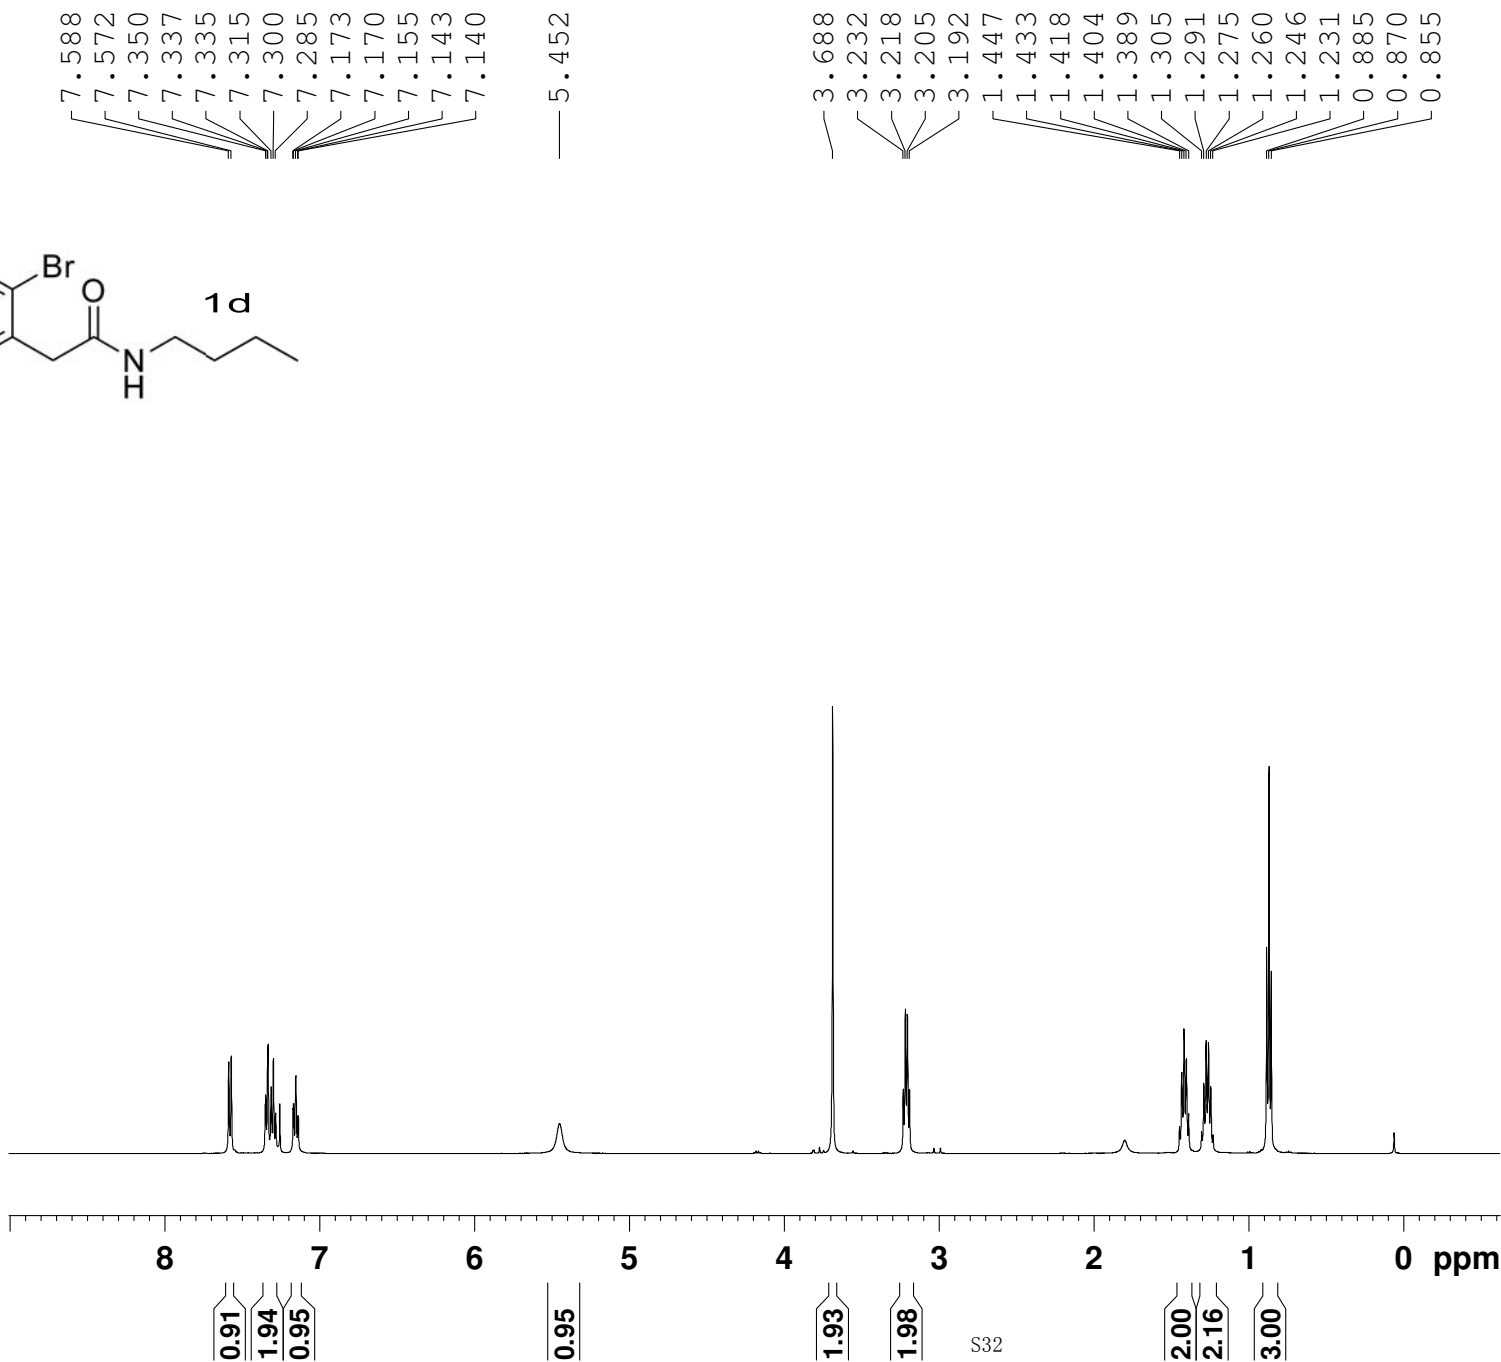

SUNJ1-272-1  
 PROTON CDCl3 D:\ \ deng 4

```

NAME          xb20110920
EXPNO         1
PROCNO        1
Date_         20110920
Time          9.26
INSTRUM       spect
PROBHD        5 mm PATXO 19F
PULPROG       zg30
TD            65536
SOLVENT       CDCl3
NS            8
DS            2
SWH           10330.578 Hz
FIDRES        0.157632 Hz
AQ            3.1720407 sec
RG            181
DW            48.400 usec
DE            6.00 usec
TE            295.6 K
D1            1.00000000 sec
TD0           1
    
```

```

===== CHANNEL f1 =====
NUC1          1H
P1            13.76 usec
PL1           1.00 dB
SFO1         500.1330885 MHz
SI            32768
SF           500.1300133 MHz
WDW           EM
SSB           0
LB            0.30 Hz
GB            0
PC            1.00
    
```



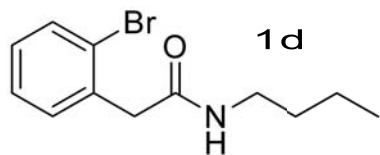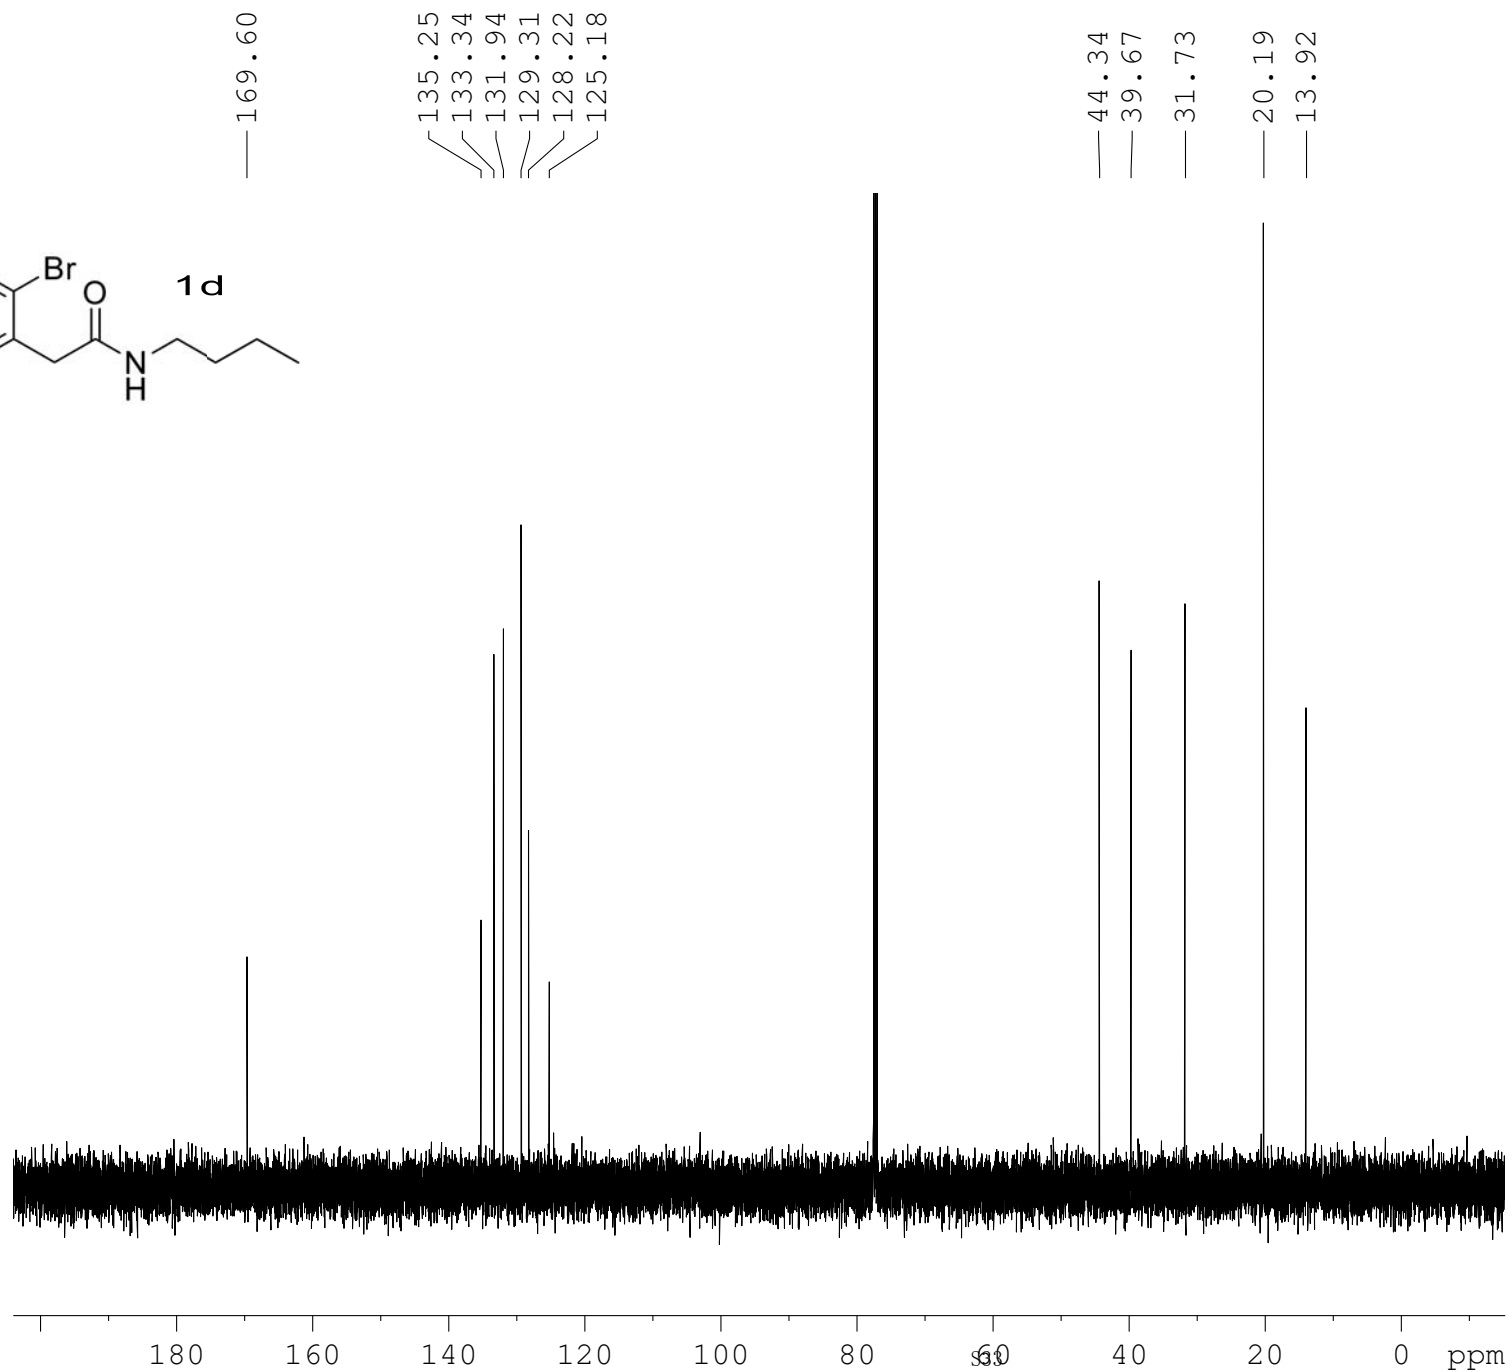

SUNJ-1-272  
C13CPD CDC13 D:\\ deng 5

```
NAME          xb20110923
EXPNO         41
PROCNO        1
Date_         20110923
Time          14.50
INSTRUM       spect
PROBHD        5 mm PATXO 19F
PULPROG       zgpg30
TD            65536
SOLVENT       CDC13
NS            128
DS            4
SWH           30030.029 Hz
FIDRES        0.458222 Hz
AQ            1.0912410 sec
RG            161.3
DW            16.650 usec
DE            6.00 usec
TE            297.9 K
D1            2.00000000 sec
d11           0.03000000 sec
DELTA         1.89999998 sec
TD0           1
```

```
===== CHANNEL f1 =====
NUC1          13C
P1            9.50 usec
PL1           -0.50 dB
SFO1          125.7703643 MHz
```

```
===== CHANNEL f2 =====
CPDPRG2       waltz16
NUC2          1H
PCPD2         80.00 usec
PL2           2.00 dB
PL12          16.50 dB
PL13          16.50 dB
SFO2          500.1320005 MHz
SI            32768
SF            125.7577628 MHz
WDW           no
SSB           0
LB            0.00 Hz
GB            0
PC            1.40
```

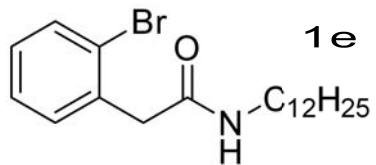

7.593  
7.579  
7.577  
7.357  
7.345  
7.342  
7.321  
7.319  
7.304  
7.291  
7.289  
7.177  
7.174  
7.161  
7.159  
7.147  
7.144  
5.424

3.695  
3.226  
3.212  
3.199  
3.186

1.440  
1.427  
1.414  
1.293  
1.279  
1.244  
1.226  
0.890  
0.876  
0.862

SUNJ-1-262  
PROTON CDC13 D:\ deng

NAME xb20110916  
EXPNO 11  
PROCNO 1  
Date\_ 20110916  
Time 18.04  
INSTRUM spect  
PROBHD 5 mm PATXO 19F  
PULPROG zg30  
TD 65536  
SOLVENT CDC13  
NS 16  
DS 2  
SWH 10330.578 Hz  
FIDRES 0.157632 Hz  
AQ 3.1720407 sec  
RG 143.7  
DW 48.400 usec  
DE 6.00 usec  
TE 297.5 K  
D1 1.00000000 sec  
TDO 1

==== CHANNEL f1 =====  
NUC1 1H  
P1 13.76 usec  
PL1 1.00 dB  
SF01 500.1330885 MHz  
SI 32768  
SF 500.1300130 MHz  
WDW no  
SSB 0  
LB 0.00 Hz  
GB 0  
PC 1.00

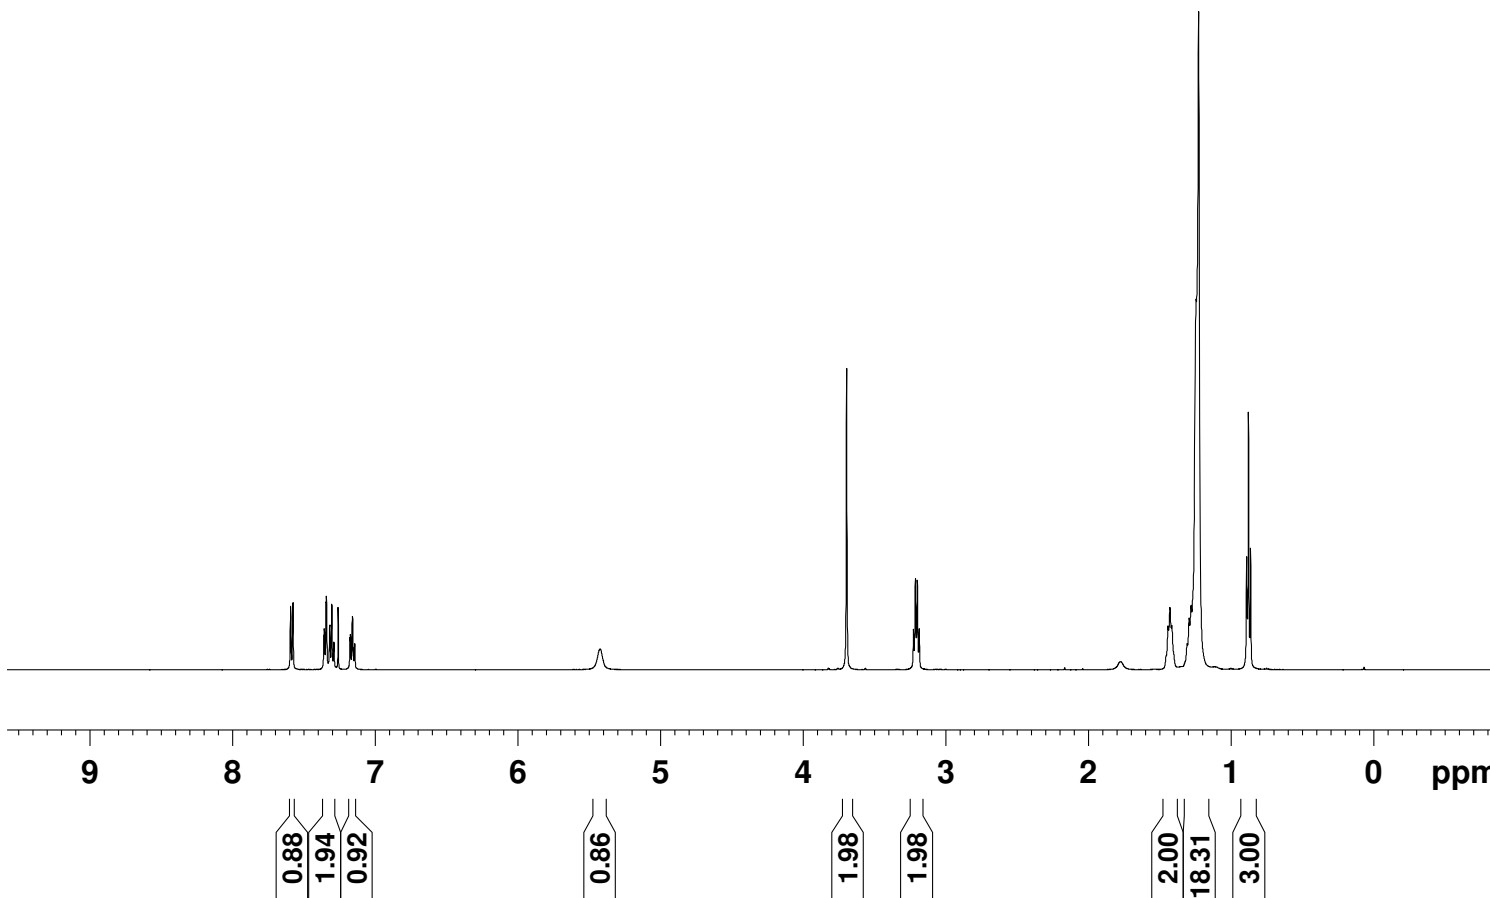

SUNJ-1-262  
C13CPD CDC13

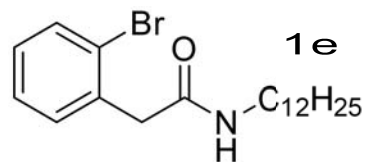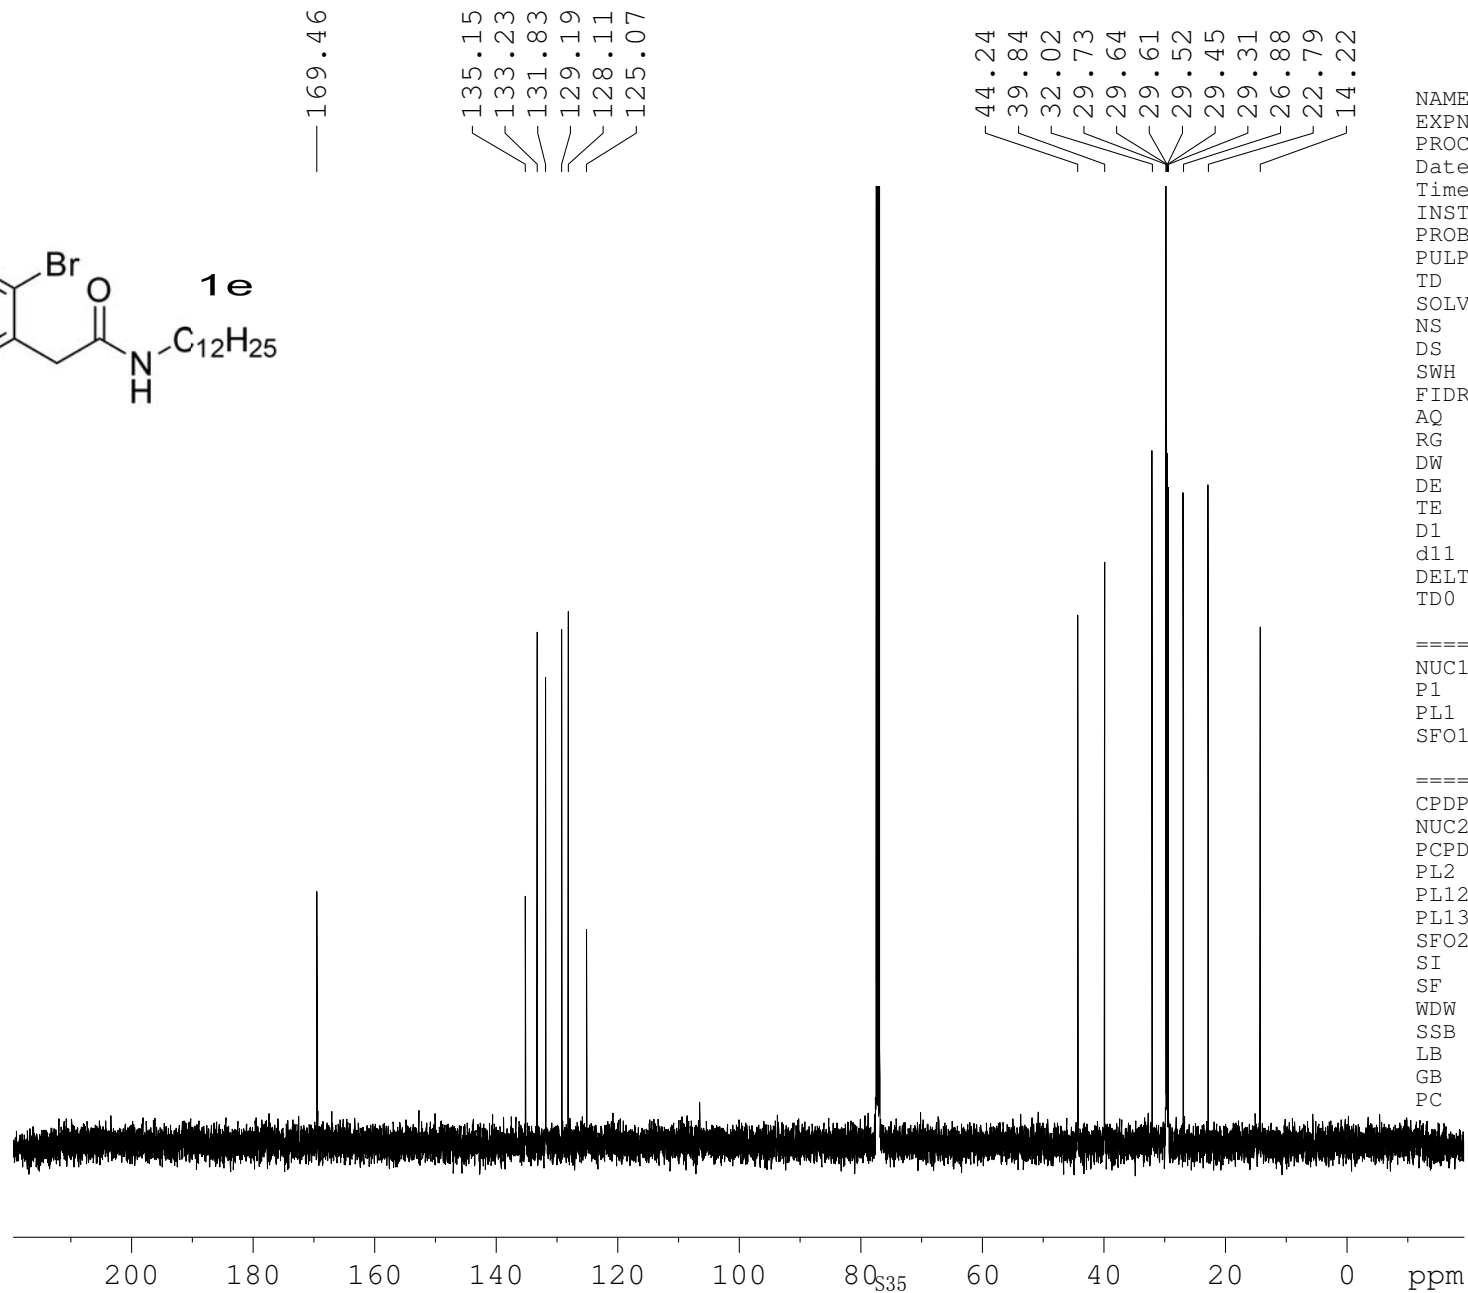

```
NAME          C
EXPNO         21
PROCNO        1
Date_         20110919
Time          10.30
INSTRUM       spect
PROBHD        5 mm PATXO 19F
PULPROG       zgpg30
TD            65536
SOLVENT       CDC13
NS            256
DS            4
SWH           30030.029 Hz
FIDRES        0.458222 Hz
AQ            1.0912410 sec
RG            256
DW            16.650 usec
DE            6.00 usec
TE            297.6 K
D1            2.00000000 sec
d11           0.03000000 sec
DELTA         1.89999998 sec
TD0           1
```

```
===== CHANNEL f1 =====
NUC1          13C
P1            9.50 usec
PL1           -0.50 dB
SFO1         125.7703643 MHz
```

```
===== CHANNEL f2 =====
CPDPRG2       waltz16
NUC2          1H
PCPD2         80.00 usec
PL2           2.00 dB
PL12          16.50 dB
PL13          16.50 dB
SFO2         500.1320005 MHz
SI            32768
SF           125.7577772 MHz
WDW           EM
SSB           0
LB            1.00 Hz
GB            0
PC            1.40
```

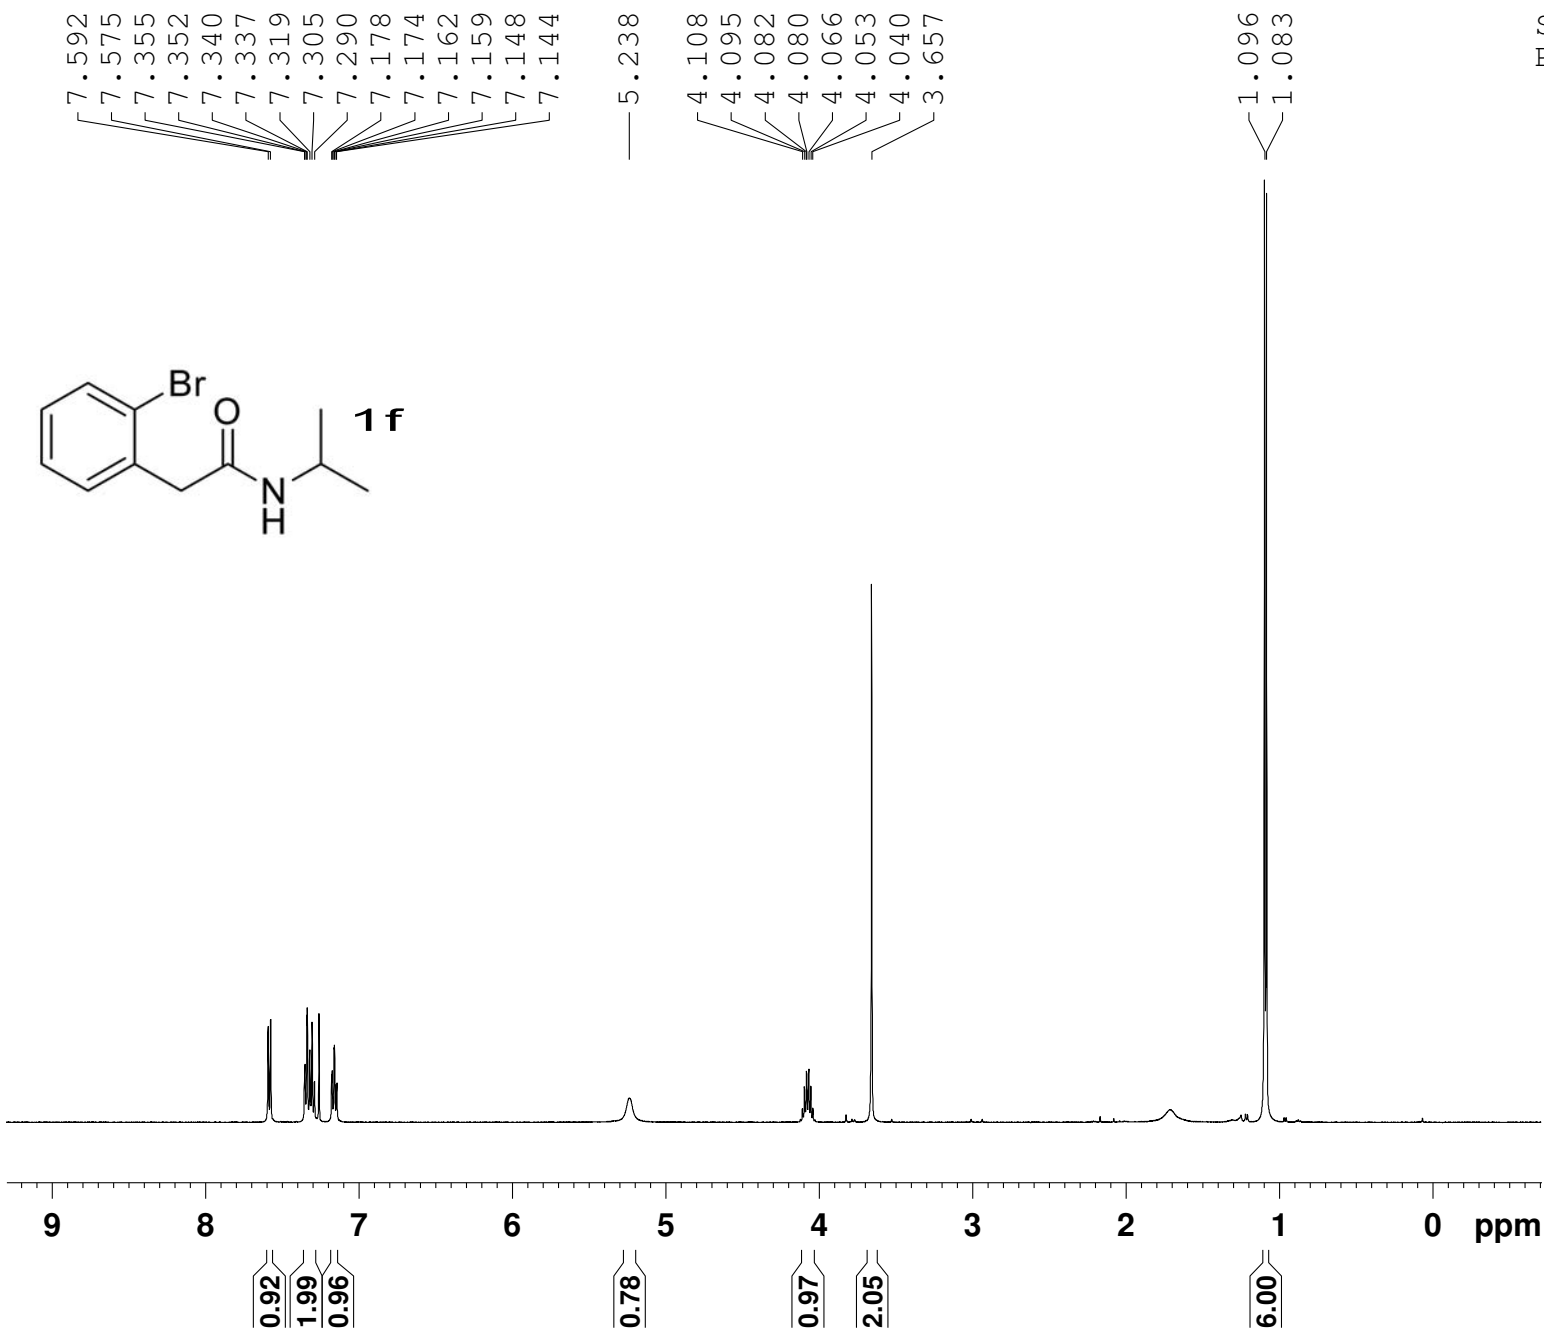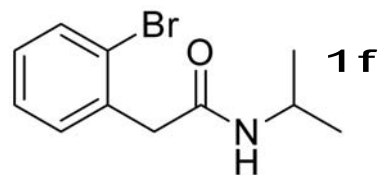

SunJ-1-254-3  
PROTON CDC13 D:\\ deng 5

NAME XUBIN20110909  
EXPNO 2  
PROCNO 1  
Date\_ 20110909  
Time 9.19  
INSTRUM spect  
PROBHD 5 mm PATXO 19F  
PULPROG zg30  
TD 65536  
SOLVENT CDC13  
NS 16  
DS 2  
SWH 10330.578 Hz  
FIDRES 0.157632 Hz  
AQ 3.1720407 sec  
RG 256  
DW 48.400 usec  
DE 6.00 usec  
TE 296.2 K  
D1 1.0000000 sec  
TD0 1

===== CHANNEL f1 =====  
NUC1 1H  
P1 13.76 usec  
PL1 1.00 dB  
SFO1 500.1330885 MHz  
SI 32768  
SF 500.1300129 MHz  
WDW no  
SSB 0  
LB 0.00 Hz  
GB 0  
PC 1.00

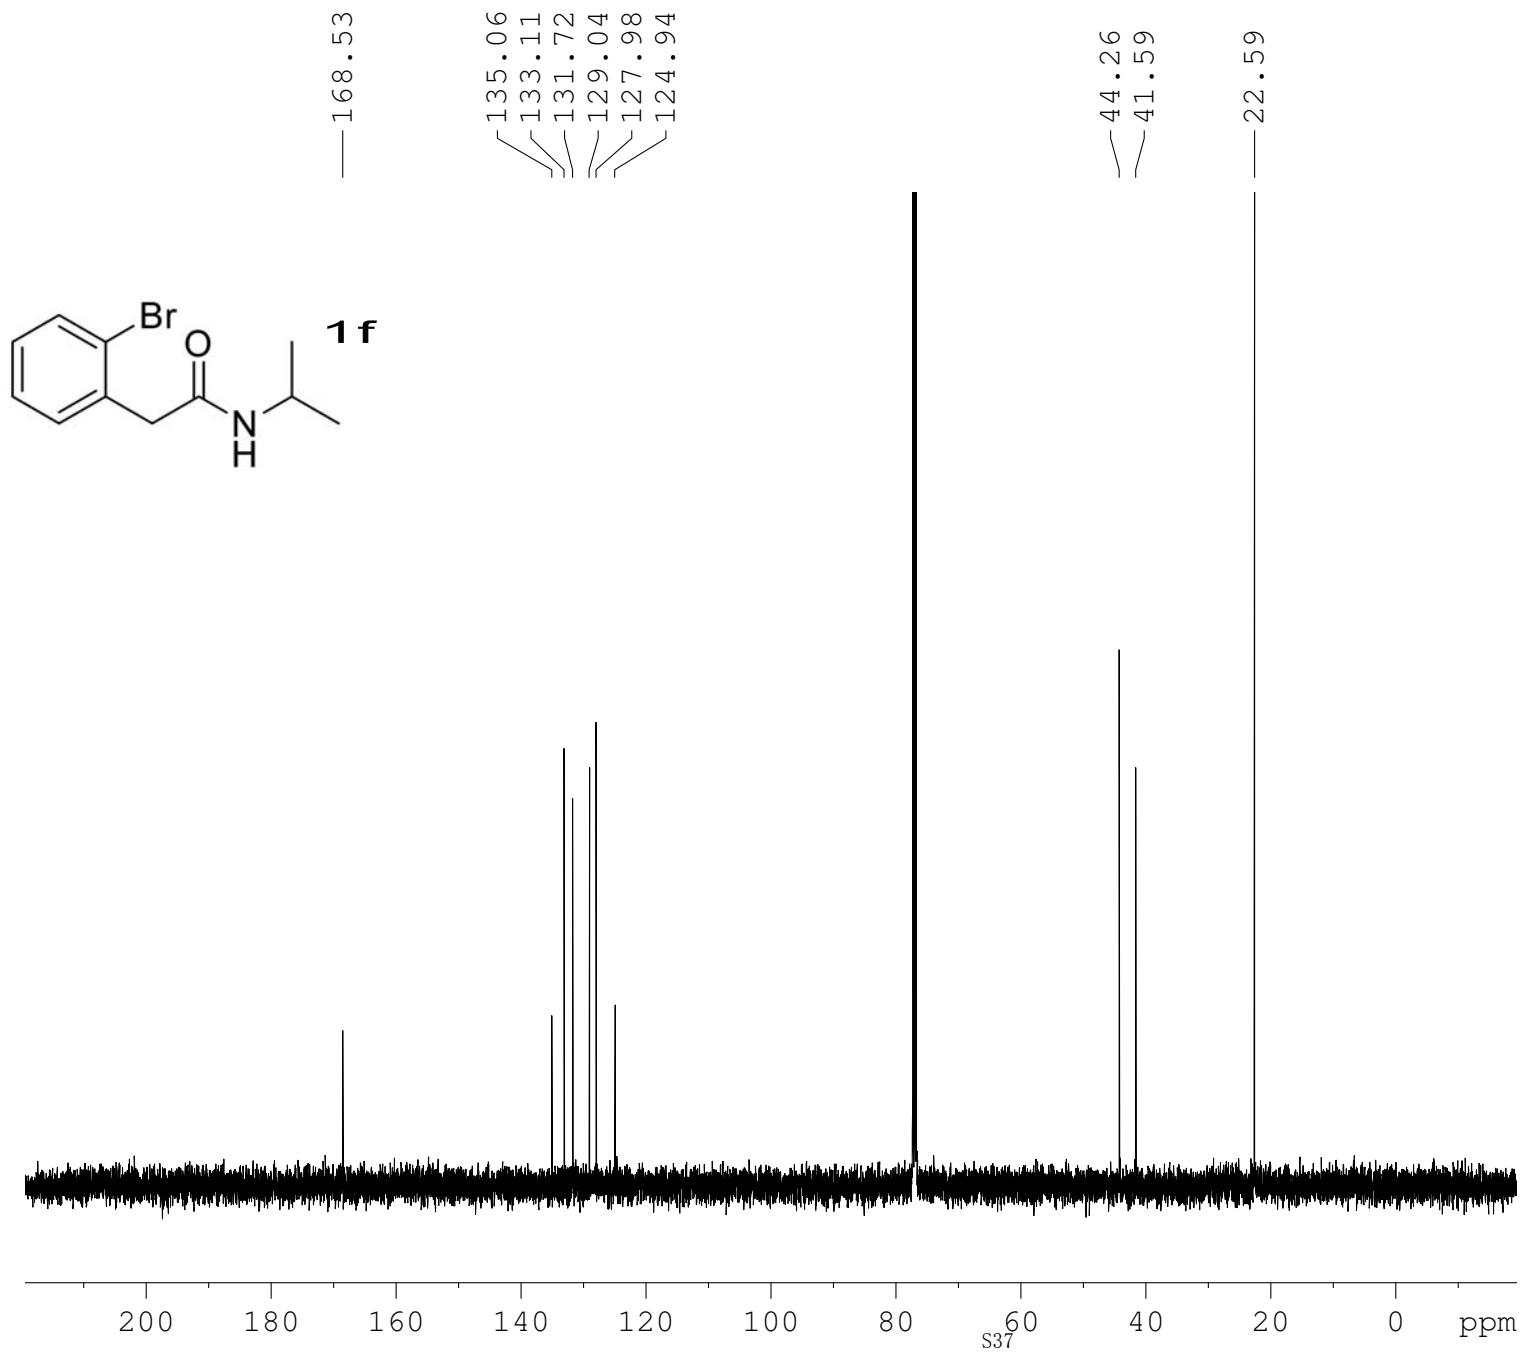

SUNJ-1-254-3  
C13CPD CDC13 D:\\ deng 4!

```
NAME          EEEE
EXPNO          7
PROCNO         1
Date_          20110915
Time           17.52
INSTRUM        spect
PROBHD         5 mm PATXO 19F
PULPROG        zgpg30
TD             65536
SOLVENT        CDC13
NS             256
DS             4
SWH            30030.029 Hz
FIDRES         0.458222 Hz
AQ             1.0912410 sec
RG             322.5
DW             16.650 usec
DE             6.00 usec
TE             298.7 K
D1             2.00000000 sec
TD0            1
```

```
===== CHANNEL f1 =====
NUC1           13C
P1             9.50 usec
PL1            -0.50 dB
SFO1           125.7703643 MHz
SI             32768
SF             125.7577890 MHz
WDW            EM
SSB            0
LB             1.00 Hz
GB             0
PC             1.40
```

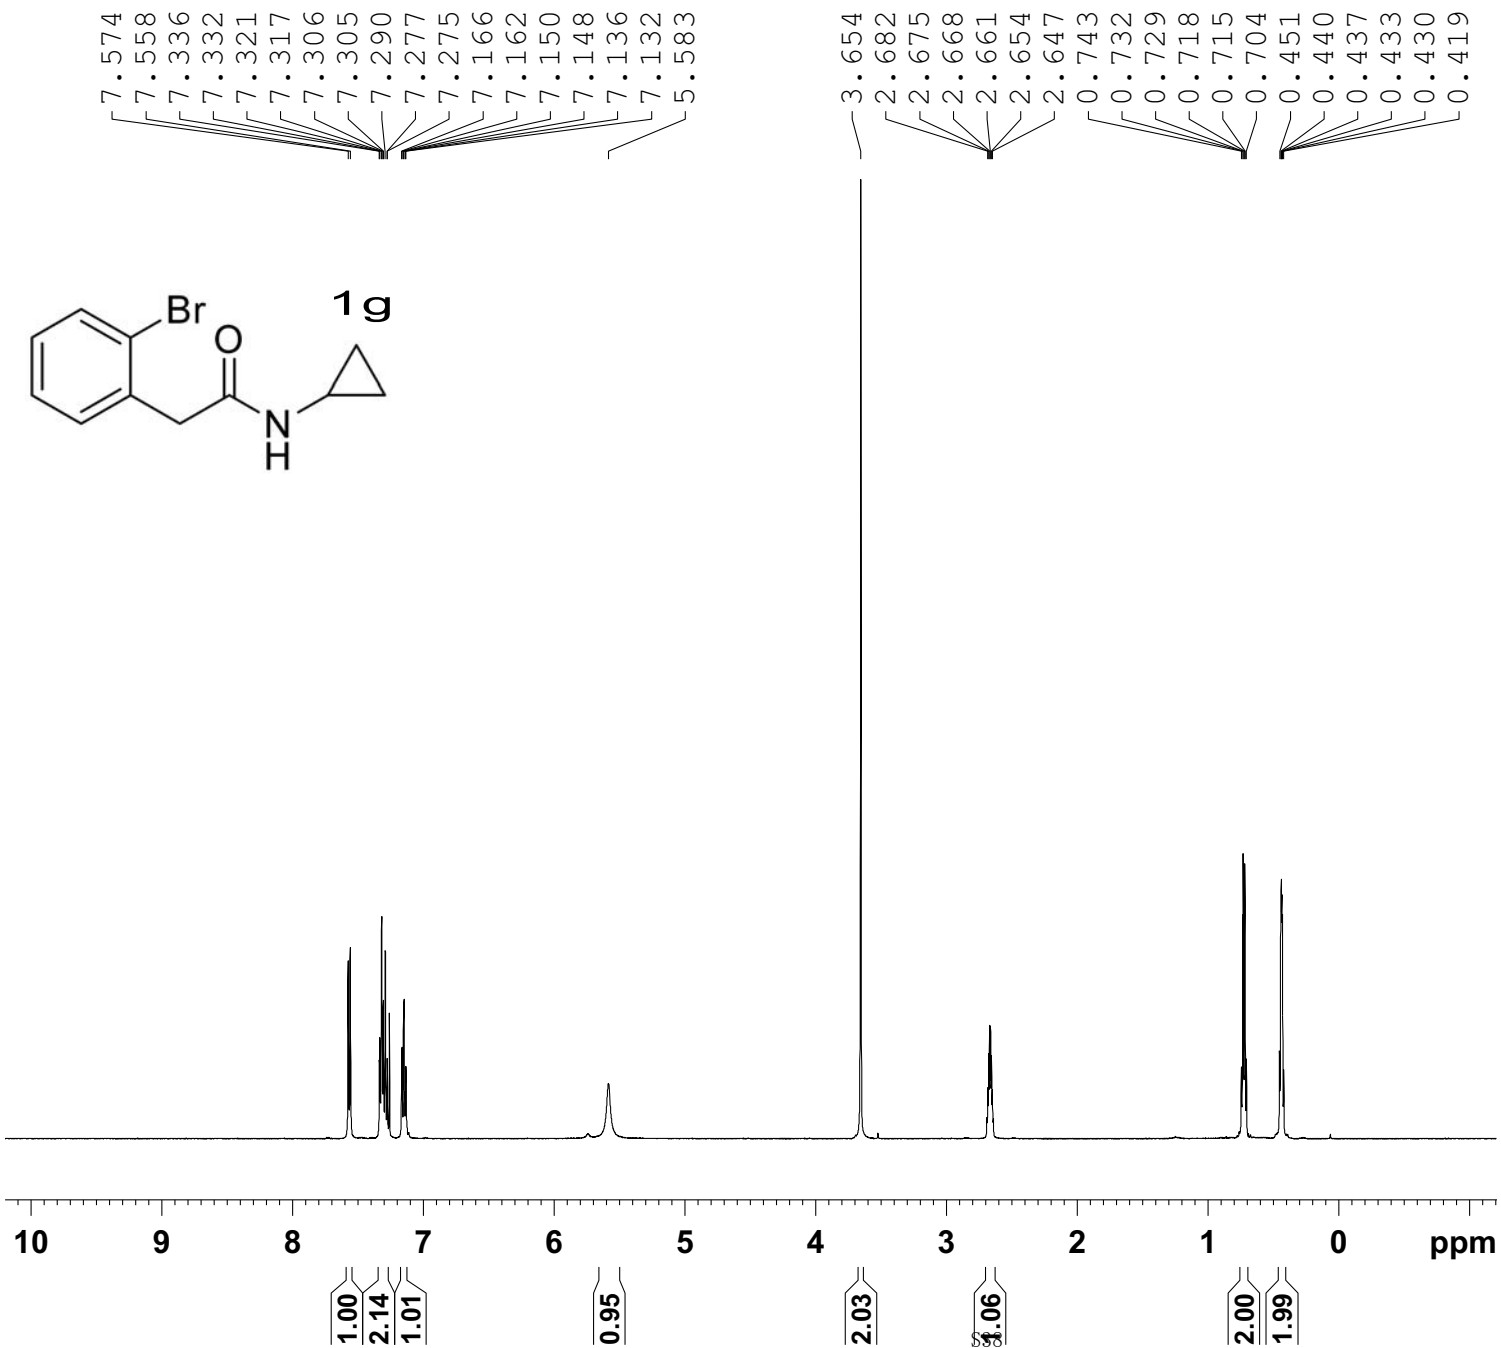

SUNJ-1-263  
PROTON CDC13 D:\\ deng 5

NAME xb20110916  
EXPNO 12  
PROCNO 1  
Date\_ 20110916  
Time\_ 18.09  
INSTRUM spect  
PROBHD 5 mm PATXO 19F  
PULPROG zg30  
TD 65536  
SOLVENT CDC13  
NS 16  
DS 2  
SWH 10330.578 Hz  
FIDRES 0.157632 Hz  
AQ 3.1720407 sec  
RG 203.2  
DW 48.400 usec  
DE 6.00 usec  
TE 297.4 K  
D1 1.00000000 sec  
TD0 1

===== CHANNEL f1 =====  
NUC1 1H  
P1 13.76 usec  
PL1 1.00 dB  
SFO1 500.1330885 MHz  
SI 32768  
SF 500.1300133 MHz  
WDW no  
SSB 0  
LB 0.00 Hz  
GB 0  
PC 1.00

SUNJ-1-263  
C13CPD CDC13 D:\\ deng 24

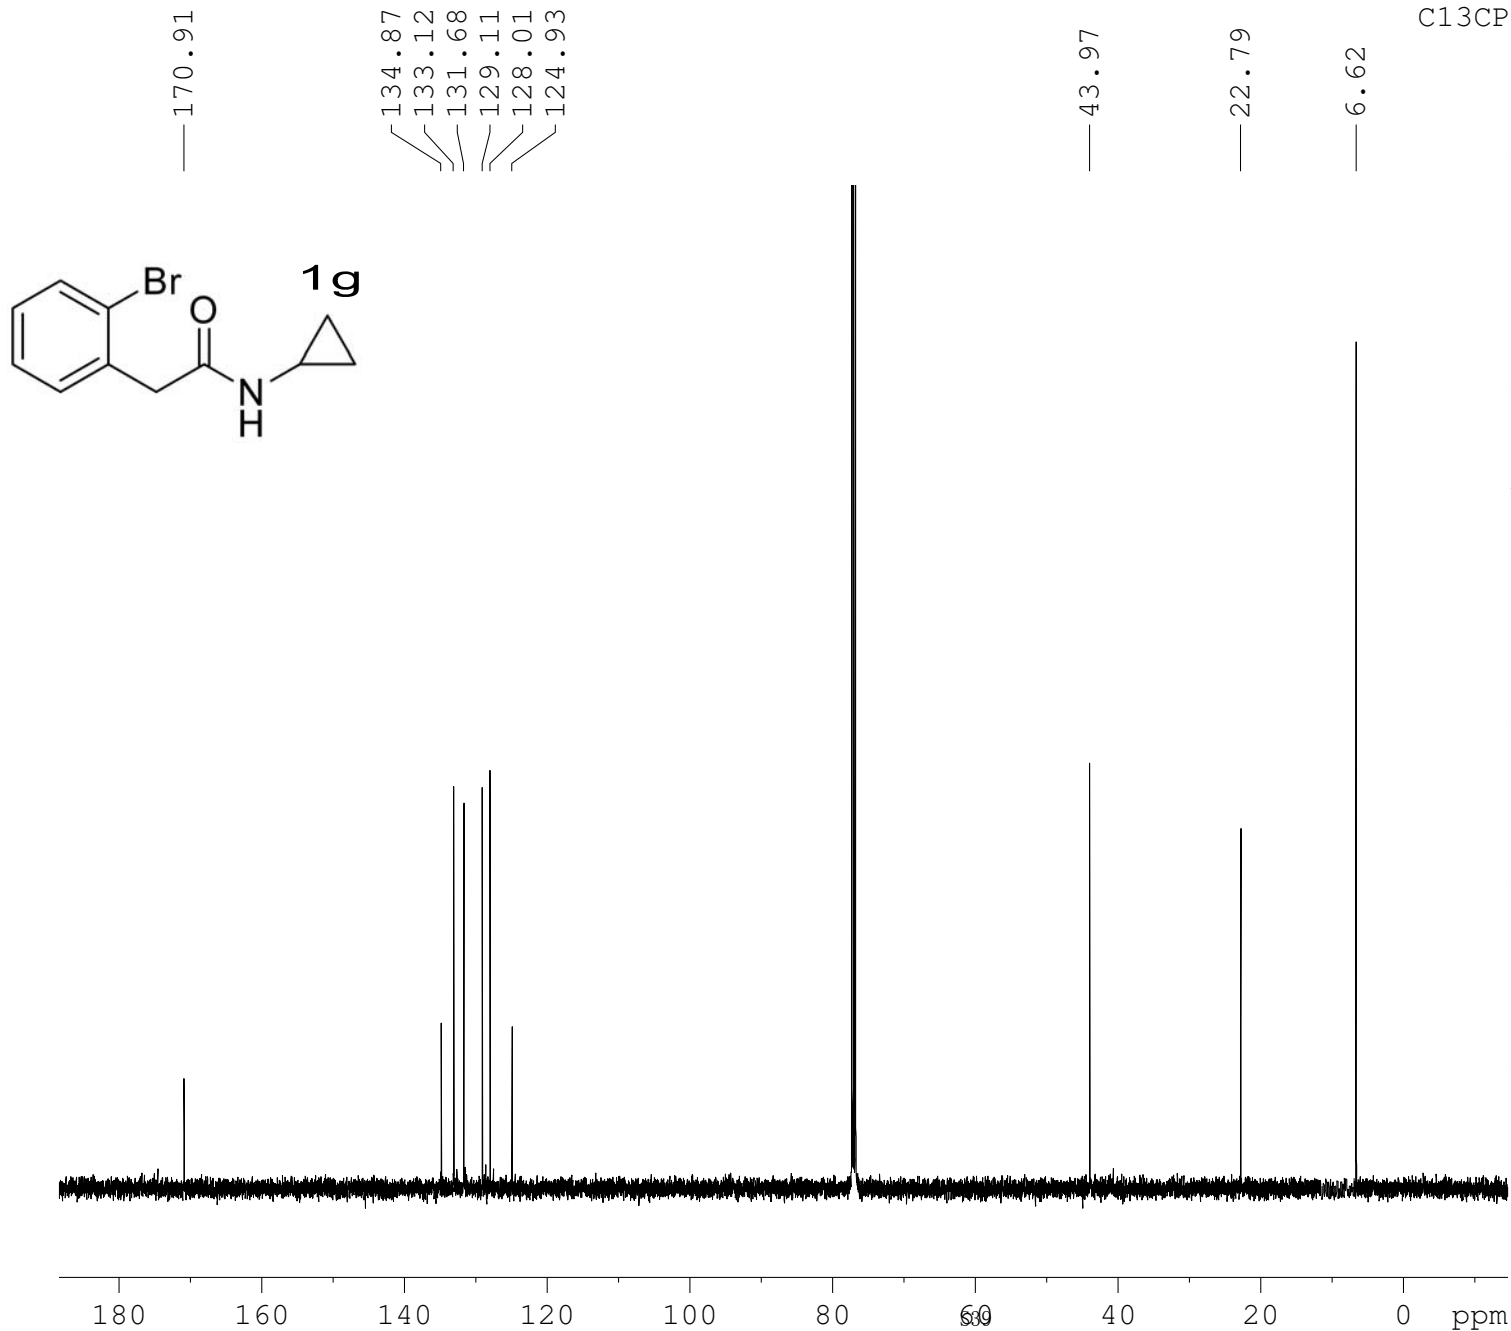

```
NAME          C
EXPNO         23
PROCNO        1
Date_         20110919
Time          17.34
INSTRUM       spect
PROBHD        5 mm PATXO 19F
PULPROG       zgpg30
TD            65536
SOLVENT       CDC13
NS            256
DS            4
SWH           30030.029 Hz
FIDRES        0.458222 Hz
AQ            1.0912410 sec
RG            228.1
DW            16.650 usec
DE            6.00 usec
TE            298.3 K
D1            2.00000000 sec
d11           0.03000000 sec
DELTA         1.89999998 sec
TD0           1
```

```
===== CHANNEL f1 =====
NUC1          13C
P1            9.50 usec
PL1           -0.50 dB
SFO1          125.7703643 MHz
```

```
===== CHANNEL f2 =====
CPDPRG2       waltz16
NUC2          1H
PCPD2         80.00 usec
PL2           2.00 dB
PL12          16.50 dB
PL13          16.50 dB
SFO2          500.1320005 MHz
SI            32768
SF            125.7577890 MHz
WDW           EM
SSB           0
LB            1.00 Hz
GB            0
PC            1.40
```

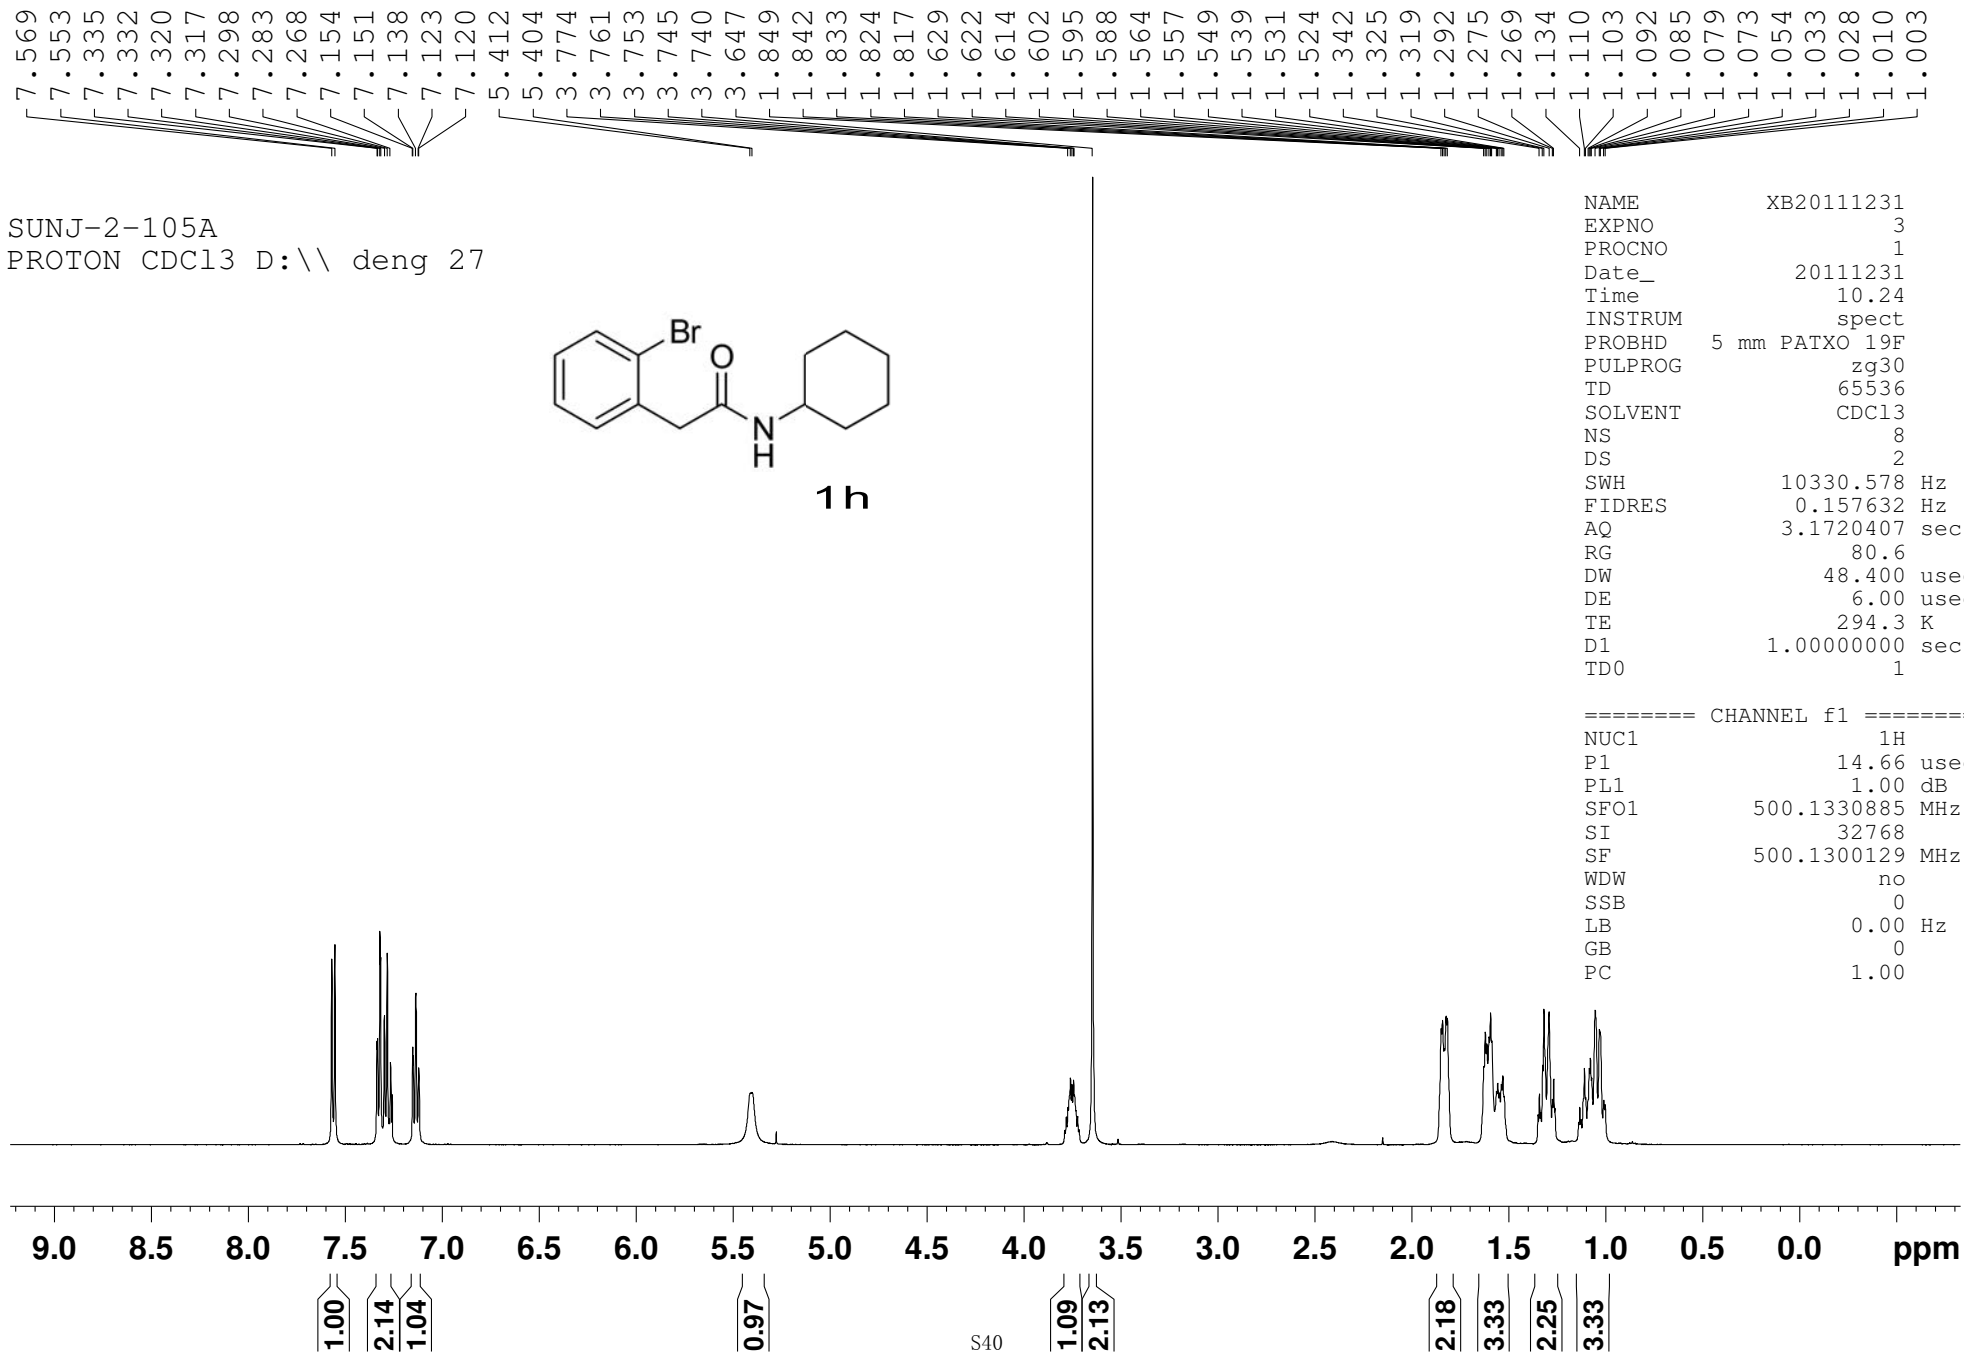



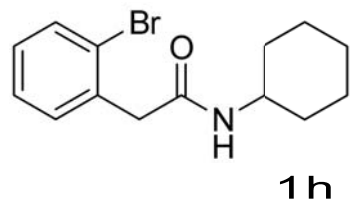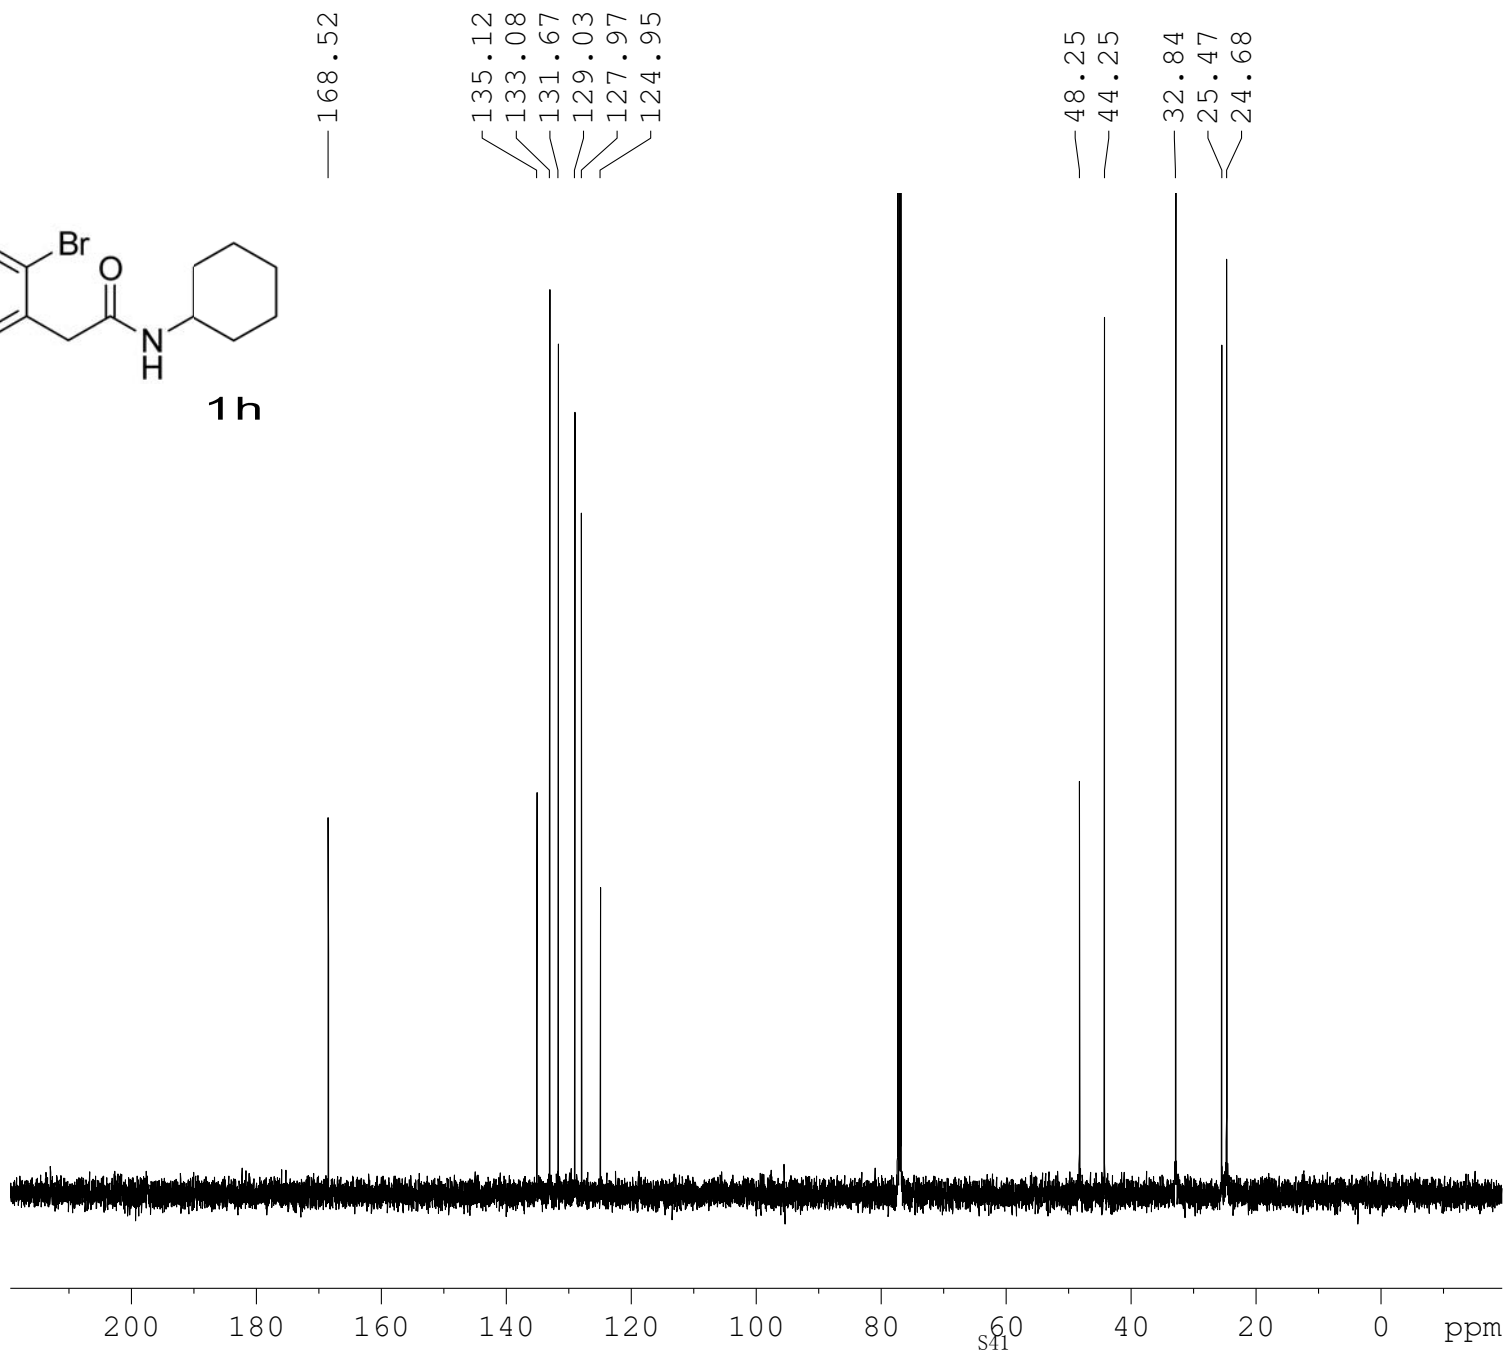

SUNJ-2-105A  
C13CPD CDC13 D:\ deng 2

```
NAME          XB20111231
EXPNO         4
PROCNO        1
Date_         20111231
Time          10.32
INSTRUM       spect
PROBHD        5 mm PATXO 19F
PULPROG       zgpg30
TD            65536
SOLVENT       CDC13
NS            128
DS            4
SWH           30030.029 Hz
FIDRES        0.458222 Hz
AQ            1.0912410 sec
RG            114
DW            16.650 usec
DE            6.00 usec
TE            295.3 K
D1            2.0000000 sec
TD0           1
```

```
===== CHANNEL f1 =====
NUC1          13C
P1            9.50 usec
PL1           -0.50 dB
SFO1          125.7703643 MHz
SI            32768
SF            125.7577890 MHz
WDW           EM
SSB           0
LB            1.00 Hz
GB            0
PC            1.40
```

SUNJ1-272-3  
PROTON CDC13 D:\\ deng 42

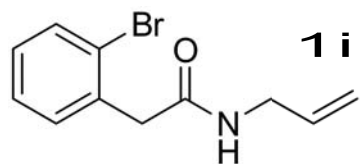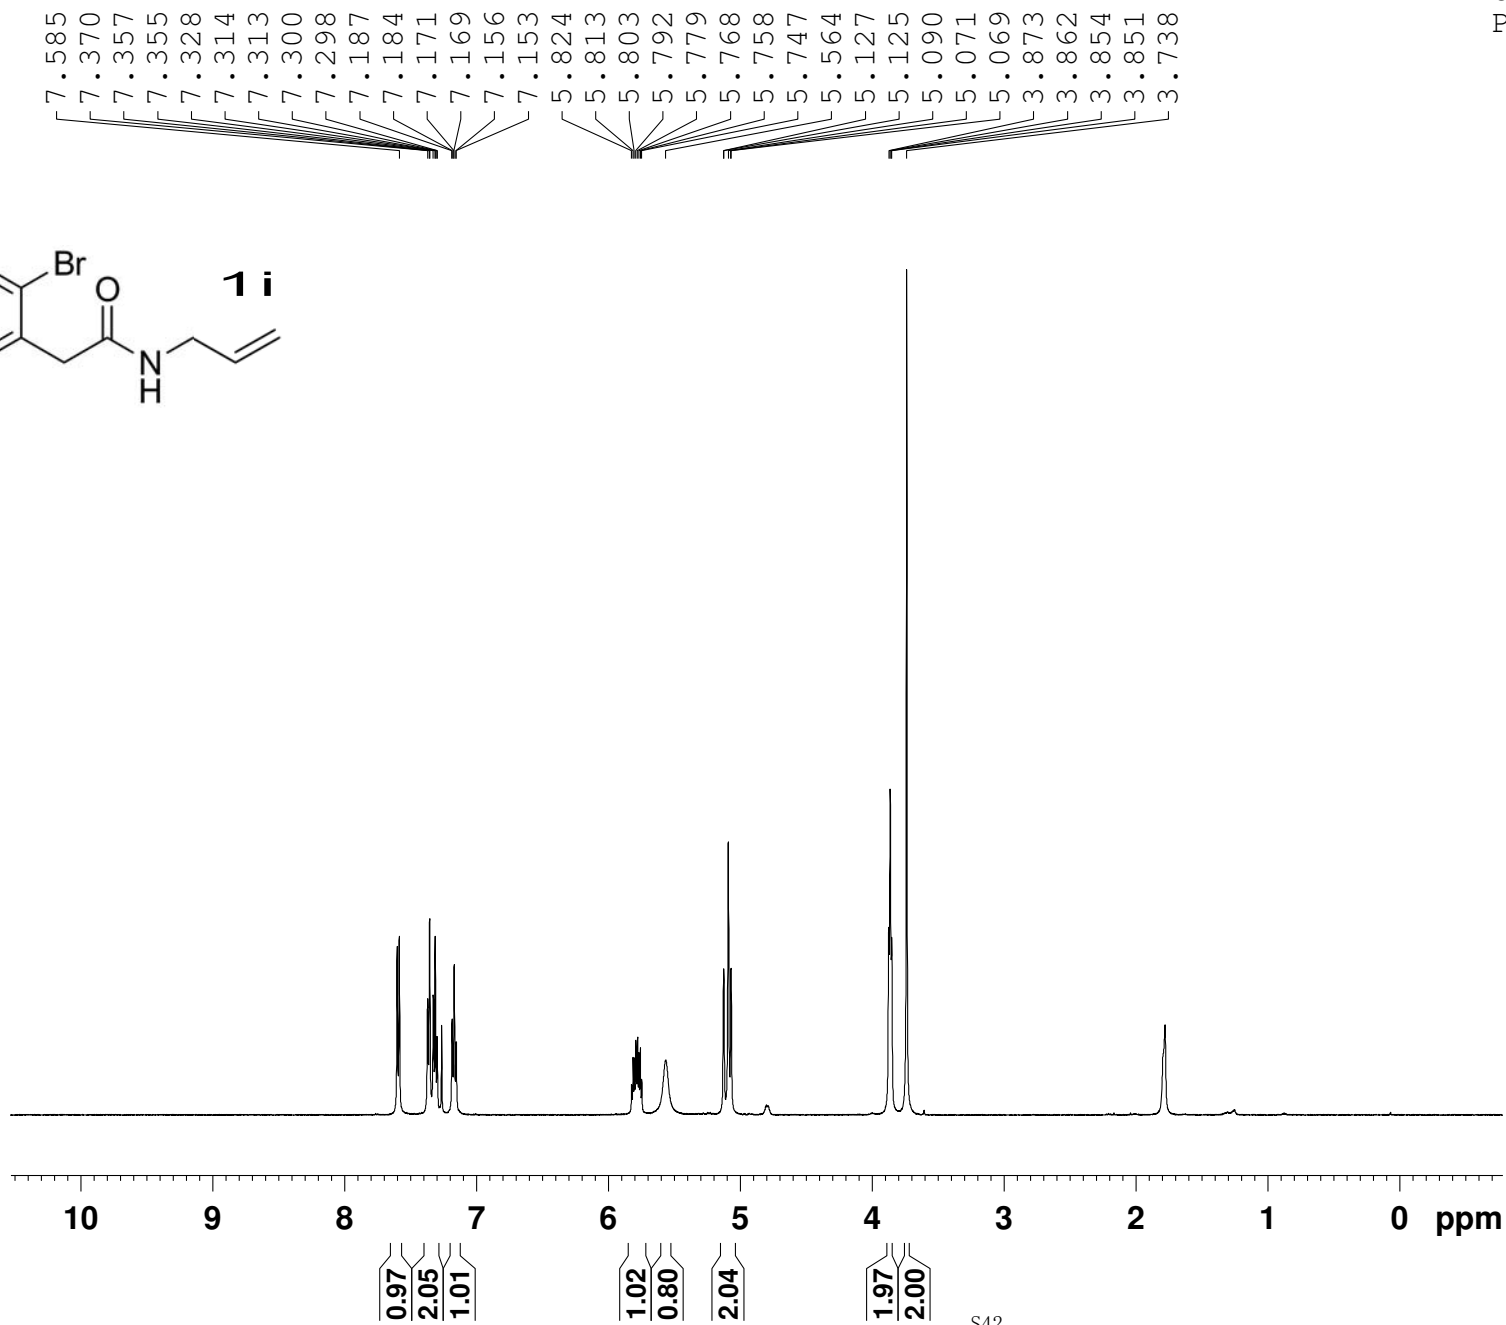

NAME xb20110920  
EXPNO 3  
PROCNO 1  
Date\_ 20110920  
Time 9.36  
INSTRUM spect  
PROBHD 5 mm PATXO 19F  
PULPROG zg30  
TD 65536  
SOLVENT CDCl3  
NS 8  
DS 2  
SWH 10330.578 Hz  
FIDRES 0.157632 Hz  
AQ 3.1720407 sec  
RG 203.2  
DW 48.400 usec  
DE 6.00 usec  
TE 295.6 K  
D1 1.00000000 sec  
TD0 1

===== CHANNEL f1 =====  
NUC1 1H  
P1 13.76 usec  
PL1 1.00 dB  
SF01 500.1330885 MHz  
SI 32768  
SF 500.1300105 MHz  
WDW no  
SSB 0  
LB 0.00 Hz  
GB 0  
PC 1.00

SUNJ-1-308-4  
C13CPD CDC13 D:\\ deng 20

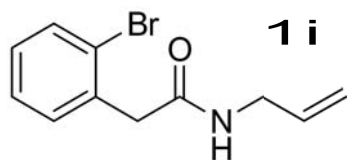

— 169.58

134.75  
133.90  
133.17  
131.78  
129.21  
128.07  
124.99  
116.21

< 43.93  
< 42.00

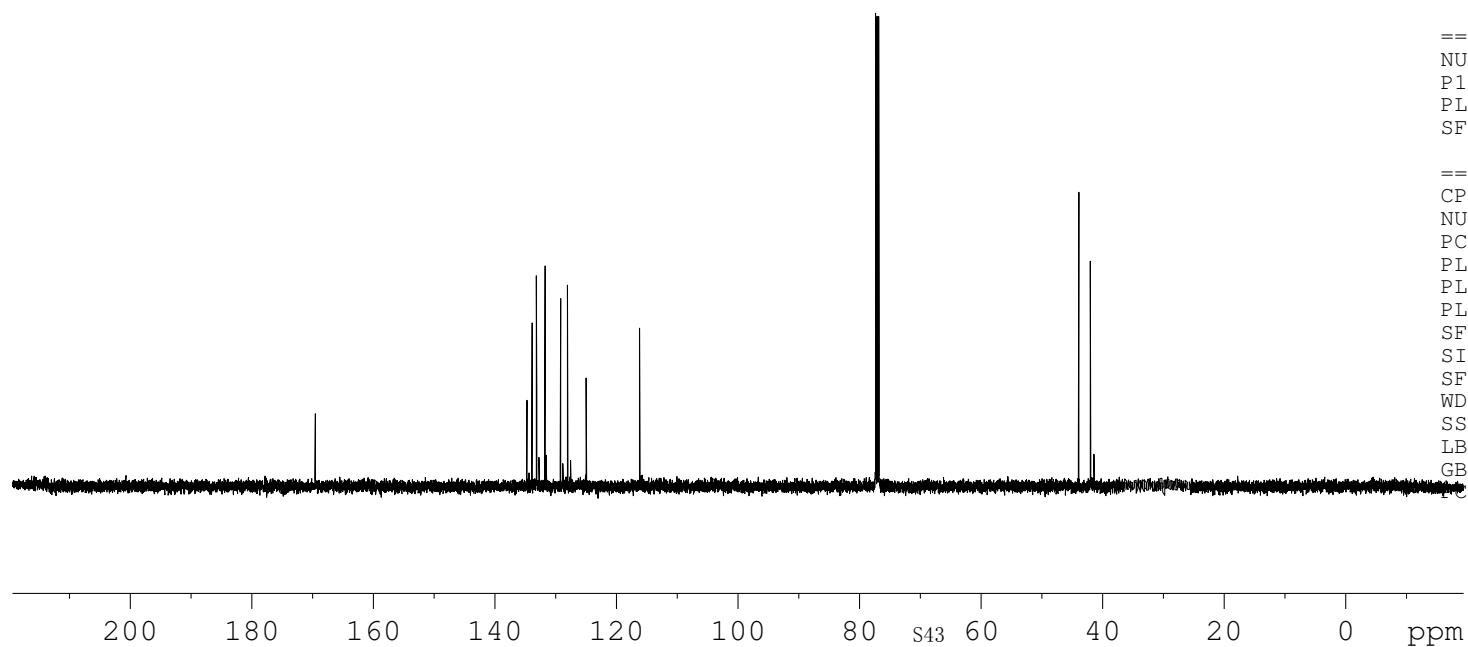

| NAME    | c-nmr          |
|---------|----------------|
| EXPNO   | 12             |
| PROCNO  | 1              |
| Date_   | 20111012       |
| Time    | 9.55           |
| INSTRUM | spect          |
| PROBHD  | 5 mm PATXO 19F |
| PULPROG | zgpg30         |
| TD      | 65536          |
| SOLVENT | CDC13          |
| NS      | 128            |
| DS      | 4              |
| SWH     | 30030.029 Hz   |
| FIDRES  | 0.458222 Hz    |
| AQ      | 1.0912410 sec  |
| RG      | 181            |
| DW      | 16.650 usec    |
| DE      | 6.00 usec      |
| TE      | 297.5 K        |
| D1      | 2.00000000 sec |
| d11     | 0.03000000 sec |
| DELTA   | 1.89999998 sec |
| TD0     | 1              |

==== CHANNEL f1 =====

|      |                 |
|------|-----------------|
| NUC1 | 13C             |
| P1   | 9.50 usec       |
| PL1  | -0.50 dB        |
| SFO1 | 125.7703643 MHz |

==== CHANNEL f2 =====

|         |                 |
|---------|-----------------|
| CPDPRG2 | waltz16         |
| NUC2    | 1H              |
| PCPD2   | 80.00 usec      |
| PL2     | 2.00 dB         |
| PL12    | 16.50 dB        |
| PL13    | 16.50 dB        |
| SFO2    | 500.1320005 MHz |
| SI      | 32768           |
| SF      | 125.7577890 MHz |
| WDW     | EM              |
| SSB     | 0               |
| LB      | 1.00 Hz         |
| GB      | 0               |
| PC      | 1.40            |

SUNJ1-272-2  
PROTON CDCl3 D:\ \ deng 4

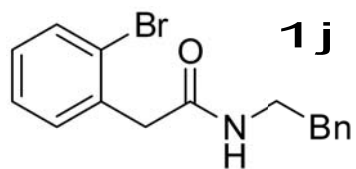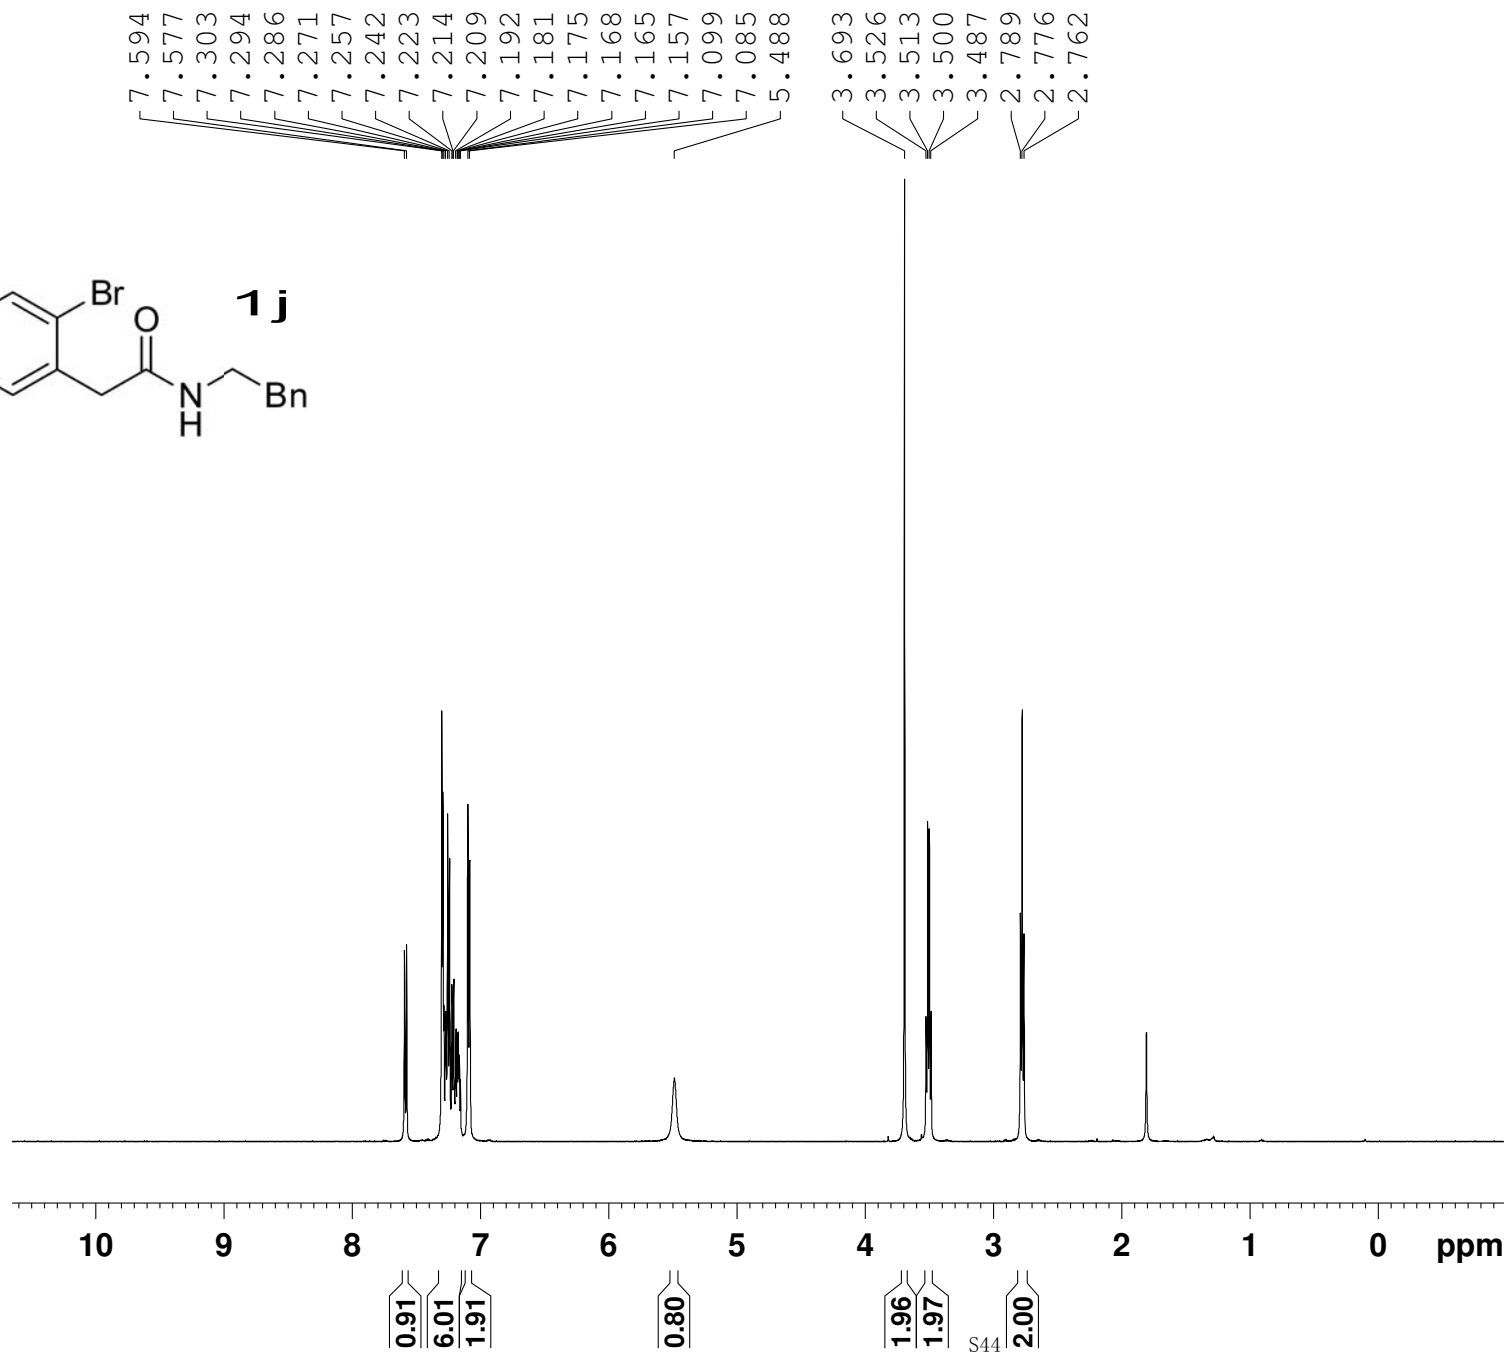

NAME xb20110920  
EXPNO 2  
PROCNO 1  
Date\_ 20110920  
Time 9.31  
INSTRUM spect  
PROBHD 5 mm PATXO 19F  
PULPROG zg30  
TD 65536  
SOLVENT CDCl3  
NS 8  
DS 2  
SWH 10330.578 Hz  
FIDRES 0.157632 Hz  
AQ 3.1720407 sec  
RG 161.3  
DW 48.400 usec  
DE 6.00 usec  
TE 295.7 K  
D1 1.00000000 sec  
TD0 1

==== CHANNEL f1 =====  
NUC1 1H  
P1 13.76 usec  
PL1 1.00 dB  
SFO1 500.1330885 MHz  
SI 32768  
SF 500.1300000 MHz  
WDW no  
SSB 0  
LB 0.00 Hz  
GB 0  
PC 1.00

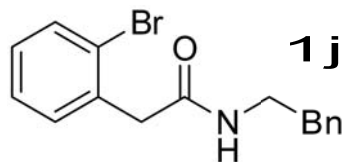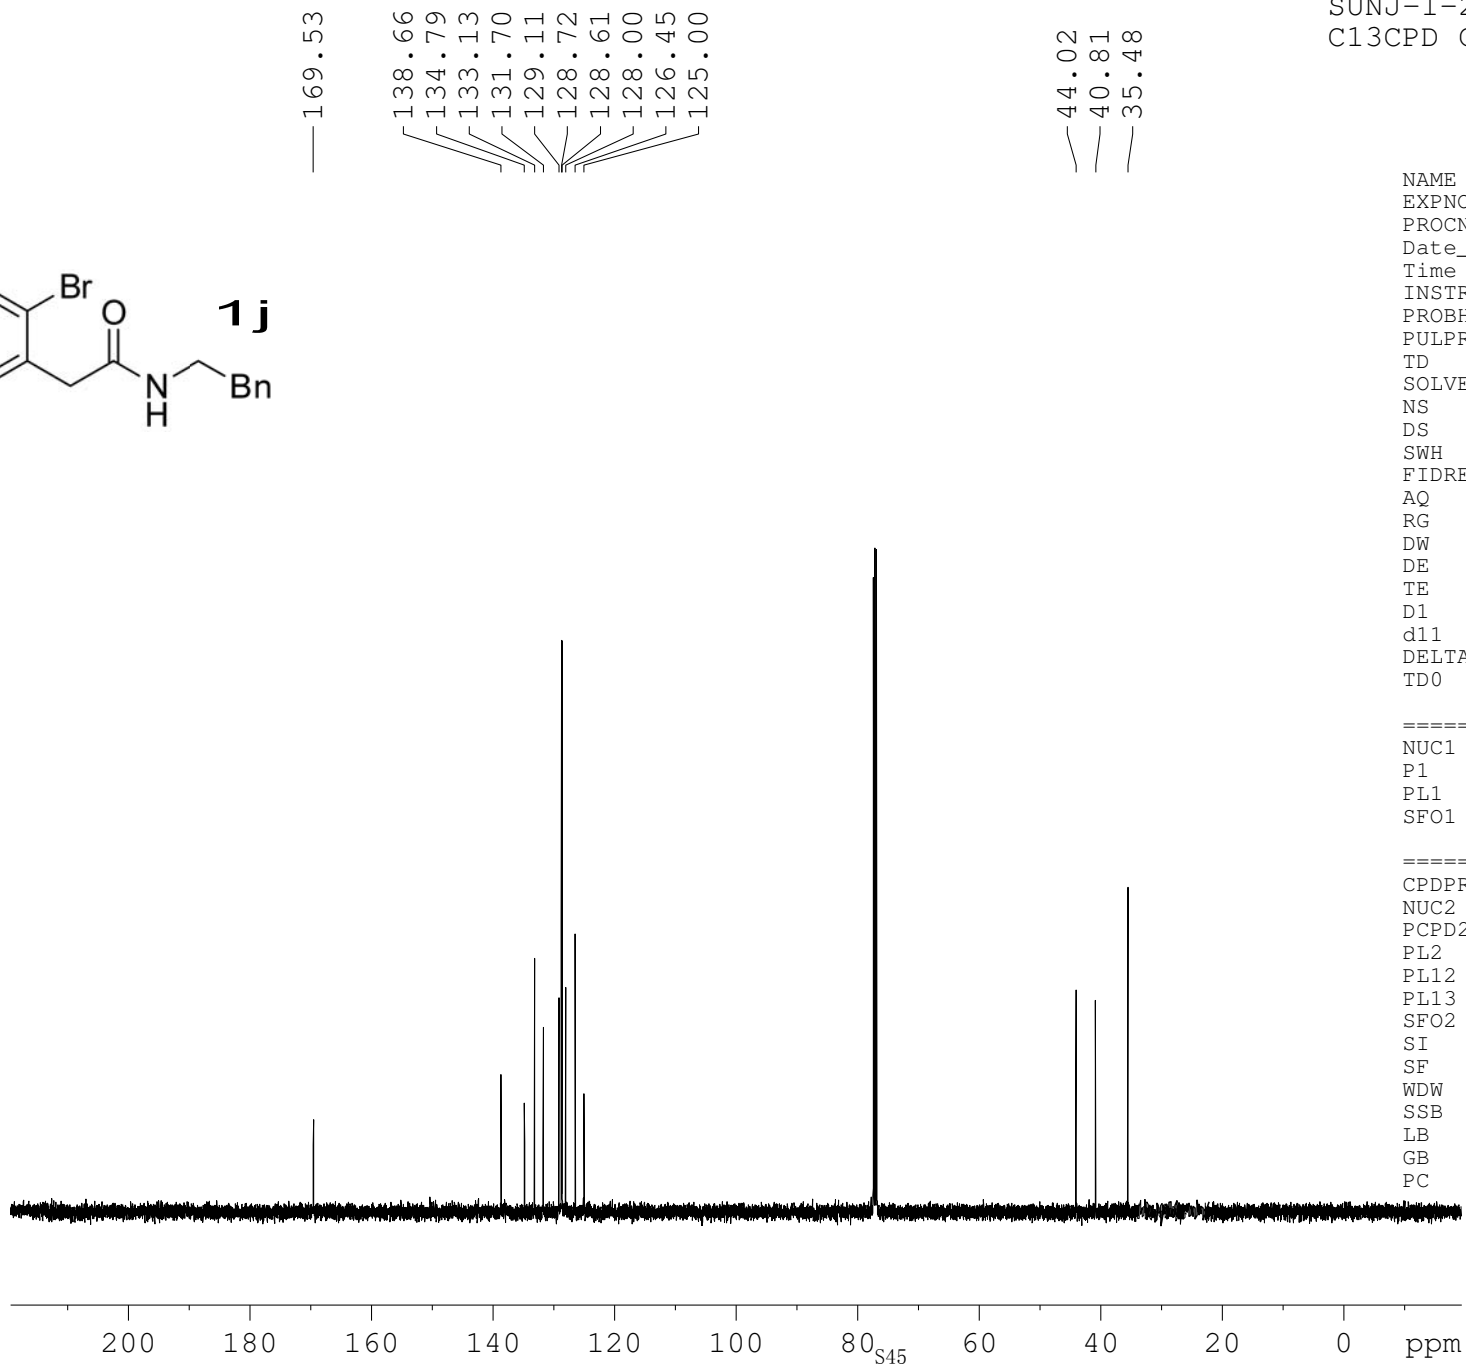

SUNJ-1-272-2  
C13CPD CDC13 D:\\ deng 21

```
NAME          c-nmr
EXPNO          13
PROCNO         1
Date_          20111012
Time           10.07
INSTRUM        spect
PROBHD         5 mm PATXO 19F
PULPROG        zgpg30
TD             65536
SOLVENT        CDC13
NS             128
DS             4
SWH            30030.029 Hz
FIDRES         0.458222 Hz
AQ            1.0912410 sec
RG            114
DW            16.650 usec
DE            6.00 usec
TE            297.7 K
D1            2.00000000 sec
d11           0.03000000 sec
DELTA         1.89999998 sec
TD0           1
```

```
===== CHANNEL f1 =====
NUC1           13C
P1             9.50 usec
PL1           -0.50 dB
SFO1          125.7703643 MHz
```

```
===== CHANNEL f2 =====
CPDPRG2        waltz16
NUC2           1H
PCPD2          80.00 usec
PL2            2.00 dB
PL12           16.50 dB
PL13           16.50 dB
SFO2          500.1320005 MHz
SI            32768
SF            125.7577890 MHz
WDW            EM
SSB            0
LB            1.00 Hz
GB            0
PC            1.40
```

SUNJ-3-99  
PROTON CDC13 D:\ deng 13

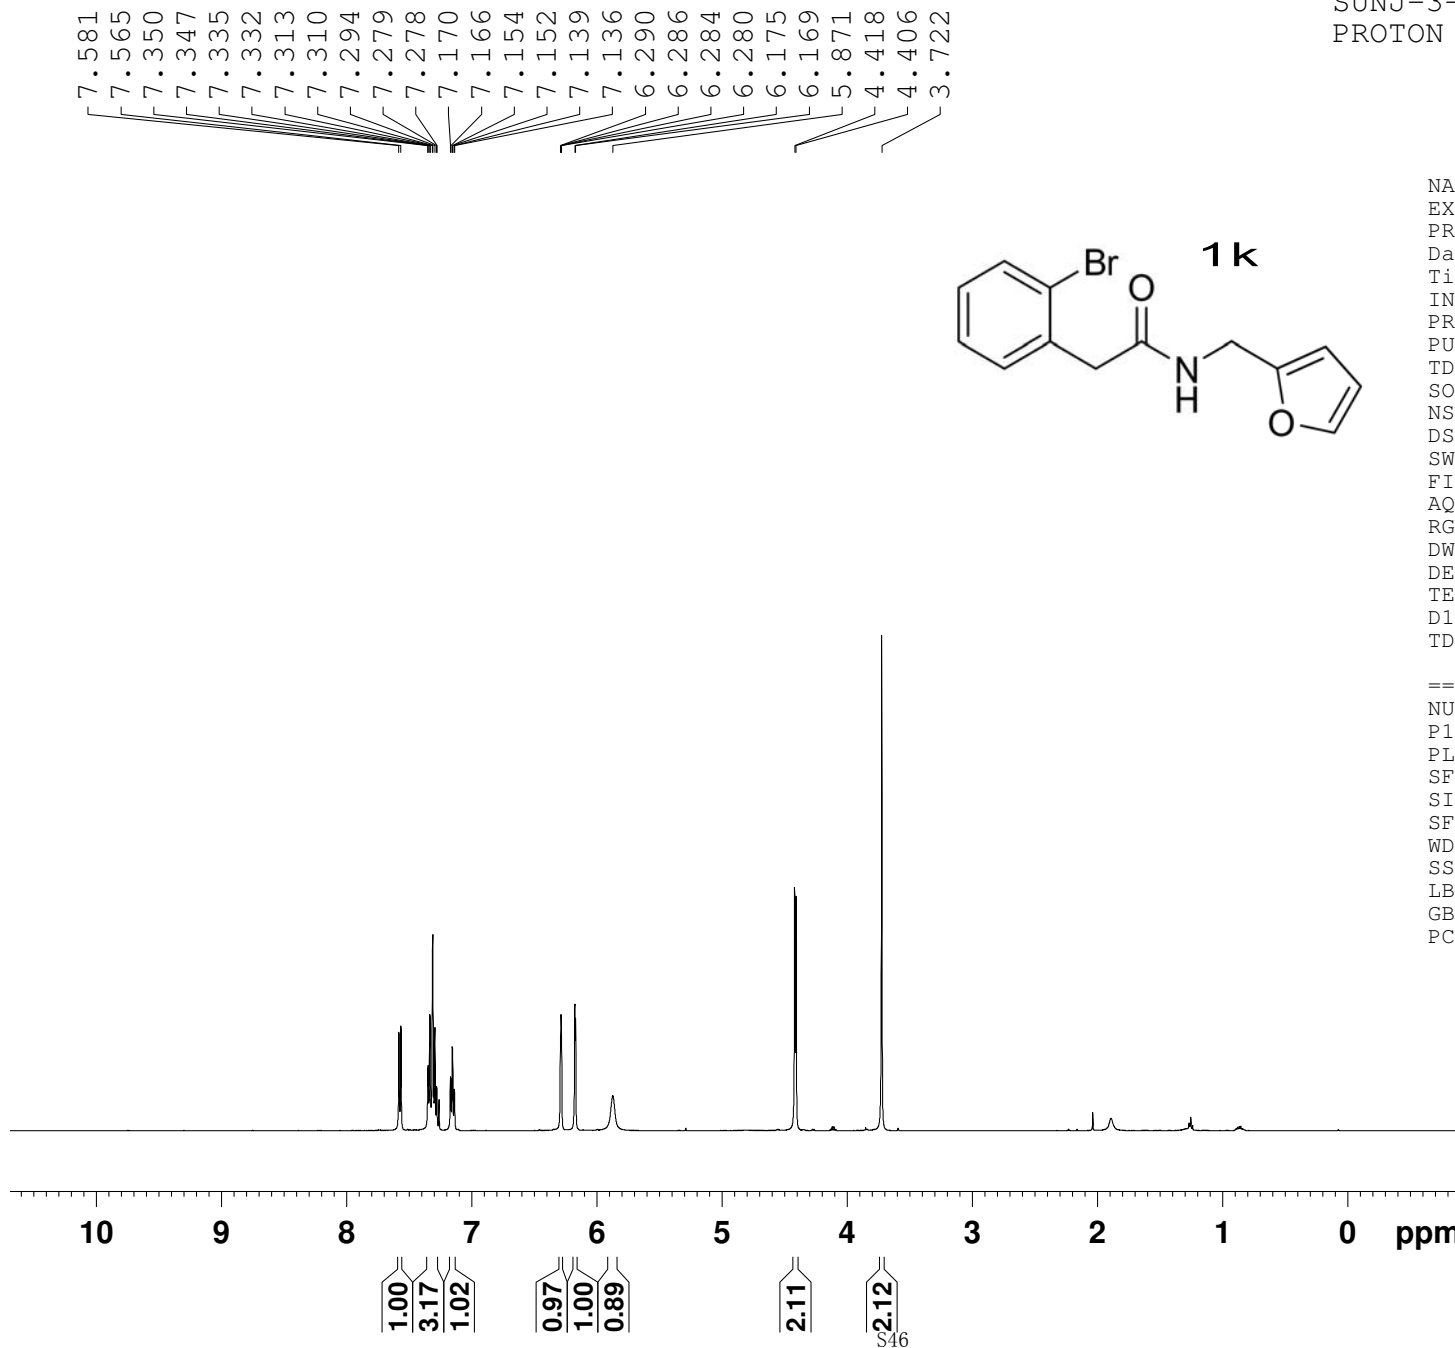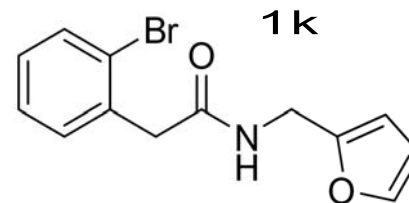

```
NAME          xb20120719
EXPNO          5
PROCNO         1
Date_          20120719
Time           15.54
INSTRUM        spect
PROBHD         5 mm PATXO 19F
PULPROG        zg30
TD             65536
SOLVENT        CDC13
NS             16
DS             2
SWH            10330.578 Hz
FIDRES         0.157632 Hz
AQ             3.1720407 sec
RG             181
DW             48.400 usec
DE             6.00 usec
TE             295.9 K
D1             1.00000000 sec
TD0            1

===== CHANNEL f1 =====
NUC1           1H
P1             13.72 usec
PL1            1.00 dB
SFO1           500.1330885 MHz
SI             32768
SF             500.1300127 MHz
WDW            no
SSB            0
LB             0.00 Hz
GB             0
PC             1.00
```

SUNJ-3-99  
C13CPD CDC13 D:\\ deng 1

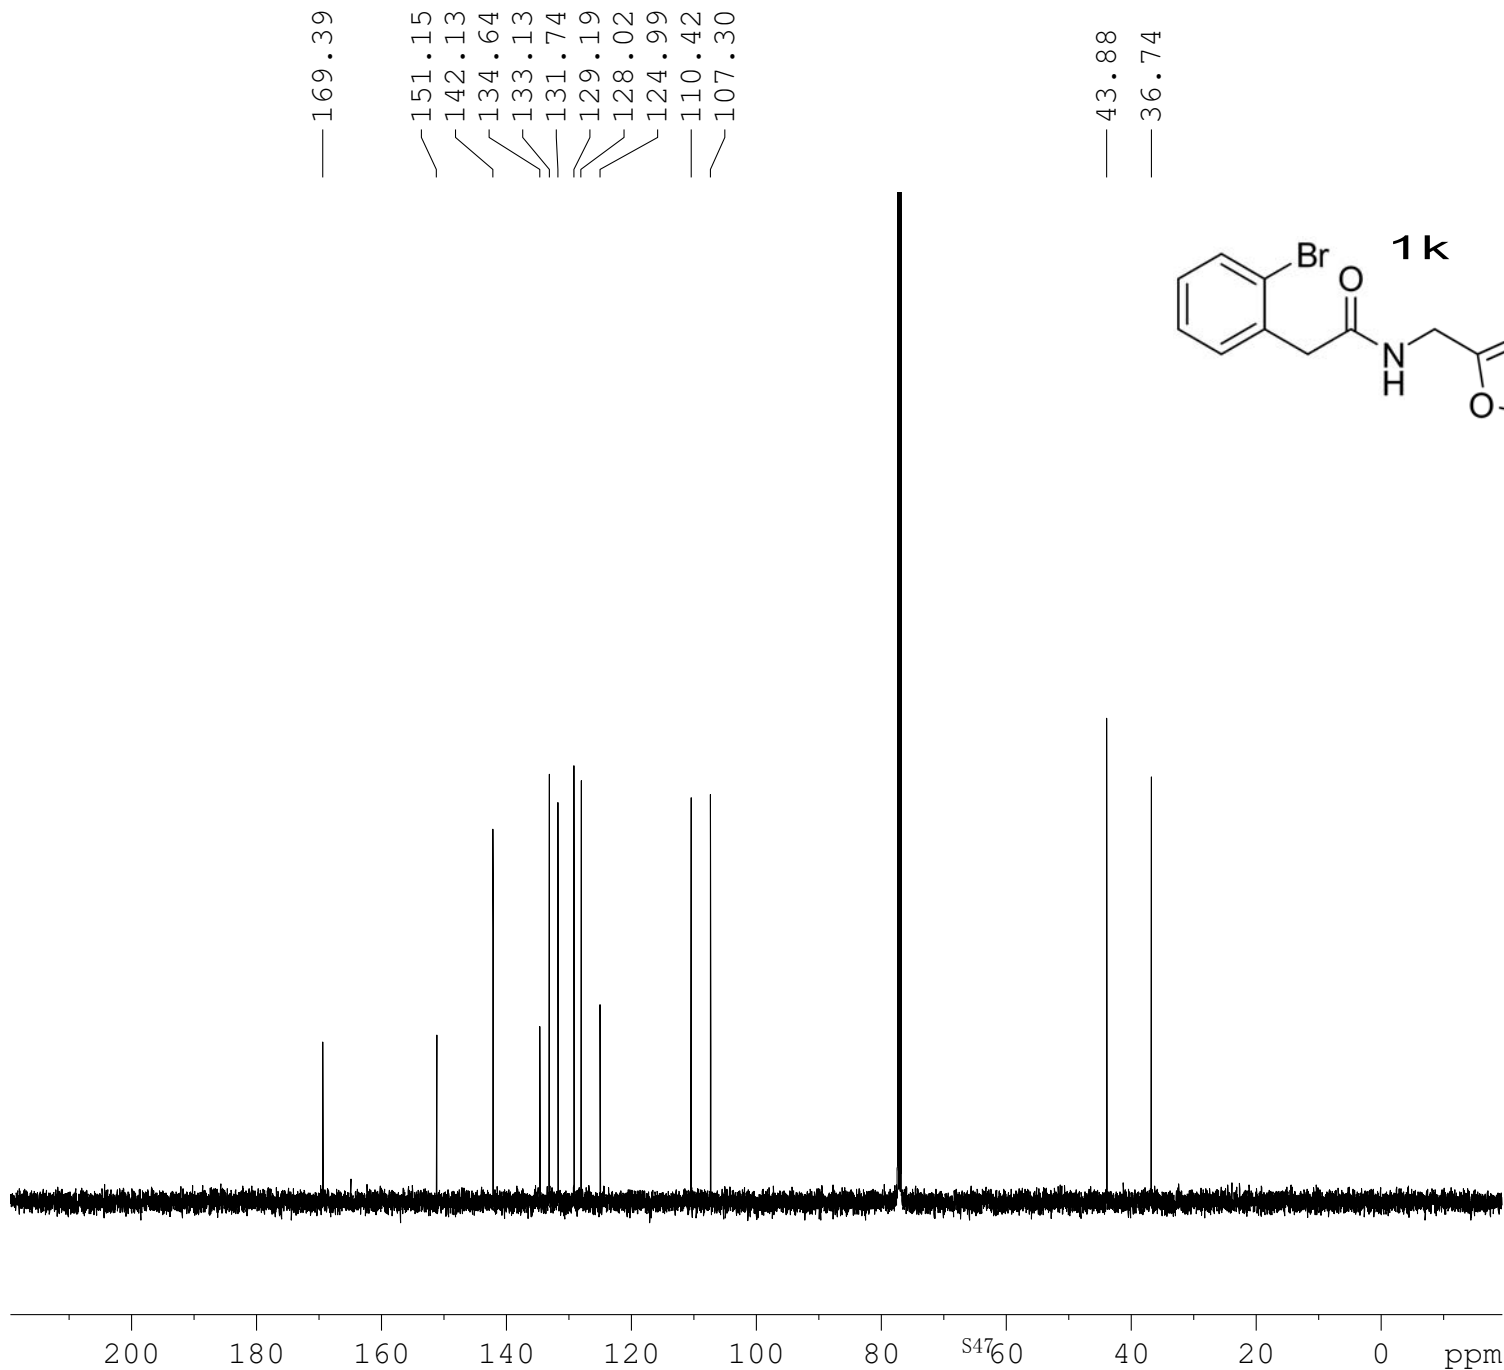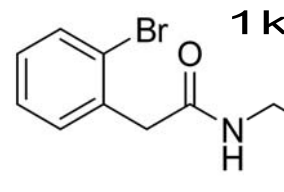

```
NAME          xb20120720
EXPNO          6
PROCNO         1
Date_          20120720
Time           15.46
INSTRUM        spect
PROBHD         5 mm PATXO 19F
PULPROG        zgpg30
TD             65536
SOLVENT        CDC13
NS             128
DS             4
SWH            30030.029 Hz
FIDRES         0.458222 Hz
AQ             1.0912410 sec
RG             143.7
DW             16.650 usec
DE             6.00 usec
TE             297.2 K
D1             2.00000000 sec
d11            0.03000000 sec
DELTA          1.89999998 sec
TD0            1
```

```
===== CHANNEL f1 =====
NUC1           13C
P1             9.50 usec
PL1            -0.50 dB
SFO1           125.7703643 MHz
```

```
===== CHANNEL f2 =====
CPDPRG2        waltz16
NUC2           1H
PCPD2          80.00 usec
PL2            1.00 dB
PL12           16.31 dB
PL13           16.50 dB
SFO2           500.1320005 MHz
SI             32768
SF             125.7577890 MHz
WDW            EM
SSB            0
LB             1.00 Hz
GB             0
PC             1.40
```

SUNJ-1-308-3  
PROTON CDC13 D:\ deng 8

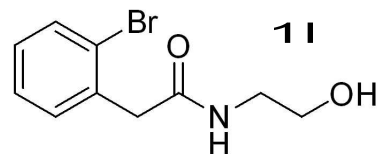

7.585  
7.569  
7.347  
7.335  
7.332  
7.315  
7.301  
7.286  
7.177  
7.174  
7.160  
7.147  
7.144  
6.077

3.713  
3.675  
3.665  
3.655  
3.389  
3.379  
3.369  
3.360  
2.625

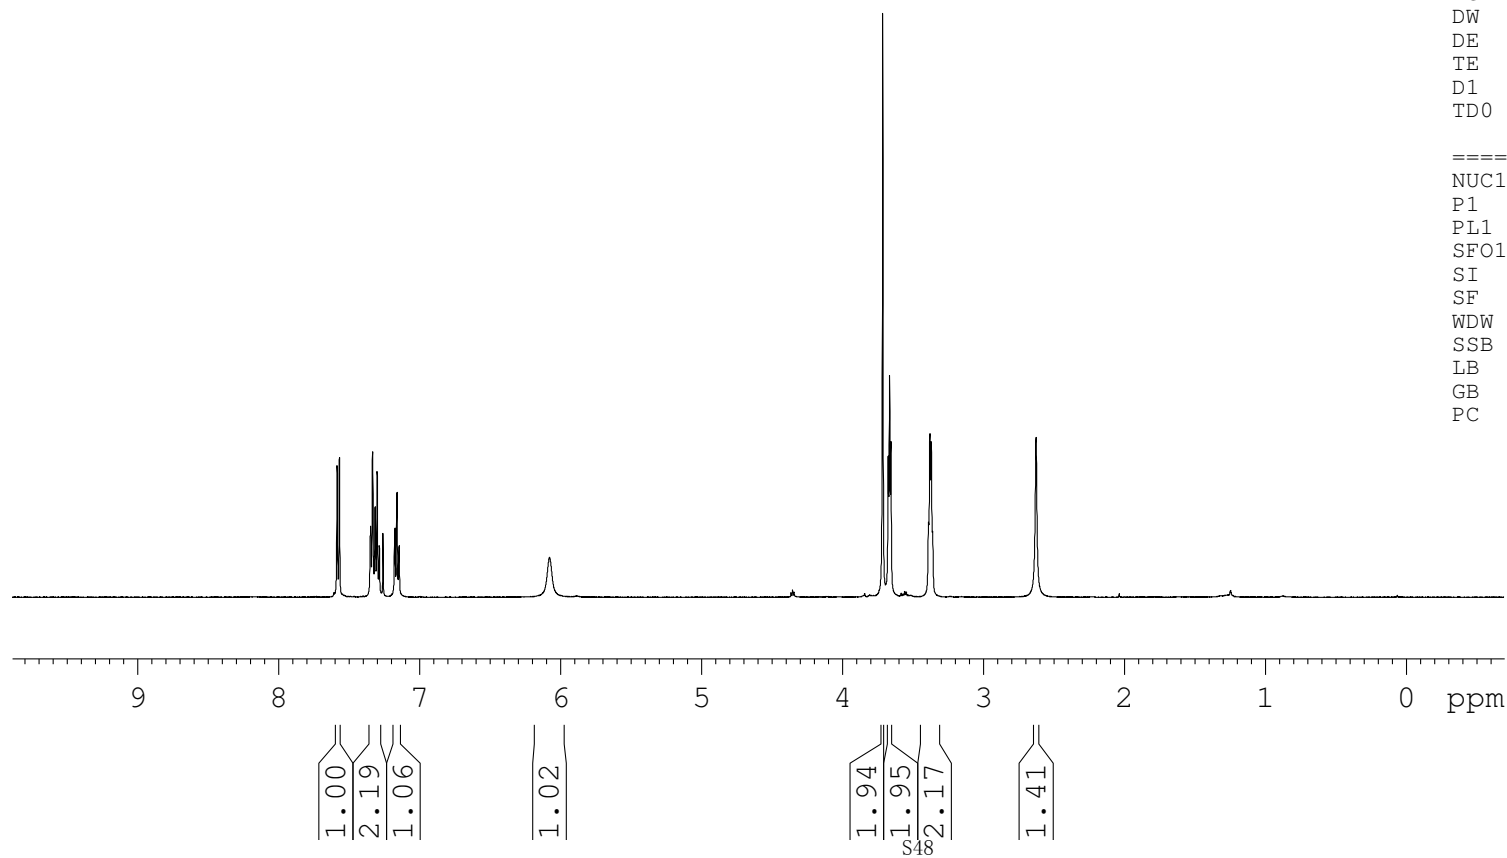

```
NAME          XB20111012
EXPNO          1
PROCNO         1
Date_          20111012
Time           8.28
INSTRUM        spect
PROBHD         5 mm PATXO 19F
PULPROG        zg30
TD             65536
SOLVENT        CDC13
NS             16
DS             2
SWH            10330.578 Hz
FIDRES         0.157632 Hz
AQ            3.1720407 sec
RG             203.2
DW            48.400 usec
DE             6.00 usec
TE            295.6 K
D1            1.00000000 sec
TD0            1

===== CHANNEL f1 =====
NUC1           1H
P1            14.66 usec
PL1           1.00 dB
SFO1          500.1330885 MHz
SI            32768
SF            500.1300130 MHz
WDW           no
SSB           0
LB            0.00 Hz
GB            0
PC            1.00
```



SunJ-1-308-3  
C13CPD CDC13 D:\ deng 42

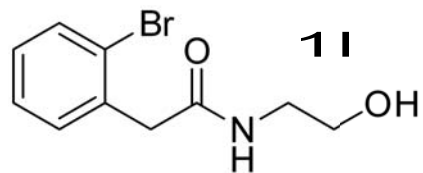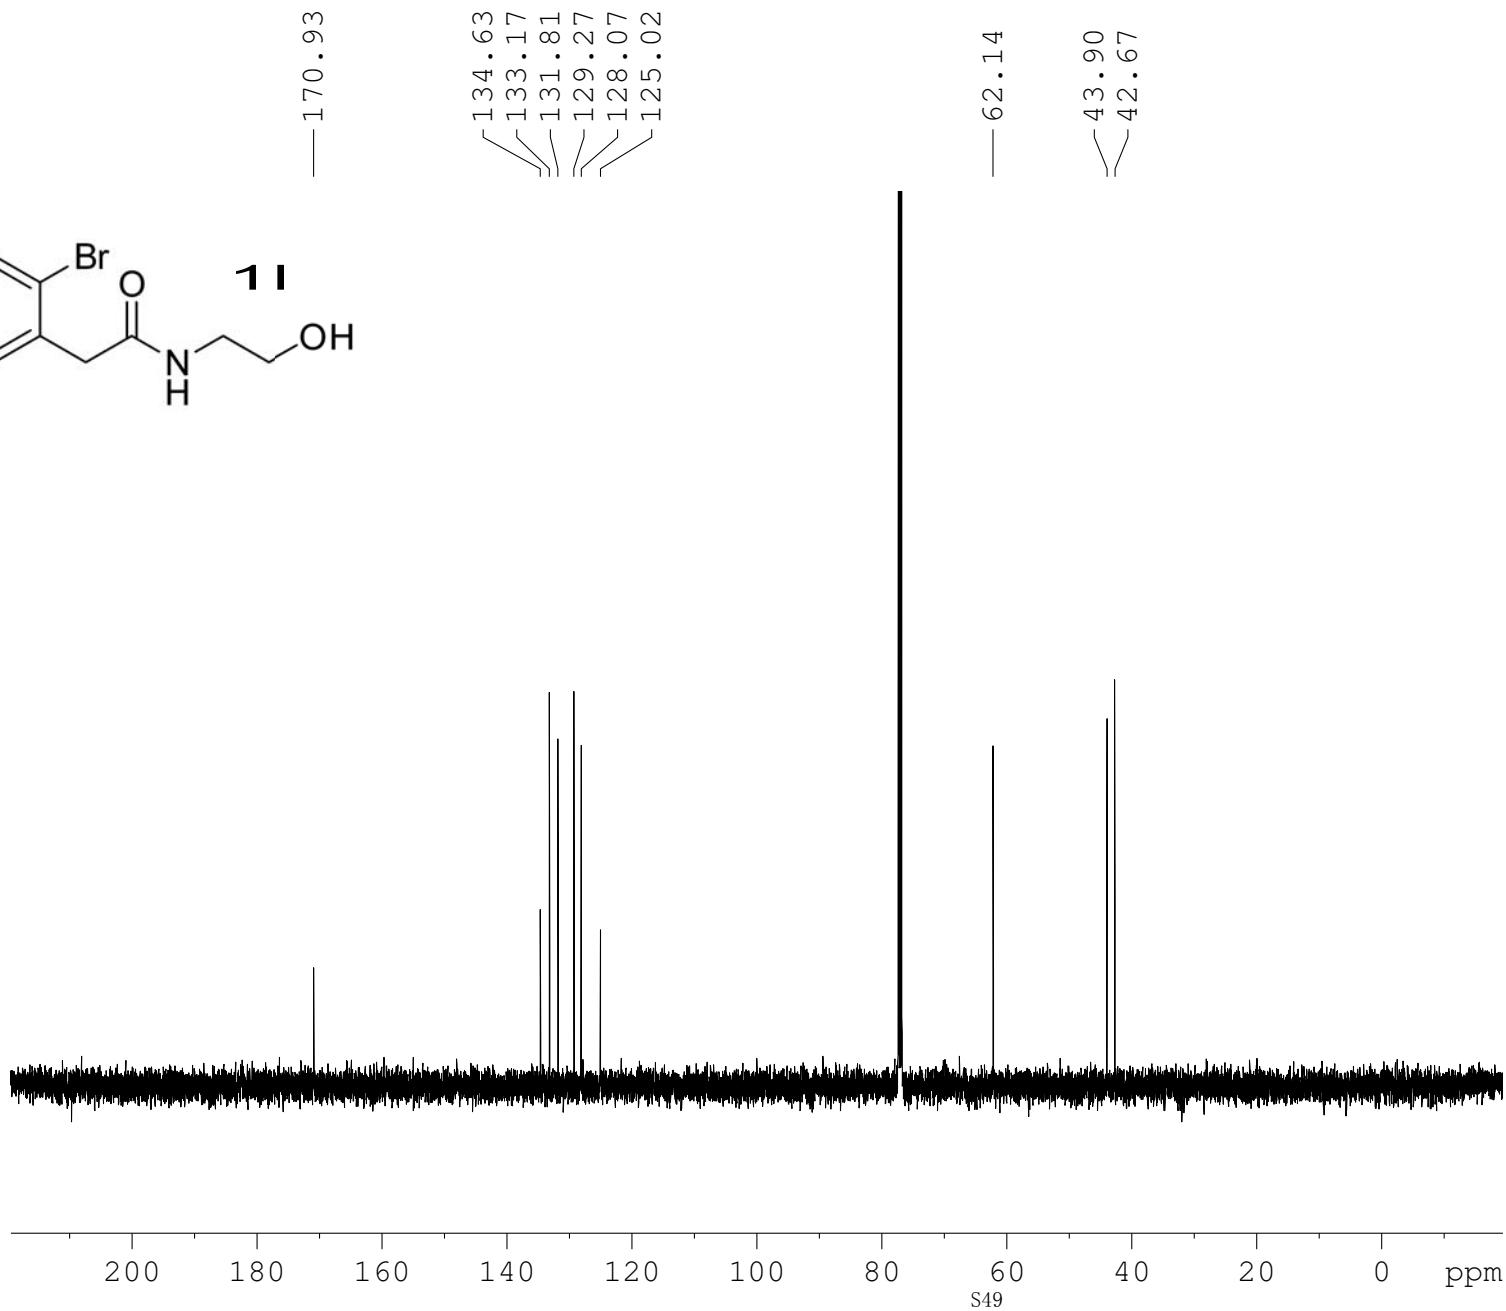

```
NAME          xb20111013
EXPNO         5
PROCNO        1
Date_         20111013
Time          10.33
INSTRUM       spect
PROBHD        5 mm PATXO 19F
PULPROG       zgpg30
TD            65536
SOLVENT       CDC13
NS            128
DS            4
SWH           30030.029 Hz
FIDRES        0.458222 Hz
AQ            1.0912410 sec
RG            181
DW            16.650 usec
DE            6.00 usec
TE            297.3 K
D1            2.00000000 sec
d11           0.03000000 sec
DELTA         1.89999998 sec
TD0           1
```

```
===== CHANNEL f1 =====
NUC1          13C
P1            9.50 usec
PL1           -0.50 dB
SFO1          125.7703643 MHz
```

```
===== CHANNEL f2 =====
CPDPRG2       waltz16
NUC2          1H
PCPD2         80.00 usec
PL2           2.00 dB
PL12          16.50 dB
PL13          16.50 dB
SFO2          500.1320005 MHz
SI            32768
SF            125.7577890 MHz
WDW           EM
SSB           0
LB            1.00 Hz
GB            0
PC            1.40
```

SunJ-2-104  
PROTON CDC13 D:\ deng 7

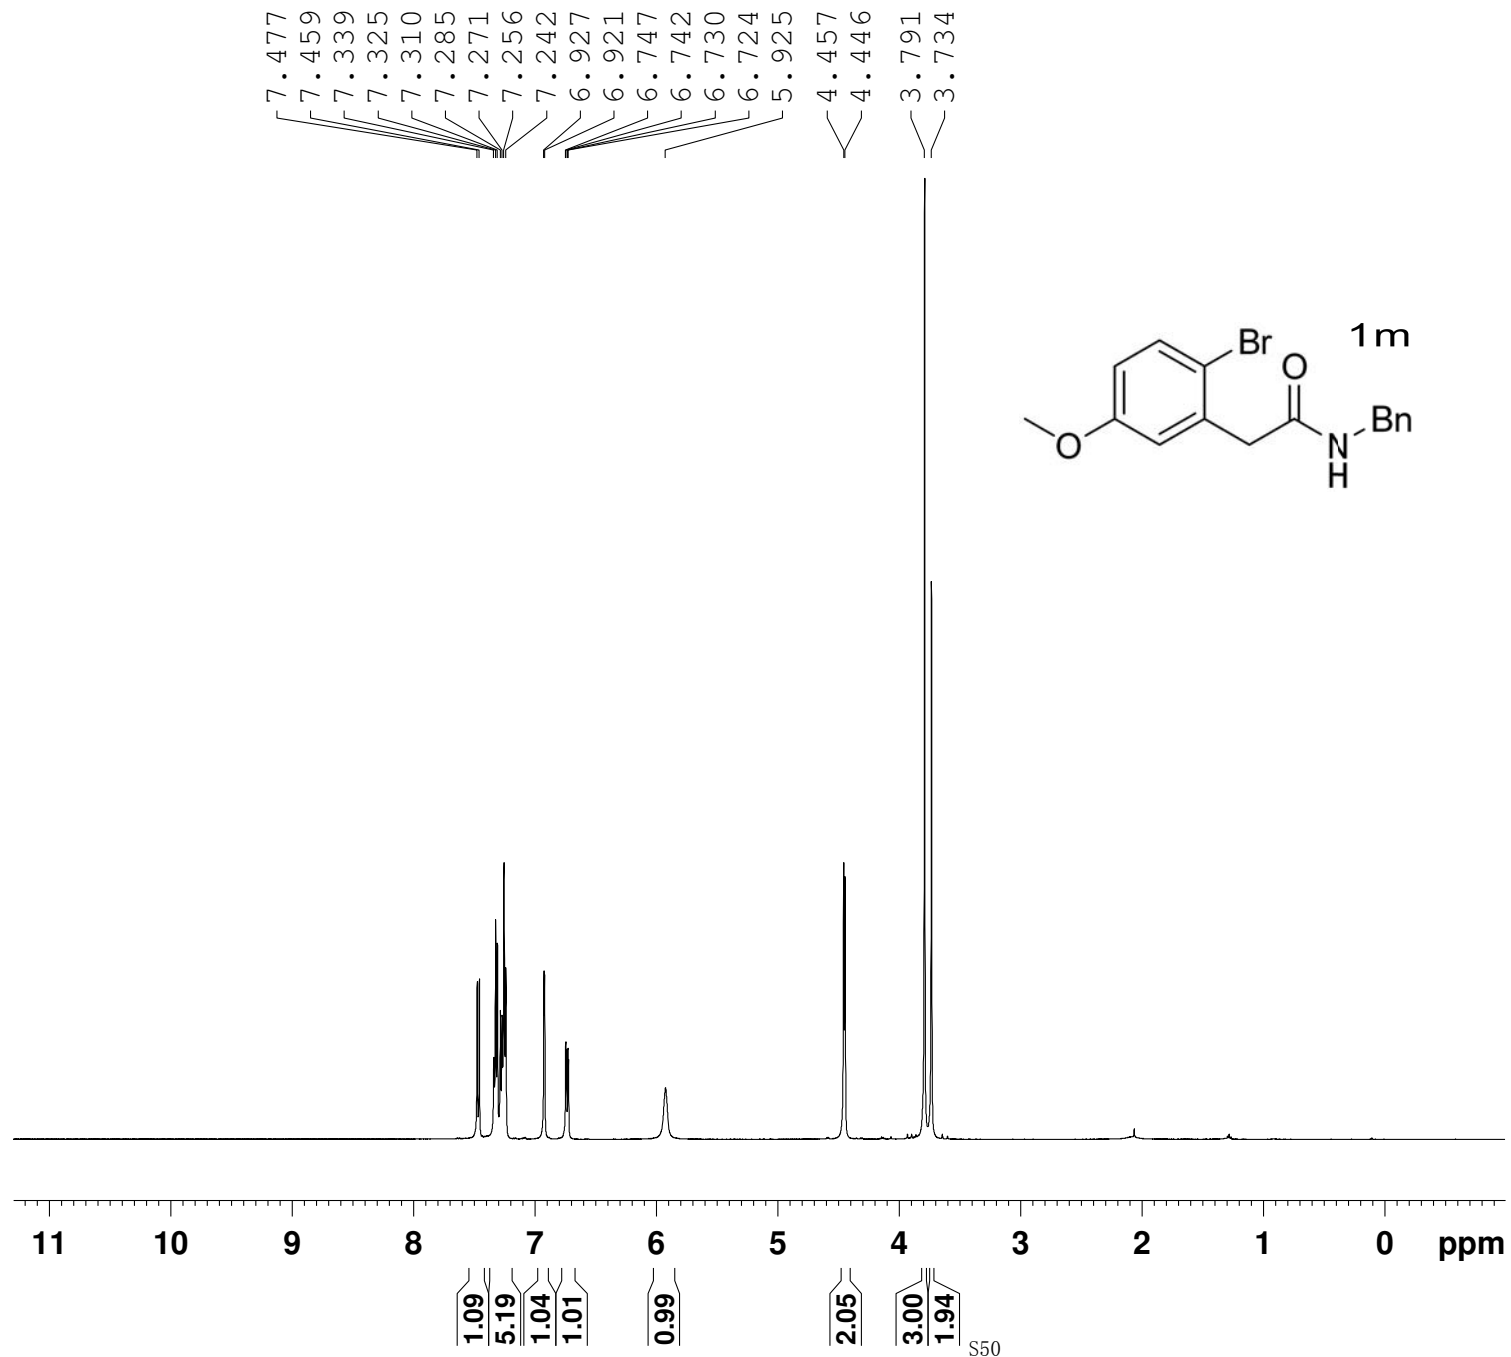

NAME XB20111222  
EXPNO 10  
PROCNO 1  
Date\_ 20111222  
Time 16.25  
INSTRUM spect  
PROBHD 5 mm PATXO 19F  
PULPROG zg30  
TD 65536  
SOLVENT CDC13  
NS 16  
DS 2  
SWH 10330.578 Hz  
FIDRES 0.157632 Hz  
AQ 3.1720407 sec  
RG 128  
DW 48.400 usec  
DE 6.00 usec  
TE 293.8 K  
D1 1.00000000 sec  
TD0 1

==== CHANNEL f1 =====  
NUC1 1H  
P1 14.66 usec  
PL1 1.00 dB  
SFO1 500.1330885 MHz  
SI 32768  
SF 500.1300000 MHz  
WDW no  
SSB 0  
LB 0.00 Hz  
GB 0  
PC 1.00

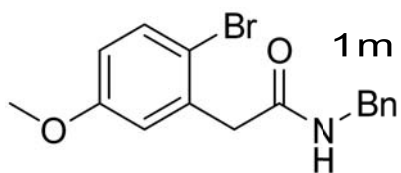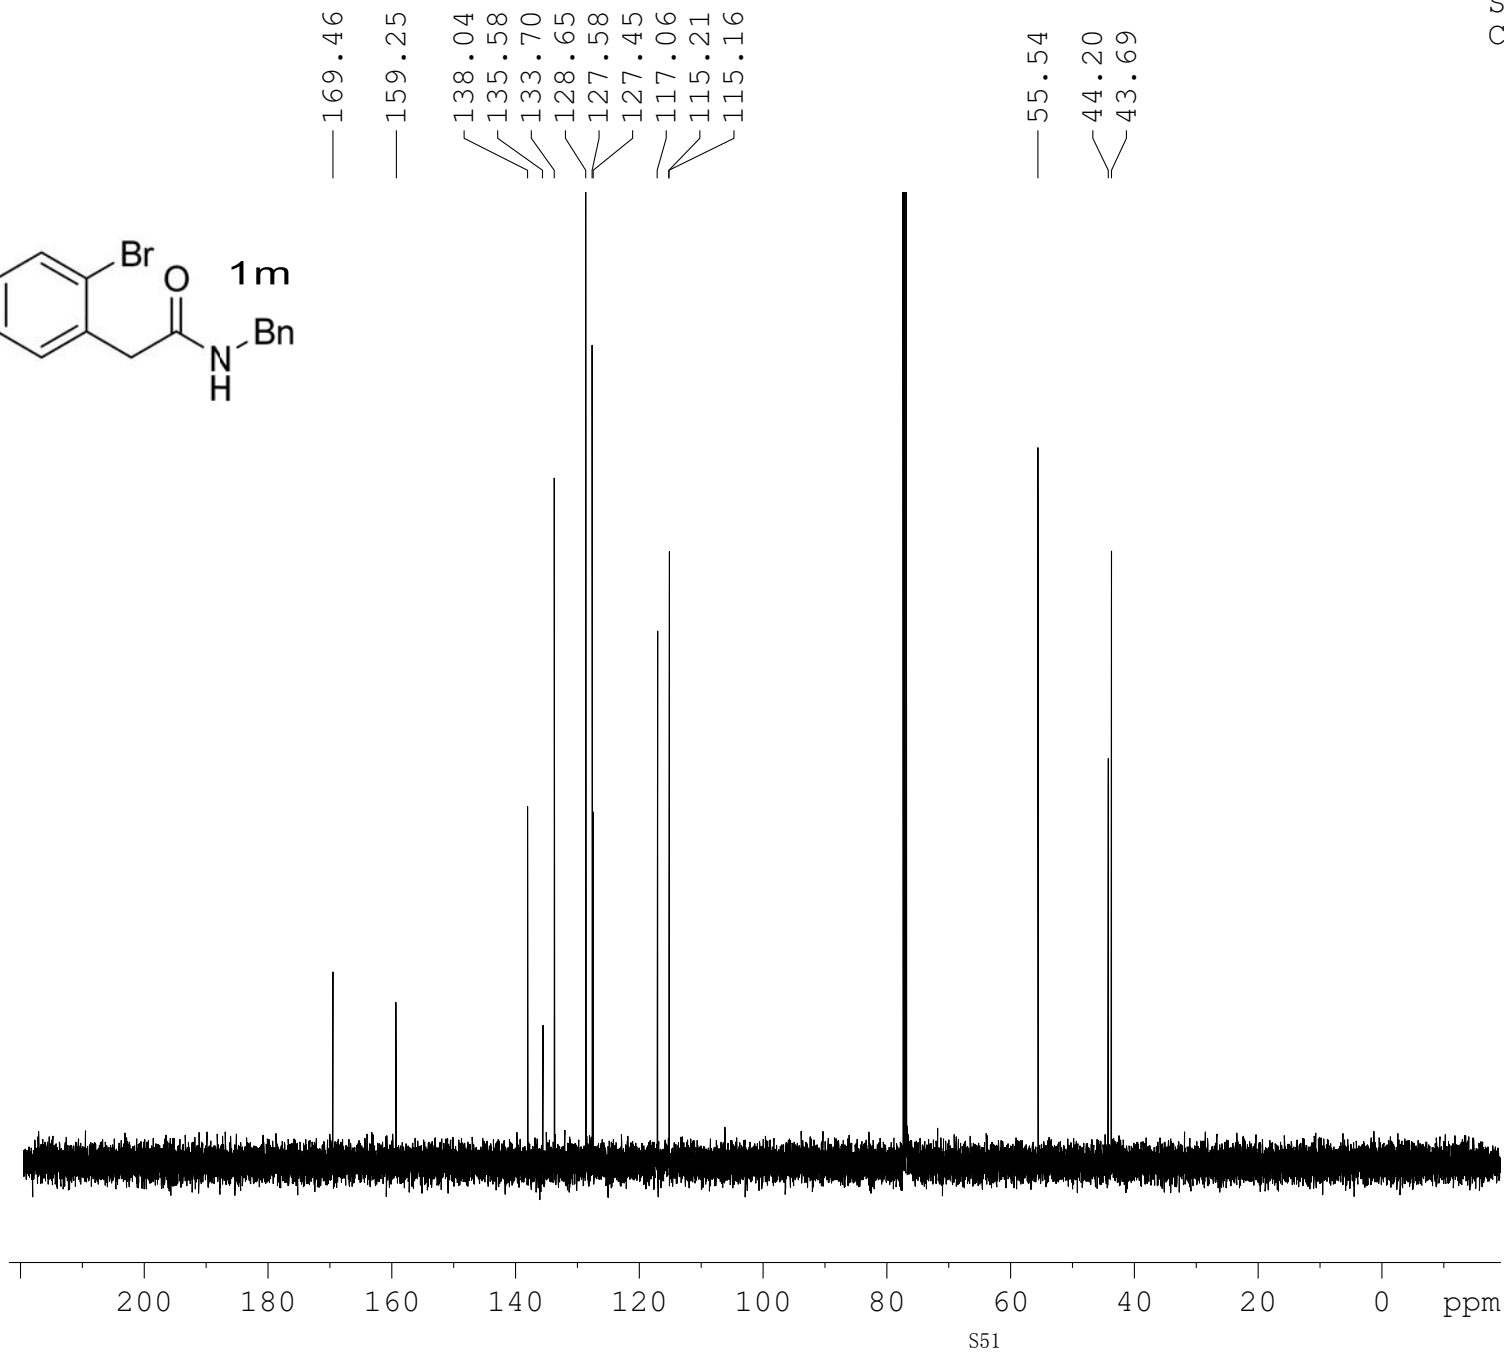

SUNJ-2-104  
C13CPD CDC13 D:\\ deng 14

```
NAME      XB20111223-1
EXPNO     9
PROCNO    1
Date_     20111223
Time      15.10
INSTRUM   spect
PROBHD    5 mm PATXO 19F
PULPROG   zgpg30
TD        65536
SOLVENT   CDC13
NS        128
DS        4
SWH       30030.029 Hz
FIDRES    0.458222 Hz
AQ        1.0912410 sec
RG        114
DW        16.650 usec
DE        6.00 usec
TE        295.0 K
D1        2.00000000 sec
d11       0.03000000 sec
DELTA     1.89999998 sec
TD0       1
```

```
===== CHANNEL f1 =====
NUC1      13C
P1        9.50 usec
PL1       -0.50 dB
SFO1     125.7703643 MHz
```

```
===== CHANNEL f2 =====
CPDPRG2   waltz16
NUC2      1H
PCPD2     80.00 usec
PL2       2.00 dB
PL12     16.50 dB
PL13     16.50 dB
SFO2     500.1320005 MHz
SI        32768
SF        125.7577890 MHz
WDW       no
SSB       0
LB        0.00 Hz
GB        0
PC        1.40
```

SUNJ-2-138-1  
PROTON CDC13 D:\ \ deng 60

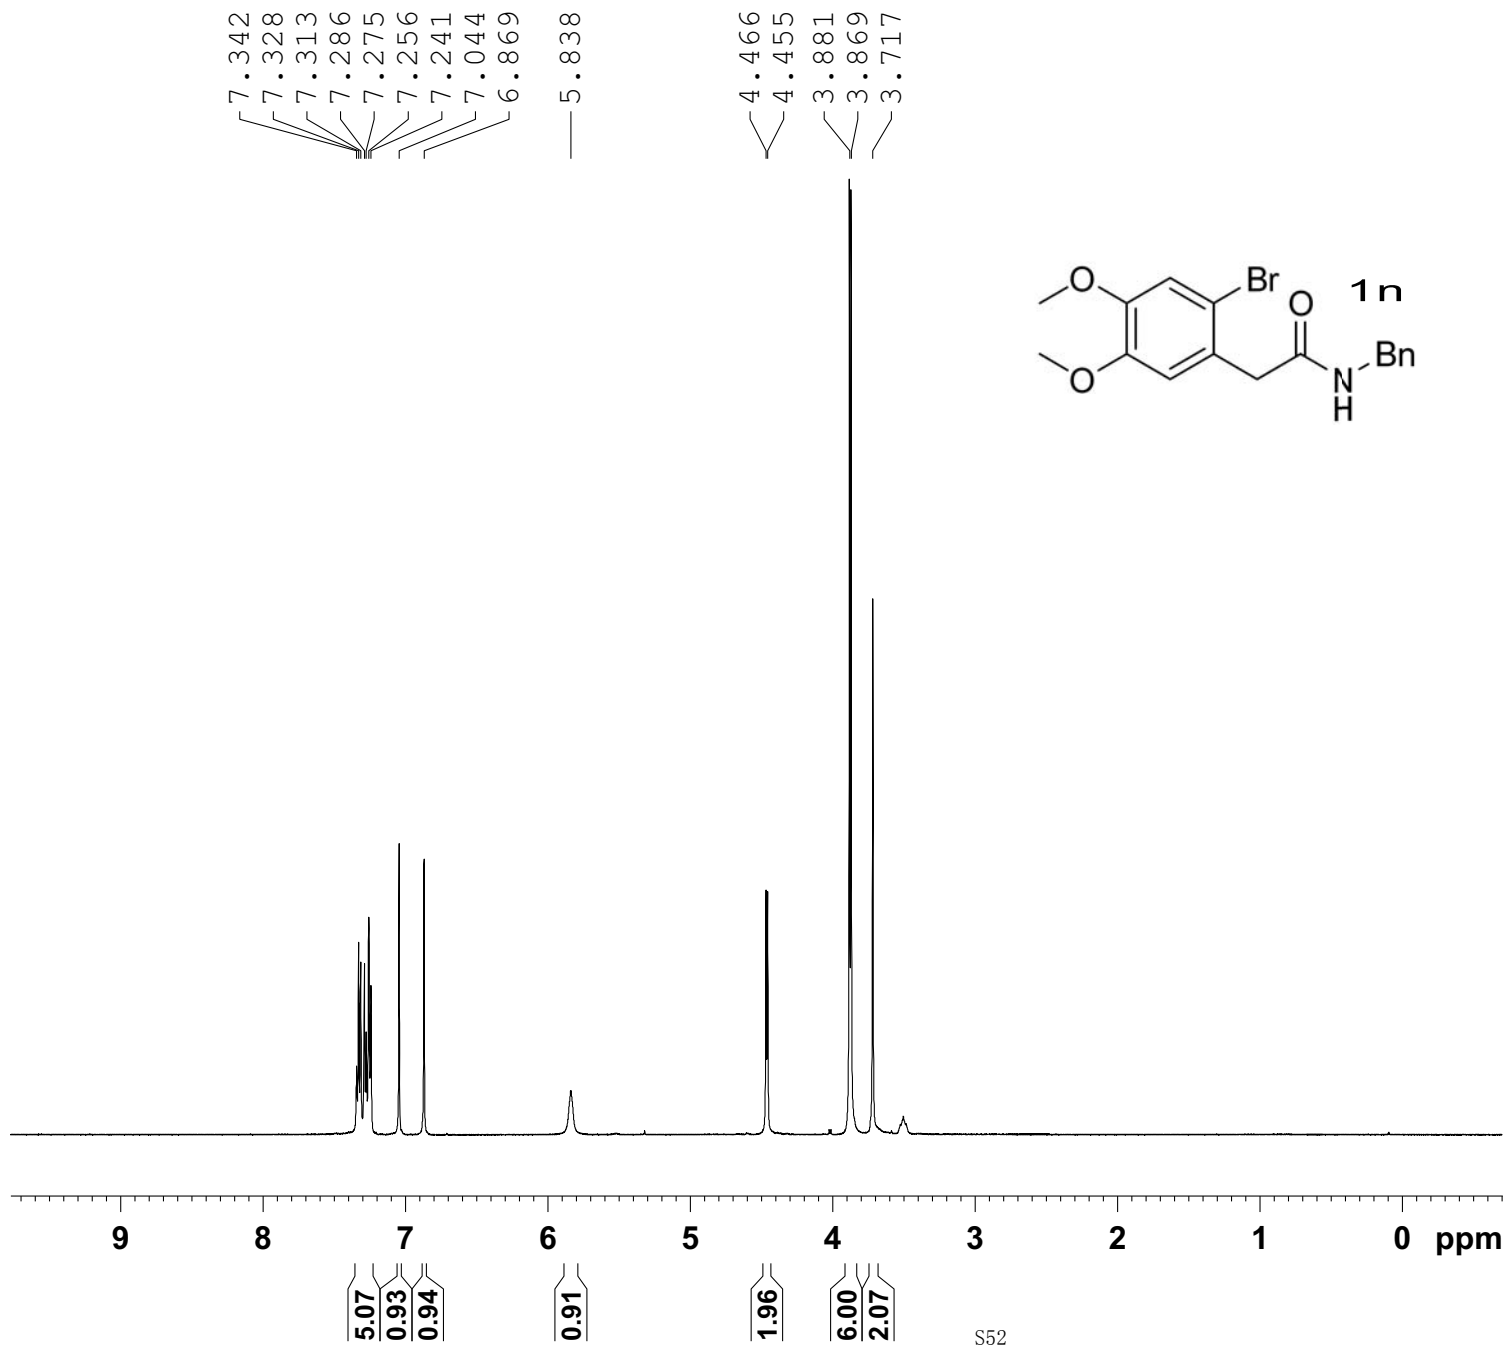

```
NAME          xb20120306
EXPNO          1
PROCNO         1
Date_          20120306
Time_          13.04
INSTRUM        spect
PROBHD         5 mm PATXO 19F
PULPROG        zg30
TD             65536
SOLVENT        CDC13
NS             16
DS             2
SWH            10330.578 Hz
FIDRES         0.157632 Hz
AQ            3.1720407 sec
RG             287.4
DW            48.400 usec
DE            6.00 usec
TE            294.0 K
D1            1.00000000 sec
TD0           1
```

```
===== CHANNEL f1 =====
NUC1           1H
P1             13.70 usec
PL1            1.00 dB
SFO1          500.1330885 MHz
SI            32768
SF            500.1300000 MHz
WDW            no
SSB            0
LB            0.00 Hz
GB            0
PC            1.00
```

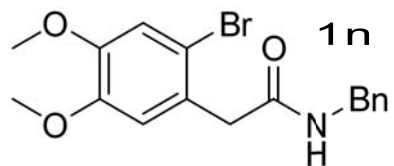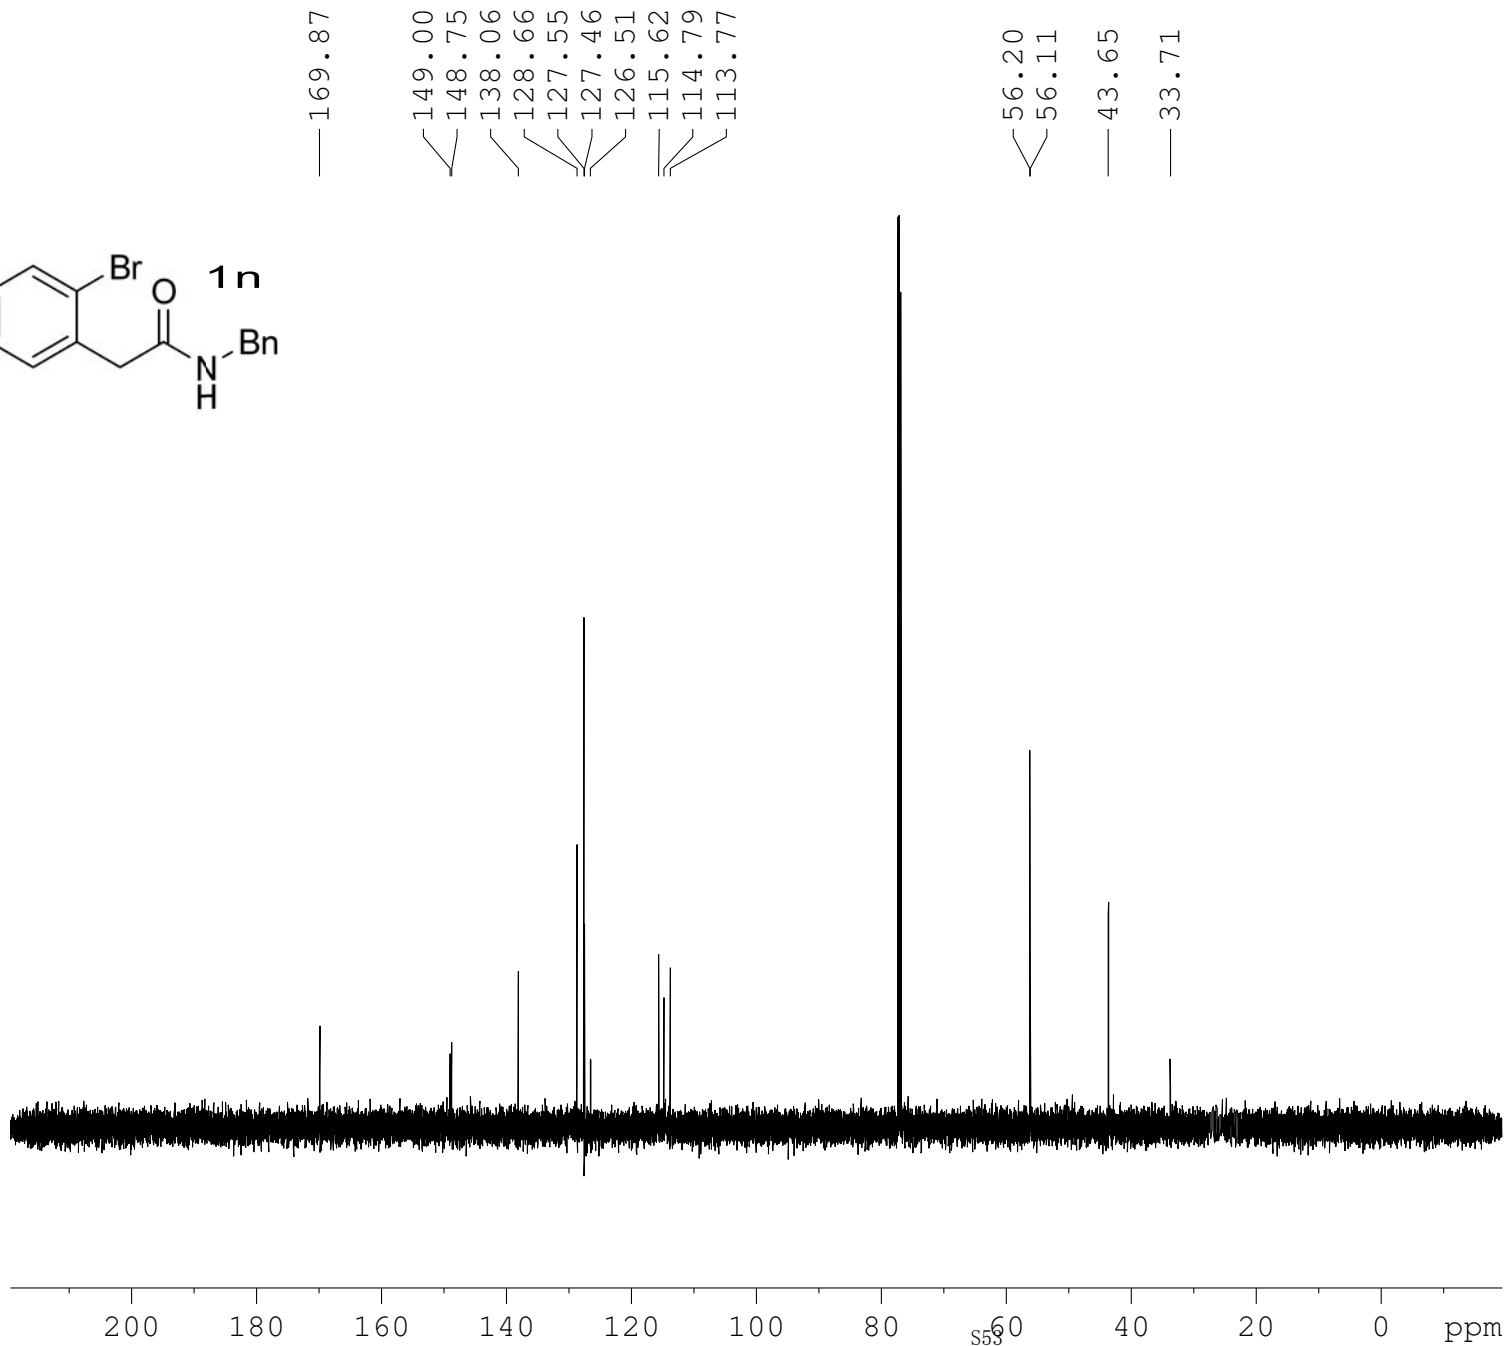

SUNJ-2-151-1  
C13CPD CDC13 D:\\ deng 54

```
NAME          XB20120315
EXPNO          7
PROCNO         1
Date_          20120315
Time           17.00
INSTRUM        spect
PROBHD         5 mm PATXO 19F
PULPROG        zgpg30
TD             65536
SOLVENT        CDC13
NS             128
DS             4
SWH            30030.029 Hz
FIDRES         0.458222 Hz
AQ            1.0912410 sec
RG            114
DW            16.650 usec
DE            6.00 usec
TE            295.4 K
D1            2.0000000 sec
d11           0.0300000 sec
DELTA         1.89999998 sec
TD0           1
```

```
===== CHANNEL f1 =====
NUC1           13C
P1            9.50 usec
PL1           -0.50 dB
SFO1          125.7703643 MHz
```

```
===== CHANNEL f2 =====
CPDPRG2        waltz16
NUC2           1H
PCPD2          80.00 usec
PL2            1.00 dB
PL12           16.33 dB
PL13           16.50 dB
SFO2          500.1320005 MHz
SI            32768
SF            125.7577890 MHz
WDW            no
SSB            0
LB            0.00 Hz
GB            0
PC            1.40
```

SUNJ-2-138-2

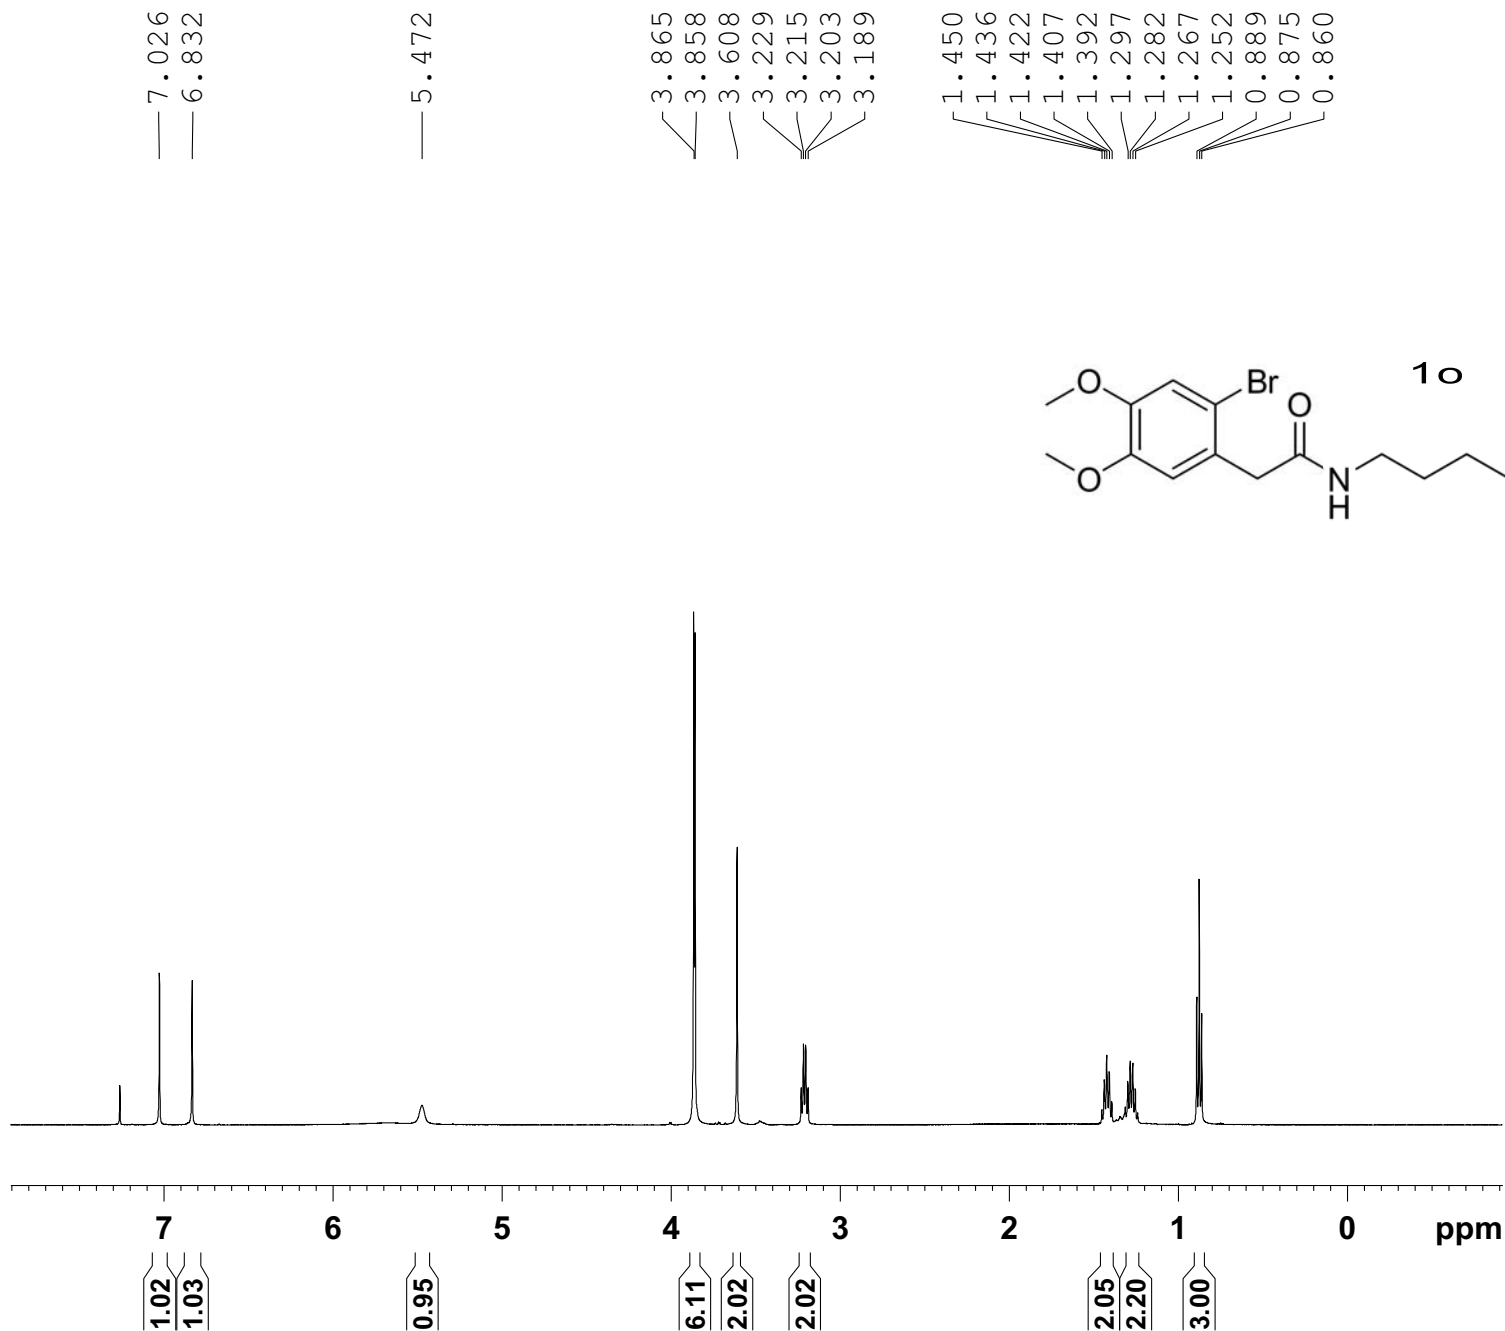

NAME xb20120306  
EXPNO 2  
PROCNO 1  
Date\_ 20120306  
Time 13.10  
INSTRUM spect  
PROBHD 5 mm PATXO 19F  
PULPROG zg30  
TD 65536  
SOLVENT CDC13  
NS 16  
DS 2  
SWH 10330.578 Hz  
FIDRES 0.157632 Hz  
AQ 3.1720407 sec  
RG 228.1  
DW 48.400 usec  
DE 6.00 usec  
TE 294.1 K  
D1 1.00000000 sec  
TD0 1

==== CHANNEL f1 =====  
NUC1 1H  
P1 13.70 usec  
PL1 1.00 dB  
SFO1 500.1330885 MHz  
SI 32768  
SF 500.1300128 MHz  
WDW no  
SSB 0  
LB 0.00 Hz  
GB 0  
PC 1.00

SUNJ-2-148-3  
C13CPD CDC13 D:\ \ deng 55

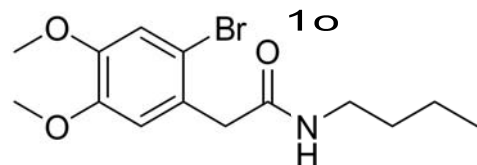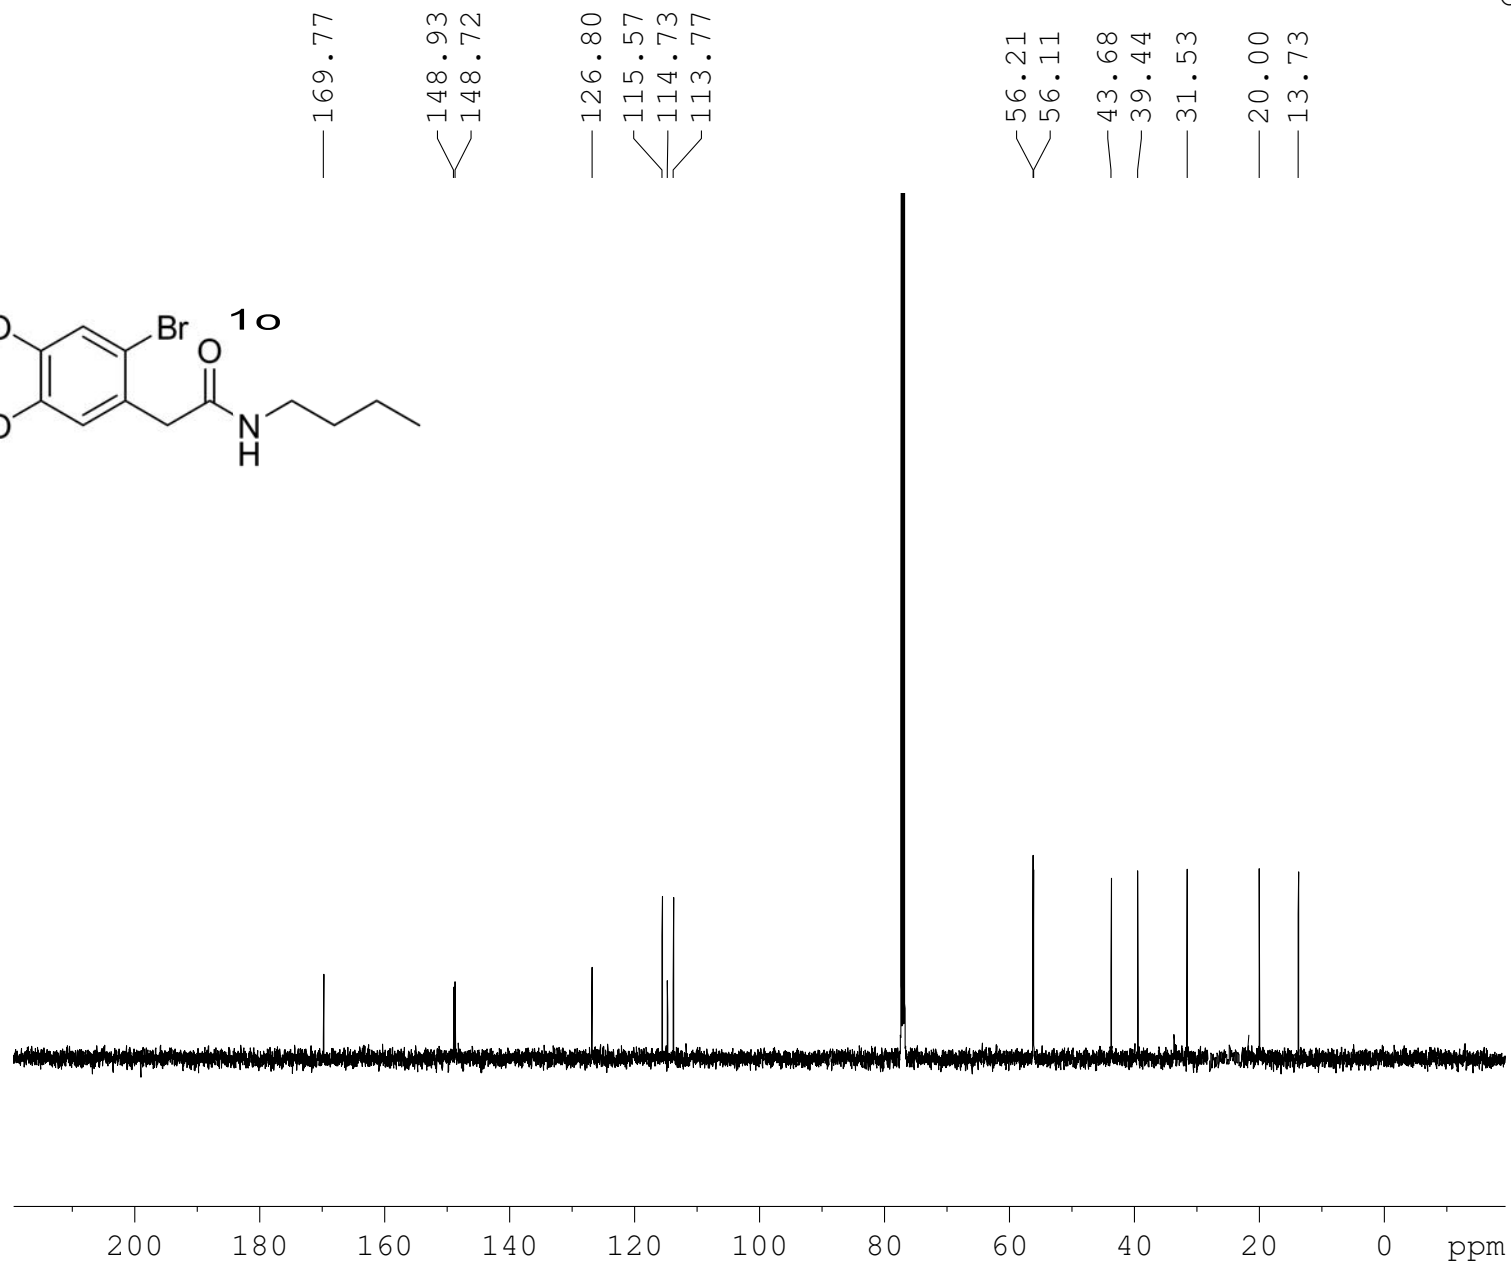

```
NAME          XB20120314
EXPNO         5
PROCNO        1
Date_         20120314
Time          10.14
INSTRUM       spect
PROBHD        5 mm PATXO 19F
PULPROG       zgpg30
TD            65536
SOLVENT       CDC13
NS            128
DS            4
SWH           30030.029 Hz
FIDRES        0.458222 Hz
AQ            1.0912410 sec
RG            228.1
DW            16.650 usec
DE            6.00 usec
TE            295.5 K
D1            2.00000000 sec
d11           0.03000000 sec
DELTA         1.89999998 sec
TD0           1
```

```
===== CHANNEL f1 =====
NUC1          13C
P1            9.50 usec
PL1           -0.50 dB
SFO1          125.7703643 MHz
```

```
===== CHANNEL f2 =====
CPDPRG2       waltz16
NUC2          1H
PCPD2         80.00 usec
PL2           1.00 dB
PL12          16.33 dB
PL13          16.50 dB
SFO2          500.1320005 MHz
SI            32768
SF            125.7577890 MHz
WDW           EM
SSB           0
LB            2.00 Hz
GB            0
PC            1.40
```

7.701  
7.685  
7.509  
7.492  
7.351  
7.337  
7.321  
7.316  
7.299  
7.283  
7.250  
7.236  
7.058  
7.053  
6.819  
6.814  
6.802  
6.797  
5.862

4.436  
4.425

3.663

2.461

SUNJ-2-113A  
PROTON CDC13 D:\ deng 56

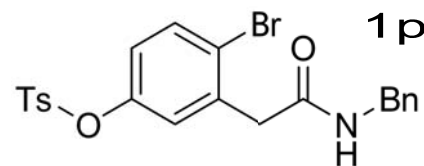

NAME xb20111229  
EXPNO 1  
PROCNO 1  
Date\_ 20111229  
Time 10.06  
INSTRUM spect  
PROBHD 5 mm PATXO 19F  
PULPROG zg30  
TD 65536  
SOLVENT CDC13  
NS 8  
DS 2  
SWH 10330.578 Hz  
FIDRES 0.157632 Hz  
AQ 3.172047 sec  
RG 143.7  
DW 48.400 usec  
DE 6.00 usec  
TE 293.8 K  
D1 1.00000000 sec  
TD0 1

===== CHANNEL f1 =====  
NUC1 1H  
P1 14.66 usec  
PL1 1.00 dB  
SFO1 500.1330885 MHz  
SI 32768  
SF 500.1300000 MHz  
WDW no  
SSB 0  
LB 0.00 Hz  
GB 0  
PC 1.00

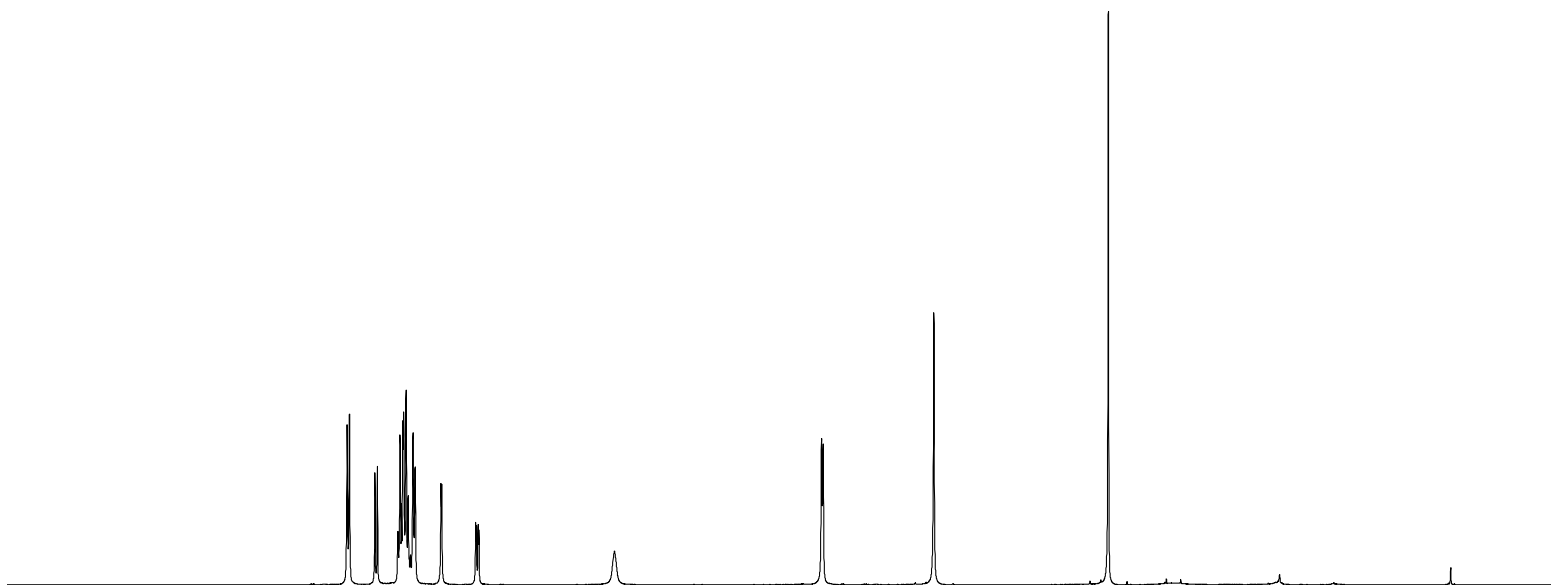

1.91  
0.97  
7.06  
0.94  
0.94

0.94

2.01

1.97

3.00



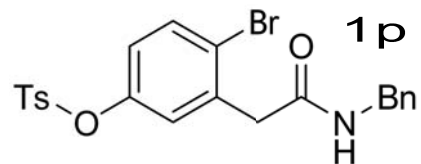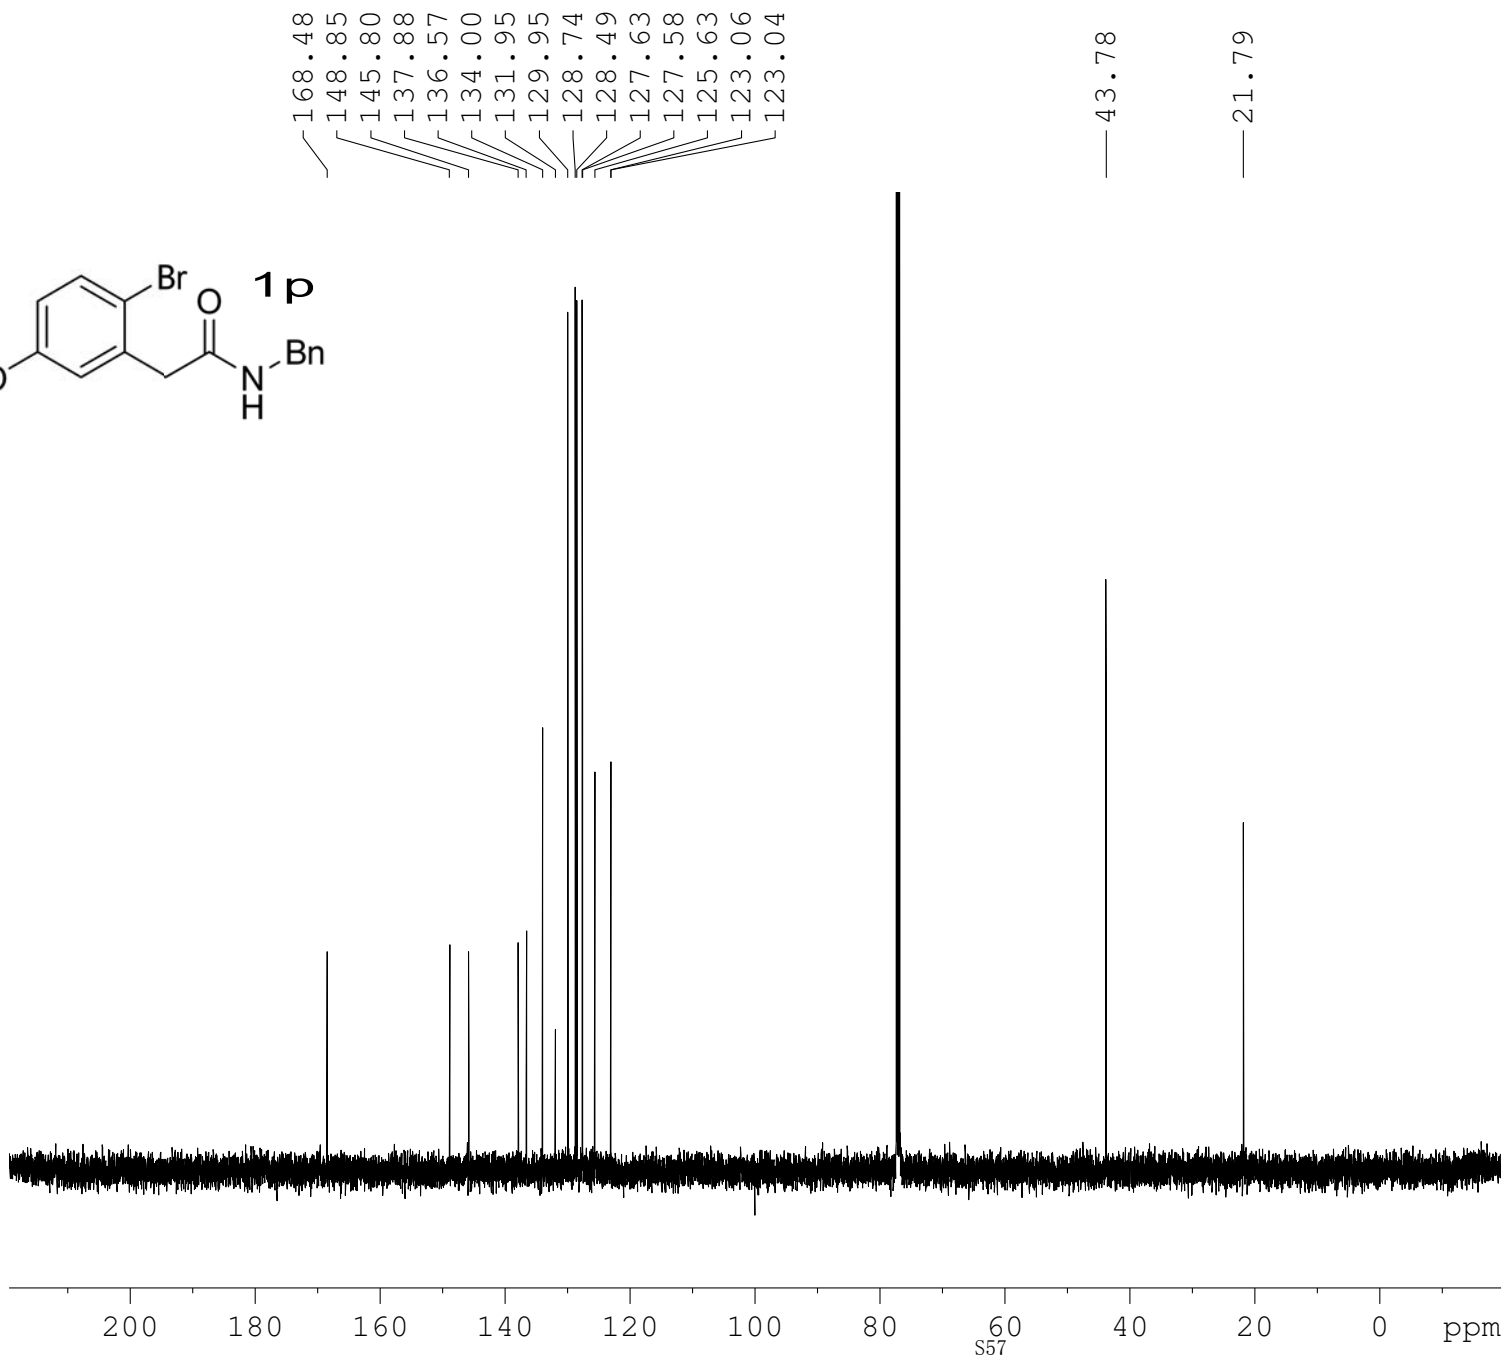

SUNJ-2-113A  
C13CPD CDC13 D:\ deng 56

NAME xb20111229  
EXPNO 2  
PROCNO 1  
Date\_ 20111229  
Time 10.17  
INSTRUM spect  
PROBHD 5 mm PATXO 19F  
PULPROG zgpg30  
TD 65536  
SOLVENT CDC13  
NS 128  
DS 4  
SWH 30030.029 Hz  
FIDRES 0.458222 Hz  
AQ 1.0912410 sec  
RG 101.6  
DW 16.650 usec  
DE 6.00 usec  
TE 295.0 K  
D1 2.00000000 sec  
TD0 1

==== CHANNEL f1 =====  
NUC1 13C  
P1 9.50 usec  
PL1 -0.50 dB  
SFO1 125.7703643 MHz  
SI 32768  
SF 125.7577890 MHz  
WDW EM  
SSB 0  
LB 1.00 Hz  
GB 0  
PC 1.40

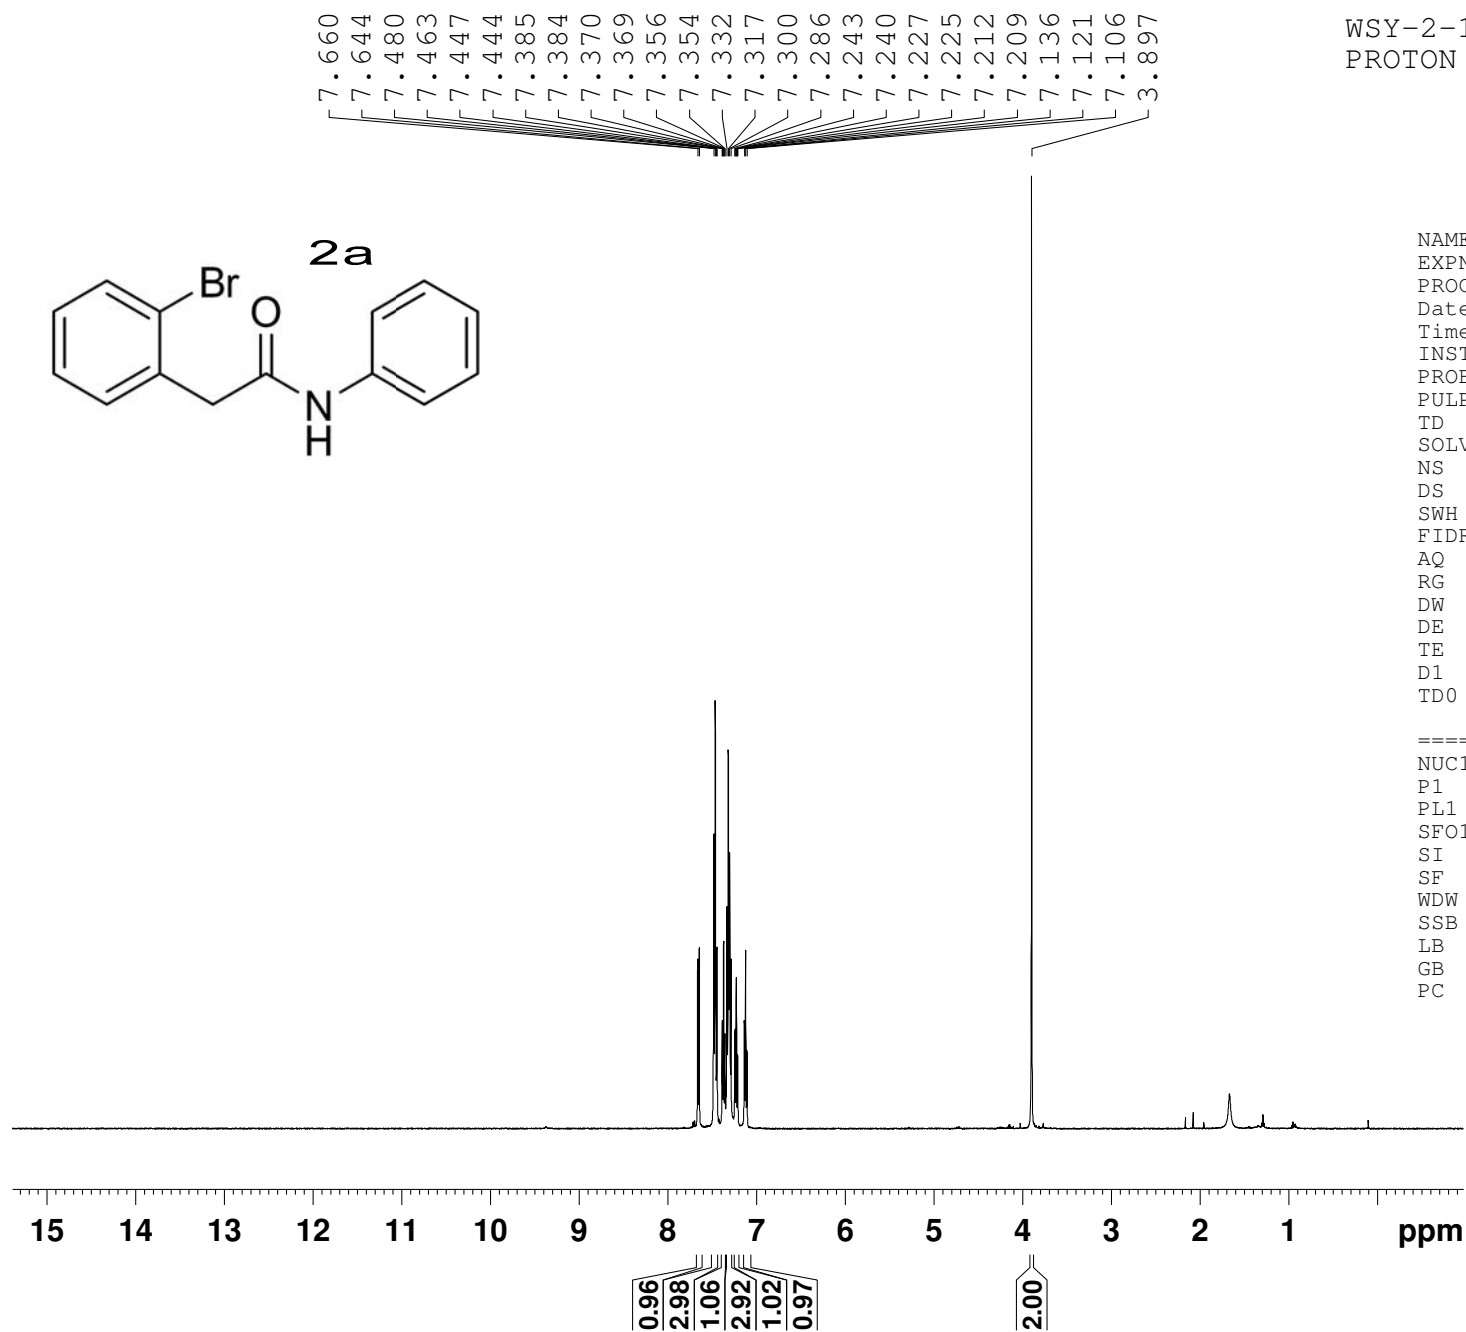

WSY-2-158-13  
PROTON CDCl3 D:\\ deng 31

NAME XB20080222  
EXPNO 1  
PROCNO 1  
Date\_ 20080222  
Time 13.49  
INSTRUM spect  
PROBHD 5 mm PATXO 19F  
PULPROG zg30  
TD 65536  
SOLVENT CDCl3  
NS 16  
DS 2  
SWH 10330.578 Hz  
FIDRES 0.157632 Hz  
AQ 3.1720407 sec  
RG 322.5  
DW 48.400 usec  
DE 6.00 usec  
TE 295.0 K  
D1 1.00000000 sec  
TD0 1

===== CHANNEL f1 =====  
NUC1 1H  
P1 14.50 usec  
PL1 2.00 dB  
SFO1 500.1330885 MHz  
SI 32768  
SF 500.1300000 MHz  
WDW no  
SSB 0  
LB 0.00 Hz  
GB 0  
PC 1.00

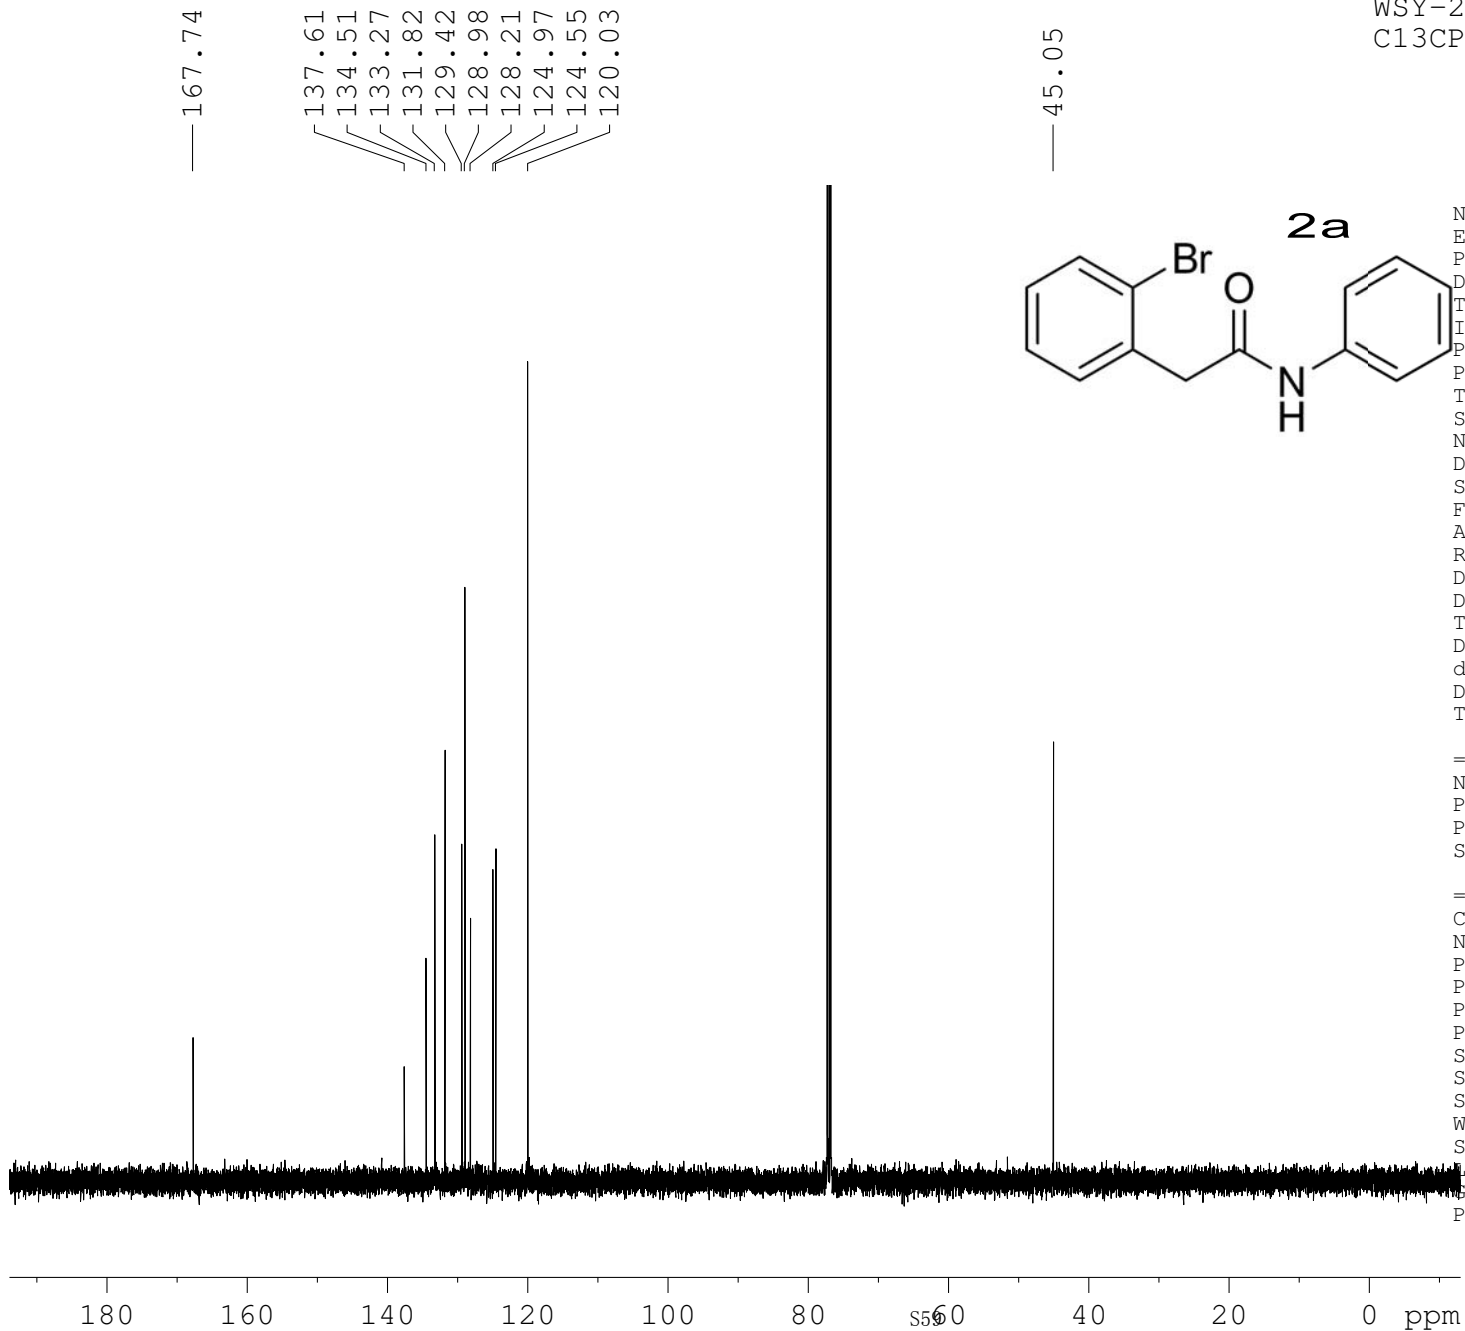

WSY-2-158-13  
C13CPD CDC13 D:\\ deng 42

|         |                |
|---------|----------------|
| NAME    | XB20080222     |
| EXPNO   | 8              |
| PROCNO  | 1              |
| Date_   | 20080222       |
| Time    | 18.29          |
| INSTRUM | spect          |
| PROBHD  | 5 mm PATXO 19F |
| PULPROG | zgpg30         |
| TD      | 65536          |
| SOLVENT | CDC13          |
| NS      | 1024           |
| DS      | 4              |
| SWH     | 30030.029 Hz   |
| FIDRES  | 0.458222 Hz    |
| AQ      | 1.0912410 sec  |
| RG      | 143.7          |
| DW      | 16.650 usec    |
| DE      | 6.00 usec      |
| TE      | 296.4 K        |
| D1      | 2.00000000 sec |
| d11     | 0.03000000 sec |
| DELTA   | 1.89999998 sec |
| TD0     | 1              |

=====  
CHANNEL f1  
NUC1 13C  
P1 9.50 usec  
PL1 -0.50 dB  
SFO1 125.7703643 MHz

=====  
CHANNEL f2  
CPDPRG2 waltz16  
NUC2 1H  
PCPD2 80.00 usec  
PL2 2.00 dB  
PL12 16.50 dB  
PL13 16.50 dB  
SFO2 500.1320005 MHz  
SI 32768  
SF 125.7577890 MHz  
WDW no  
SSB 0  
LB 0.00 Hz  
GB 0  
PC 1.40

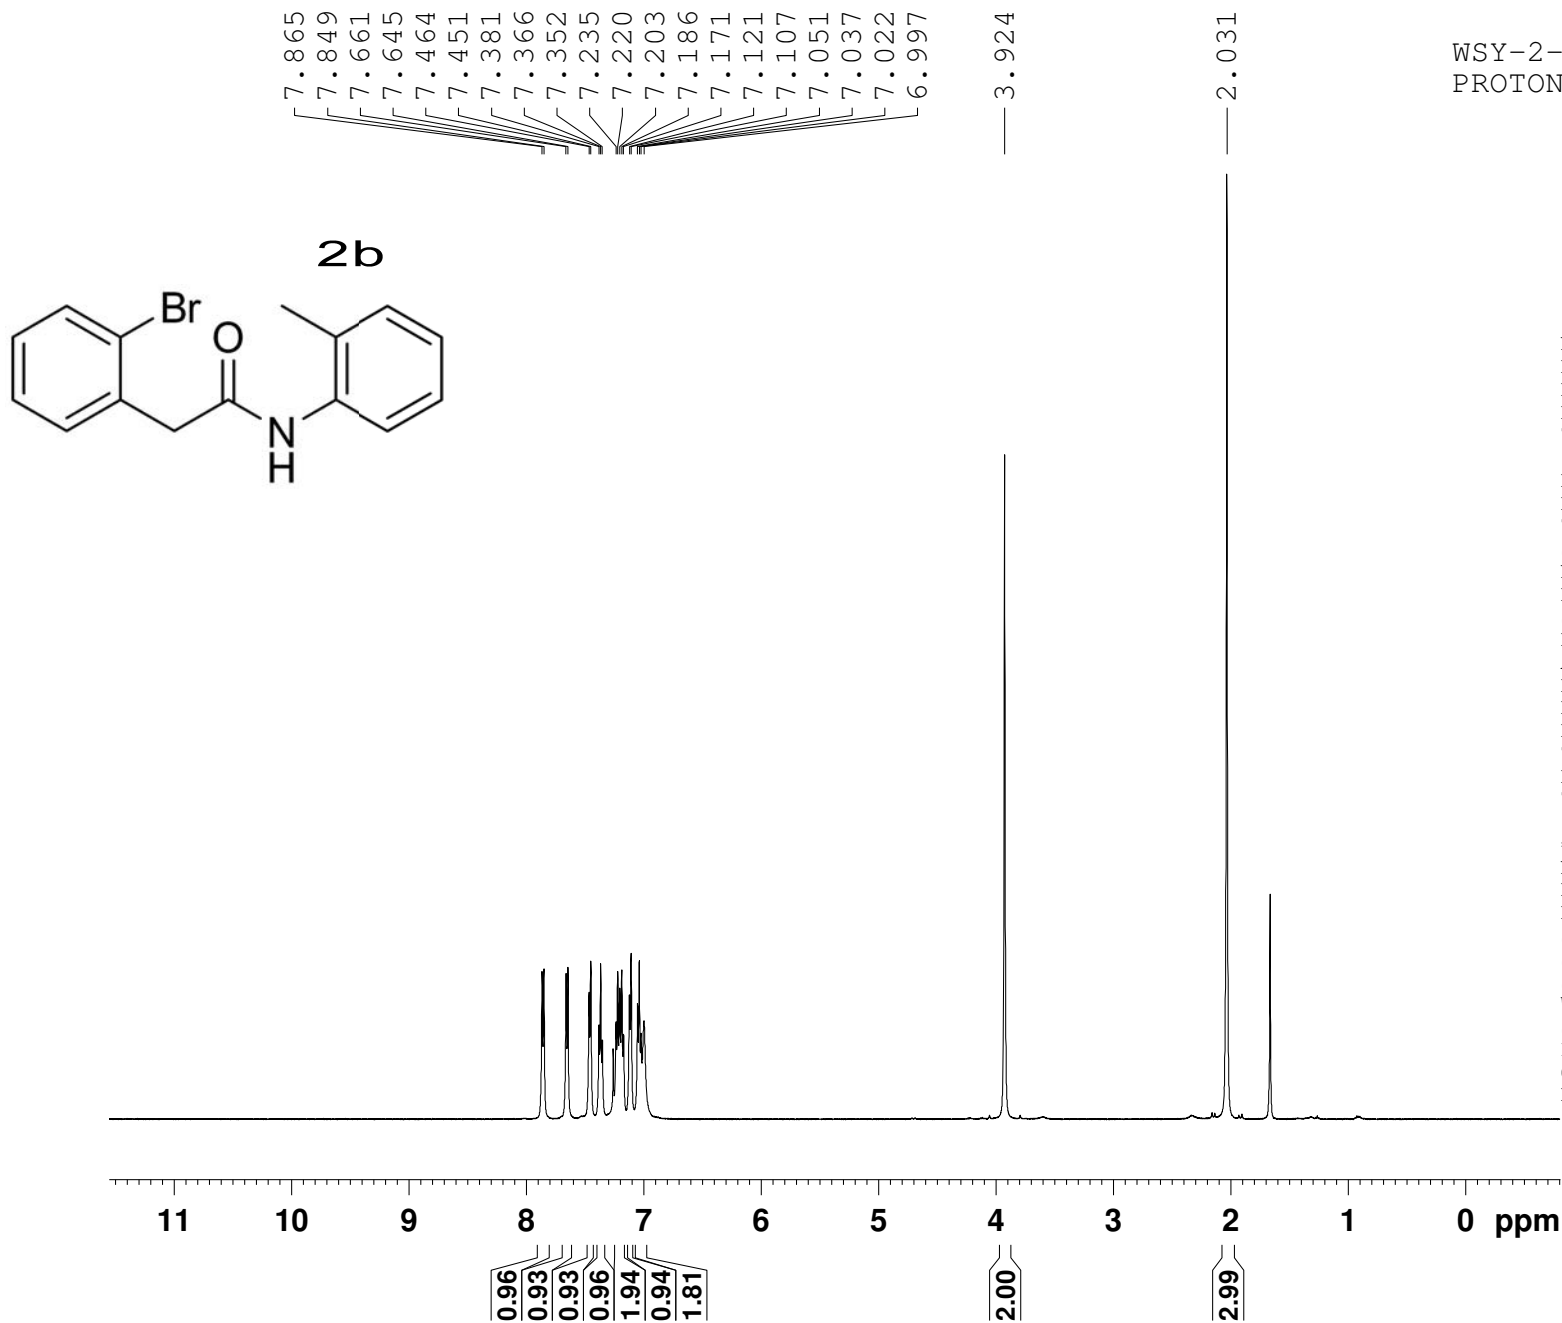

WSY-2-111B  
PROTON CDCl3 D:\\ deng 49

NAME XB20071114  
EXPNO 2  
PROCNO 1  
Date\_ 20071114  
Time 15.41  
INSTRUM spect  
PROBHD 5 mm PATXO 19F  
PULPROG zg30  
TD 65536  
SOLVENT CDCl3  
NS 16  
DS 2  
SWH 10330.578 Hz  
FIDRES 0.157632 Hz  
AQ 3.1720407 se  
RG 228.1  
DW 48.400 us  
DE 6.00 us  
TE 295.2 K  
D1 1.00000000 se  
TD0 1

==== CHANNEL f1 =====  
NUC1 1H  
P1 14.50 us  
PL1 2.00 dB  
SFO1 500.1330885 MH  
SI 32768  
SF 500.1300137 MH  
WDW no  
SSB 0  
LB 0.00 Hz  
GB 0  
PC 1.00

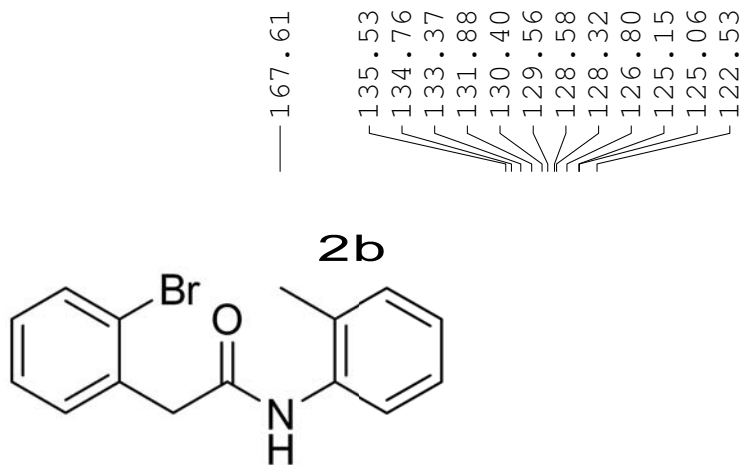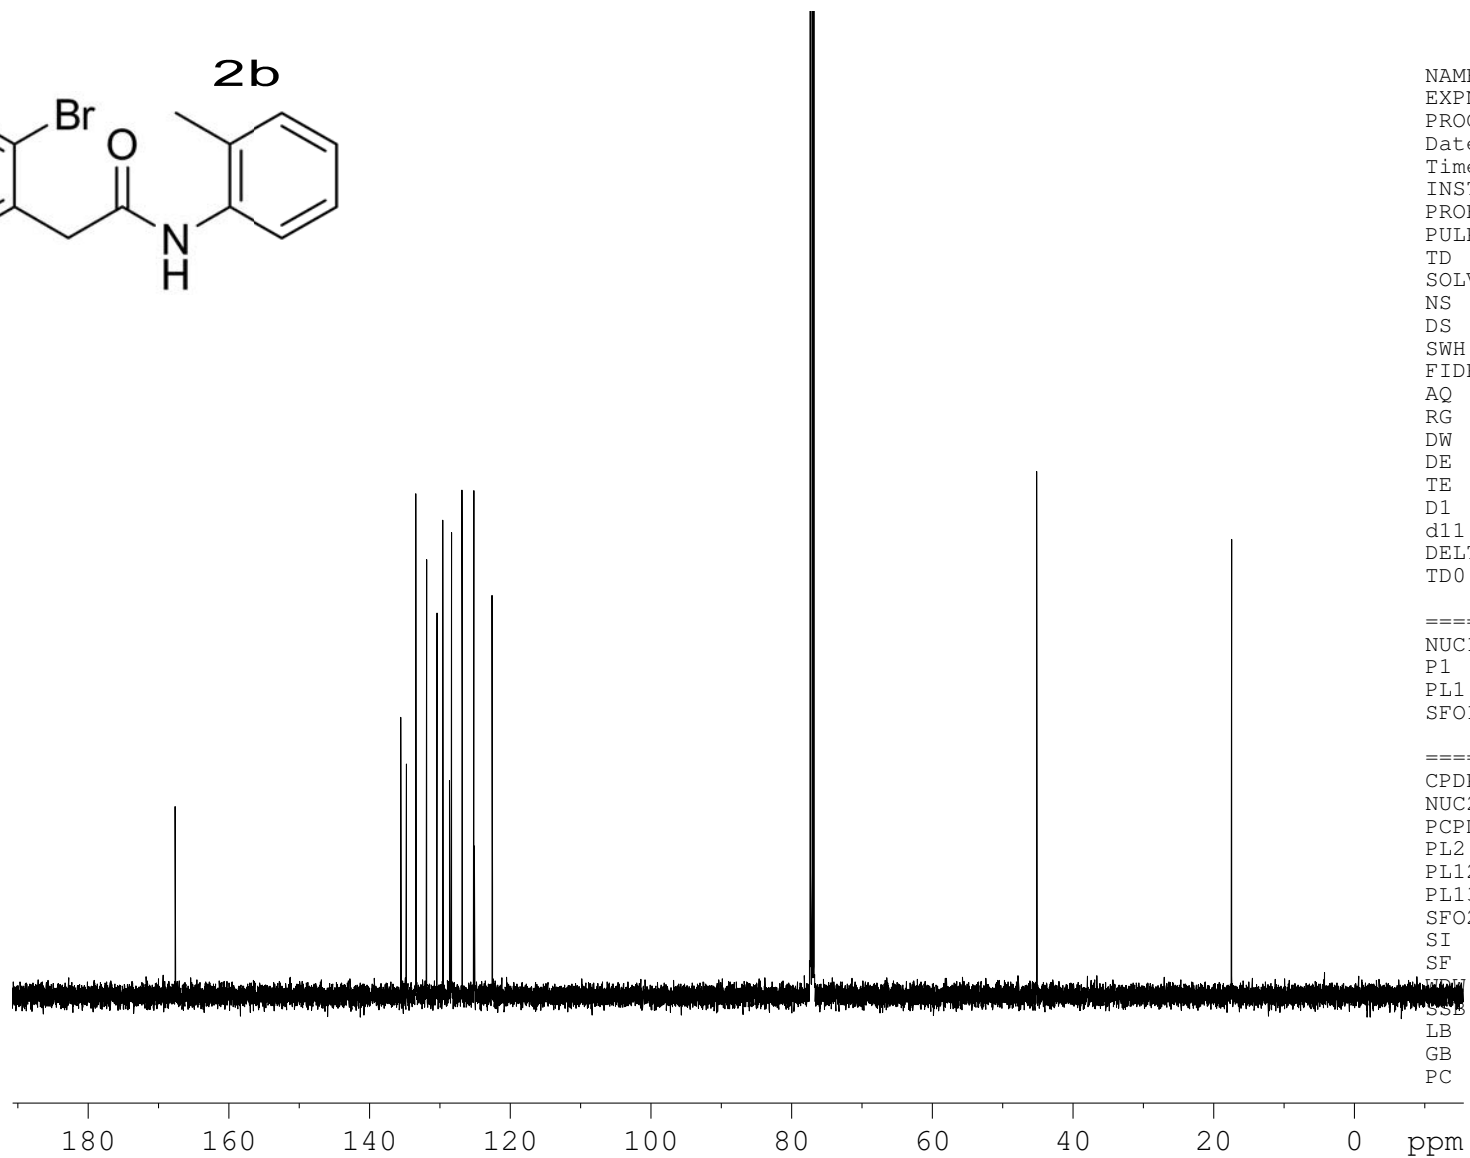

WSY-2-111B  
C13CPD CDC13 D:\\ deng 50

NAME XB20071114  
EXPNO 3  
PROCNO 1  
Date\_ 20071114  
Time 18.08  
INSTRUM spect  
PROBHD 5 mm PATXO 19F  
PULPROG zgpg30  
TD 65536  
SOLVENT CDC13  
NS 2200  
DS 4  
SWH 35211.270 Hz  
FIDRES 0.537281 Hz  
AQ 0.9306754 sec  
RG 512  
DW 14.200 usec  
DE 6.00 usec  
TE 296.3 K  
D1 2.00000000 sec  
d11 0.03000000 sec  
DELTA 1.89999998 sec  
TD0 1

=====  
CHANNEL f1  
NUC1 13C  
P1 9.50 usec  
PL1 -0.50 dB  
SFO1 125.7716224 MHz

=====  
CHANNEL f2  
CPDPRG2 waltz16  
NUC2 1H  
PCPD2 80.00 usec  
PL2 2.00 dB  
PL12 16.50 dB  
PL13 16.50 dB  
SFO2 500.1320005 MHz  
SI 32768  
SF 125.7577890 MHz  
SSB no  
LB 0  
GB 0  
PC 1.40

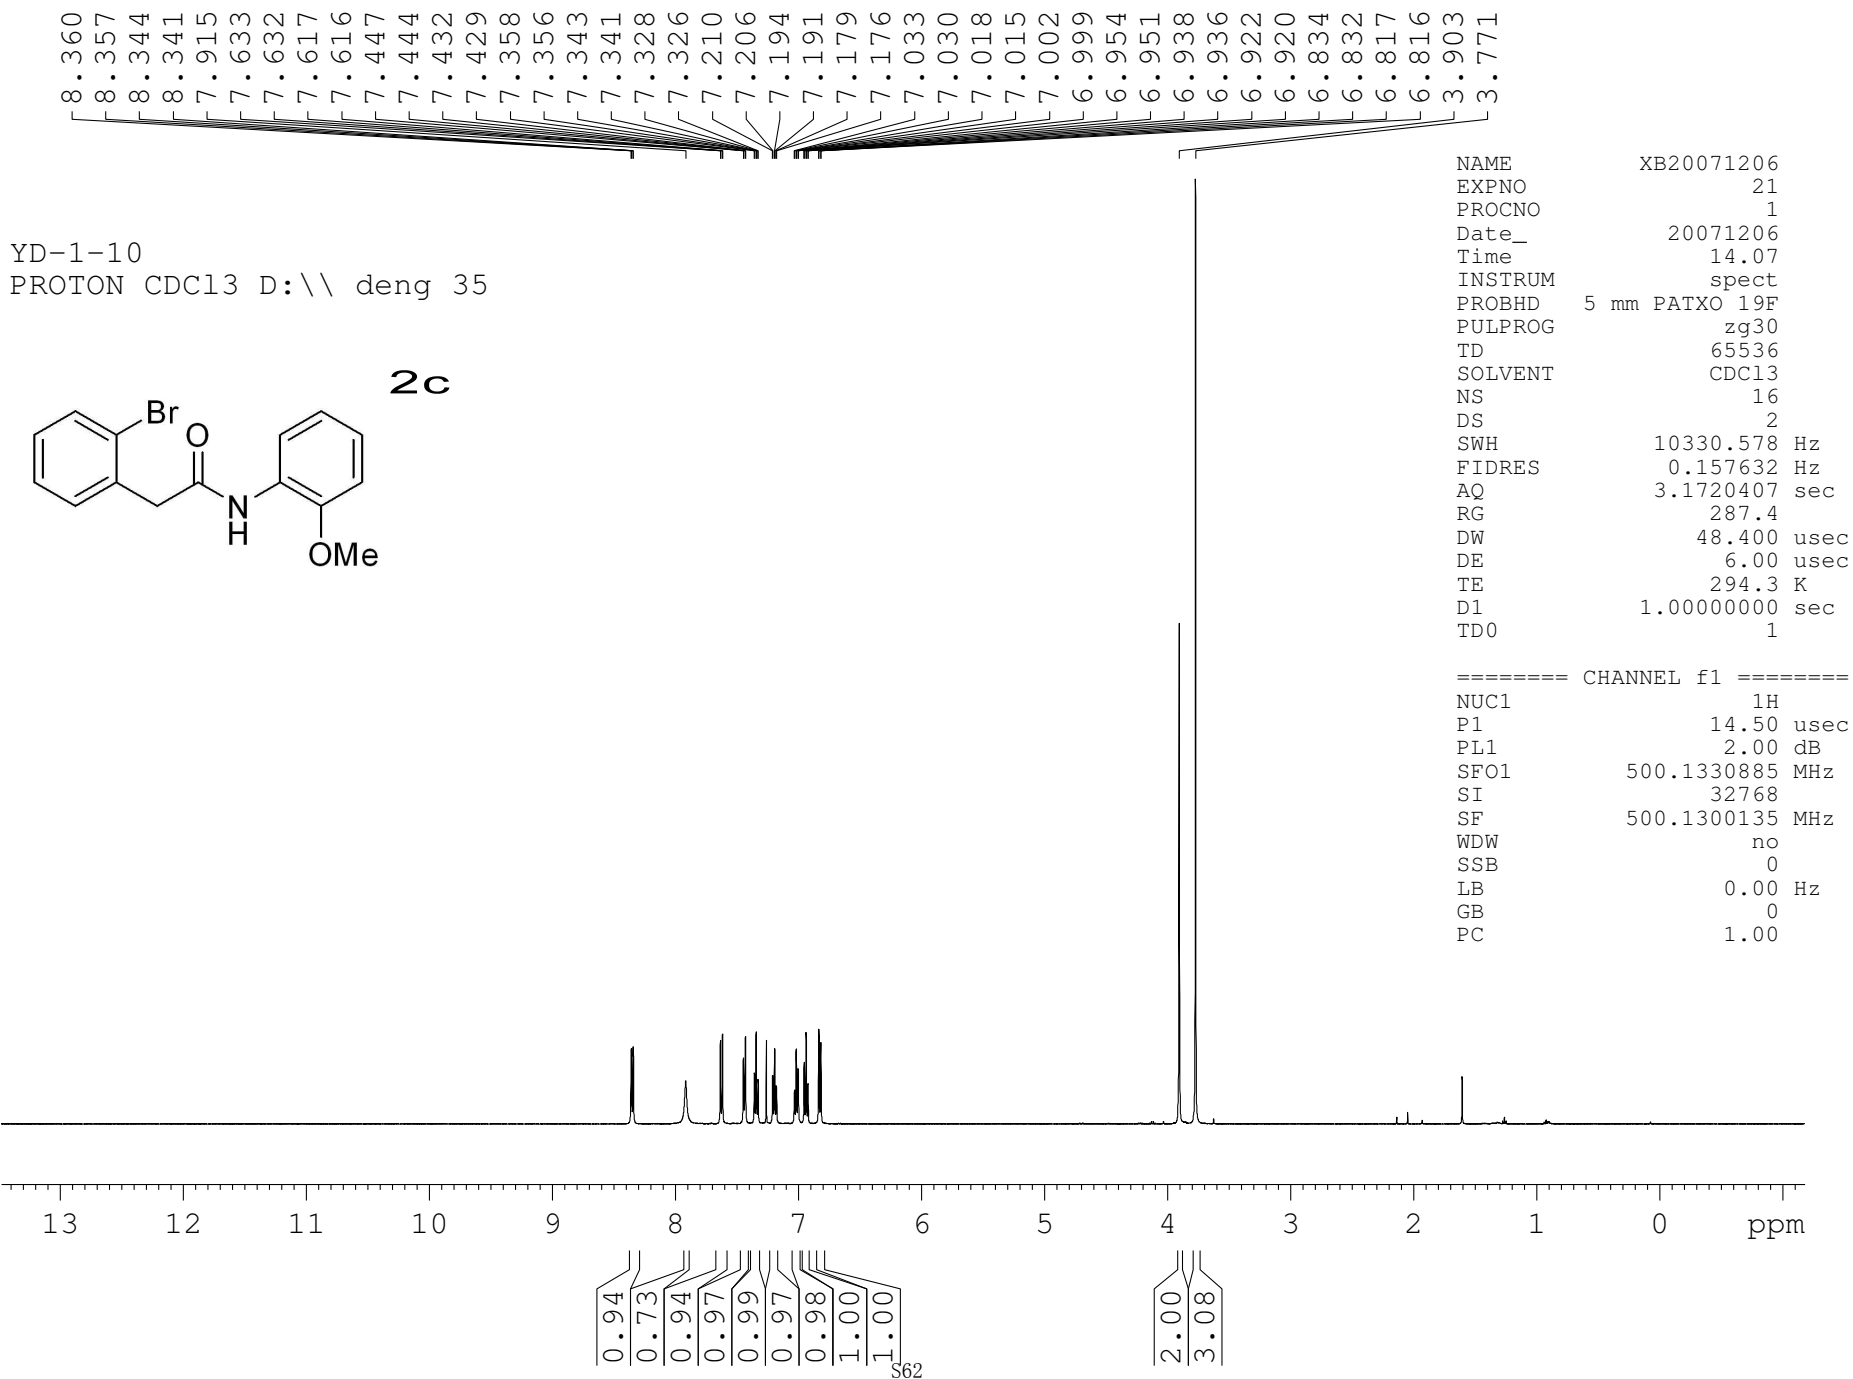

YD-1-10  
C13CPD CDC13 D:\ deng 41

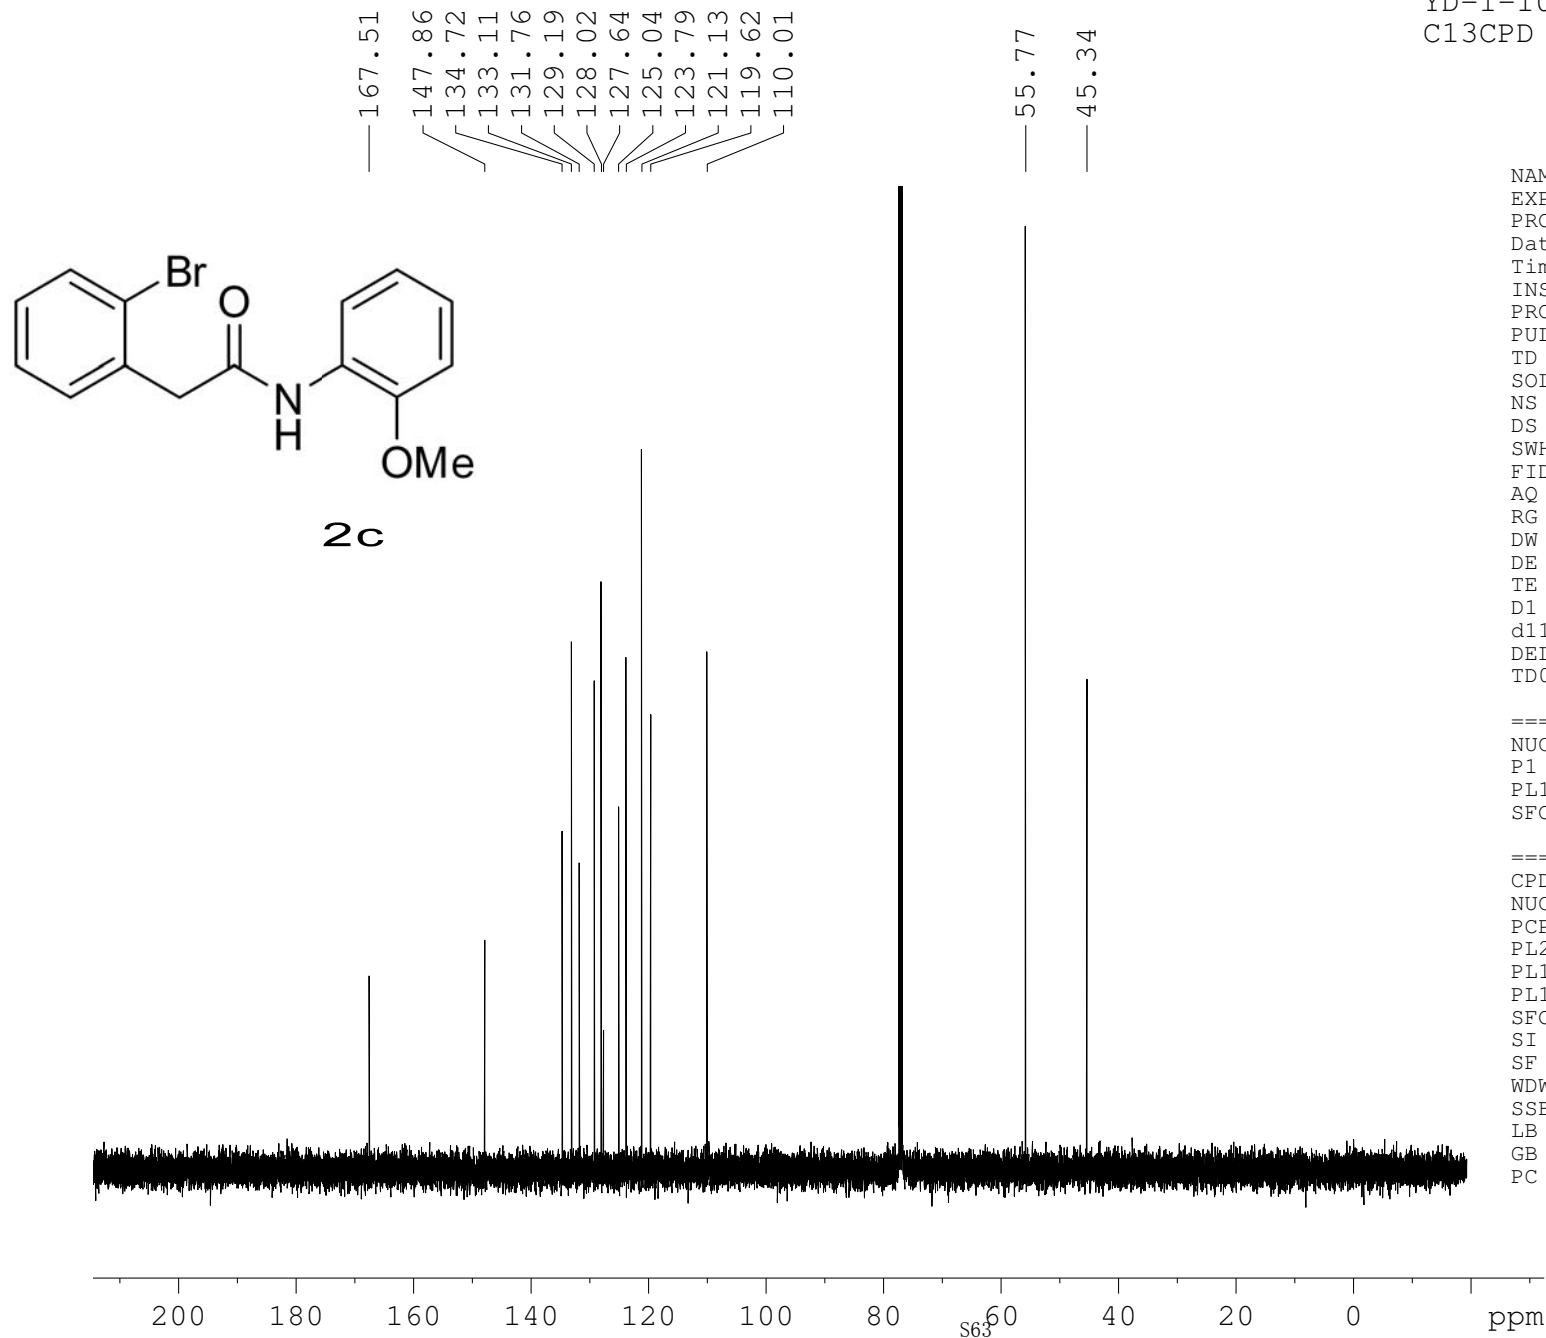

```
NAME          XB20071206
EXPNO         23
PROCNO        1
Date_         20071206
Time          16.15
INSTRUM       spect
PROBHD        5 mm PATXO 19F
PULPROG       zgpg30
TD            65536
SOLVENT       CDC13
NS            1024
DS            4
SWH           30030.029 Hz
FIDRES        0.458222 Hz
AQ            1.0912410 sec
RG            512
DW            16.650 usec
DE            6.00 usec
TE            295.4 K
D1            2.0000000 sec
d11           0.03000000 sec
DELTA         1.89999998 sec
TD0           1

===== CHANNEL f1 =====
NUC1          13C
P1            9.50 usec
PL1           -0.50 dB
SFO1          125.7703643 MHz

===== CHANNEL f2 =====
CPDPRG2       waltz16
NUC2          1H
PCPD2         80.00 usec
PL2           2.00 dB
PL12          16.50 dB
PL13          16.50 dB
SFO2          500.1320005 MHz
SI            32768
SF            125.7577890 MHz
WDW           no
SSB           0
LB            0.00 Hz
GB            0
PC            1.40
```

wsy-2-112  
PROTON CDC13

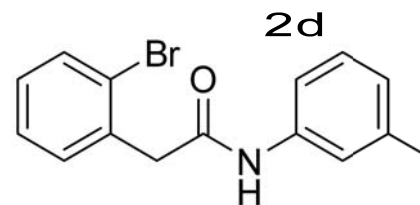

NAME XB20071121  
EXPNO 11  
PROCNO 1  
Date\_ 20071121  
Time 15.35  
INSTRUM spect  
PROBHD 5 mm PATXO 19F  
PULPROG zg30  
TD 65536  
SOLVENT CDC13  
NS 16  
DS 2  
SWH 10330.578 Hz  
FIDRES 0.157632 Hz  
AQ 3.1720407 sec  
RG 406.4  
DW 48.400 usec  
DE 6.00 usec  
TE 294.1 K  
D1 1.00000000 sec  
TD0 1

===== CHANNEL f1 =====  
NUC1 1H  
P1 14.50 usec  
PL1 2.00 dB  
SFO1 500.1330885 MHz  
SI 32768  
SF 500.1300129 MHz  
WDW no  
SSB 0  
LB 0.00 Hz  
GB 0  
PC 1.00

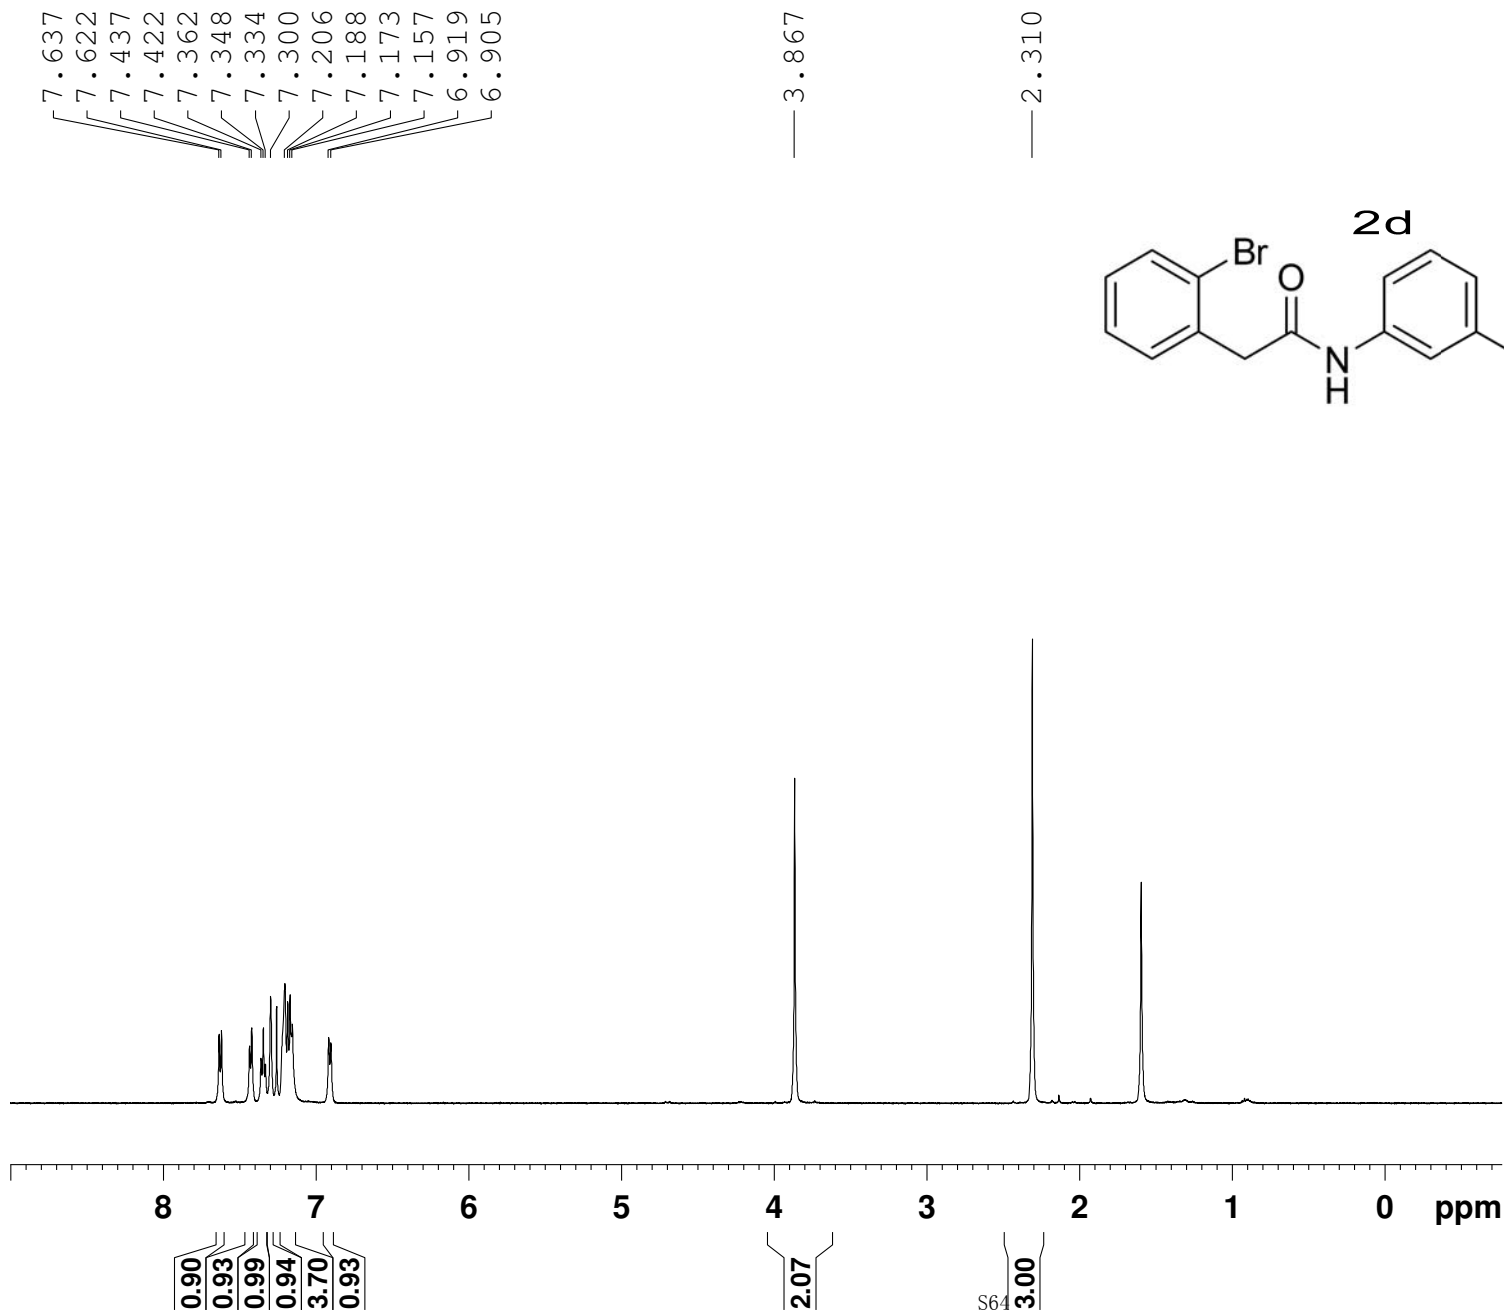



WSY-2-112  
C13CPD CDC13

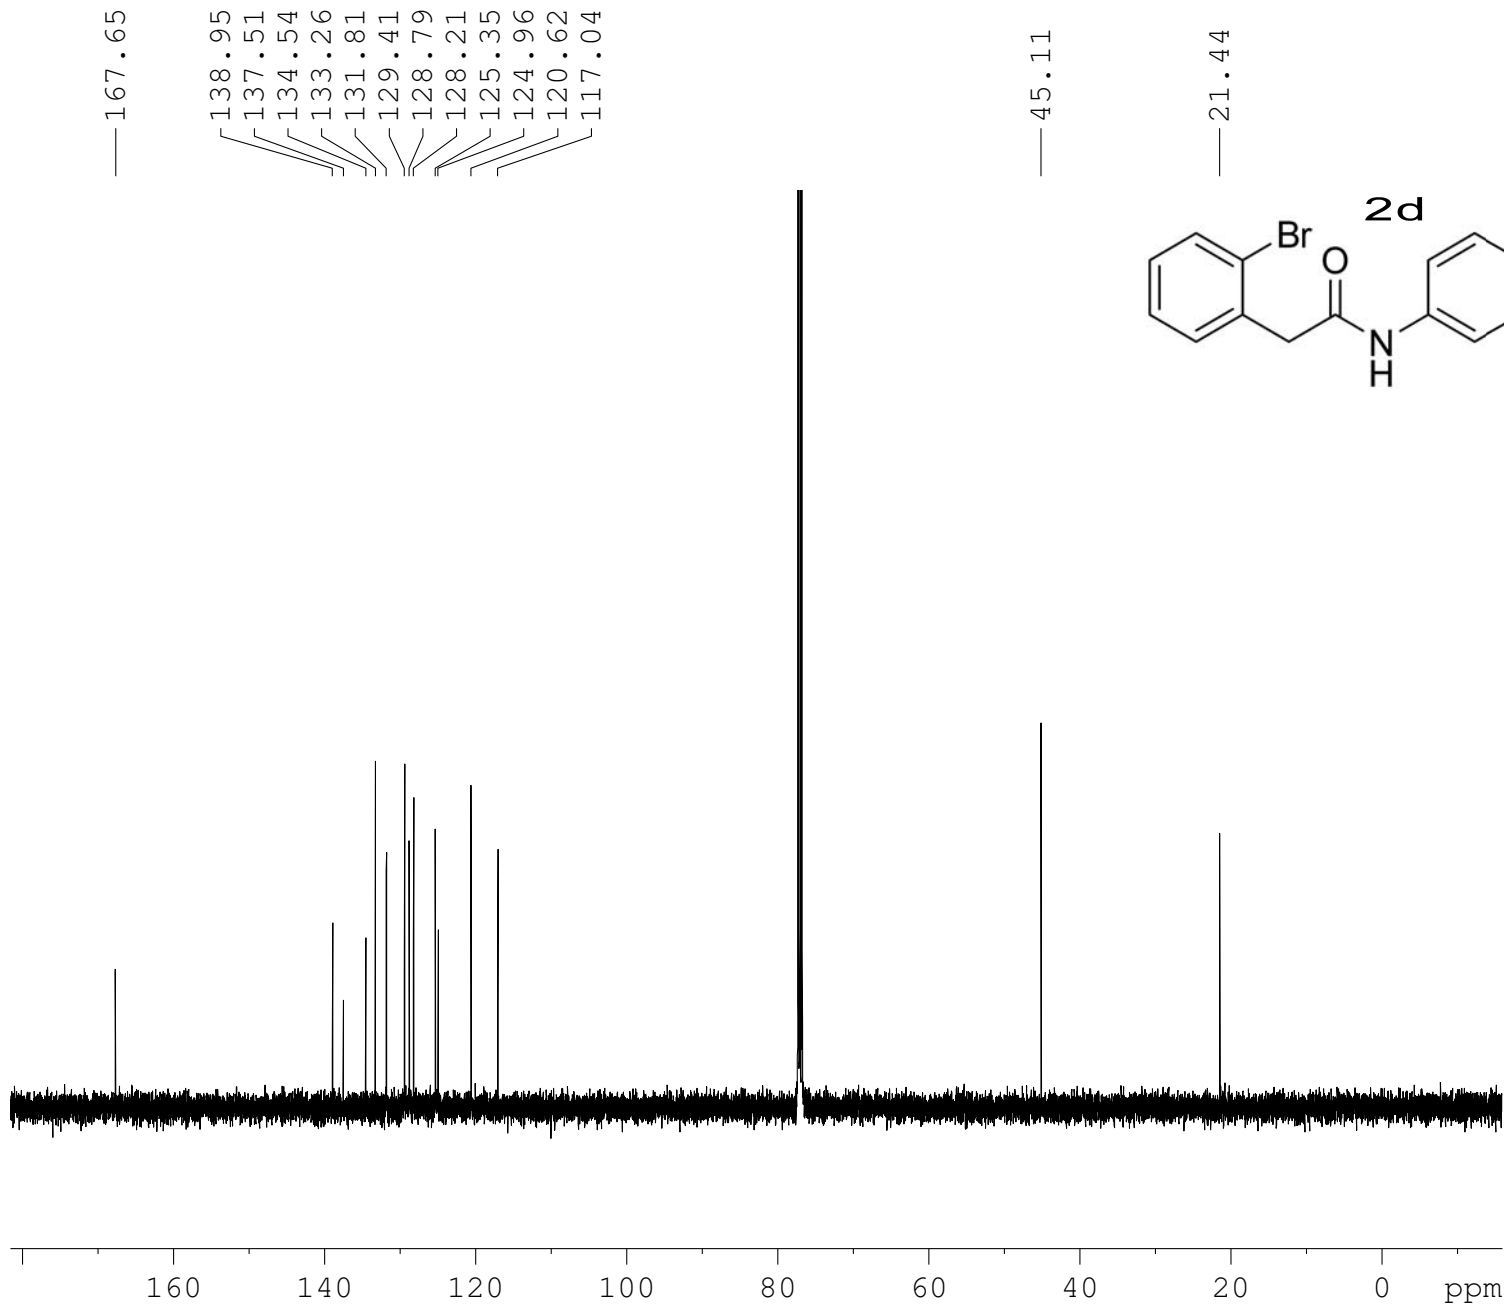

|         |                |
|---------|----------------|
| NAME    | XB20071121     |
| EXPNO   | 15             |
| PROCNO  | 1              |
| Date_   | 20071122       |
| Time    | 20.05          |
| INSTRUM | spect          |
| PROBHD  | 5 mm PATXO 19F |
| PULPROG | zgpg30         |
| TD      | 65536          |
| SOLVENT | CDC13          |
| NS      | 6051           |
| DS      | 4              |
| SWH     | 35211.270 Hz   |
| FIDRES  | 0.537281 Hz    |
| AQ      | 0.9306754 sec  |
| RG      | 456.1          |
| DW      | 14.200 usec    |
| DE      | 6.00 usec      |
| TE      | 295.9 K        |
| D1      | 2.00000000 sec |
| d11     | 0.03000000 sec |
| DELTA   | 1.89999998 sec |
| TD0     | 1              |

==== CHANNEL f1 =====  
NUC1 13C  
P1 9.50 usec  
PL1 -0.50 dB  
SFO1 125.7716224 MHz

==== CHANNEL f2 =====  
CPDPRG2 waltz16  
NUC2 1H  
PCPD2 80.00 usec  
PL2 2.00 dB  
PL12 16.50 dB  
PL13 16.50 dB  
SFO2 500.1320005 MHz  
SI 32768  
SF 125.7577890 MHz  
WDW no  
SSB 0  
LB 0.00 Hz  
GB 0  
PC 1.40

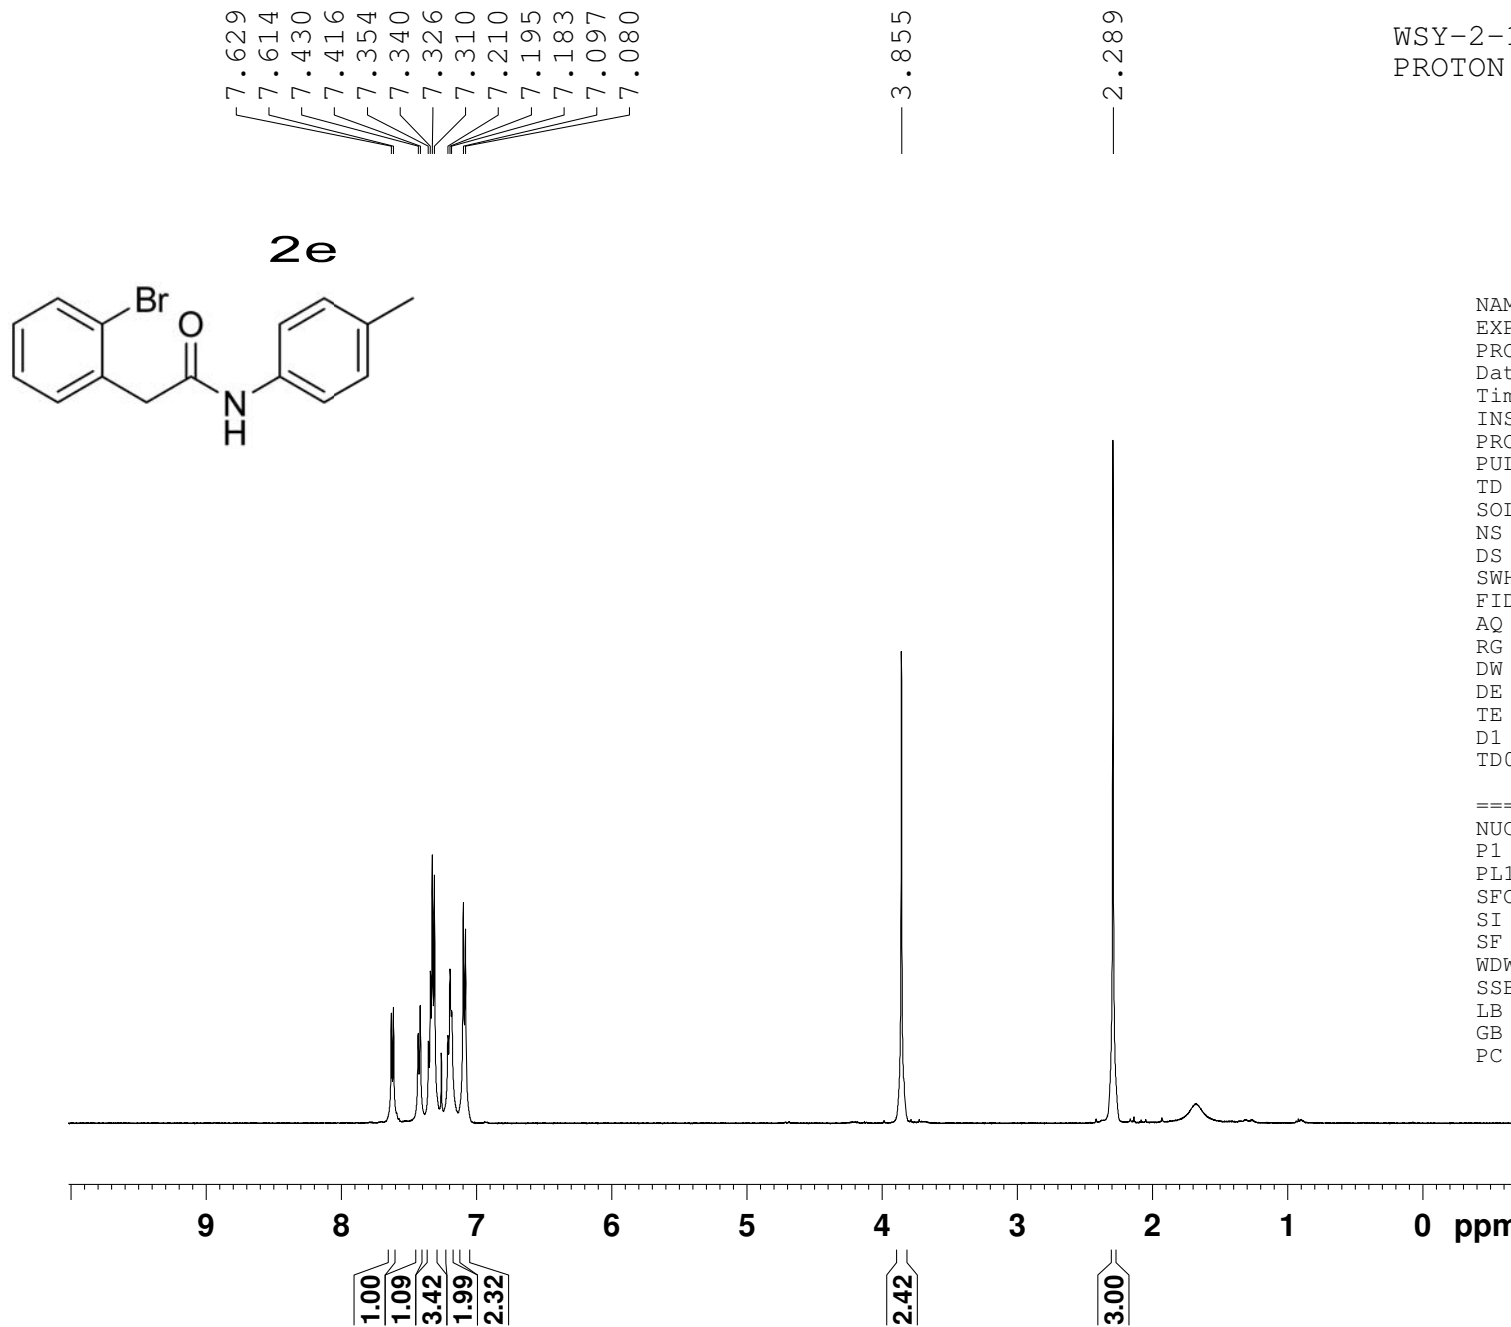

WSY-2-135  
PROTON CDC13 D:\ deng 22

```
NAME          XB20071126
EXPNO          12
PROCNO         1
Date_         20071126
Time           17.05
INSTRUM        spect
PROBHD         5 mm PATXO 19F
PULPROG        zg30
TD             65536
SOLVENT        CDC13
NS             16
DS             2
SWH            10330.578 Hz
FIDRES         0.157632 Hz
AQ             3.1720407 sec
RG             256
DW             48.400 usec
DE             6.00 usec
TE             293.2 K
D1             1.00000000 sec
TD0            1

===== CHANNEL f1 =====
NUC1           1H
P1             14.50 usec
PL1            2.00 dB
SFO1           500.1330885 MHz
SI             32768
SF             500.1300135 MHz
WDW            no
SSB            0
LB             0.00 Hz
GB             0
PC             1.00
```

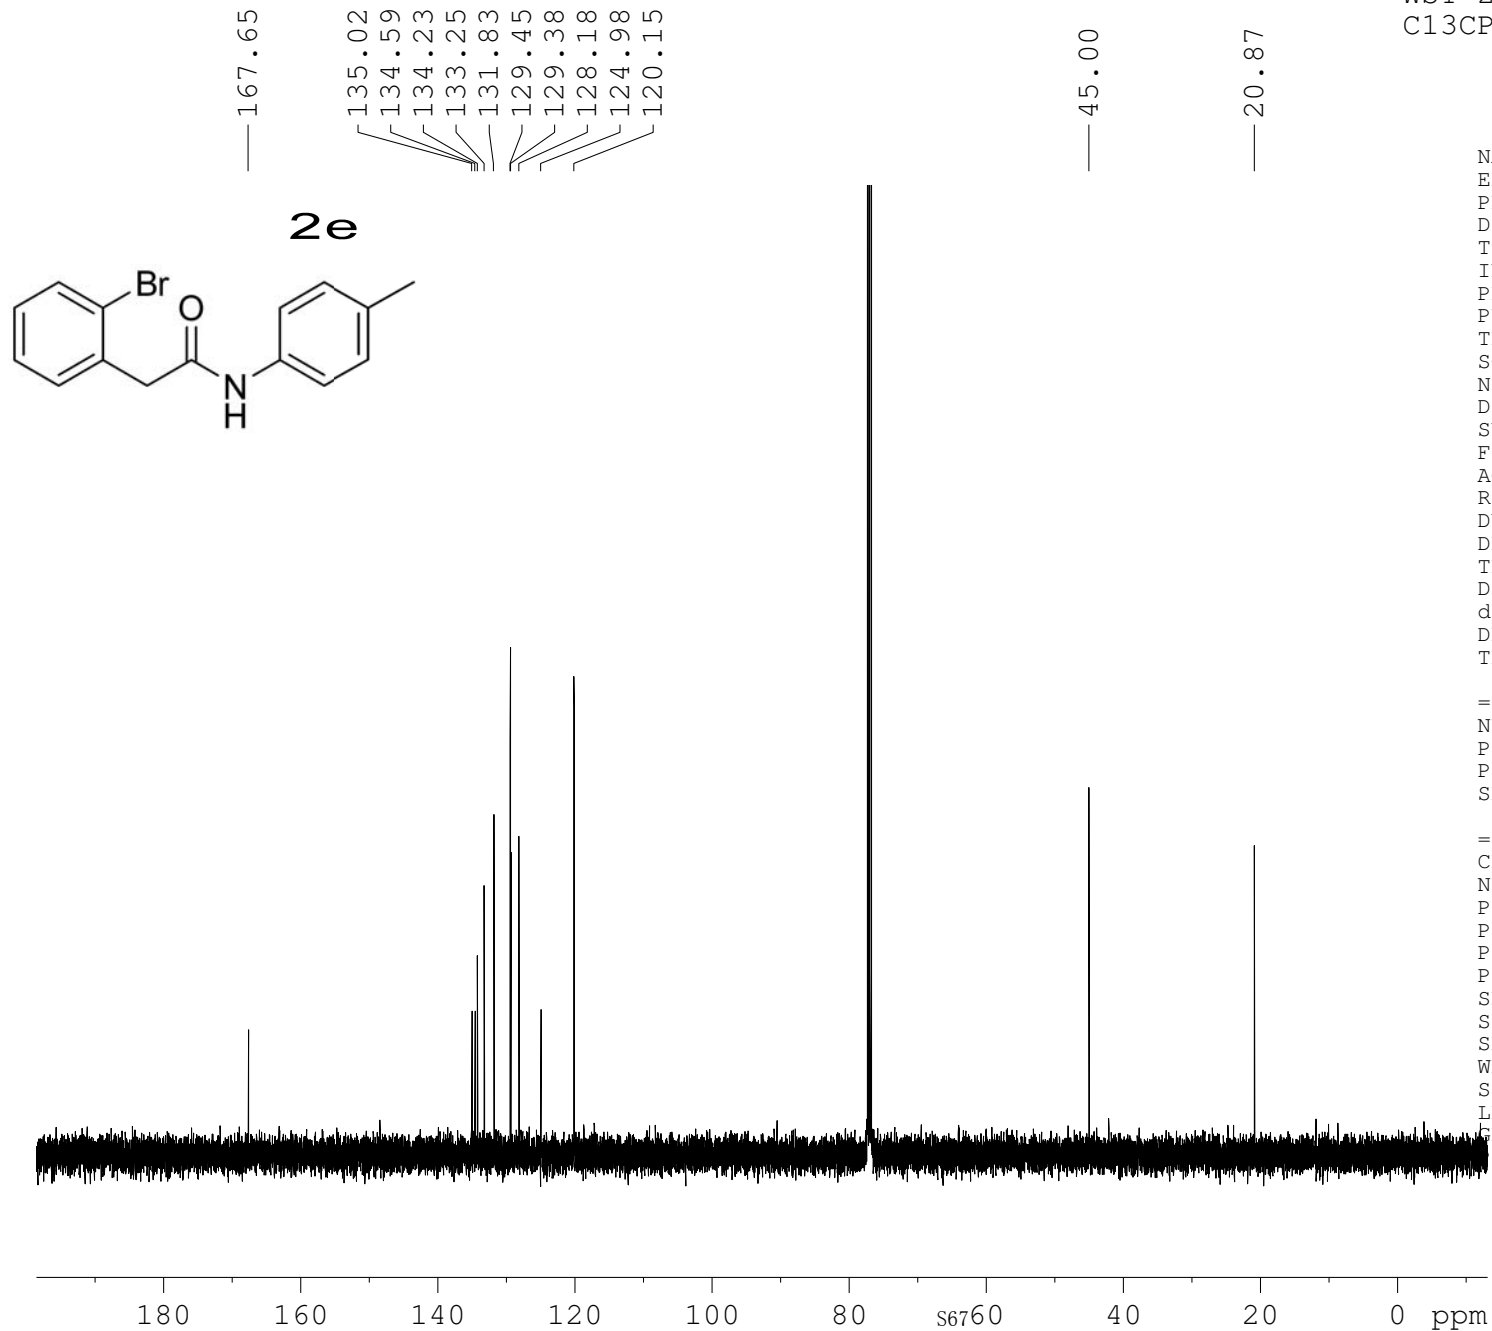

WSY-2-135  
C13CPD CDC13 D:\\ deng 27

NAME XB20071127  
EXPNO 21  
PROCNO 1  
Date\_ 20071127  
Time 15.30  
INSTRUM spect  
PROBHD 5 mm PATXO 19F  
PULPROG zgpg30  
TD 65536  
SOLVENT CDC13  
NS 1024  
DS 4  
SWH 30030.029 Hz  
FIDRES 0.458222 Hz  
AQ 1.0912410 sec  
RG 181  
DW 16.650 usec  
DE 6.00 usec  
TE 295.5 K  
D1 2.00000000 sec  
d11 0.03000000 sec  
DELTA 1.89999998 sec  
TD0 1

===== CHANNEL f1 =====  
NUC1 13C  
P1 9.50 usec  
PL1 -0.50 dB  
SFO1 125.7703643 MHz

===== CHANNEL f2 =====  
CPDPRG2 waltz16  
NUC2 1H  
PCPD2 80.00 usec  
PL2 2.00 dB  
PL12 16.50 dB  
PL13 16.50 dB  
SFO2 500.1320005 MHz  
SI 32768  
SF 125.7577890 MHz  
WDW no  
SSB 0  
LB 0.00 Hz  
GB 0  
C 1.40

WSY-2-63  
PROTON CDC13 D:\\ deng 24

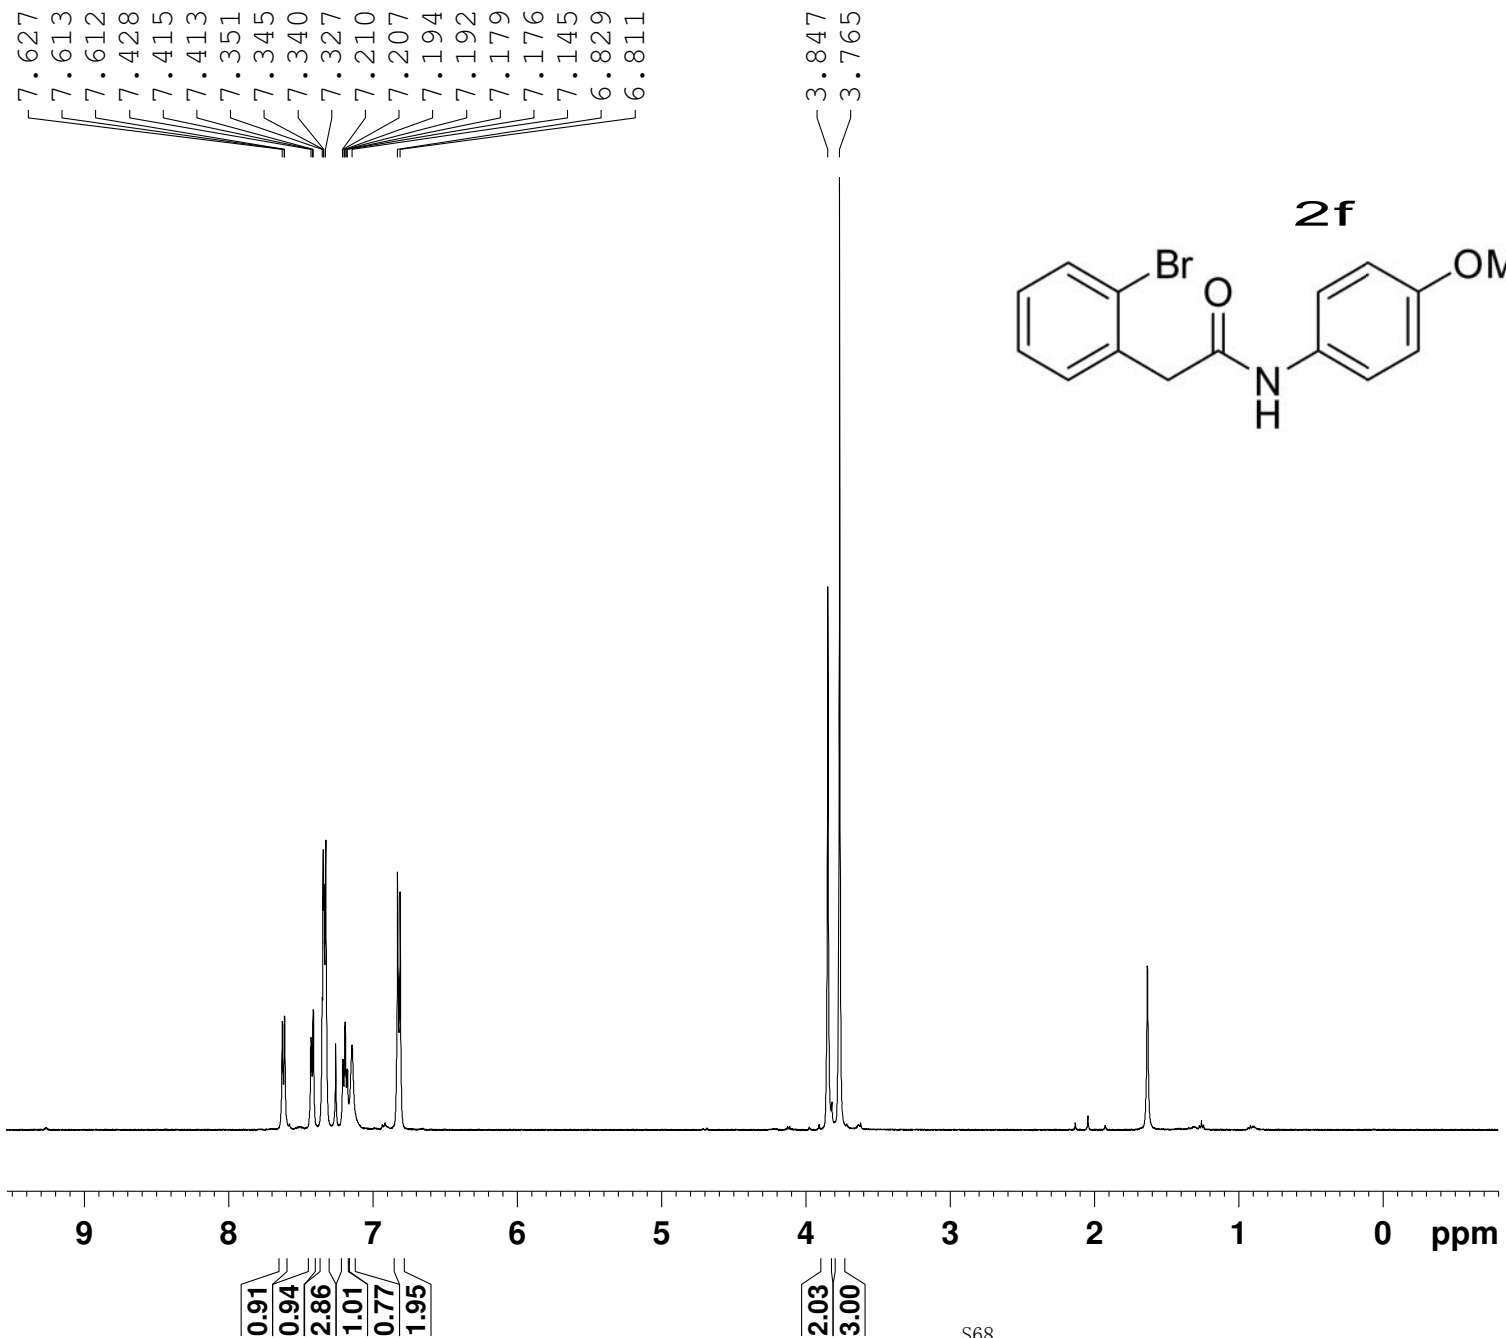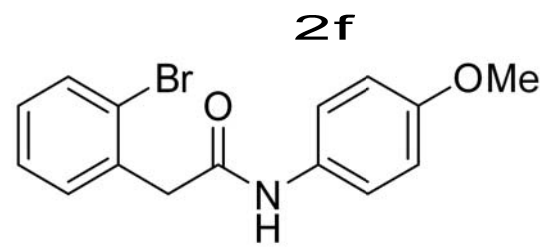

```
NAME          XB20071112
EXPNO         22
PROCNO        1
Date_         20071112
Time          15.49
INSTRUM       spect
PROBHD        5 mm PATXO 19F
PULPROG       zg30
TD            65536
SOLVENT       CDC13
NS            16
DS            2
SWH           10330.578 Hz
FIDRES        0.157632 Hz
AQ            3.1720407 sec
RG            256
DW            48.400 usec
DE            6.00 usec
TE            294.9 K
D1            1.0000000 sec
TD0           1

===== CHANNEL f1 =====
NUC1           1H
P1             14.50 usec
PL1            2.00 dB
SFO1          500.1330885 MHz
SI            32768
SF            500.1300139 MHz
WDW            no
SSB            0
LB             0.00 Hz
GB             0
PC             1.00
```

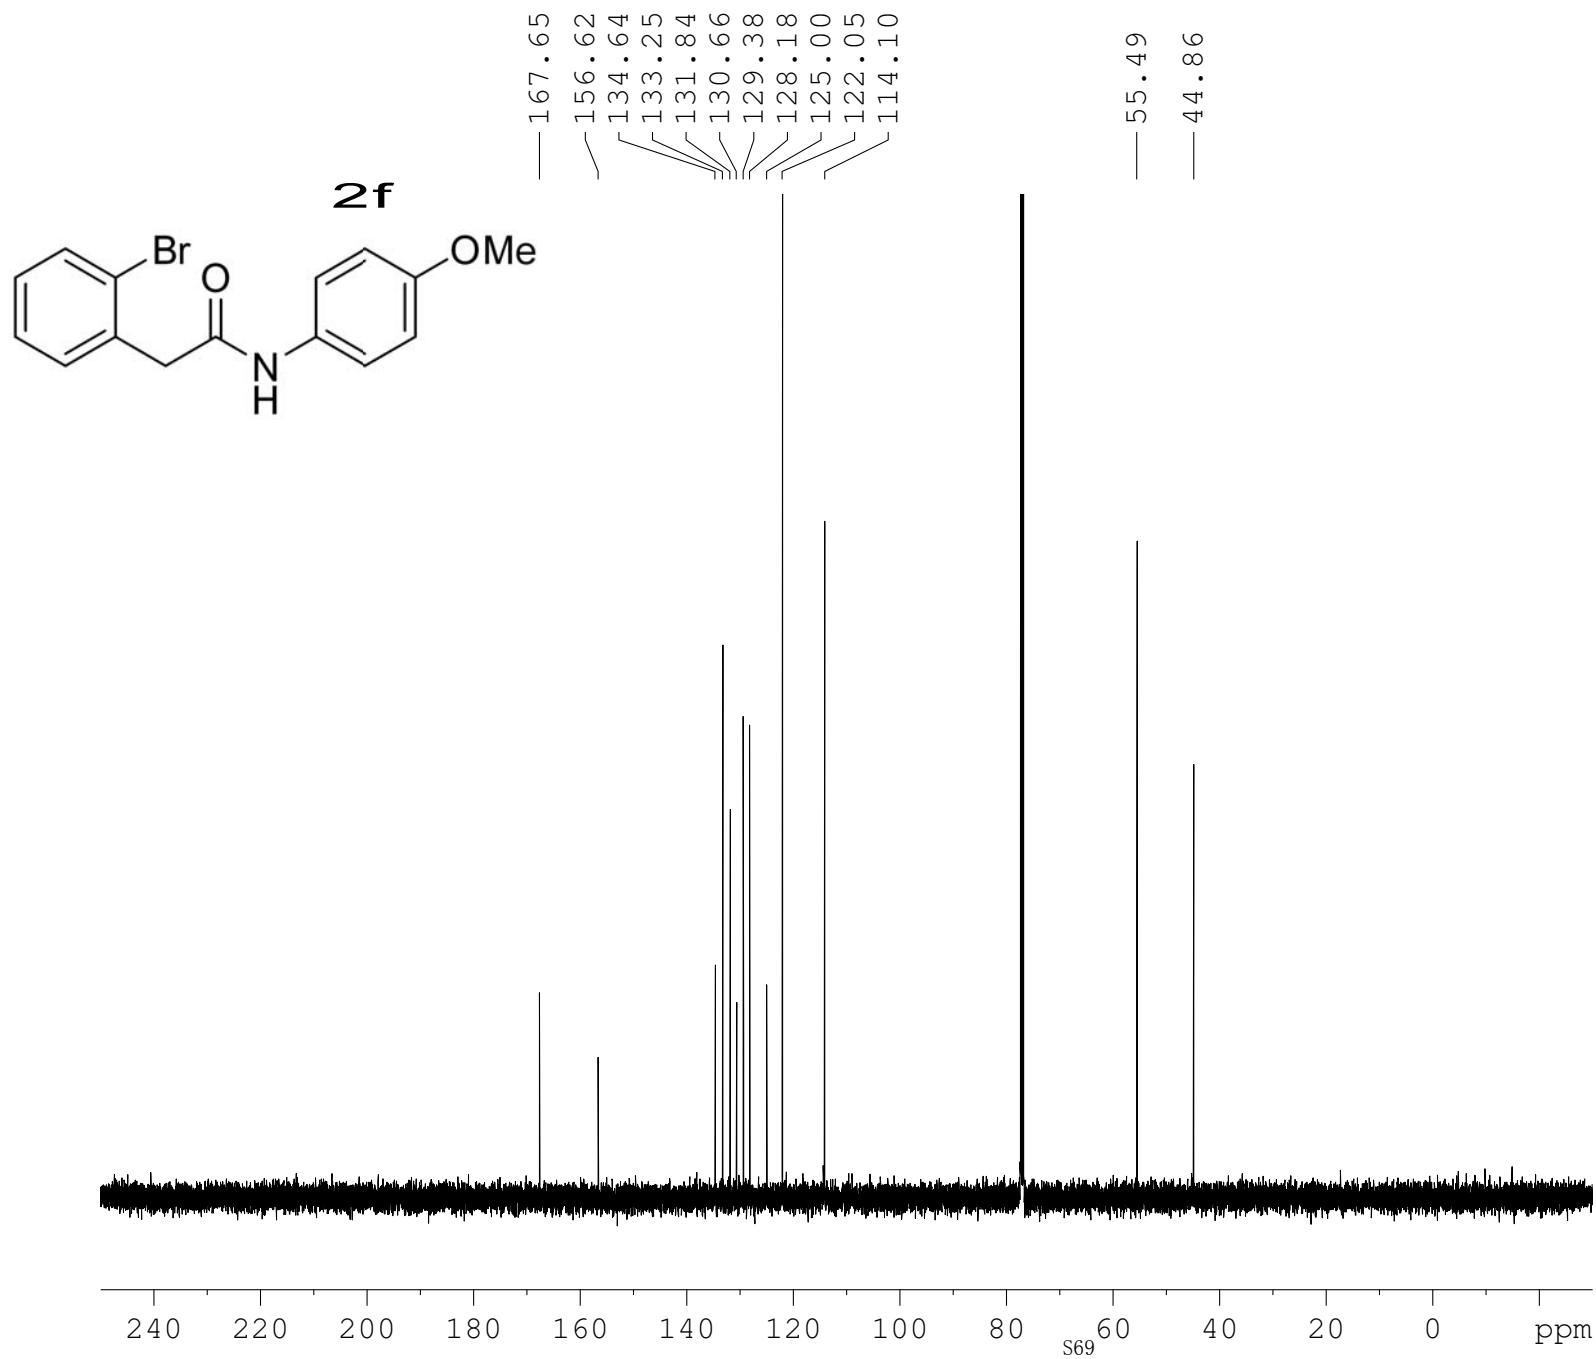

WSY-2-63  
C13CPD CDC13 D:\\ deng 2'

NAME XB20071112  
EXPNO 25  
PROCNO 1  
Date\_ 20071113  
Time 5.58  
INSTRUM spect  
PROBHD 5 mm PATXO 19F  
PULPROG zgpg30  
TD 65536  
SOLVENT CDC13  
NS 2200  
DS 4  
SWH 35211.270 Hz  
FIDRES 0.537281 Hz  
AQ 0.9306754 sec  
RG 456.1  
DW 14.200 usec  
DE 6.00 usec  
TE 294.8 K  
D1 2.00000000 sec  
TD0 1

===== CHANNEL f1 =====  
NUC1 13C  
P1 9.50 usec  
PL1 -0.50 dB  
SFO1 125.7716224 MHz  
SI 32768  
SF 125.7577890 MHz  
WDW no  
SSB 0  
LB 0.00 Hz  
GB 0  
PC 1.40

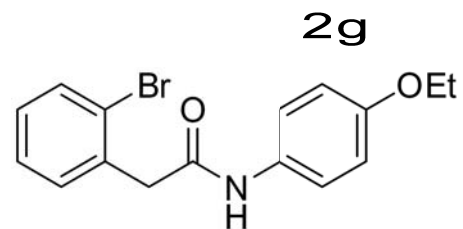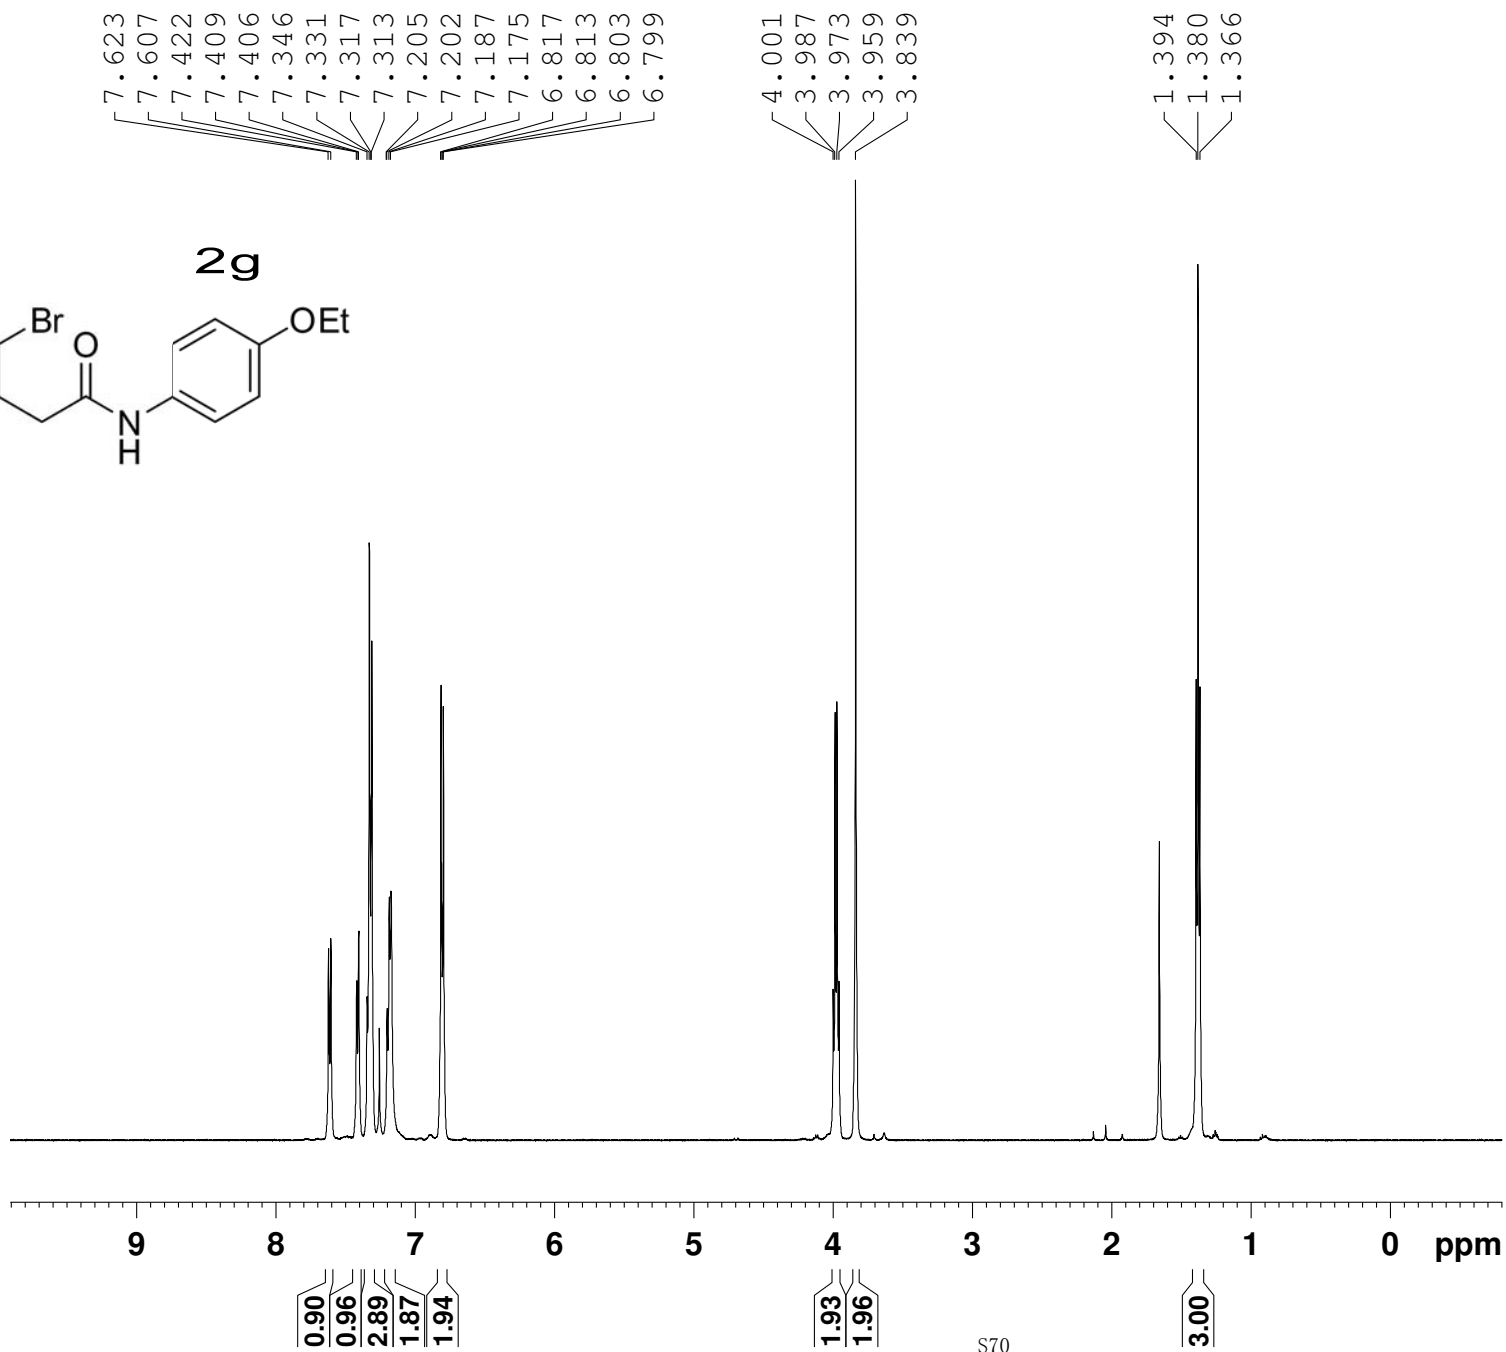

WSY-2-128  
PROTON CDCl3 D:\ deng 60

NAME XB20071121  
EXPNO 12  
PROCNO 1  
Date\_ 20071121  
Time 15.53  
INSTRUM spect  
PROBHD 5 mm PATXO 19F  
PULPROG zg30  
TD 65536  
SOLVENT CDCl3  
NS 16  
DS 2  
SWH 10330.578 Hz  
FIDRES 0.157632 Hz  
AQ 3.1720407 sec  
RG 228.1  
DW 48.400 usec  
DE 6.00 usec  
TE 294.1 K  
D1 1.00000000 sec  
TD0 1

===== CHANNEL f1 =====  
NUC1 1H  
P1 14.50 usec  
PL1 2.00 dB  
SFO1 500.1330885 MHz  
SI 32768  
SF 500.1300136 MHz  
WDW no  
SSB 0  
LB 0.00 Hz  
GB 0  
PC 1.00

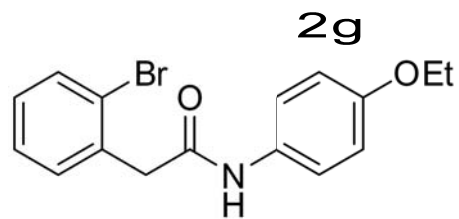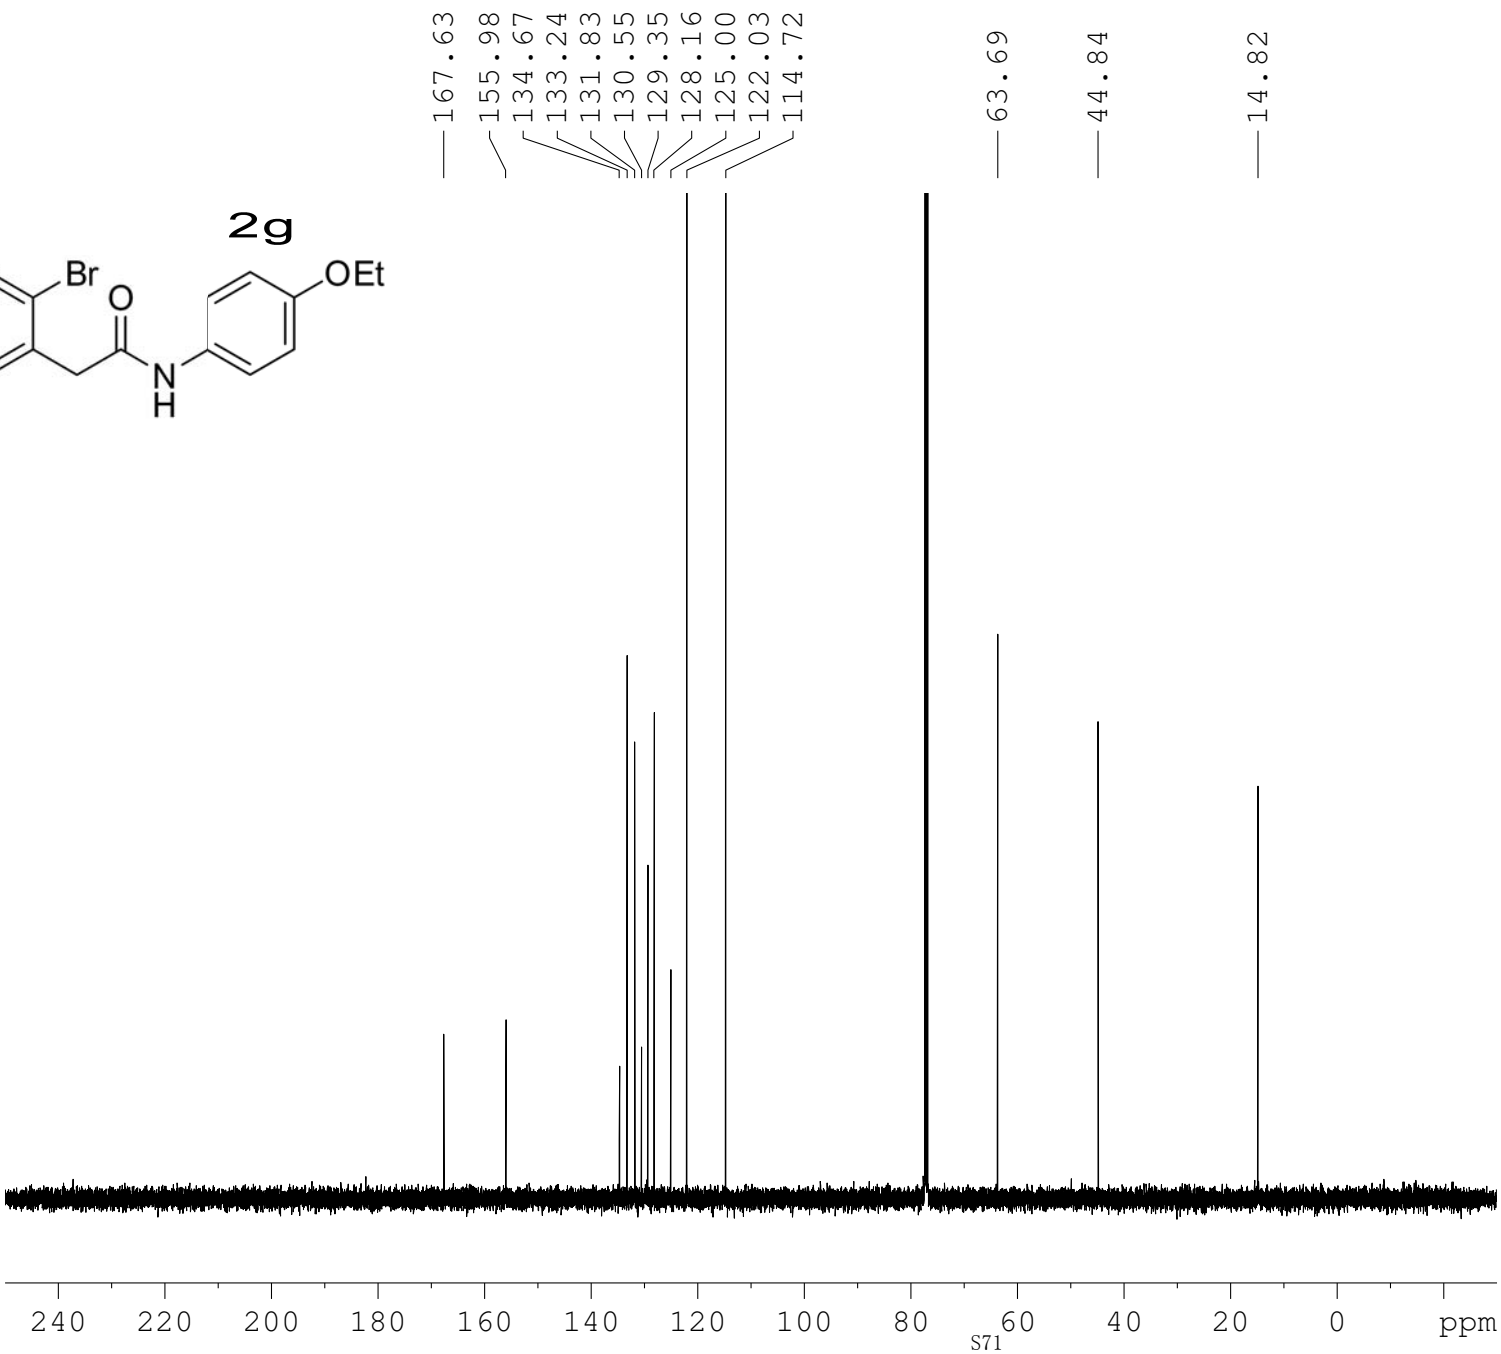

WSY-2-128  
C13CPD CDC13 D:\\ deng 4

NAME XB20071121  
EXPNO 14  
PROCNO 1  
Date\_ 20071121  
Time 18.26  
INSTRUM spect  
PROBHD 5 mm PATXO 19F  
PULPROG zgpg30  
TD 65536  
SOLVENT CDC13  
NS 2400  
DS 4  
SWH 35211.270 Hz  
FIDRES 0.537281 Hz  
AQ 0.9306754 sec  
RG 456.1  
DW 14.200 usec  
DE 6.00 usec  
TE 296.1 K  
D1 2.00000000 sec  
TD0 1

===== CHANNEL f1 =====  
NUC1 13C  
P1 9.50 usec  
PL1 -0.50 dB  
SFO1 125.7716224 MHz  
SI 32768  
SF 125.7577890 MHz  
WDW no  
SSB 0  
LB 0.00 Hz  
GB 0  
PC 1.40

7.662  
7.646  
7.447  
7.431  
7.413  
7.390  
7.380  
7.362  
7.265  
7.254  
7.251  
7.238  
7.236  
7.223  
7.220

— 3.887

WSY-2-124  
PROTON CDC13

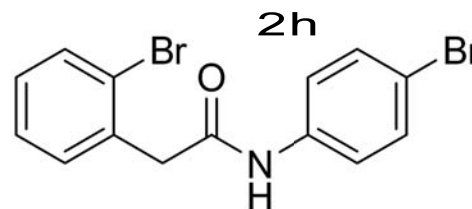

NAME XB20071126  
EXPNO 13  
PROCNO 1  
Date\_ 20071126  
Time 19.30  
INSTRUM spect  
PROBHD 5 mm PATXO 19F  
PULPROG zg30  
TD 65536  
SOLVENT CDC13  
NS 16  
DS 2  
SWH 10330.578 Hz  
FIDRES 0.157632 Hz  
AQ 3.1720407 sec  
RG 256  
DW 48.400 usec  
DE 6.00 usec  
TE 293.9 K  
D1 1.00000000 sec  
TD0 1

==== CHANNEL f1 =====  
NUC1 1H  
P1 14.50 usec  
PL1 2.00 dB  
SFO1 500.1330885 MHz  
SI 32768  
SF 500.1300000 MHz  
WDW no  
SSB 0  
LB 0.00 Hz  
GB 0  
PC 1.00

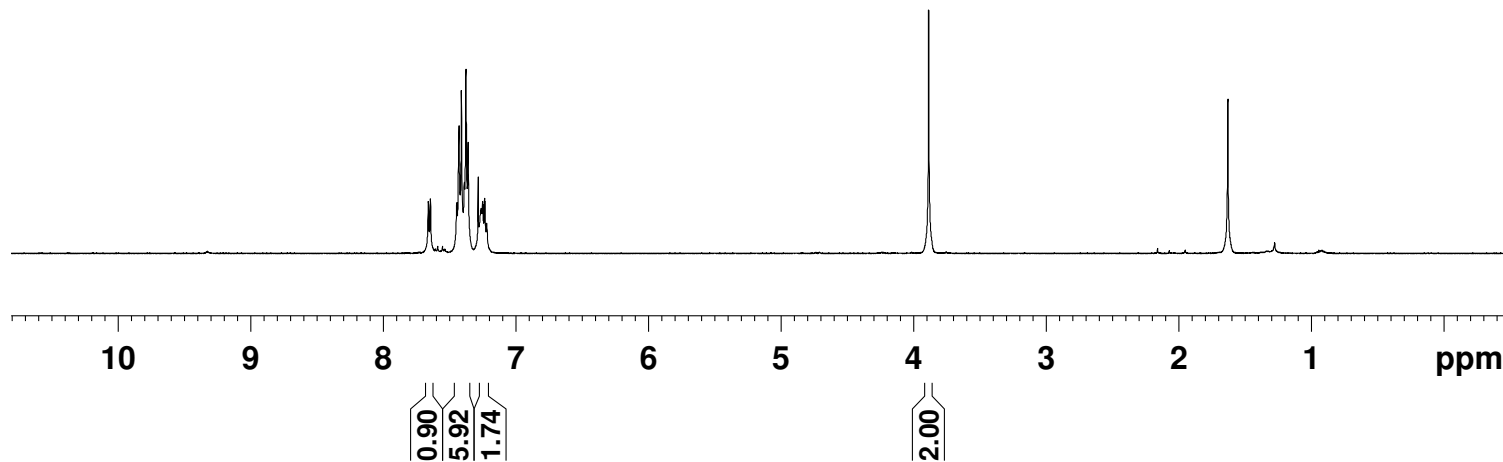



WSY-2-124  
C13CPD CDC13

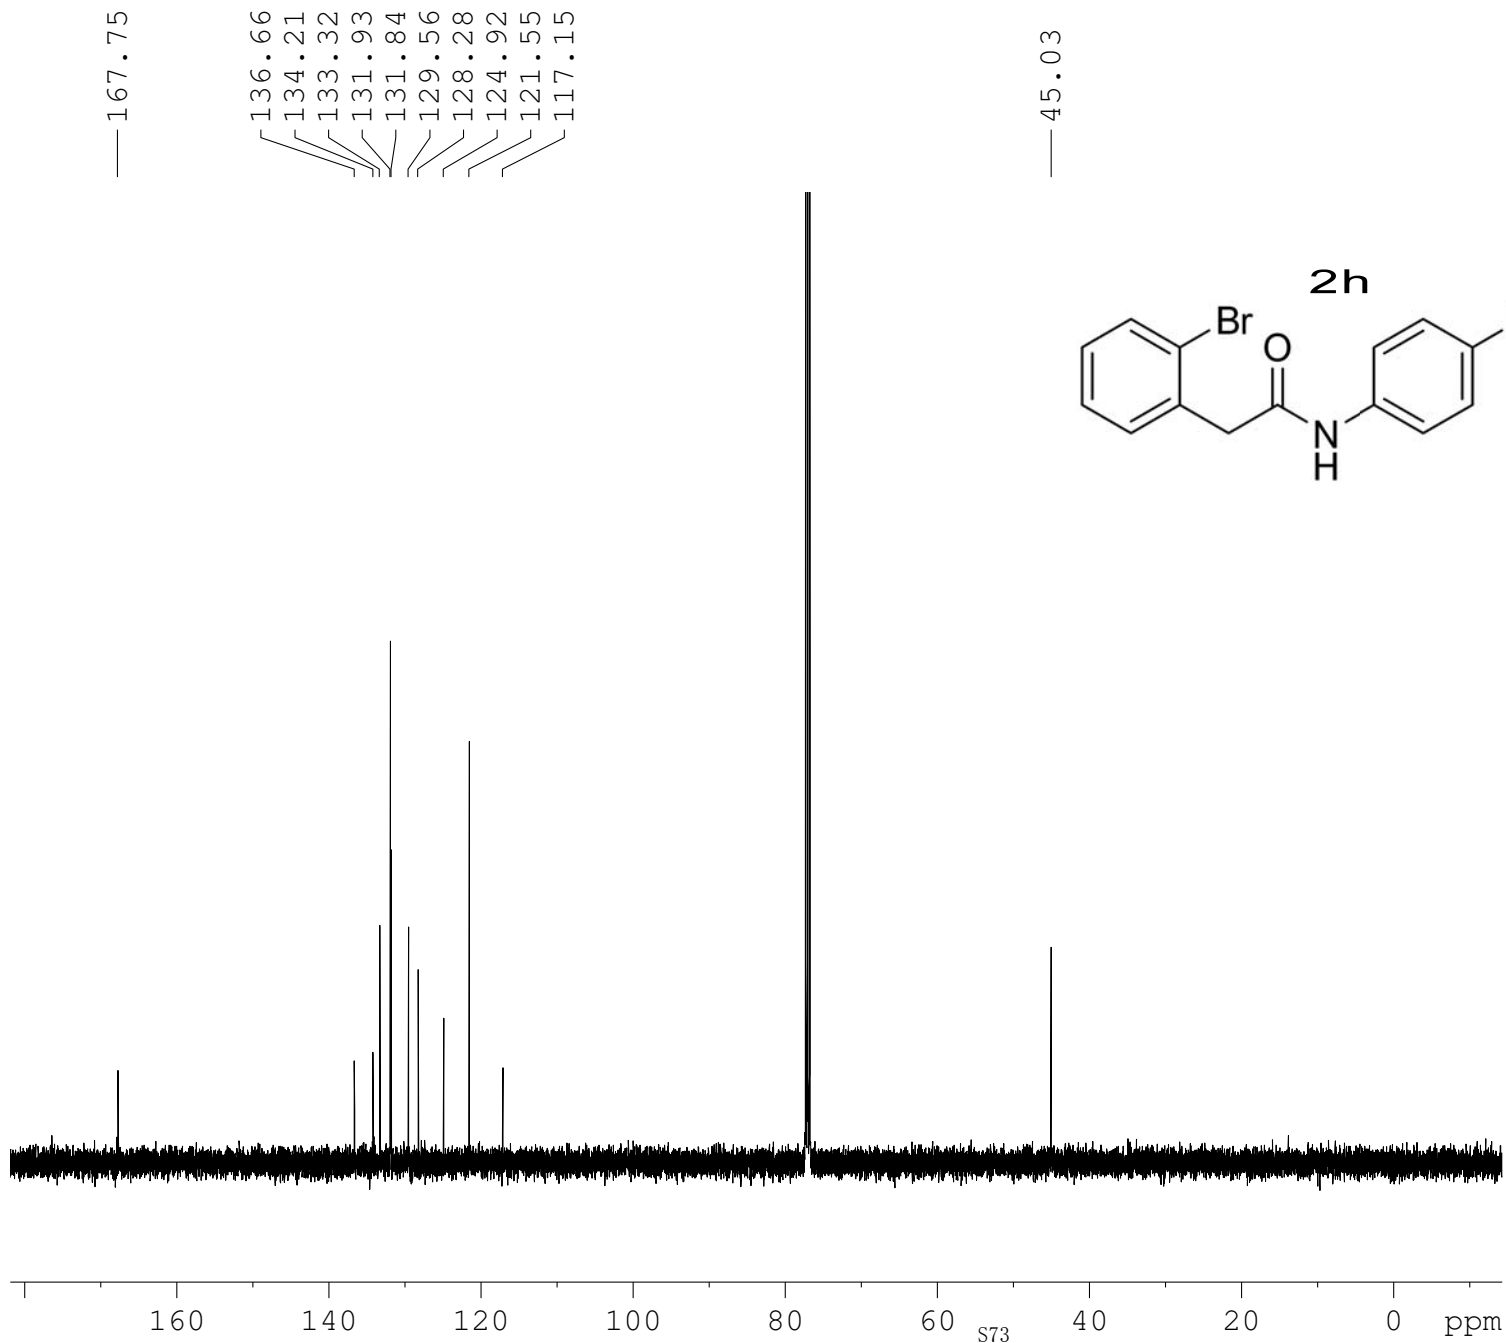

NAME XB20071127  
EXPNO 22  
PROCNO 1  
Date\_ 20071127  
Time 19.14  
INSTRUM spect  
PROBHD 5 mm PATXO 19F  
PULPROG zgpg30  
TD 65536  
SOLVENT CDC13  
NS 2048  
DS 4  
SWH 30030.029 Hz  
FIDRES 0.458222 Hz  
AQ 1.0912410 sec  
RG 181  
DW 16.650 usec  
DE 6.00 usec  
TE 295.4 K  
D1 2.00000000 sec  
d11 0.03000000 sec  
DELTA 1.89999998 sec  
TD0 1

==== CHANNEL f1 =====  
NUC1 13C  
P1 9.50 usec  
PL1 -0.50 dB  
SFO1 125.7703643 MHz

==== CHANNEL f2 =====  
CPDPRG2 waltz16  
NUC2 1H  
PCPD2 80.00 usec  
PL2 2.00 dB  
PL12 16.50 dB  
PL13 16.50 dB  
SFO2 500.1320005 MHz  
SI 32768  
SF 125.7577890 MHz  
WDW no  
SSB 0  
LB 0.00 Hz  
GB 0  
PC 1.40

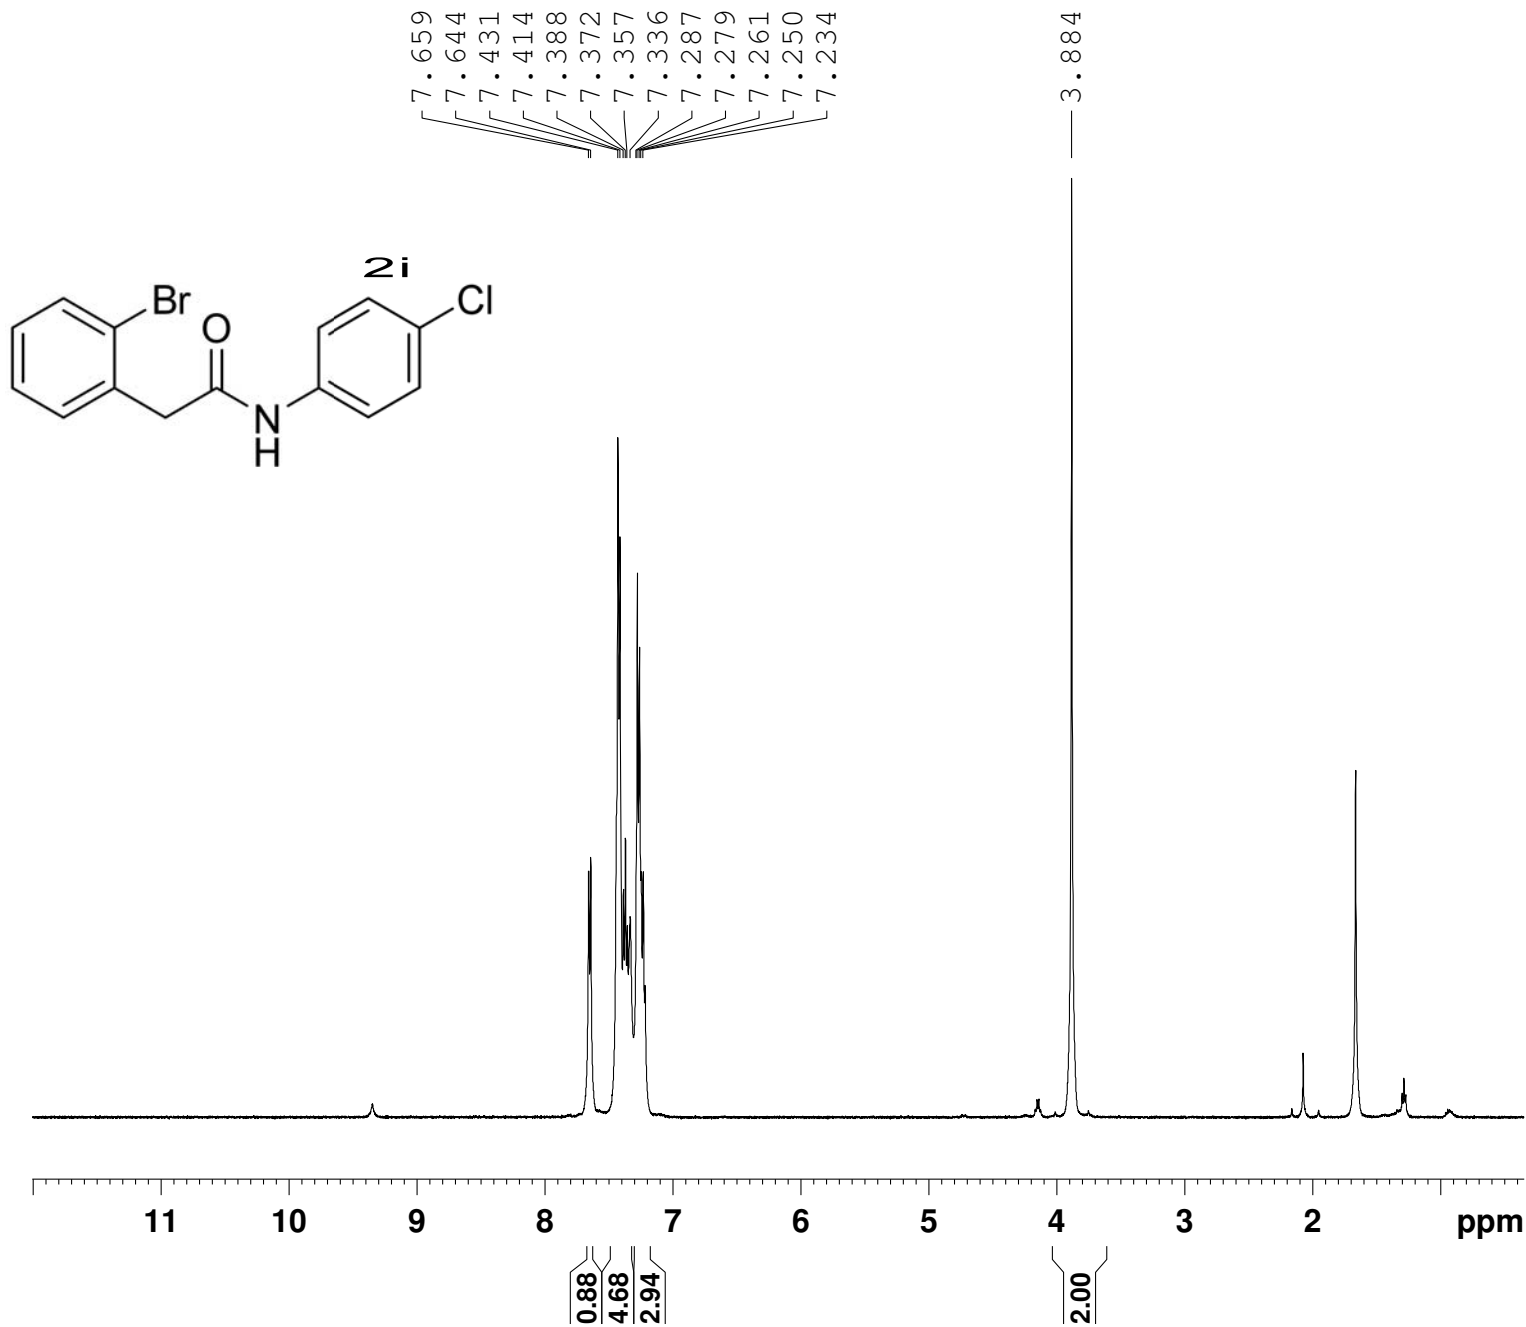

WSY-2-123  
PROTON CDC13 D:\\ deng 21

NAME XB20071126  
EXPNO 11  
PROCNO 1  
Date\_ 20071126  
Time 16.58  
INSTRUM spect  
PROBHD 5 mm PATXO 19F  
PULPROG zg30  
TD 65536  
SOLVENT CDC13  
NS 16  
DS 2  
SWH 10330.578 Hz  
FIDRES 0.157632 Hz  
AQ 3.1720407 sec  
RG 256  
DW 48.400 usec  
DE 6.00 usec  
TE 293.2 K  
D1 1.00000000 sec  
TD0 1

==== CHANNEL f1 =====  
NUC1 1H  
P1 14.50 usec  
PL1 2.00 dB  
SFO1 500.1330885 MHz  
SI 32768  
SF 500.1299990 MHz  
WDW no  
SSB 0  
LB 0.00 Hz  
GB 0  
PC 1.00

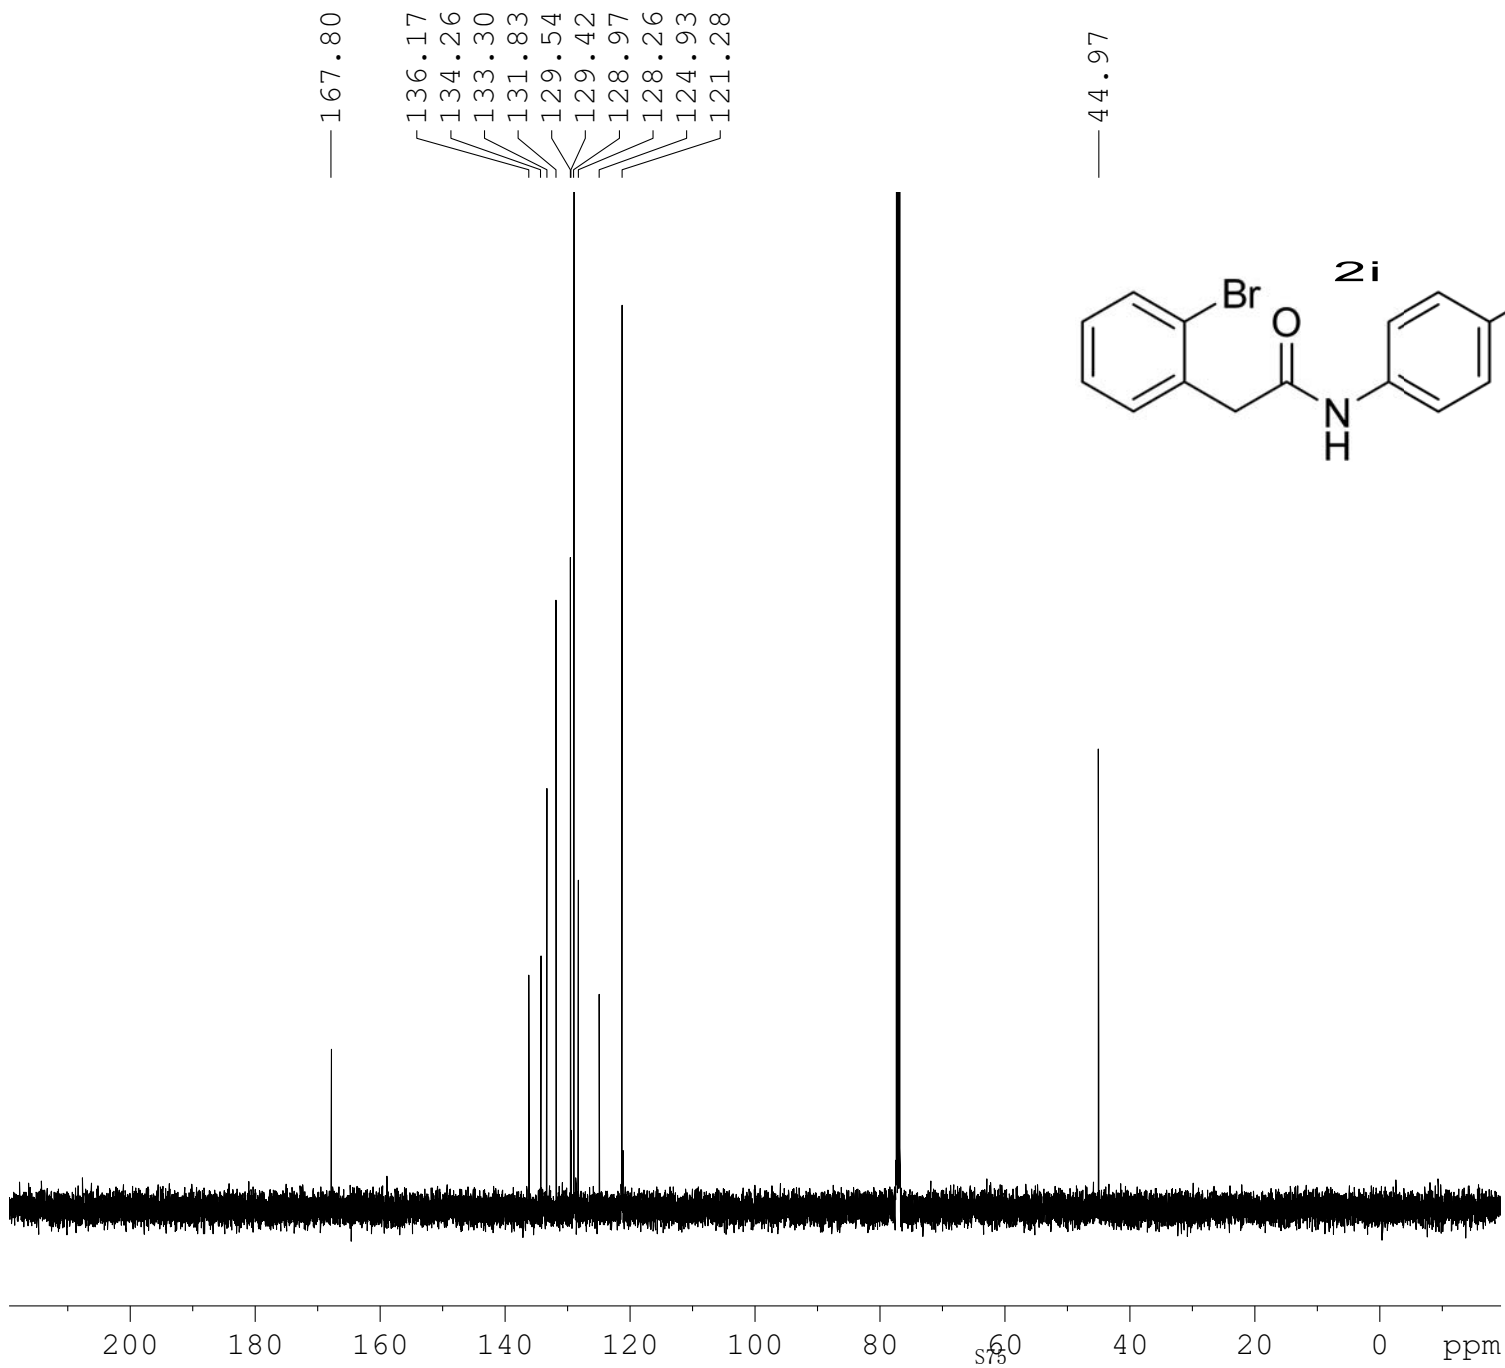

WSY-2-123  
C13CPD CDC13

NAME XB20071127  
EXPNO 23  
PROCNO 1  
Date\_ 20071127  
Time 21.09  
INSTRUM spect  
PROBHD 5 mm PATXO 19F  
PULPROG zgpg30  
TD 65536  
SOLVENT CDC13  
NS 2048  
DS 4  
SWH 30030.029 Hz  
FIDRES 0.458222 Hz  
AQ 1.0912410 sec  
RG 181  
DW 16.650 usec  
DE 6.00 usec  
TE 295.4 K  
D1 2.00000000 sec  
d11 0.03000000 sec  
DELTA 1.89999998 sec  
TD0 1

==== CHANNEL f1 =====  
NUC1 13C  
P1 9.50 usec  
PL1 -0.50 dB  
SF01 125.7703643 MHz

==== CHANNEL f2 =====  
CPDPRG2 waltz16  
NUC2 1H  
PCPD2 80.00 usec  
PL2 2.00 dB  
PL12 16.50 dB  
PL13 16.50 dB  
SFO2 500.1320005 MHz  
SI 32768  
SF 125.7577890 MHz  
WDW no  
SSB 0  
LB 0.00 Hz  
GB 0  
PC 1.40

SUNJ-2-144-2  
PROTON CDC13 D:\ deng 2

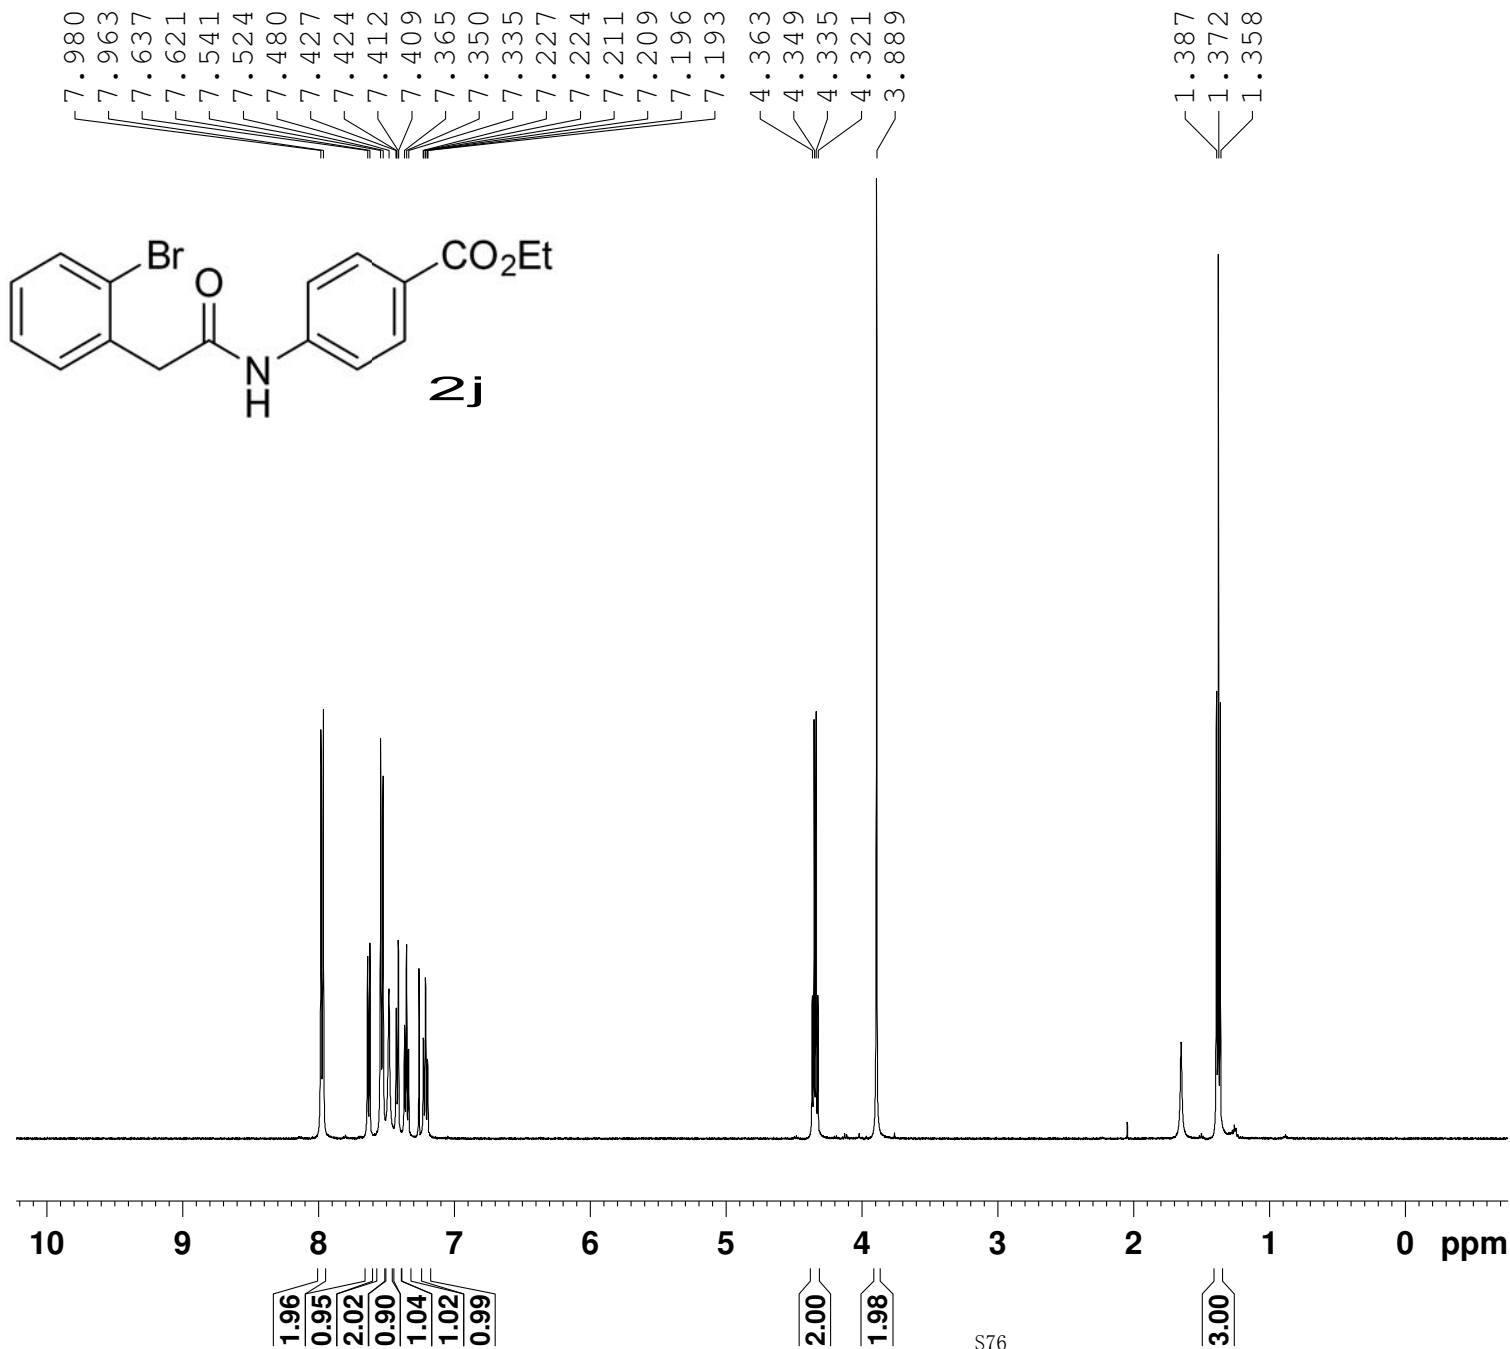

NAME xb20120312  
EXPNO 5  
PROCNO 1  
Date\_ 20120312  
Time 9.58  
INSTRUM spect  
PROBHD 5 mm PATXO 19F  
PULPROG zg30  
TD 65536  
SOLVENT CDC13  
NS 8  
DS 2  
SWH 10330.578 Hz  
FIDRES 0.157632 Hz  
AQ 3.1720407 sec  
RG 287.4  
DW 48.400 usec  
DE 6.00 usec  
TE 293.8 K  
D1 1.00000000 sec  
TD0 1

===== CHANNEL f1 =====  
NUC1 1H  
P1 13.70 usec  
PL1 1.00 dB  
SFO1 500.1330885 MHz  
SI 32768  
SF 500.1300137 MHz  
WDW no  
SSB 0  
LB 0.00 Hz  
GB 0  
PC 1.00

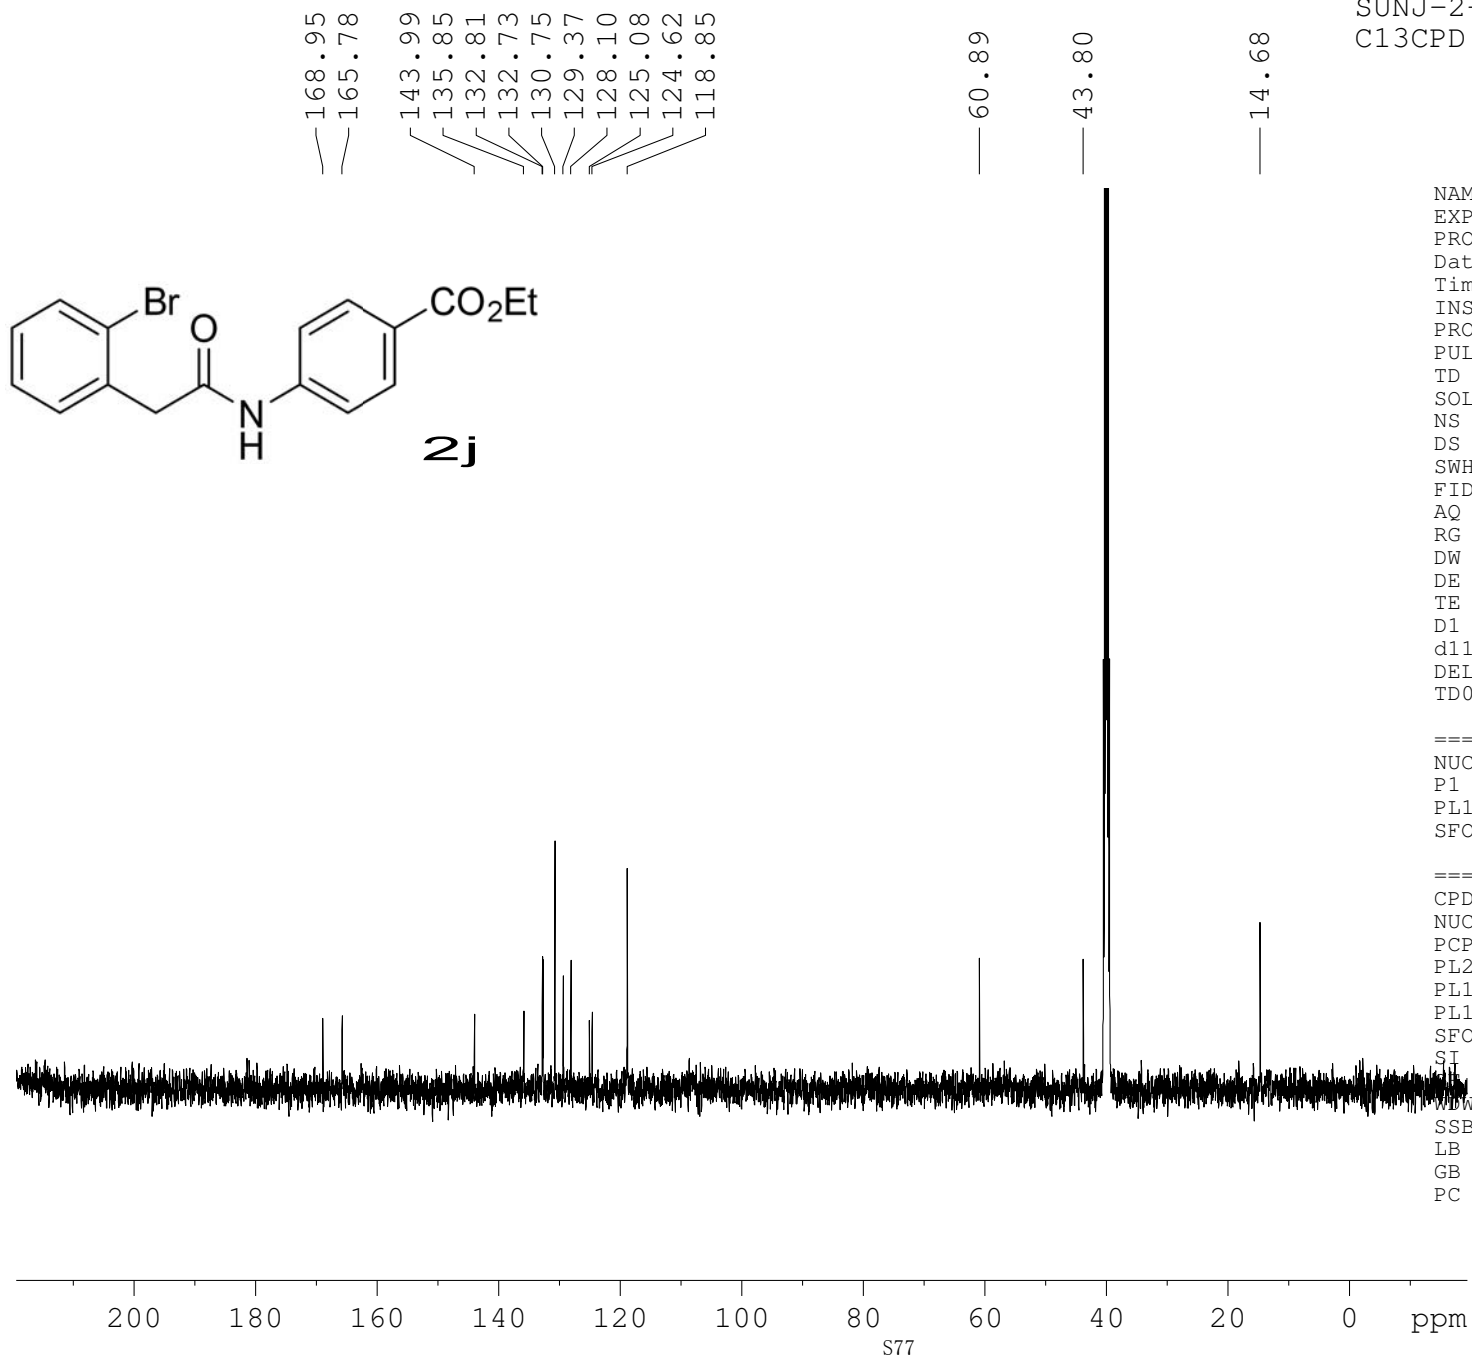

SUNJ-2-148-5  
C13CPD DMSO D:\ deng 58

```
NAME          XB20120314
EXPNO         9
PROCNO        1
Date_         20120314
Time          10.54
INSTRUM       spect
PROBHD        5 mm PATXO 19F
PULPROG       zgpg30
TD            65536
SOLVENT       DMSO
NS            128
DS            4
SWH           30030.029 Hz
FIDRES        0.458222 Hz
AQ            1.0912410 sec
RG            90.5
DW            16.650 usec
DE            6.00 usec
TE            295.3 K
D1            2.00000000 sec
d11           0.03000000 sec
DELTA         1.89999998 sec
TD0           1

===== CHANNEL f1 =====
NUC1          13C
P1            9.50 usec
PL1           -0.50 dB
SFO1          125.7703643 MHz

===== CHANNEL f2 =====
CPDPRG2       waltz16
NUC2          1H
PCPD2         80.00 usec
PL2           1.00 dB
PL12          16.33 dB
PL13          16.50 dB
SFO2          500.1320005 MHz
SI            32768
WDW           125.7577890 MHz
SSB           EM
LB            3.00 Hz
GB            0
PC            1.40
```

SUNJ-1-308-1  
PROTON DMSO D:\ deng 42

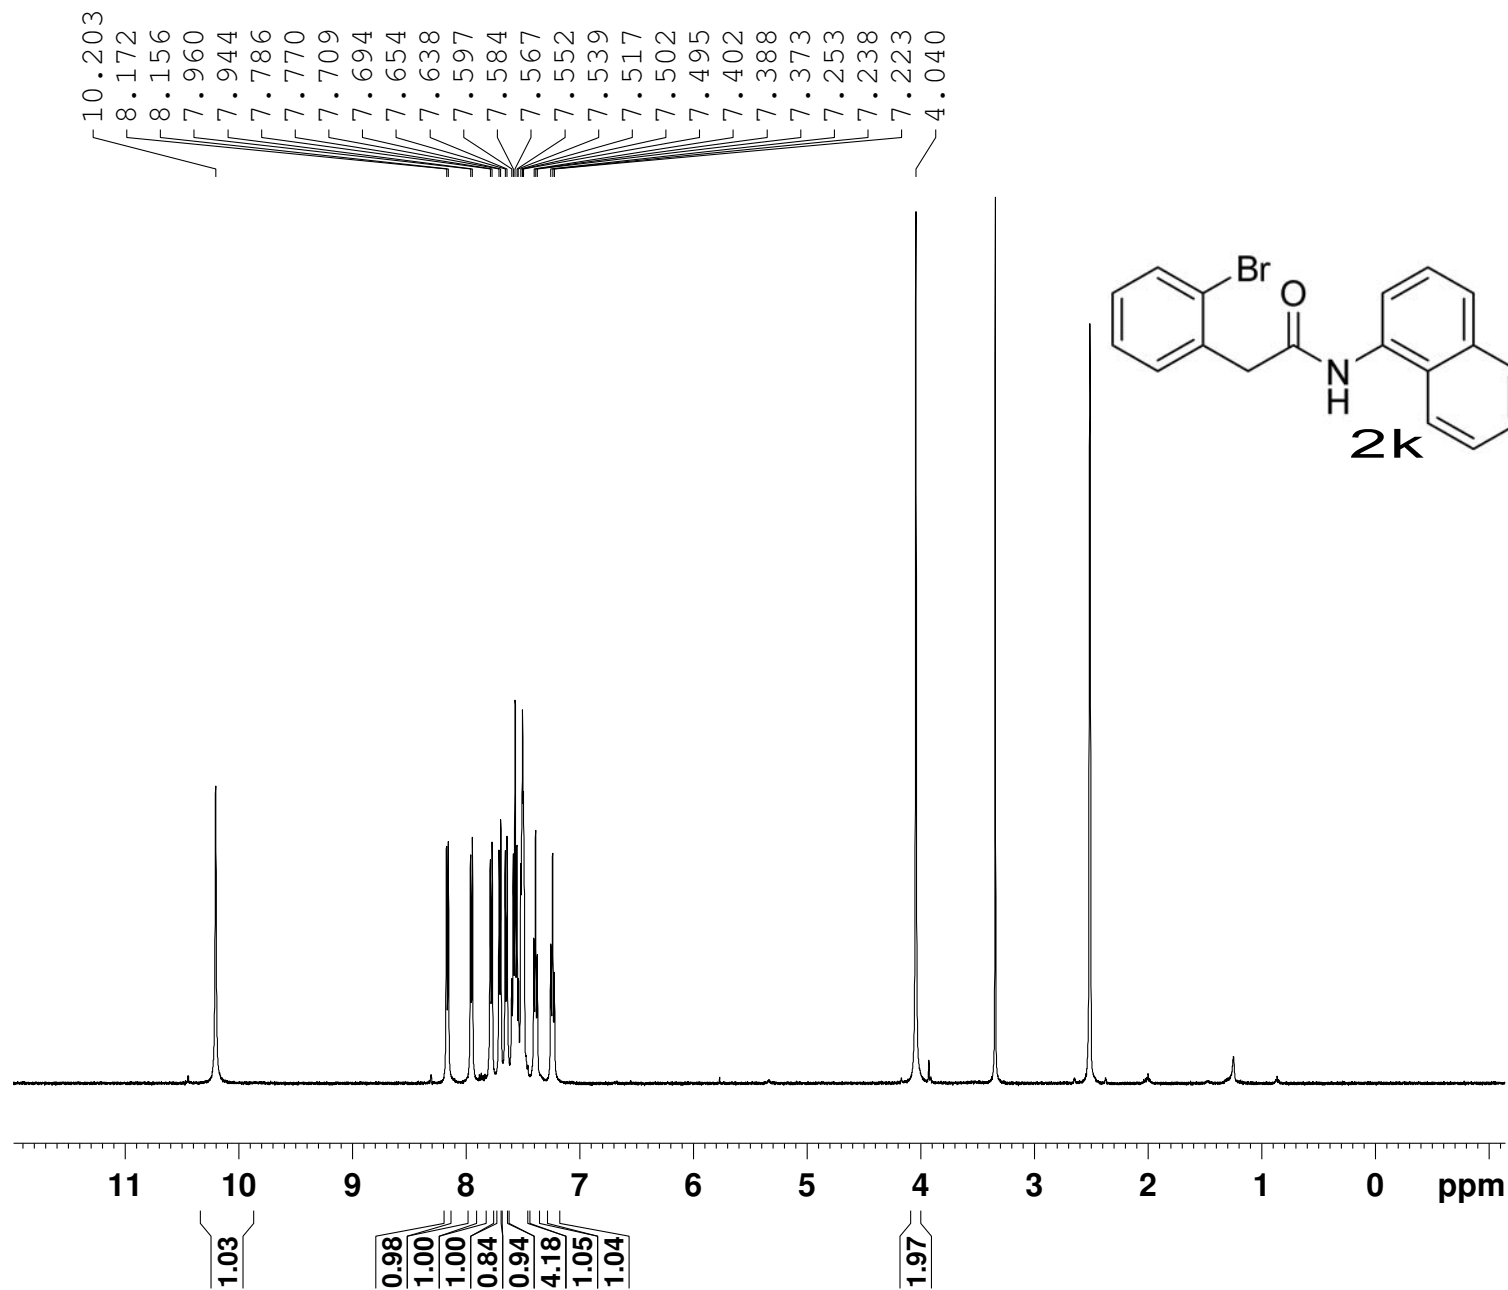

NAME xb20111011  
EXPNO 6  
PROCNO 1  
Date\_ 20111011  
Time 15.15  
INSTRUM spect  
PROBHD 5 mm PATXO 19F  
PULPROG zg30  
TD 65536  
SOLVENT DMSO  
NS 16  
DS 2  
SWH 10330.578 Hz  
FIDRES 0.157632 Hz  
AQ 3.1720407 sec  
RG 287.4  
DW 48.400 usec  
DE 6.00 usec  
TE 296.6 K  
D1 1.00000000 sec  
TD0 1

===== CHANNEL f1 =====  
NUC1 1H  
P1 14.66 usec  
PL1 1.00 dB  
SFO1 500.1330885 MHz  
SI 32768  
SF 500.1300000 MHz  
WDW no  
SSB 0  
LB 0.00 Hz  
GB 0  
PC 1.00

SUNJ-1-308-1  
C13CPD DMSO D:\ deng 14

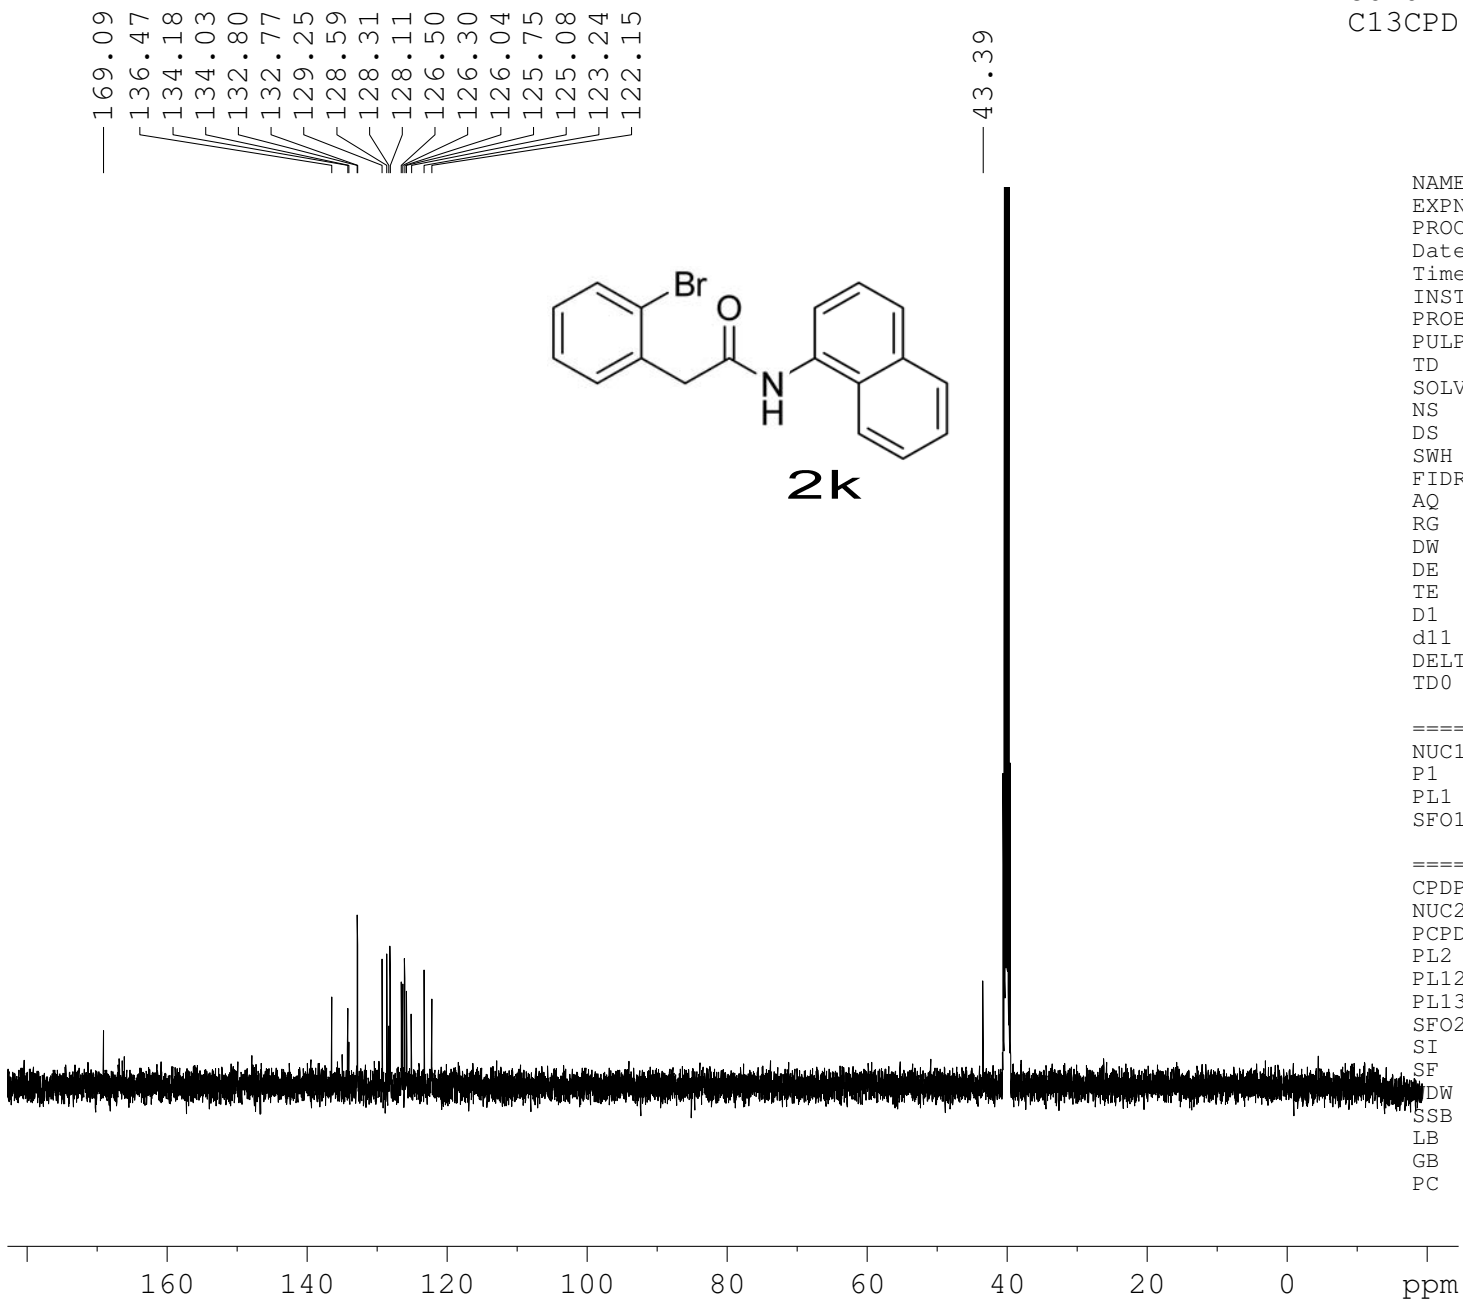

```
NAME          XB20111012A
EXPNO         6
PROCNO       1
Date_        20111012
Time         9.11
INSTRUM      spect
PROBHD       5 mm PATXO 19F
PULPROG      zgpg30
TD           65536
SOLVENT      DMSO
NS           128
DS           4
SWH          30030.029 Hz
FIDRES       0.458222 Hz
AQ           1.0912410 sec
RG           228.1
DW           16.650 usec
DE           6.00 usec
TE           297.1 K
D1           2.00000000 sec
d11          0.03000000 sec
DELTA        1.89999998 sec
TD0          1

===== CHANNEL f1 =====
NUC1          13C
P1            9.50 usec
PL1           -0.50 dB
SFO1          125.7703643 MHz

===== CHANNEL f2 =====
CPDPRG2      waltz16
NUC2          1H
PCPD2        80.00 usec
PL2           2.00 dB
PL12         16.50 dB
PL13         16.50 dB
SFO2          500.1320005 MHz
SI           32768
SF           125.7577890 MHz
DW           EM
SSB           0
LB           1.00 Hz
GB           0
PC           1.40
```

SUNJ-3-60  
PROTON DMSO D:\ deng 41

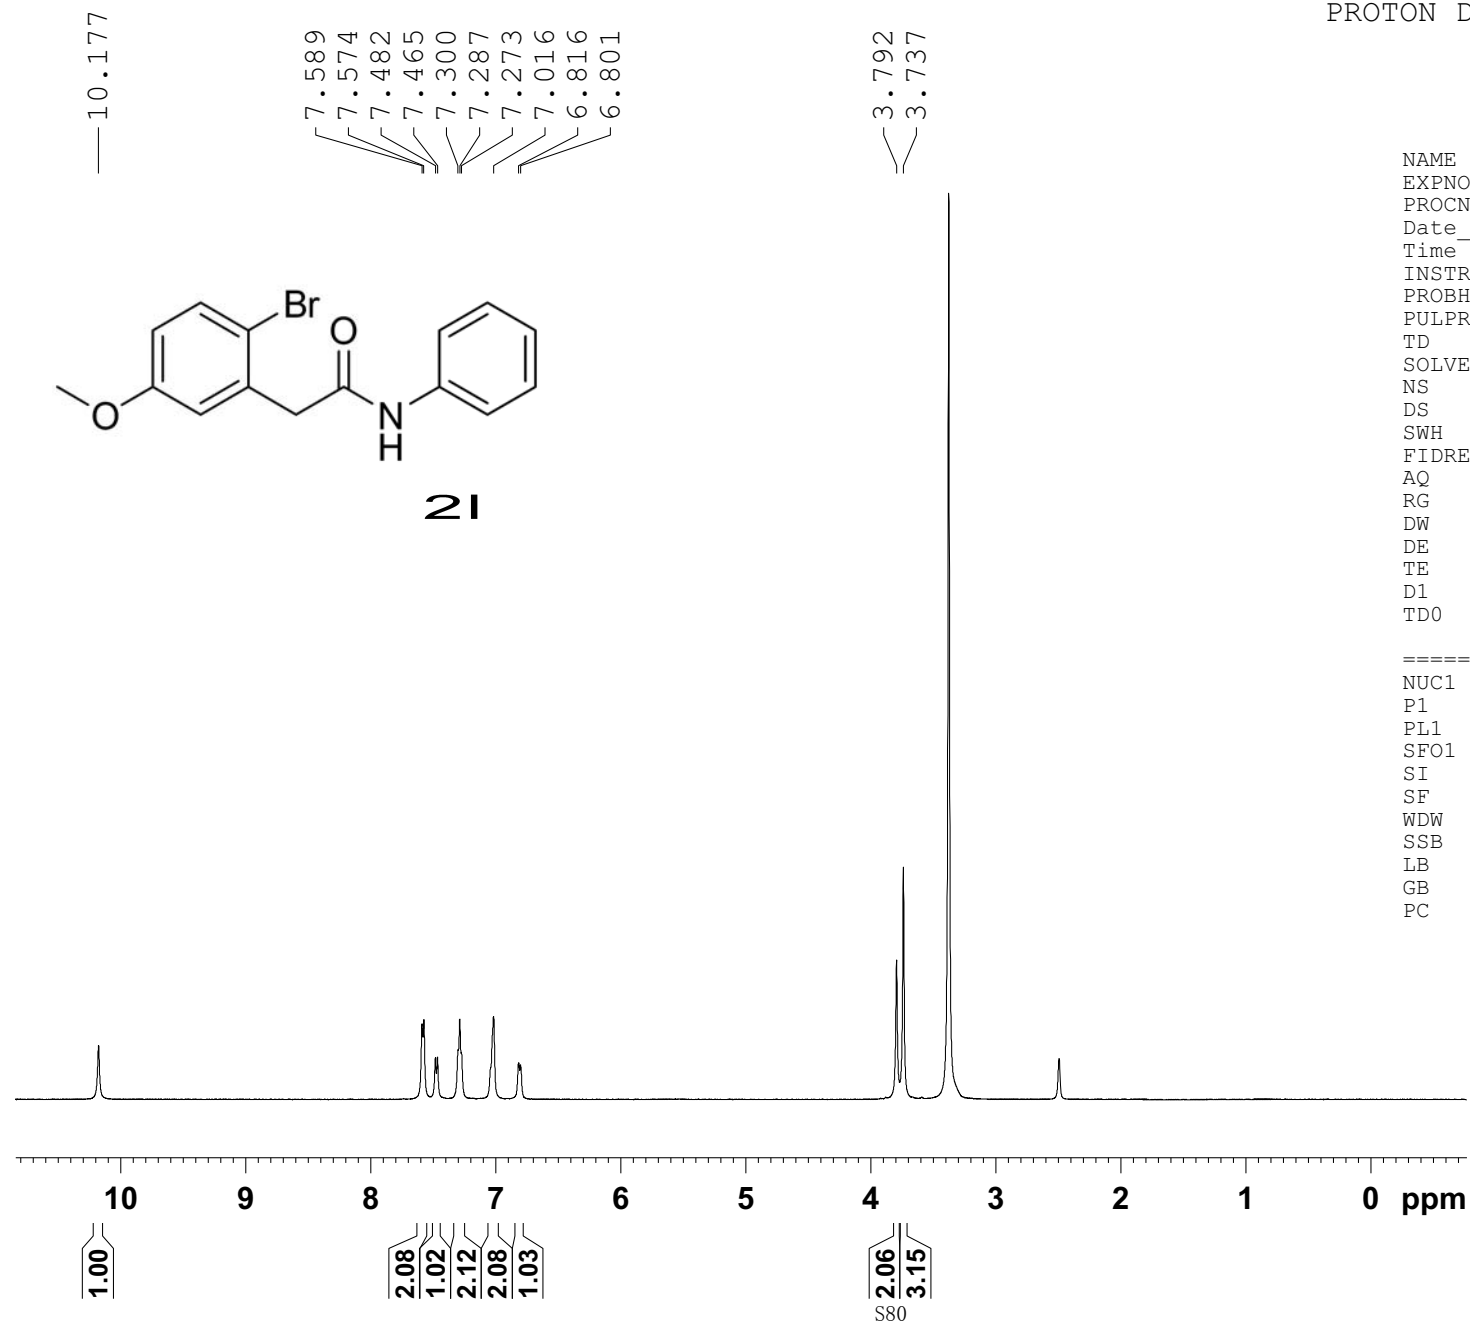

```
NAME          XB20120612
EXPNO          4
PROCNO         1
Date_          20120612
Time           13.13
INSTRUM        spect
PROBHD         5 mm PATXO 19F
PULPROG        zg30
TD             65536
SOLVENT        CDC13
NS             8
DS             2
SWH            10330.578 Hz
FIDRES         0.157632 Hz
AQ             3.1720407 sec
RG             128
DW             48.400 usec
DE             6.00 usec
TE             296.4 K
D1             1.00000000 sec
TD0            1
```

```
===== CHANNEL f1 =====
NUC1           1H
P1             13.72 usec
PL1            1.00 dB
SFO1           500.1330885 MHz
SI             32768
SF             500.1323831 MHz
WDW            no
SSB            0
LB             0.00 Hz
GB             0
PC             1.00
```



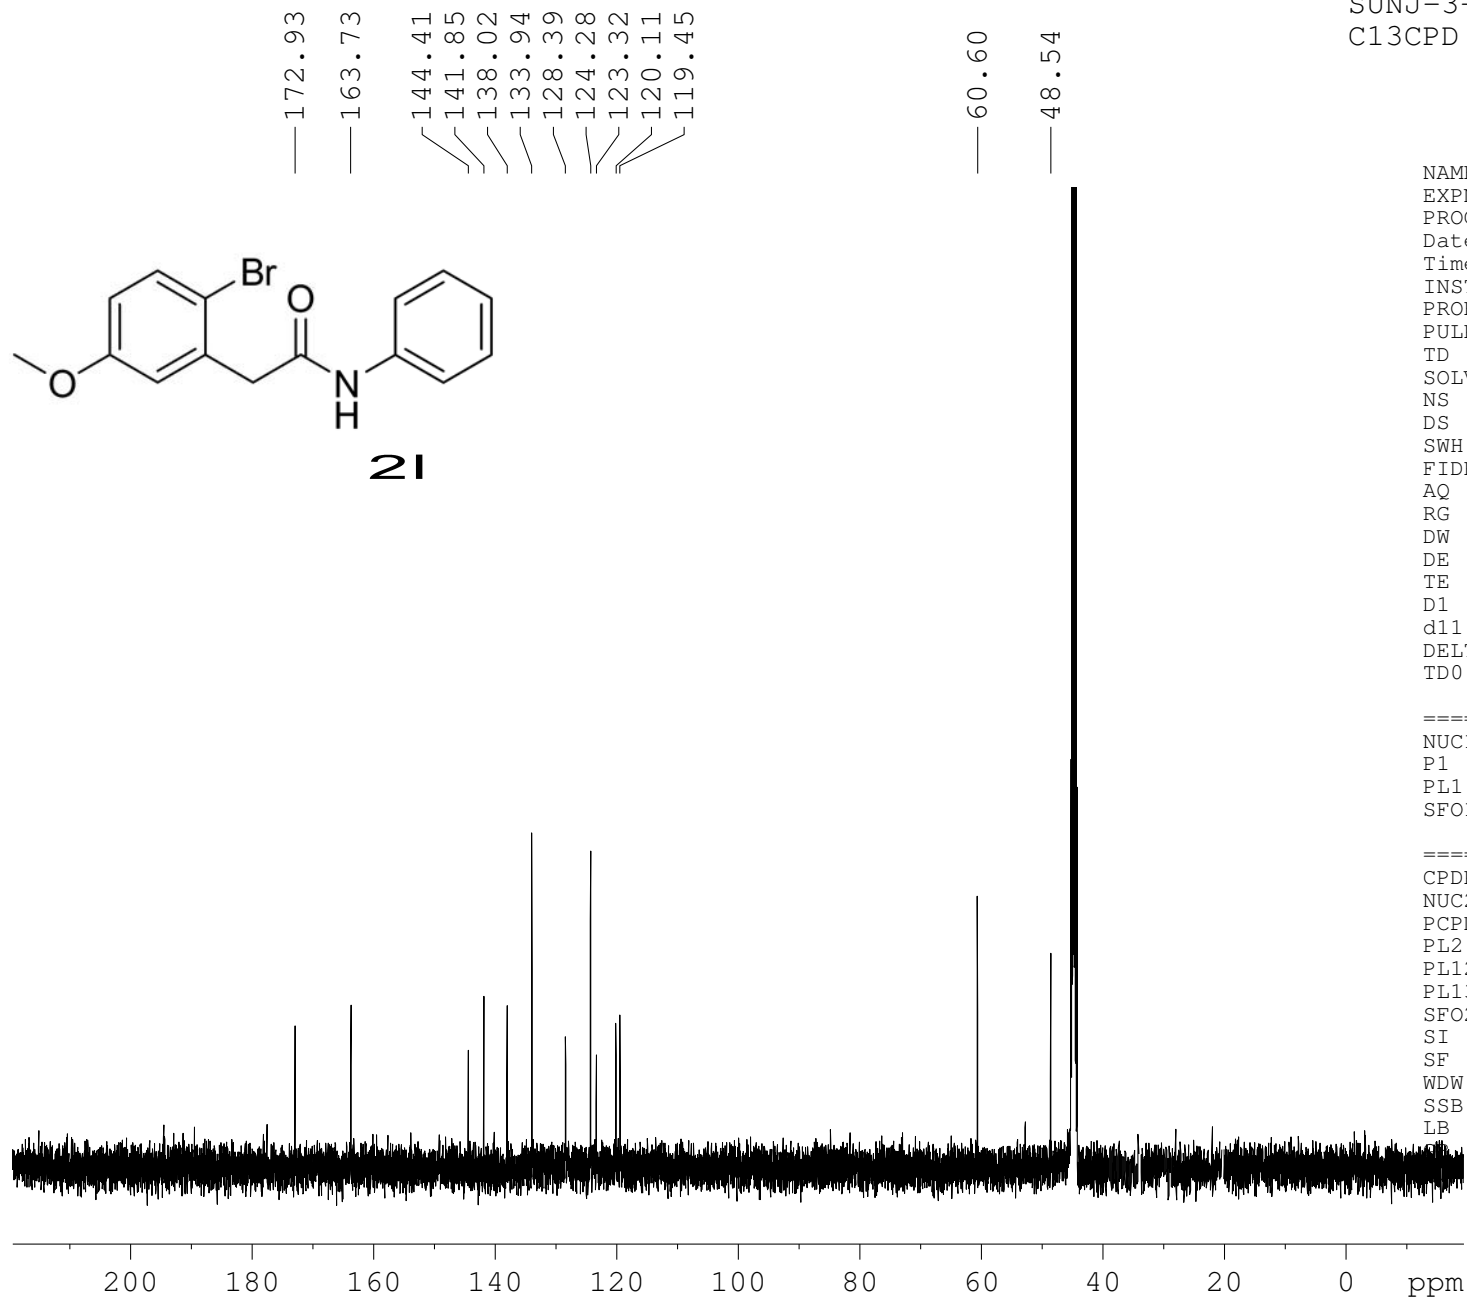

SUNJ-3-60  
C13CPD DMSO D:\ deng 41

NAME XB20120612  
EXPNO 6  
PROCNO 1  
Date\_ 20120612  
Time 13.24  
INSTRUM spect  
PROBHD 5 mm PATXO 19F  
PULPROG zgpg30  
TD 65536  
SOLVENT DMSO  
NS 128  
DS 4  
SWH 30030.029 Hz  
FIDRES 0.458222 Hz  
AQ 1.0912410 sec  
RG 406.4  
DW 16.650 usec  
DE 6.00 usec  
TE 297.6 K  
D1 2.00000000 sec  
d11 0.03000000 sec  
DELTA 1.89999998 sec  
TD0 1

==== CHANNEL f1 =====  
NUC1 13C  
P1 9.50 usec  
PL1 -0.50 dB  
SFO1 125.7703643 MHz

==== CHANNEL f2 =====  
CPDPRG2 waltz16  
NUC2 1H  
PCPD2 80.00 usec  
PL2 1.00 dB  
PL12 16.31 dB  
PL13 16.50 dB  
SFO2 500.1320005 MHz  
SI 32768  
SF 125.7577890 MHz  
WDW EM  
SSB 0  
LB 1.00 Hz  
GB 0  
PC 1.40

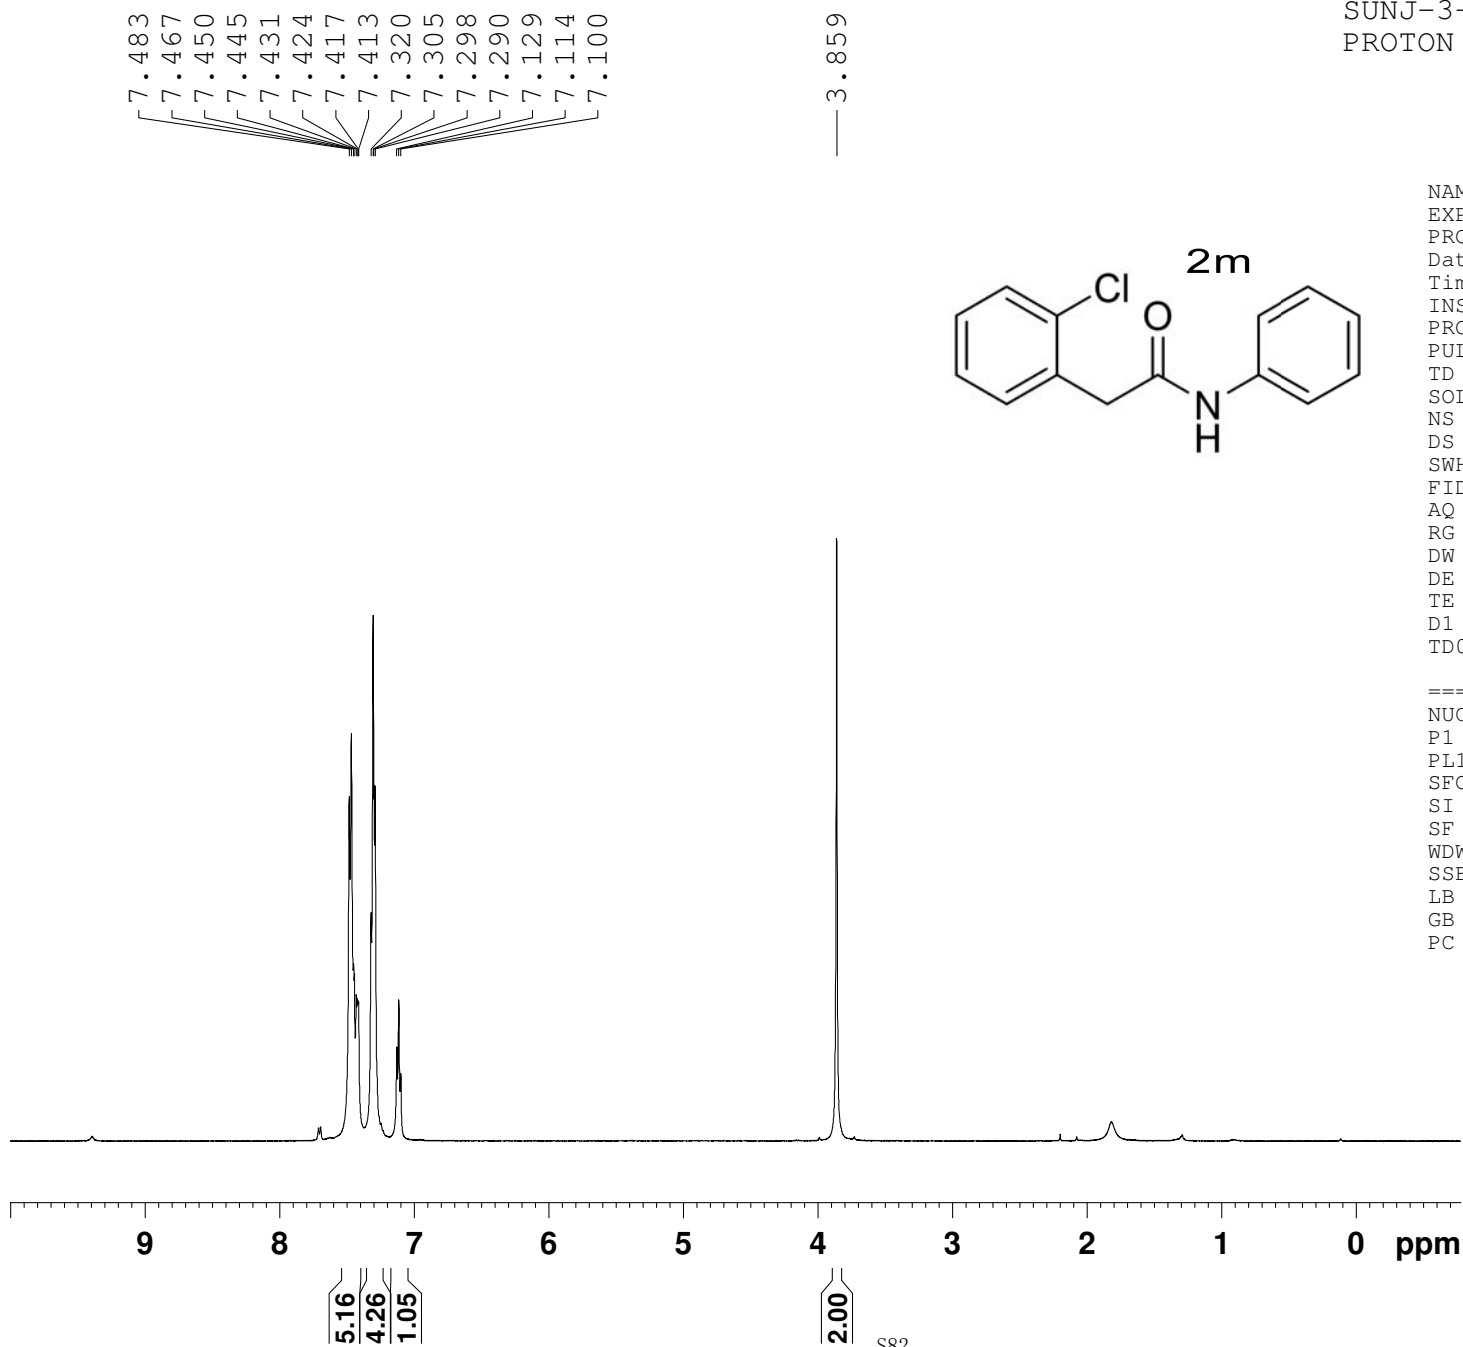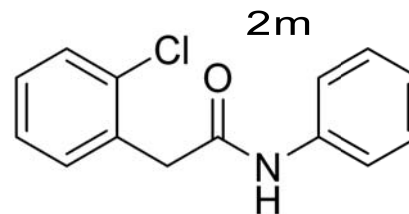

SUNJ-3-109H  
PROTON CDCl3 D:\\ deng 3

```
NAME          XB20120810
EXPNO         16
PROCNO        1
Date_         20120810
Time          12.25
INSTRUM       spect
PROBHD        5 mm PATXO 19F
PULPROG       zg30
TD            65536
SOLVENT       CDCl3
NS            8
DS            2
SWH           10330.578 Hz
FIDRES        0.157632 Hz
AQ            3.1720407 sec
RG            143.7
DW            48.400 usec
DE            6.00 usec
TE            296.0 K
D1            1.00000000 sec
TD0           1

===== CHANNEL f1 =====
NUC1           1H
P1             13.72 usec
PL1            1.00 dB
SFO1           500.1330885 MHz
SI             32768
SF             500.1300000 MHz
WDW            no
SSB            0
LB             0.00 Hz
GB             0
PC             1.00
```

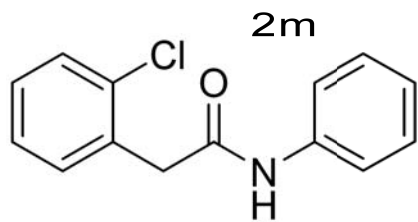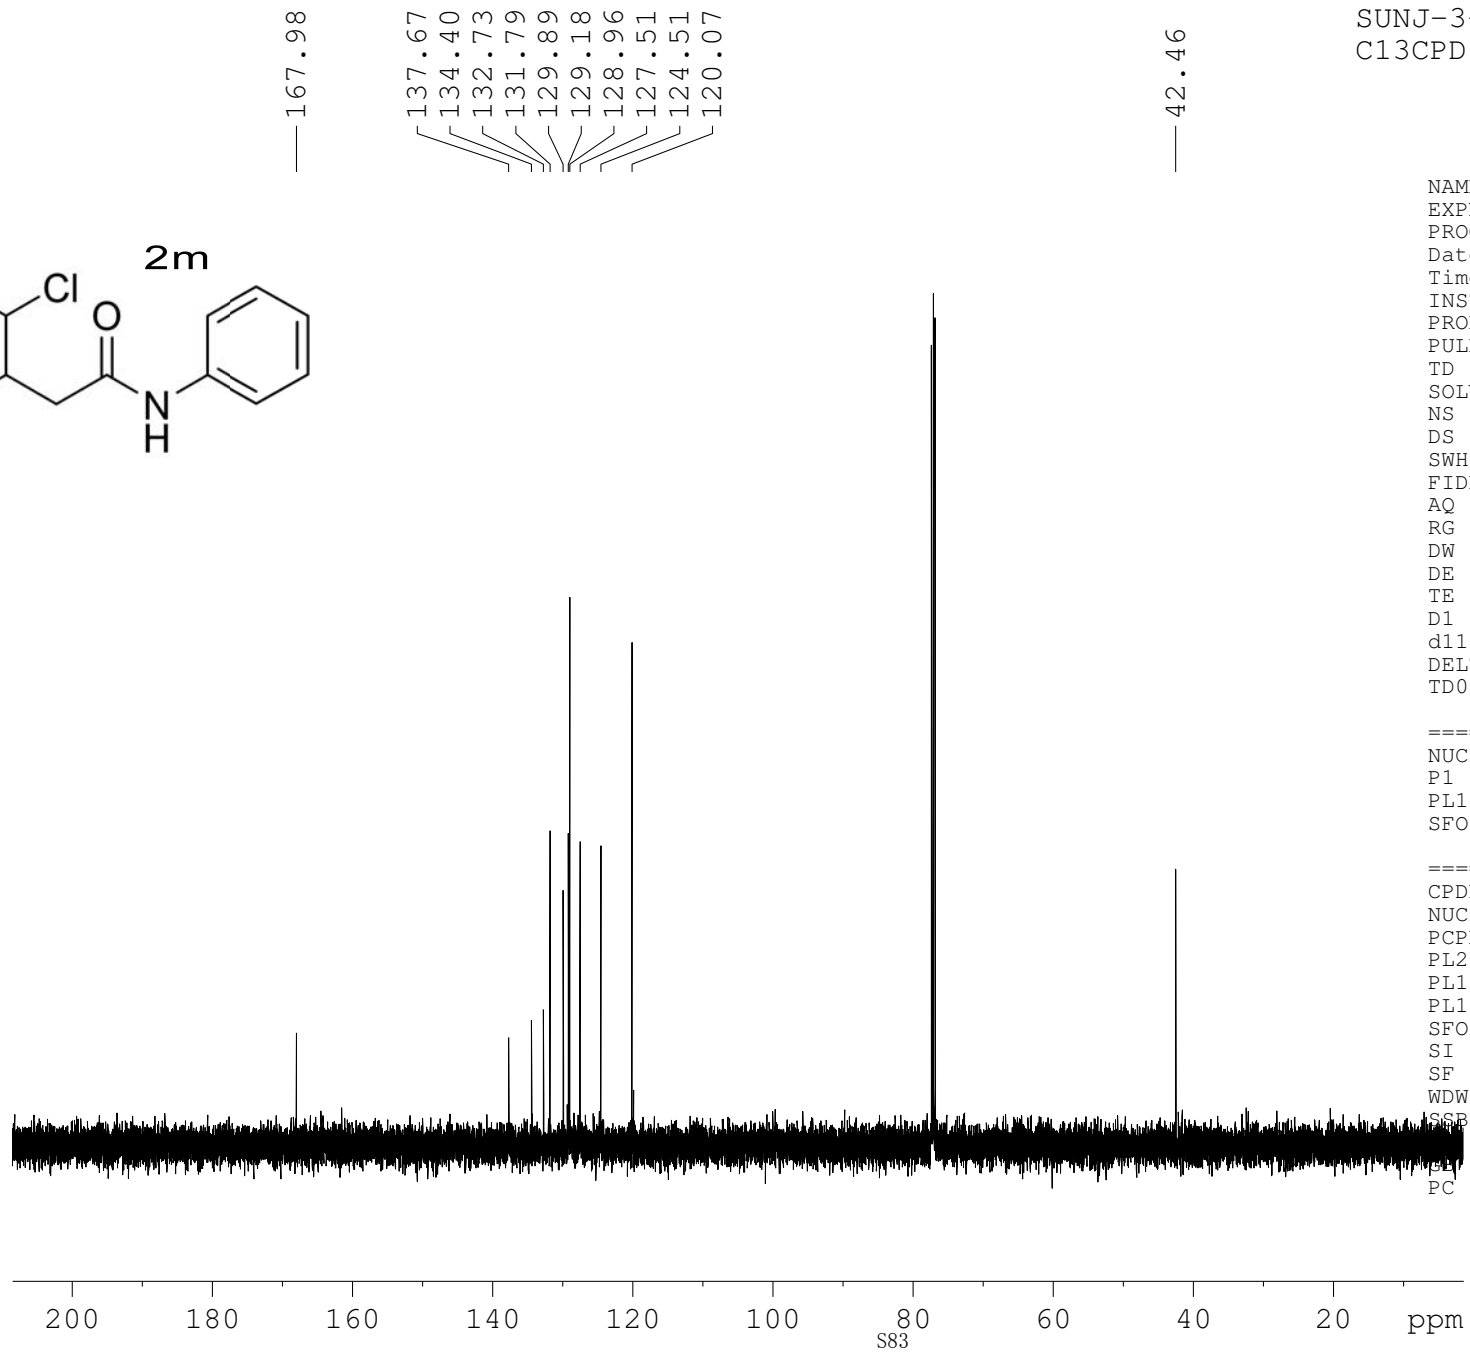

SUNJ-3-109H  
C13CPD CDC13 D:\\ deng 3

NAME XB20120810  
EXPNO 17  
PROCNO 1  
Date\_ 20120810  
Time 12.33  
INSTRUM spect  
PROBHD 5 mm PATXO 19F  
PULPROG zgpg30  
TD 65536  
SOLVENT CDC13  
NS 128  
DS 4  
SWH 30030.029 Hz  
FIDRES 0.458222 Hz  
AQ 1.0912410 sec  
RG 128  
DW 16.650 usec  
DE 6.00 usec  
TE 297.1 K  
D1 2.00000000 sec  
d11 0.03000000 sec  
DELTA 1.89999998 sec  
TD0 1

==== CHANNEL f1 =====  
NUC1 13C  
P1 9.50 usec  
PL1 -0.50 dB  
SFO1 125.7703643 MHz

==== CHANNEL f2 =====  
CPDPRG2 waltz16  
NUC2 1H  
PCPD2 80.00 usec  
PL2 1.00 dB  
PL12 16.31 dB  
PL13 16.50 dB  
SFO2 500.1320005 MHz  
SI 32768  
SF 125.7577890 MHz  
WDW no  
SSB 0  
GB 0.00 Hz  
PC 1.40

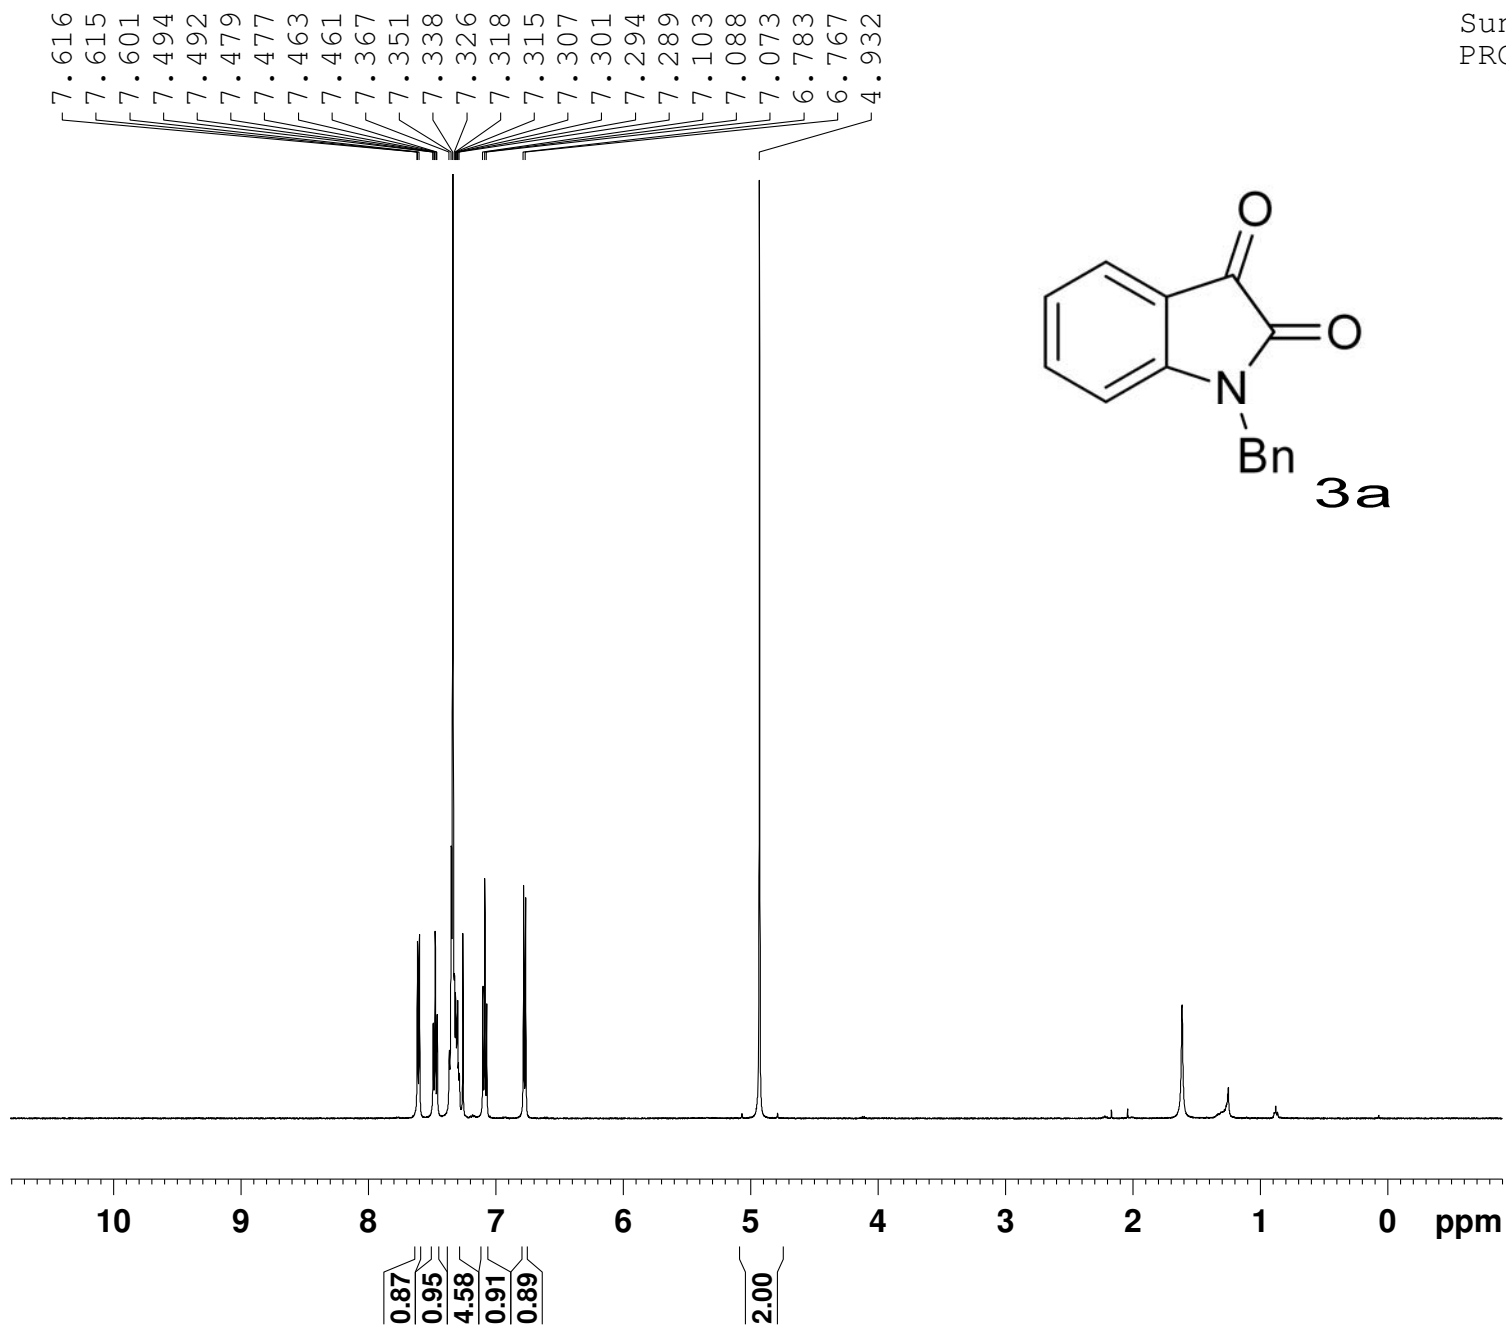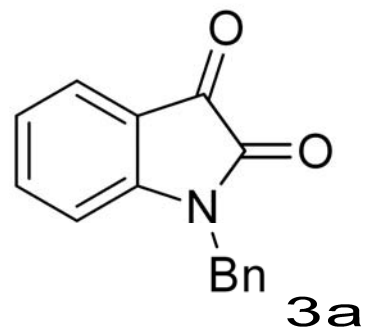

SunJ-1-288-3  
PROTON CDC13 D:\ deng 13

|         |                |
|---------|----------------|
| NAME    | xb20110928     |
| EXPNO   | 7              |
| PROCNO  | 1              |
| Date_   | 20110928       |
| Time    | 14.02          |
| INSTRUM | spect          |
| PROBHD  | 5 mm PATXO 19F |
| PULPROG | zg30           |
| TD      | 65536          |
| SOLVENT | CDC13          |
| NS      | 16             |
| DS      | 2              |
| SWH     | 10330.578 Hz   |
| FIDRES  | 0.157632 Hz    |
| AQ      | 3.1720407 sec  |
| RG      | 256            |
| DW      | 48.400 usec    |
| DE      | 6.00 usec      |
| TE      | 296.5 K        |
| D1      | 1.00000000 sec |
| TD0     | 1              |

==== CHANNEL f1 =====

|      |                 |
|------|-----------------|
| NUC1 | 1H              |
| P1   | 13.76 usec      |
| PL1  | 1.00 dB         |
| SFO1 | 500.1330885 MHz |
| SI   | 32768           |
| SF   | 500.1300131 MHz |
| WDW  | no              |
| SSB  | 0               |
| LB   | 0.00 Hz         |
| GB   | 0               |
| PC   | 1.00            |

SUNJ-1-288-3  
C13CPD CDC13 D:\ deng 49

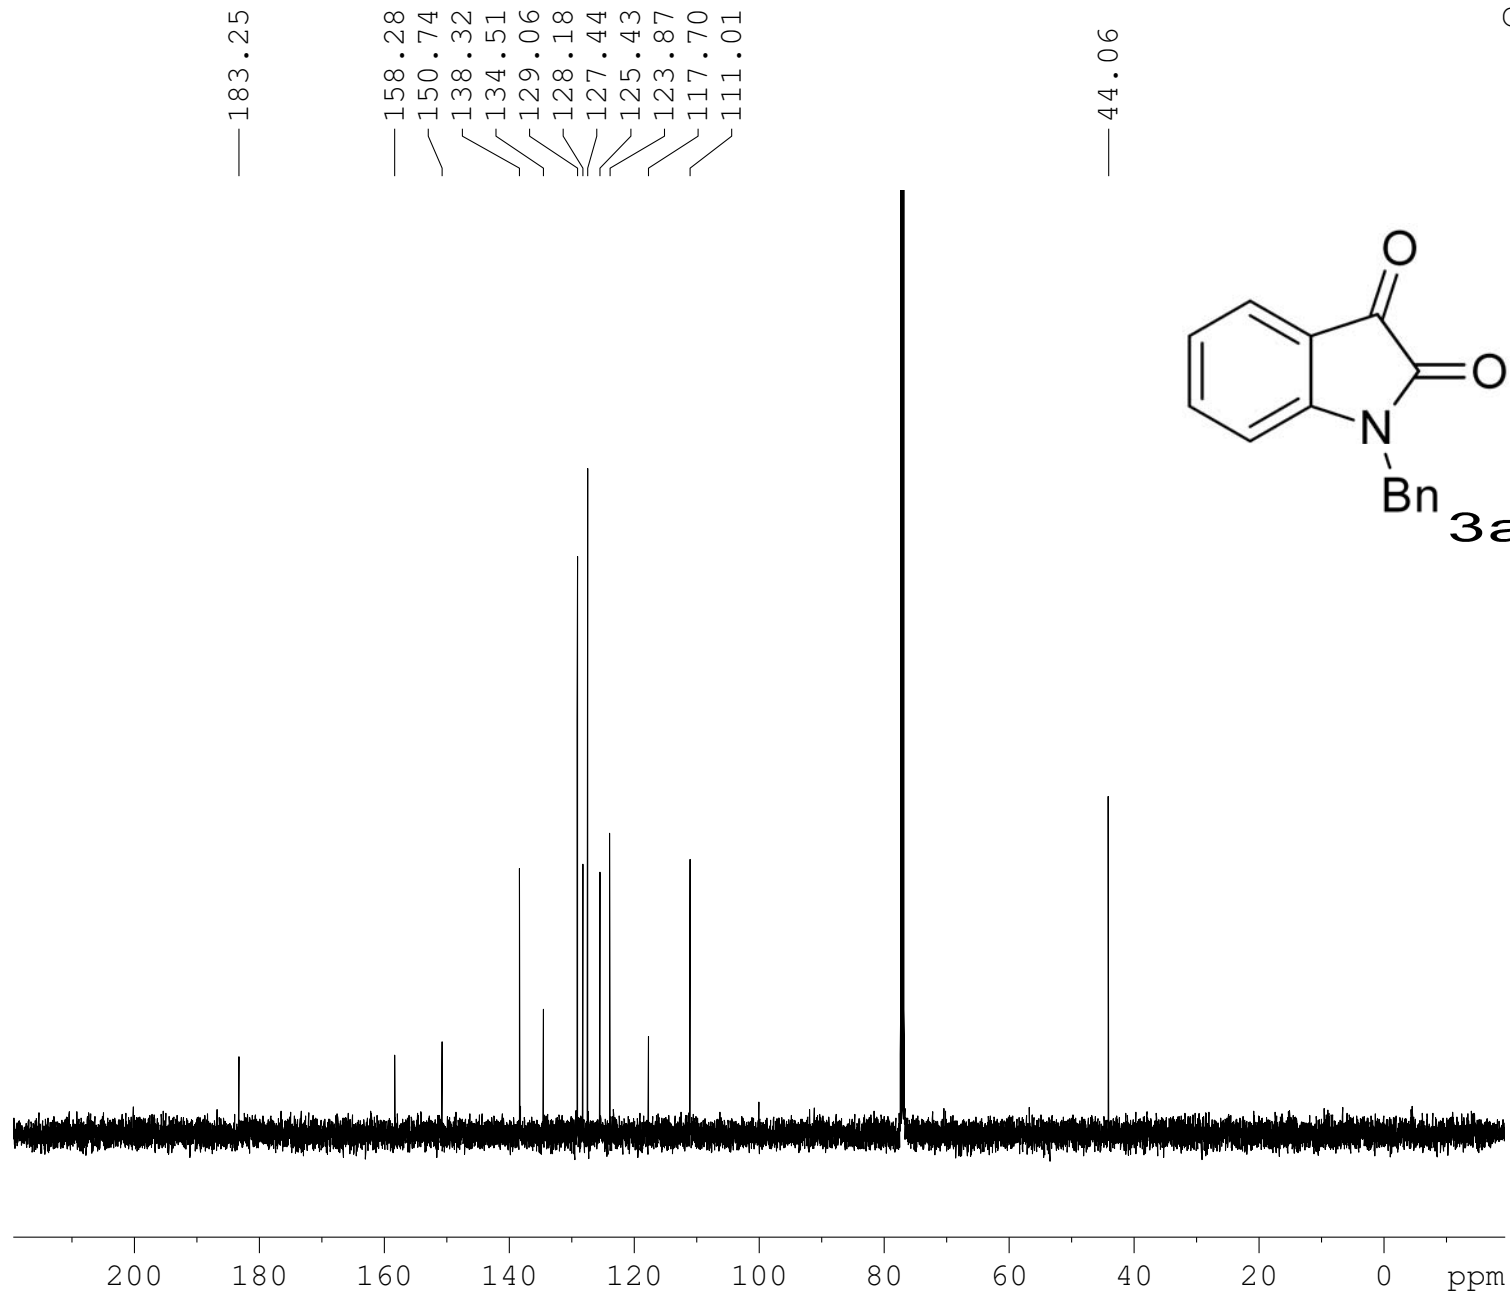

```
NAME sunj1
EXPNO 8
PROCNO 1
Date_ 20110928
Time 17.55
INSTRUM spect
PROBHD 5 mm PATXO 19F
PULPROG zgpg30
TD 65536
SOLVENT CDC13
NS 256
DS 4
SWH 30030.029 Hz
FIDRES 0.458222 Hz
AQ 1.0912410 sec
RG 101.6
DW 16.650 usec
DE 6.00 usec
TE 297.7 K
D1 2.00000000 sec
d11 0.03000000 sec
DELTA 1.89999998 sec
TD0 1
```

```
===== CHANNEL f1 =====
NUC1 13C
P1 9.50 usec
PL1 -0.50 dB
SFO1 125.7703643 MHz
```

```
===== CHANNEL f2 =====
CPDPRG2 waltz16
NUC2 1H
PCPD2 80.00 usec
PL2 2.00 dB
PL12 16.50 dB
PL13 16.50 dB
SFO2 500.1320005 MHz
SI 32768
SF 125.7577890 MHz
WDW EM
SSB 0
LB 1.00 Hz
GB 0
PC 1.40
```

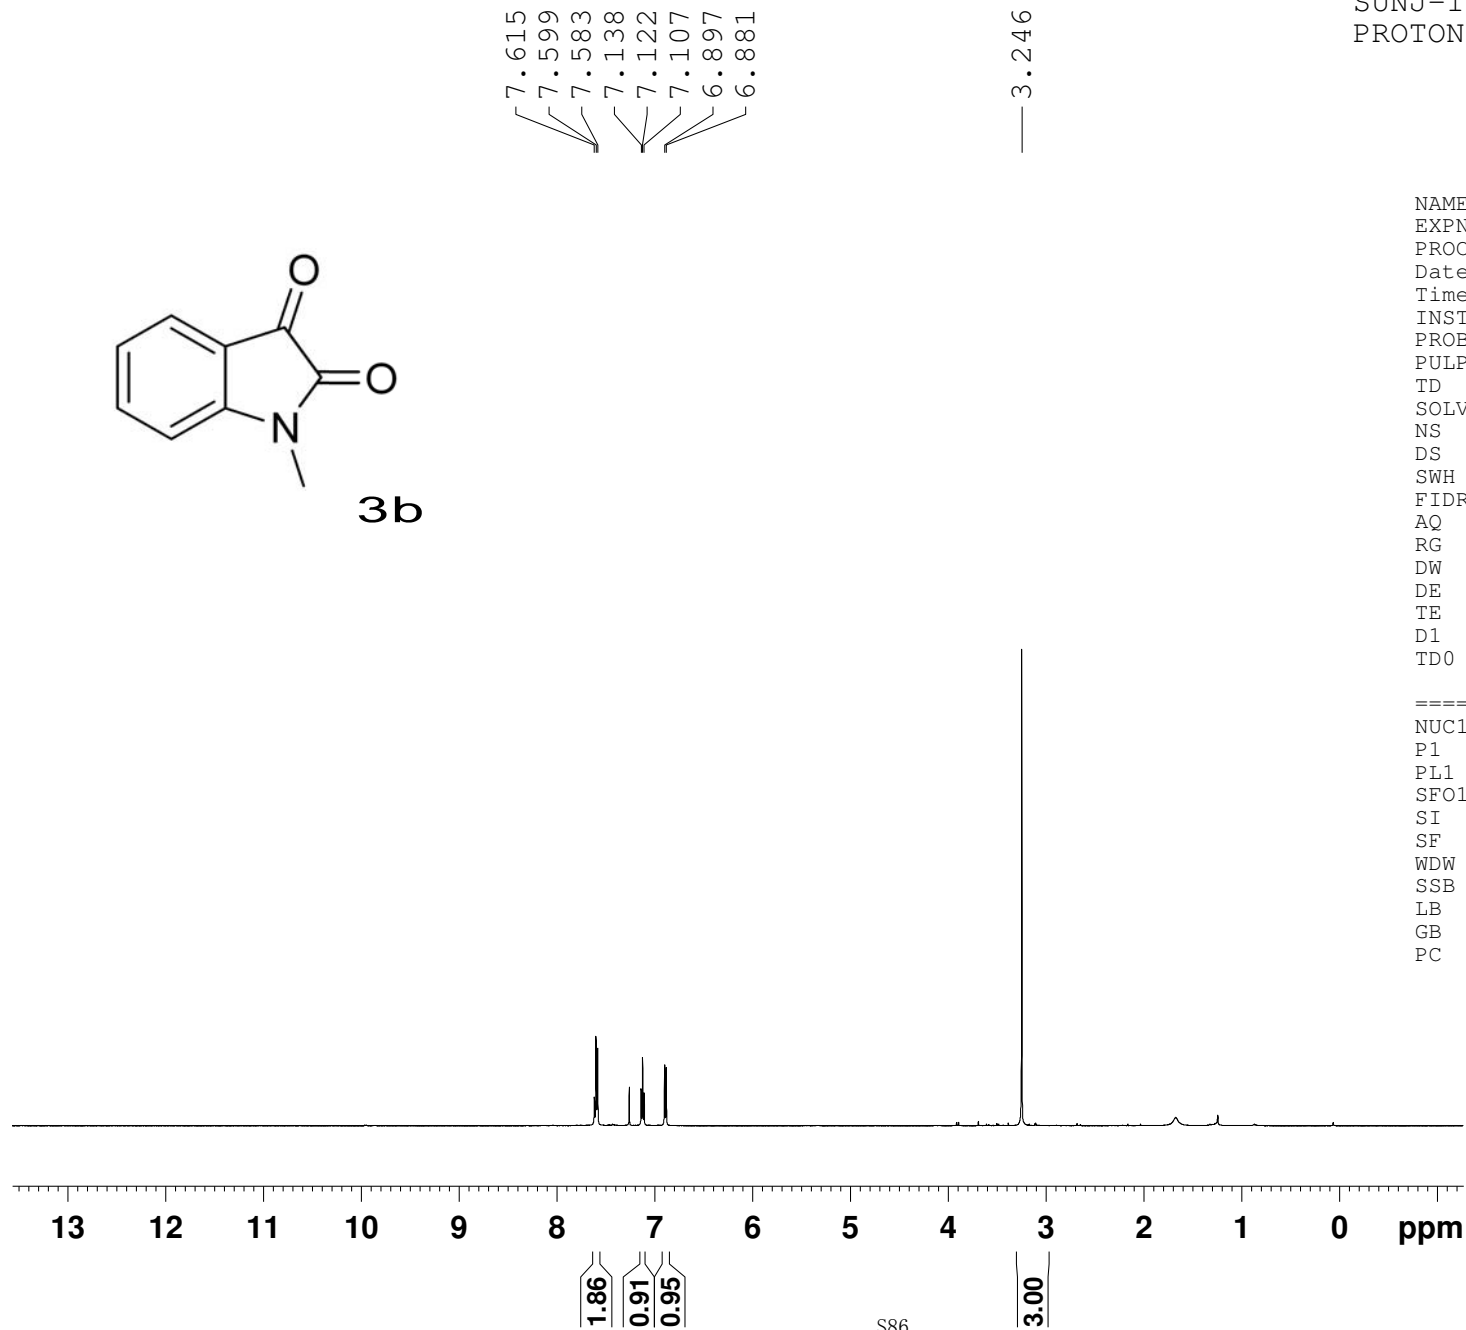

SUNJ-1-254-4  
PROTON CDC13 D:\\ deng 7

NAME xb20110916  
EXPNO 14  
PROCNO 1  
Date\_ 20110916  
Time 18.21  
INSTRUM spect  
PROBHD 5 mm PATXO 19F  
PULPROG zg30  
TD 65536  
SOLVENT CDC13  
NS 16  
DS 2  
SWH 10330.578 Hz  
FIDRES 0.157632 Hz  
AQ 3.1720407 sec  
RG 256  
DW 48.400 usec  
DE 6.00 usec  
TE 297.3 K  
D1 1.00000000 sec  
TD0 1

===== CHANNEL f1 =====  
NUC1 1H  
P1 13.76 usec  
PL1 1.00 dB  
SFO1 500.1330885 MHz  
SI 32768  
SF 500.1300135 MHz  
WDW no  
SSB 0  
LB 0.00 Hz  
GB 0  
PC 1.00

SUNJ-1-254-4  
C13CPD CDC13 D:\\ deng 26

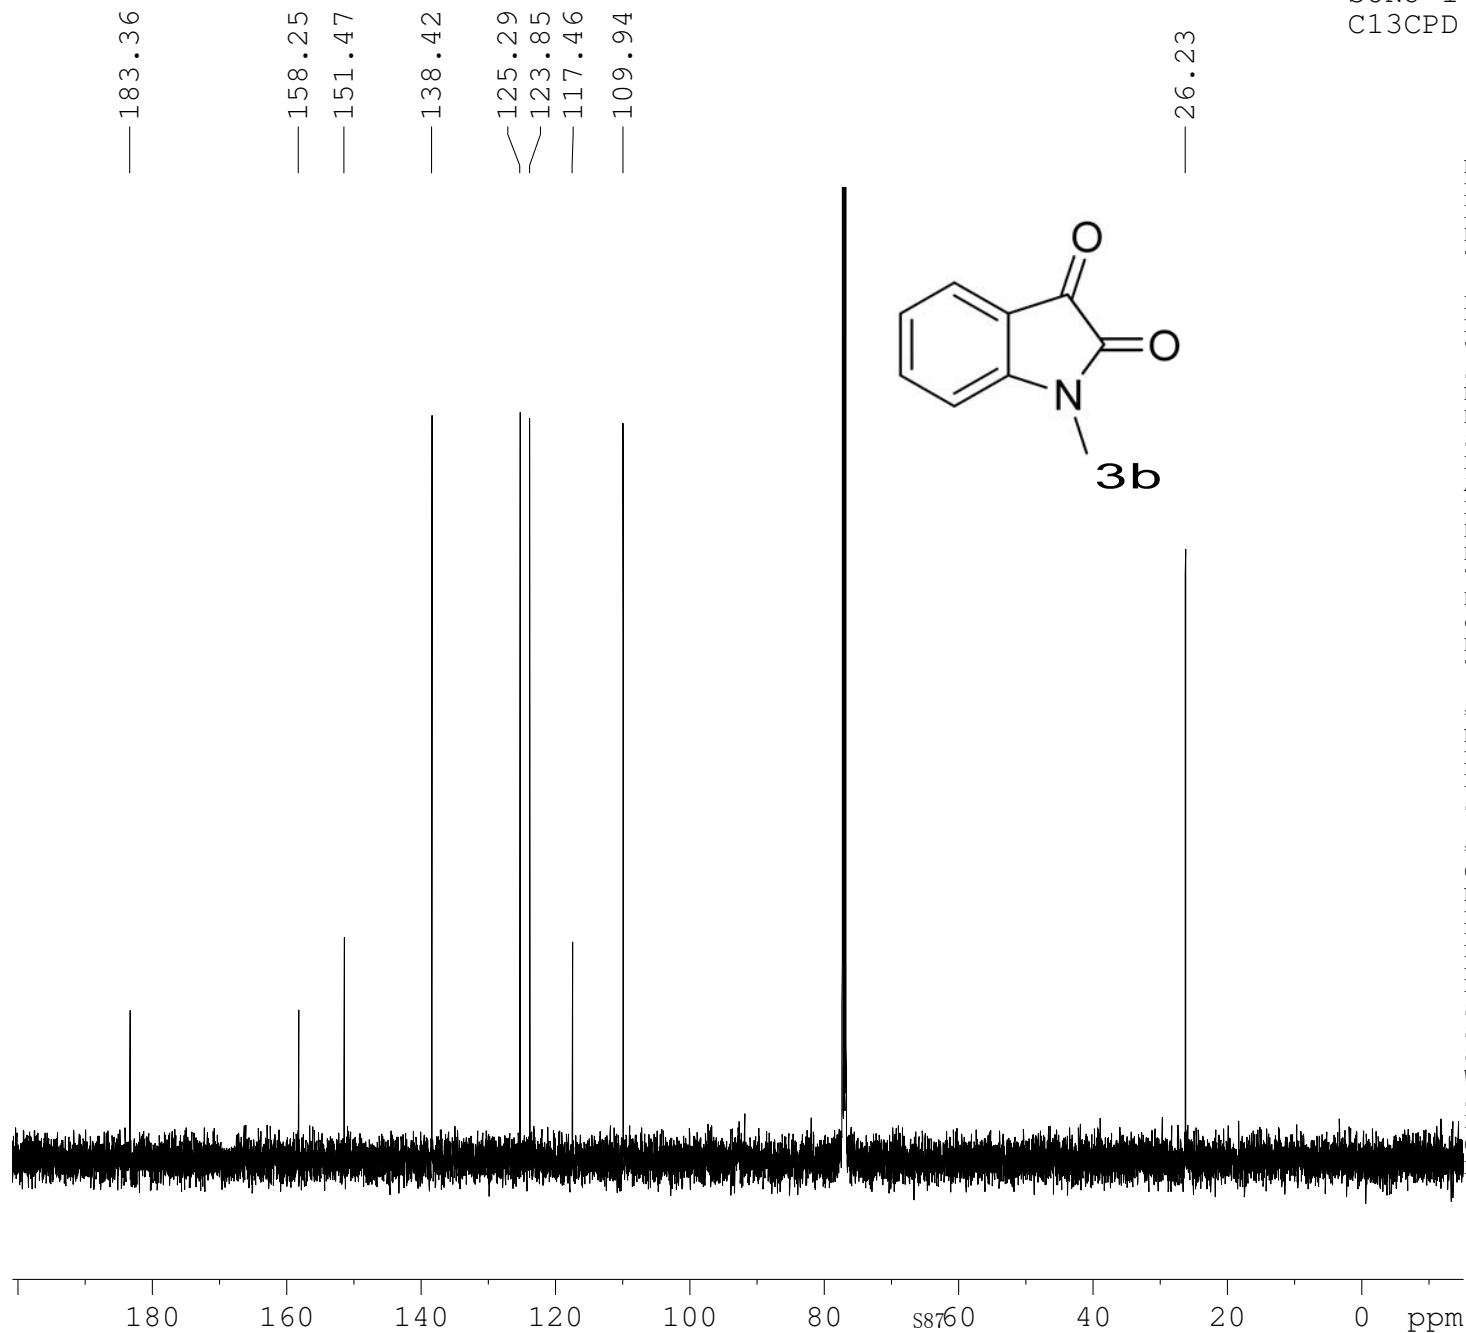

```
NAME          C
EXPNO         25
PROCNO        1
Date_         20110919
Time          18.12
INSTRUM       spect
PROBHD        5 mm PATXO 19F
PULPROG       zgpg30
TD            65536
SOLVENT       CDC13
NS            256
DS            4
SWH           30030.029 Hz
FIDRES        0.458222 Hz
AQ            1.0912410 sec
RG            101.6
DW            16.650 usec
DE            6.00 usec
TE            298.4 K
D1            2.00000000 sec
d11           0.03000000 sec
DELTA         1.89999998 sec
TD0           1
```

```
===== CHANNEL f1 =====
NUC1          13C
P1            9.50 usec
PL1           -0.50 dB
SFO1          125.7703643 MHz
```

```
===== CHANNEL f2 =====
CPDPRG2       waltz16
NUC2          1H
PCPD2         80.00 usec
PL2           2.00 dB
PL12          16.50 dB
PL13          16.50 dB
SFO2          500.1320005 MHz
SI            32768
SF            125.7577890 MHz
WDW           EM
SSB           0
LB            1.00 Hz
GB            0
PC            1.40
```

SunJ-1-282-2  
PROTON CDC13 D:\ deng 48

7.590  
7.574  
7.559  
7.556  
7.112  
7.097  
7.082  
6.902  
6.886

3.695  
3.680  
3.666

1.752  
1.737  
1.723  
1.708  
0.999  
0.985  
0.970

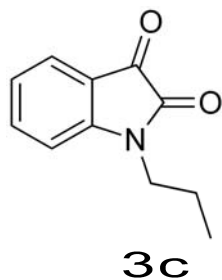

```
NAME          xb20110926
EXPNO          4
PROCNO         1
Date_          20110926
Time           9.02
INSTRUM        spect
PROBHD         5 mm PATXO 19F
PULPROG        zg30
TD             65536
SOLVENT        CDC13
NS             16
DS             2
SWH            10330.578 Hz
FIDRES         0.157632 Hz
AQ             3.1720407 sec
RG             181
DW             48.400 usec
DE             6.00 usec
TE             294.3 K
D1             1.00000000 sec
TD0            1
```

```
===== CHANNEL f1 =====
NUC1           1H
P1             13.76 usec
PL1            1.00 dB
SFO1           500.1330885 MHz
SI             32768
SF             500.1300125 MHz
WDW            no
SSB            0
LB             0.00 Hz
GB             0
PC             1.00
```

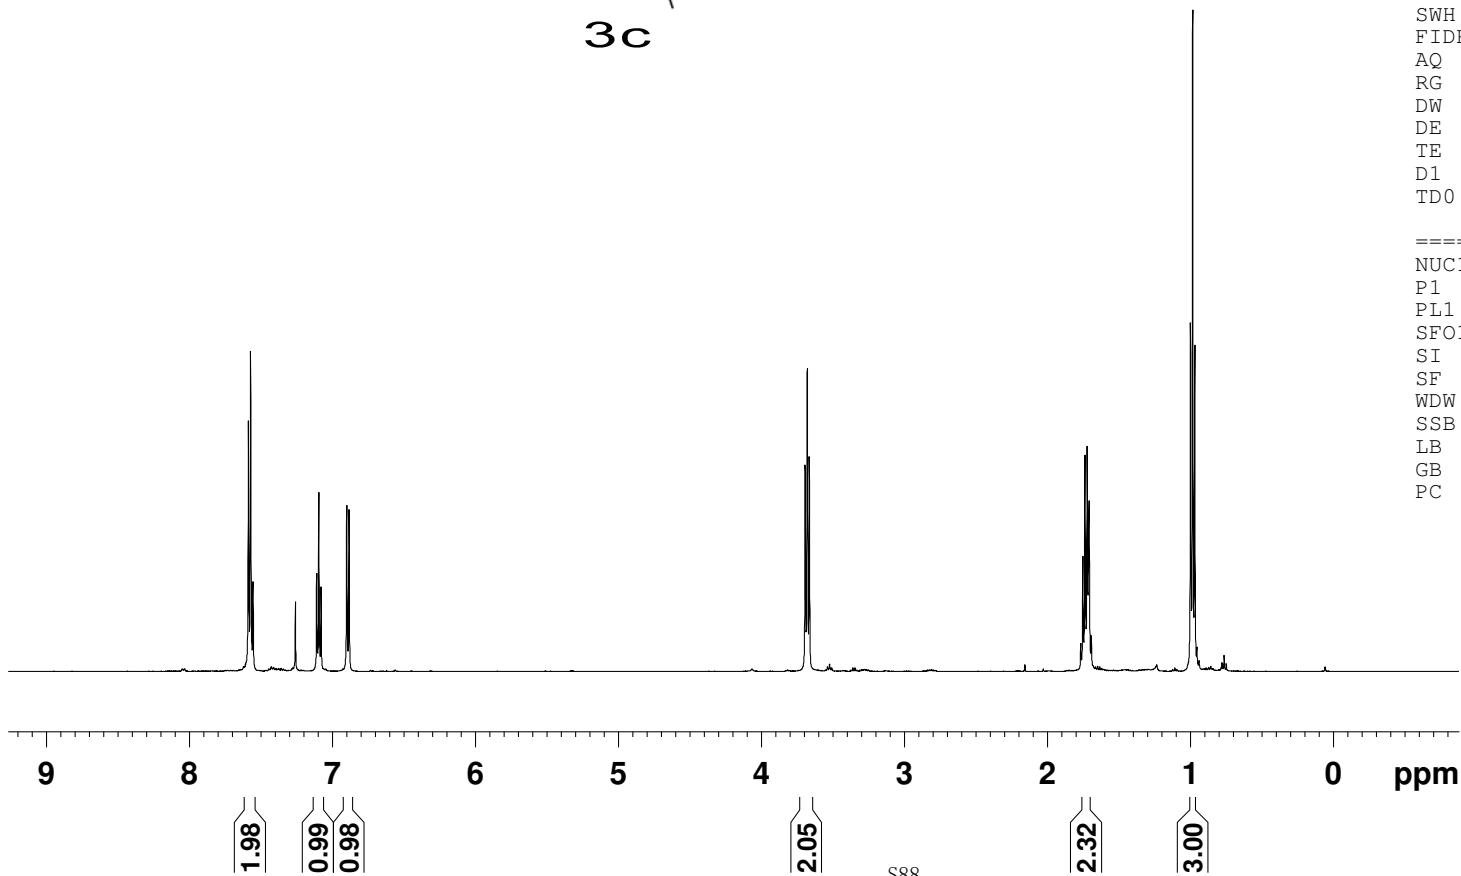



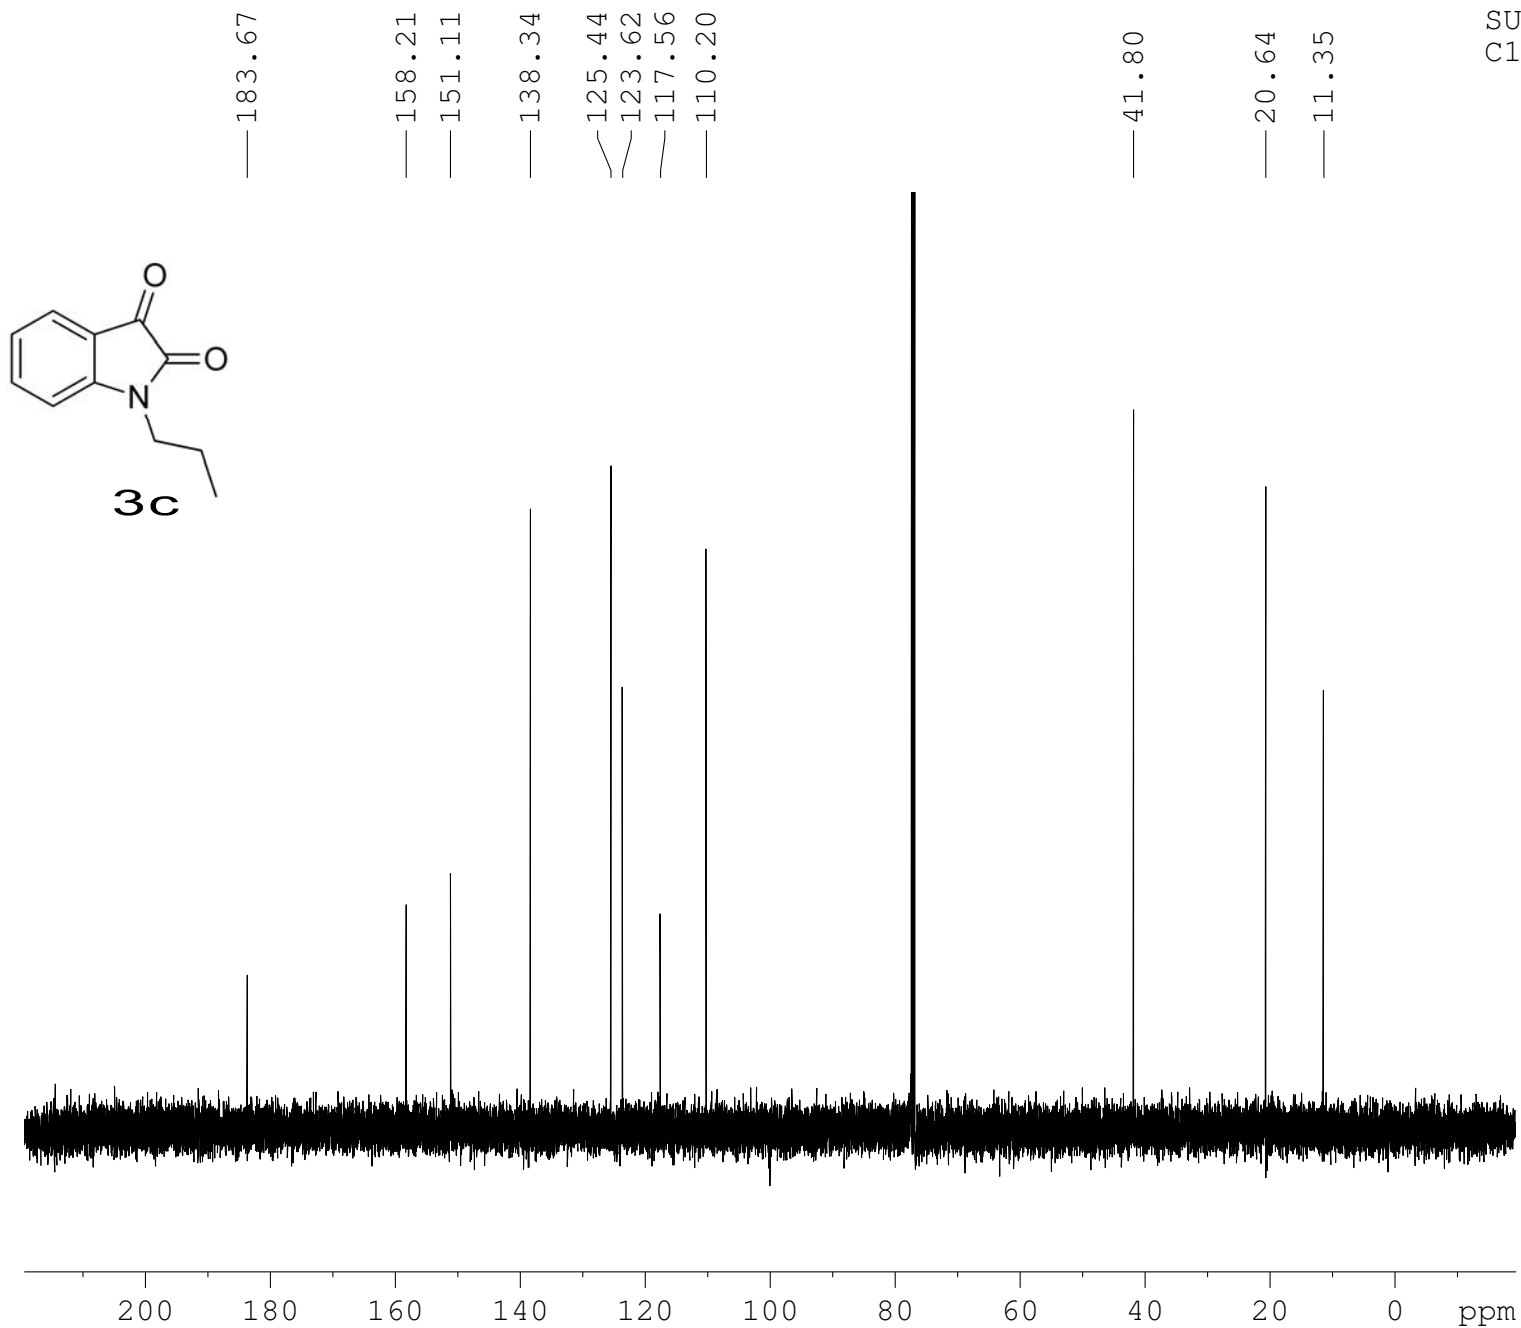

SUNJ-1-282-2  
C13CPD CDC13 D:\\ deng 12

```
NAME          xb20110926
EXPNO          9
PROCNO         1
Date_          20110926
Time           11.29
INSTRUM        spect
PROBHD         5 mm PATXO 19F
PULPROG        zgpg30
TD             65536
SOLVENT        CDC13
NS             128
DS             4
SWH            30030.029 Hz
FIDRES         0.458222 Hz
AQ            1.0912410 sec
RG            114
DW            16.650 usec
DE            6.00 usec
TE            296.8 K
D1            2.0000000 sec
d11           0.0300000 sec
DELTA         1.89999998 sec
TD0           1
```

==== CHANNEL f1 =====

```
NUC1           13C
P1             9.50 usec
PL1           -0.50 dB
SFO1          125.7703643 MHz
```

==== CHANNEL f2 =====

```
CPDPRG2        waltz16
NUC2           1H
PCPD2          80.00 usec
PL2            2.00 dB
PL12           16.50 dB
PL13           16.50 dB
SFO2          500.1320005 MHz
SI             32768
SF            125.7577890 MHz
WDW            no
SSB            0
LB             0.00 Hz
GB            0
PC             1.40
```

SunJ-1-288-2  
 PROTON CDC13 D:\ deng 33

7.581  
 7.578  
 7.568  
 7.566  
 7.555  
 7.105  
 7.090  
 7.075  
 6.896  
 6.880

3.718  
 3.704  
 3.689

1.698  
 1.683  
 1.668  
 1.653  
 1.638  
 1.432  
 1.417  
 1.402  
 1.386  
 1.372  
 1.357  
 0.965  
 0.950  
 0.936

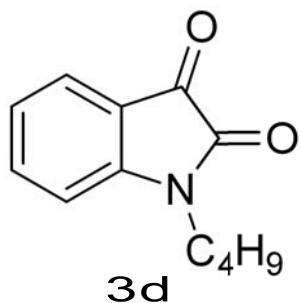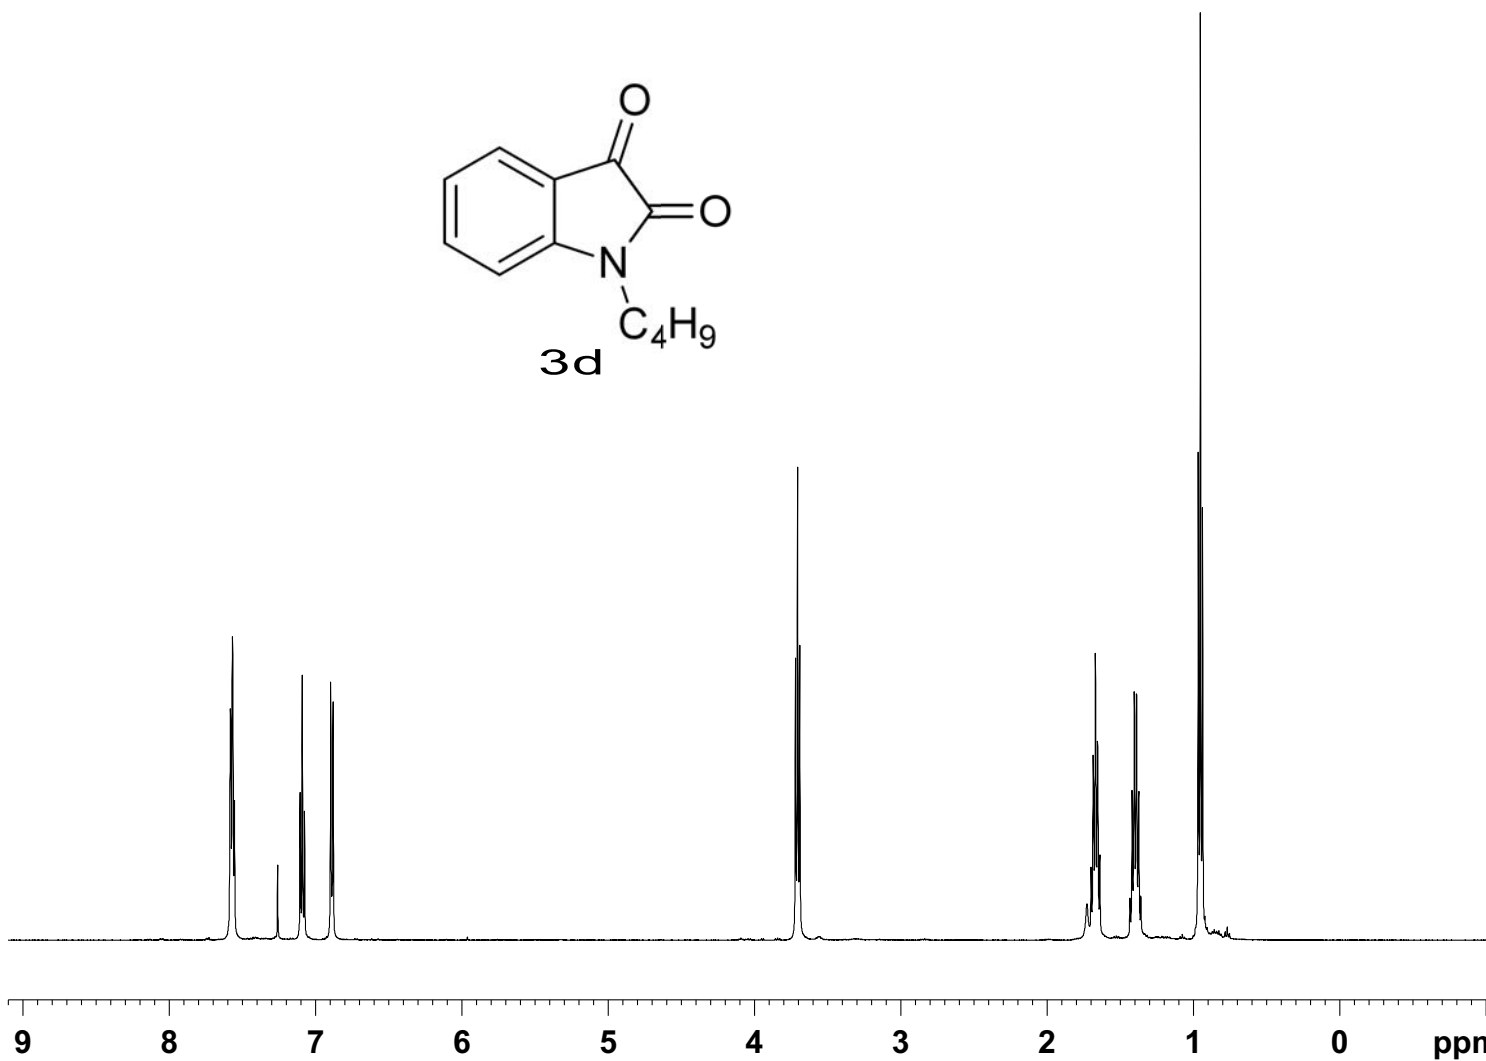

1.84  
 0.93  
 0.92

2.02

2.19  
 2.02  
 3.00

```

NAME          xb20110928
EXPNO         21
PROCNO        1
Date_         20110928
Time_         9.07
INSTRUM       spect
PROBHD        5 mm PATXO 19F
PULPROG       zg30
TD            65536
SOLVENT       CDC13
NS            16
DS            2
SWH           10330.578 Hz
FIDRES        0.157632 Hz
AQ            3.1720407 sec
RG            143.7
DW            48.400 usec
DE            6.00 usec
TE            295.8 K
D1            1.00000000 sec
TD0           1

===== CHANNEL f1 =====
NUC1          1H
P1            13.76 usec
PL1           1.00 dB
SFO1          500.1330885 MHz
SI            32768
SF            500.1300136 MHz
WDW           no
SSB           0
LB            0.00 Hz
GB            0
PC            1.00
    
```

SunJ-1-288-C  
C13CPD CDCl3 D:\ deng 12

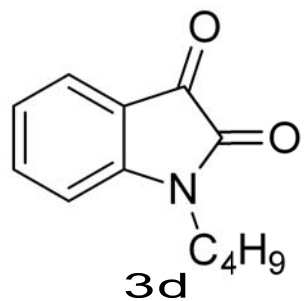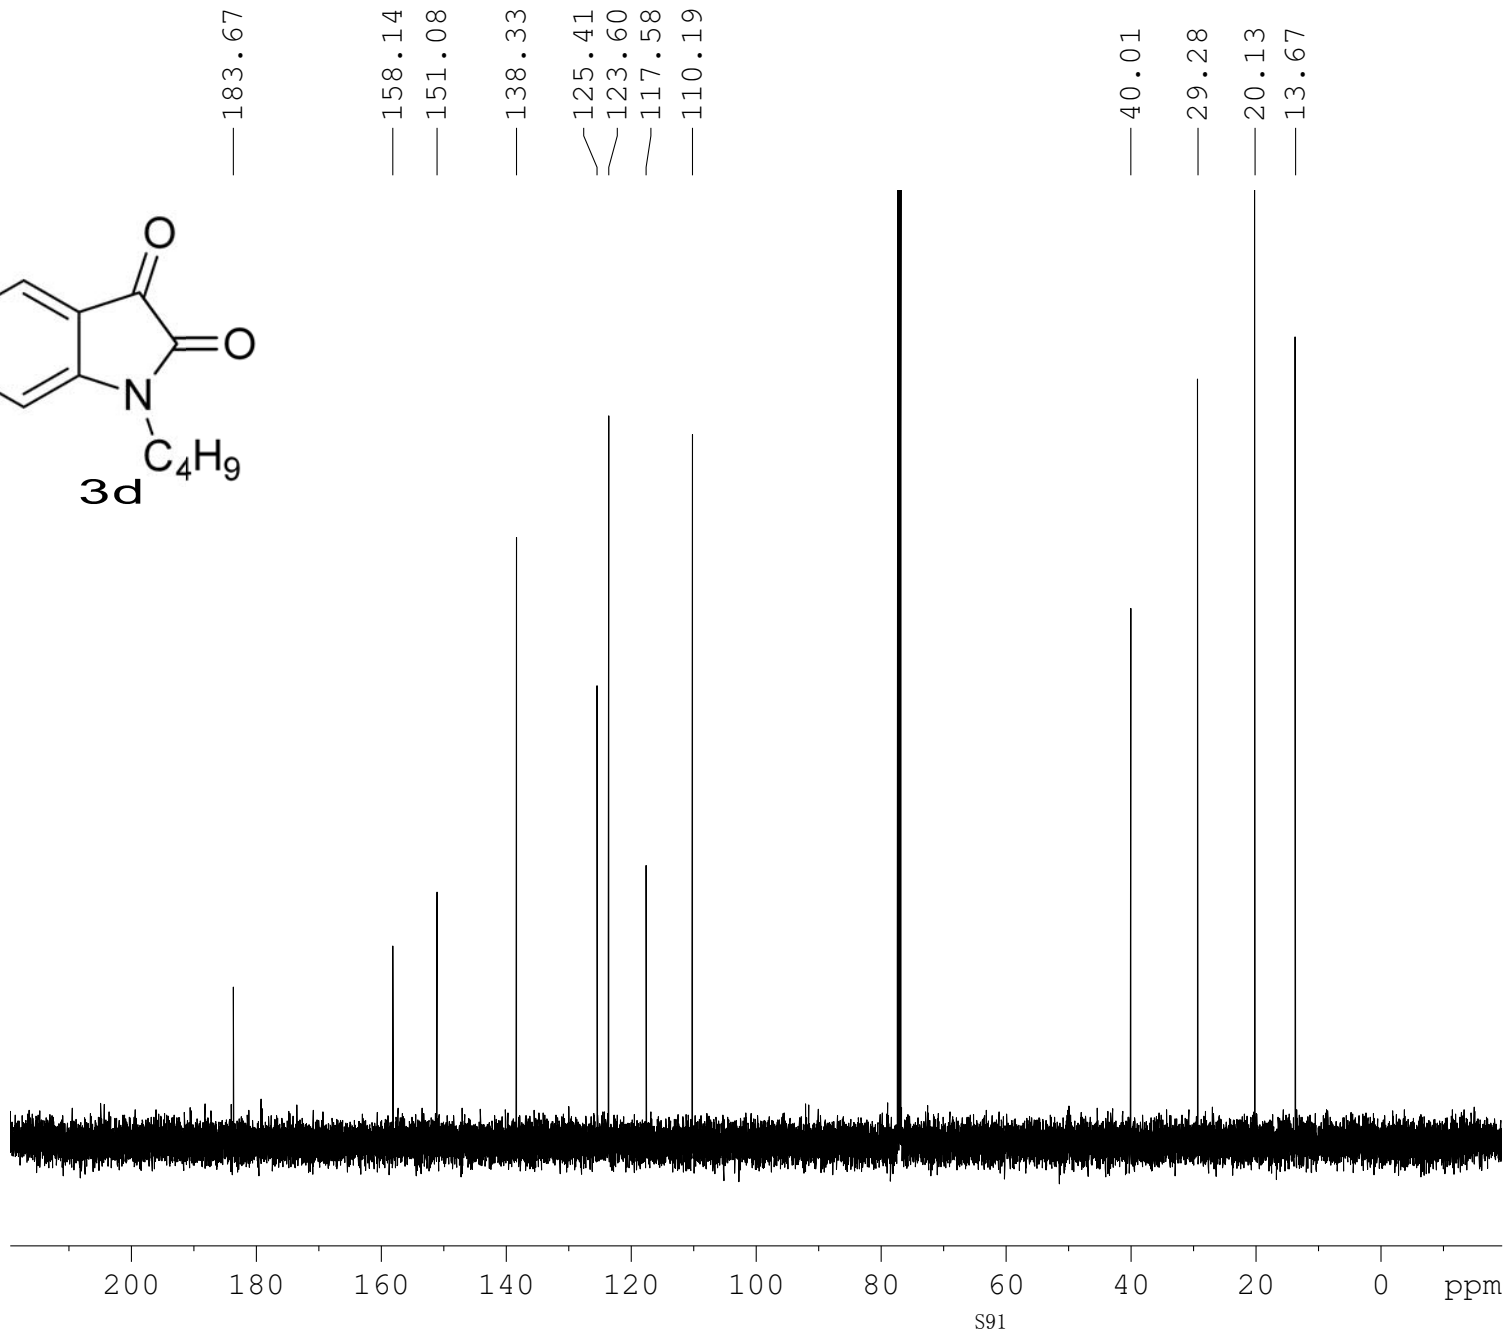

```
NAME          xb20110928
EXPNO          6
PROCNO         1
Date_          20110928
Time           13.56
INSTRUM        spect
PROBHD         5 mm PATXO 19F
PULPROG        zgpg30
TD             65536
SOLVENT        CDCl3
NS             136
DS             4
SWH            30030.029 Hz
FIDRES         0.458222 Hz
AQ            1.0912410 sec
RG            114
DW            16.650 usec
DE            6.00 usec
TE            297.5 K
D1            2.00000000 sec
d11           0.03000000 sec
DELTA         1.89999998 sec
TD0           1
```

```
===== CHANNEL f1 =====
NUC1          13C
P1            9.50 usec
PL1           -0.50 dB
SFO1          125.7703643 MHz
```

```
===== CHANNEL f2 =====
CPDPRG2       waltz16
NUC2          1H
PCPD2         80.00 usec
PL2           2.00 dB
PL12          16.50 dB
PL13          16.50 dB
SFO2          500.1320005 MHz
SI            32768
SF            125.7577890 MHz
WDW           no
SSB           0
LB            0.00 Hz
GB            0
PC            1.40
```

SUNJ-1-276-3  
 PROTON CDC13 D:\\ deng 38

7.590  
 7.588  
 7.581  
 7.574  
 7.572  
 7.559  
 7.557  
 7.113  
 7.098  
 7.083  
 6.893  
 6.877

3.716  
 3.701  
 3.687

1.699  
 1.685  
 1.670  
 1.655  
 1.346  
 1.337  
 1.323  
 1.306  
 1.296  
 1.282  
 1.267  
 1.239  
 0.879  
 0.866  
 0.852

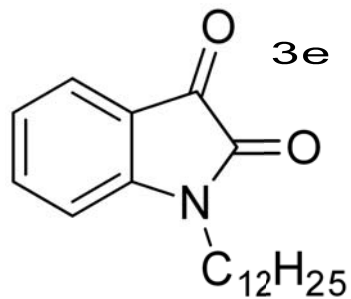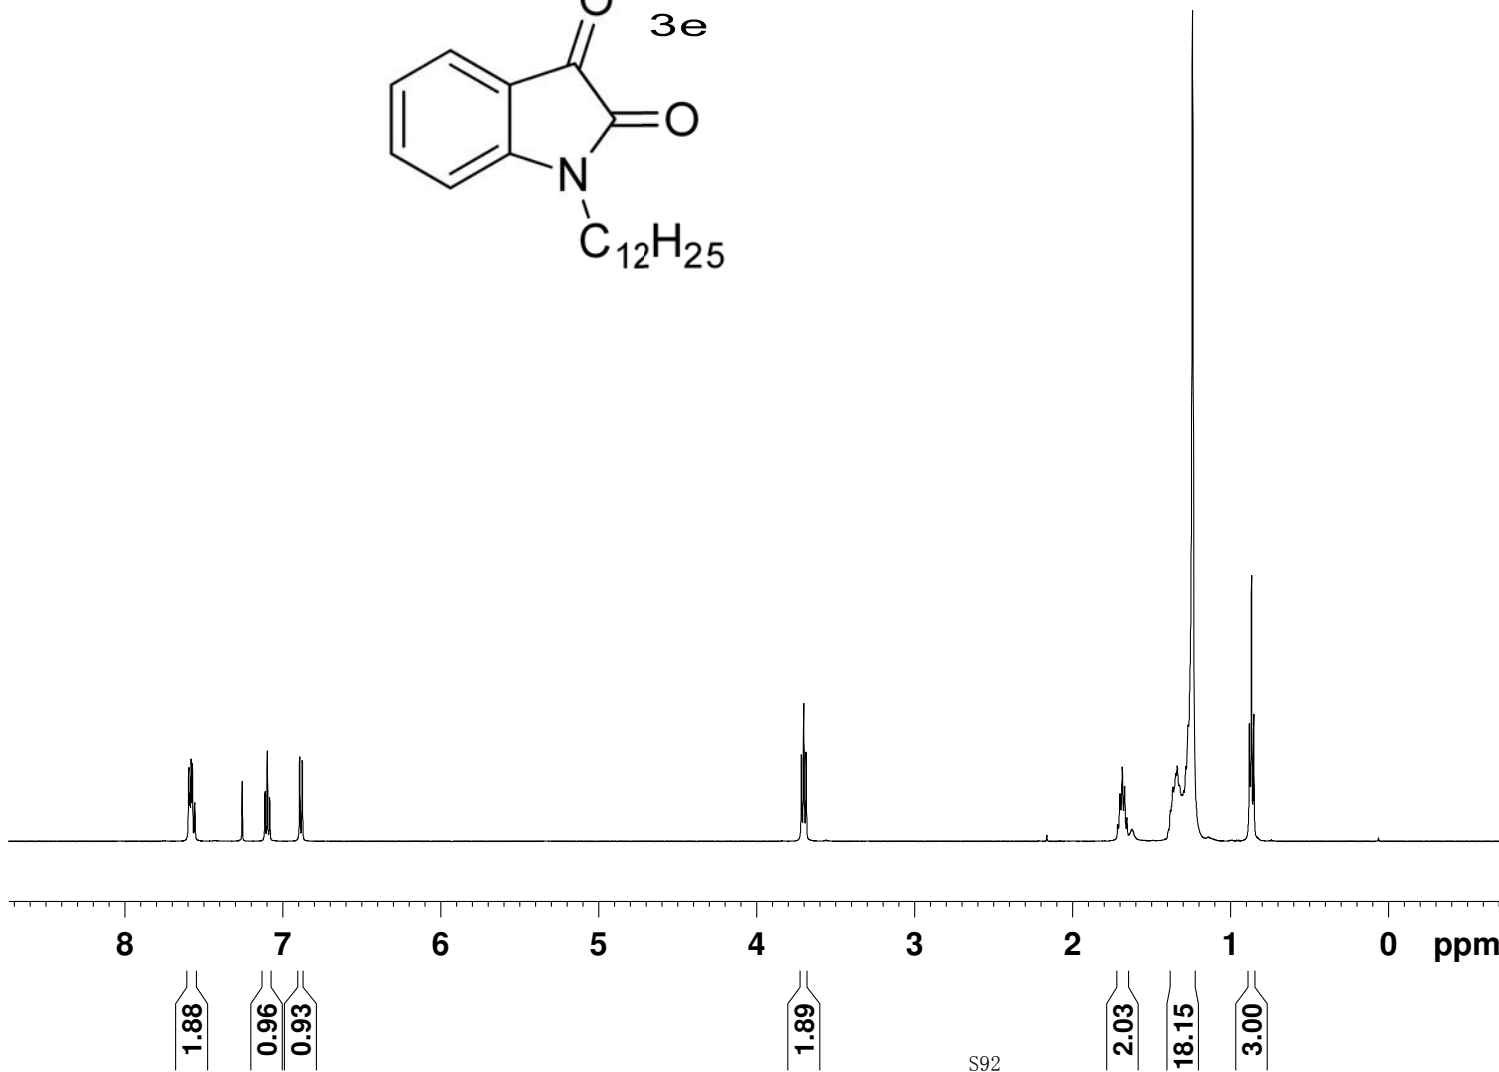

NAME SUNJ  
 EXPNO 12  
 PROCNO 1  
 Date\_ 20110923  
 Time 18.08  
 INSTRUM spect  
 PROBHD 5 mm PATXO 19F  
 PULPROG zg30  
 TD 65536  
 SOLVENT CDC13  
 NS 16  
 DS 2  
 SWH 10330.578 Hz  
 FIDRES 0.157632 Hz  
 AQ 3.1720407 sec  
 RG 161.3  
 DW 48.400 usec  
 DE 6.00 usec  
 TE 296.7 K  
 D1 1.00000000 sec  
 TD0 1

==== CHANNEL f1 =====  
 NUC1 1H  
 P1 13.76 usec  
 PL1 1.00 dB  
 SFO1 500.1330885 MHz  
 SI 32768  
 SF 500.1300144 MHz  
 WDW no  
 SSB 0  
 LB 0.00 Hz  
 GB 0  
 PC 1.00

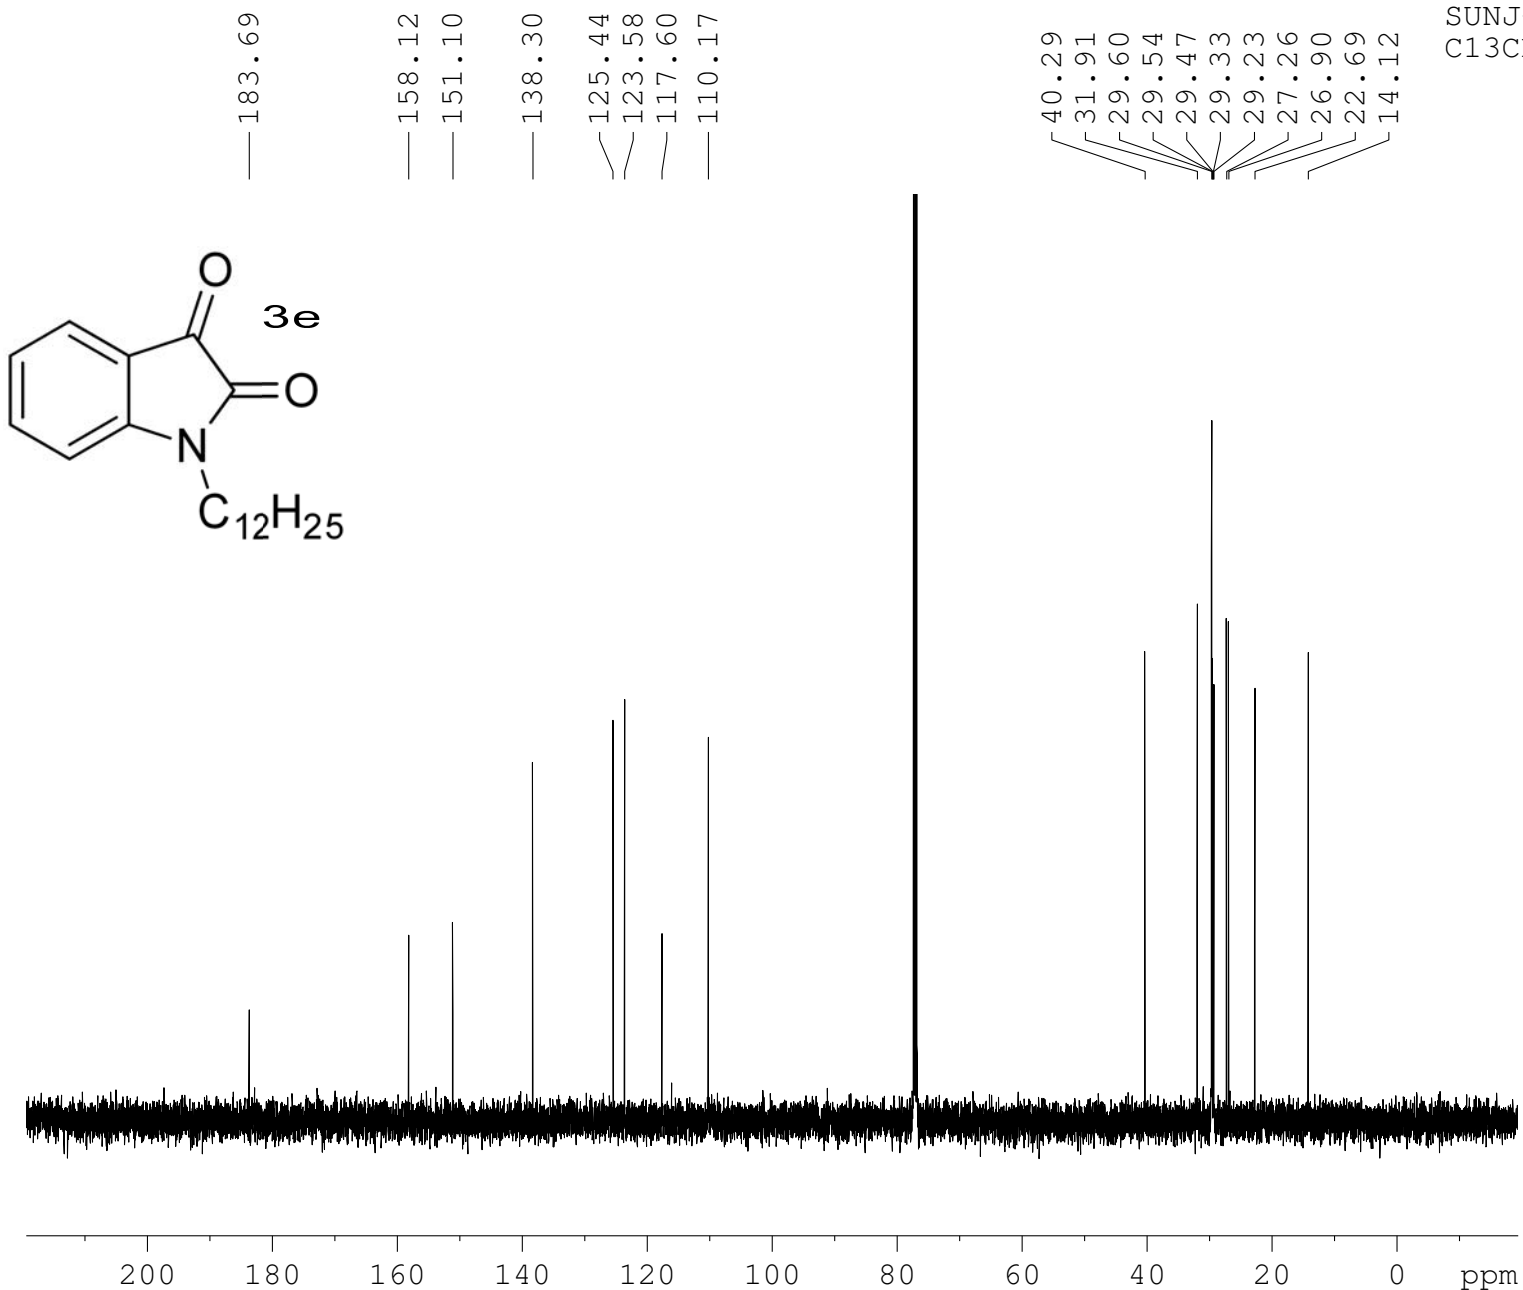

SUNJ-1-276-3  
C13CPD CDC13 D:\\ deng 22

NAME XB20110927  
EXPNO 7  
PROCNO 1  
Date\_ 20110927  
Time 8.52  
INSTRUM spect  
PROBHD 5 mm PATXO 19F  
PULPROG zgpg30  
TD 65536  
SOLVENT CDC13  
NS 128  
DS 4  
SWH 30030.029 Hz  
FIDRES 0.458222 Hz  
AQ 1.0912410 sec  
RG 114  
DW 16.650 usec  
DE 6.00 usec  
TE 296.8 K  
D1 2.00000000 sec  
d11 0.03000000 sec  
DELTA 1.89999998 sec  
TD0 1

==== CHANNEL f1 =====  
NUC1 13C  
P1 9.50 usec  
PL1 -0.50 dB  
SFO1 125.7703643 MHz

==== CHANNEL f2 =====  
CPDPRG2 waltz16  
NUC2 1H  
PCPD2 80.00 usec  
PL2 2.00 dB  
PL12 16.50 dB  
PL13 16.50 dB  
SFO2 500.1320005 MHz  
SI 32768  
SF 125.7577890 MHz  
WDW EM  
SSB 0  
LB 1.00 Hz  
GB 0  
PC 1.40

SunJ-1-276  
PROTON CDC13 D:\ deng 45

7.588  
7.572  
7.569  
7.556  
7.554  
7.540  
7.538  
7.099  
7.084  
7.069  
7.033  
7.017

4.559  
4.545  
4.531  
4.517  
4.503

1.519  
1.505

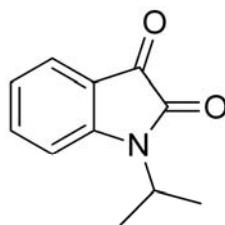

**3f**

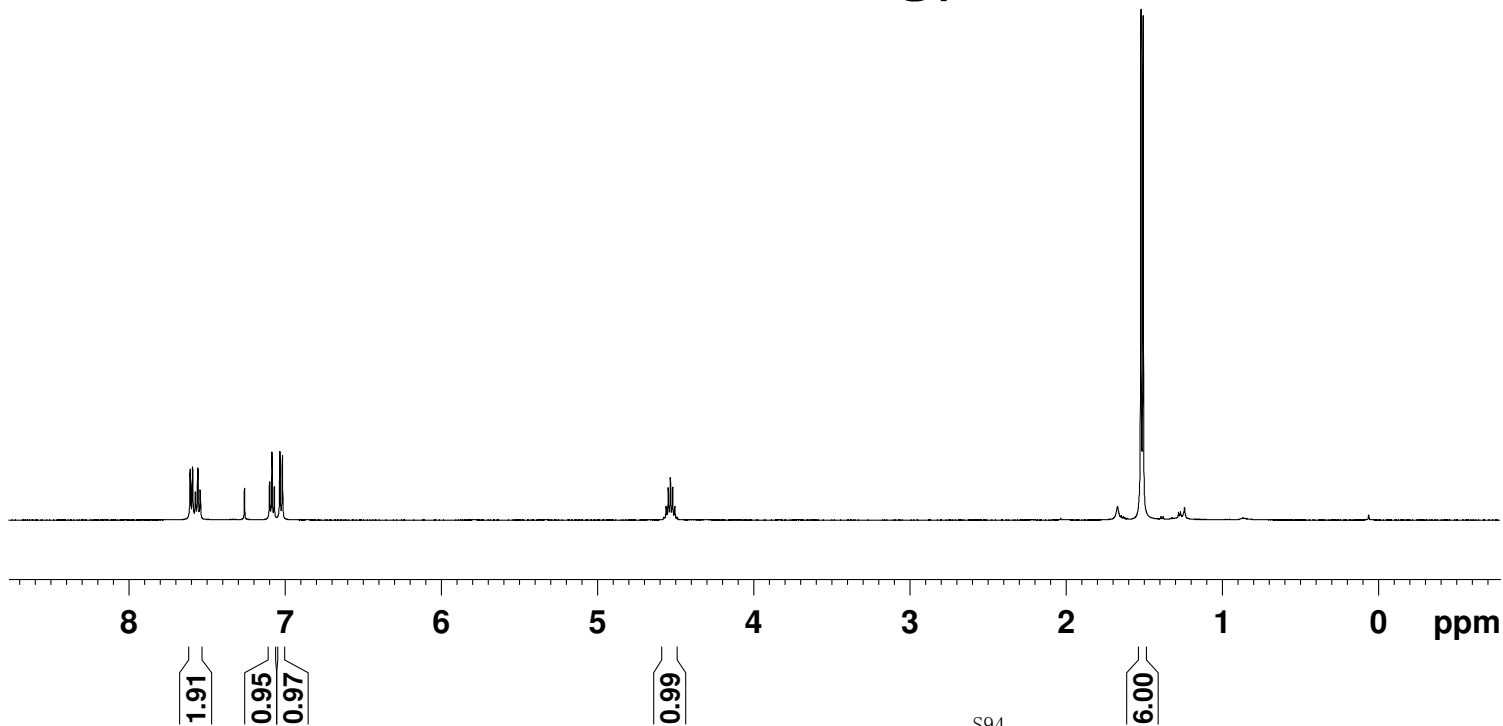

```
NAME          xb20110926
EXPNO          1
PROCNO         1
Date_          20110926
Time           8.45
INSTRUM        spect
PROBHD         5 mm PATXO 19F
PULPROG        zg30
TD             65536
SOLVENT        CDCl3
NS             16
DS             2
SWH            10330.578 Hz
FIDRES         0.157632 Hz
AQ             3.1720407 sec
RG             203.2
DW             48.400 usec
DE             6.00 usec
TE             294.2 K
D1             1.00000000 sec
TD0            1
```

```
===== CHANNEL f1 =====
NUC1           1H
P1             13.76 usec
PL1            1.00 dB
SFO1           500.1330885 MHz
SI             32768
SF             500.1300133 MHz
WDW            no
SSB            0
LB             0.00 Hz
GB             0
PC             1.00
```

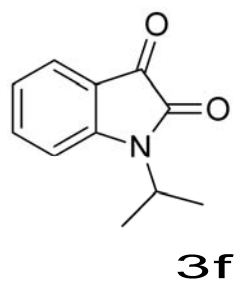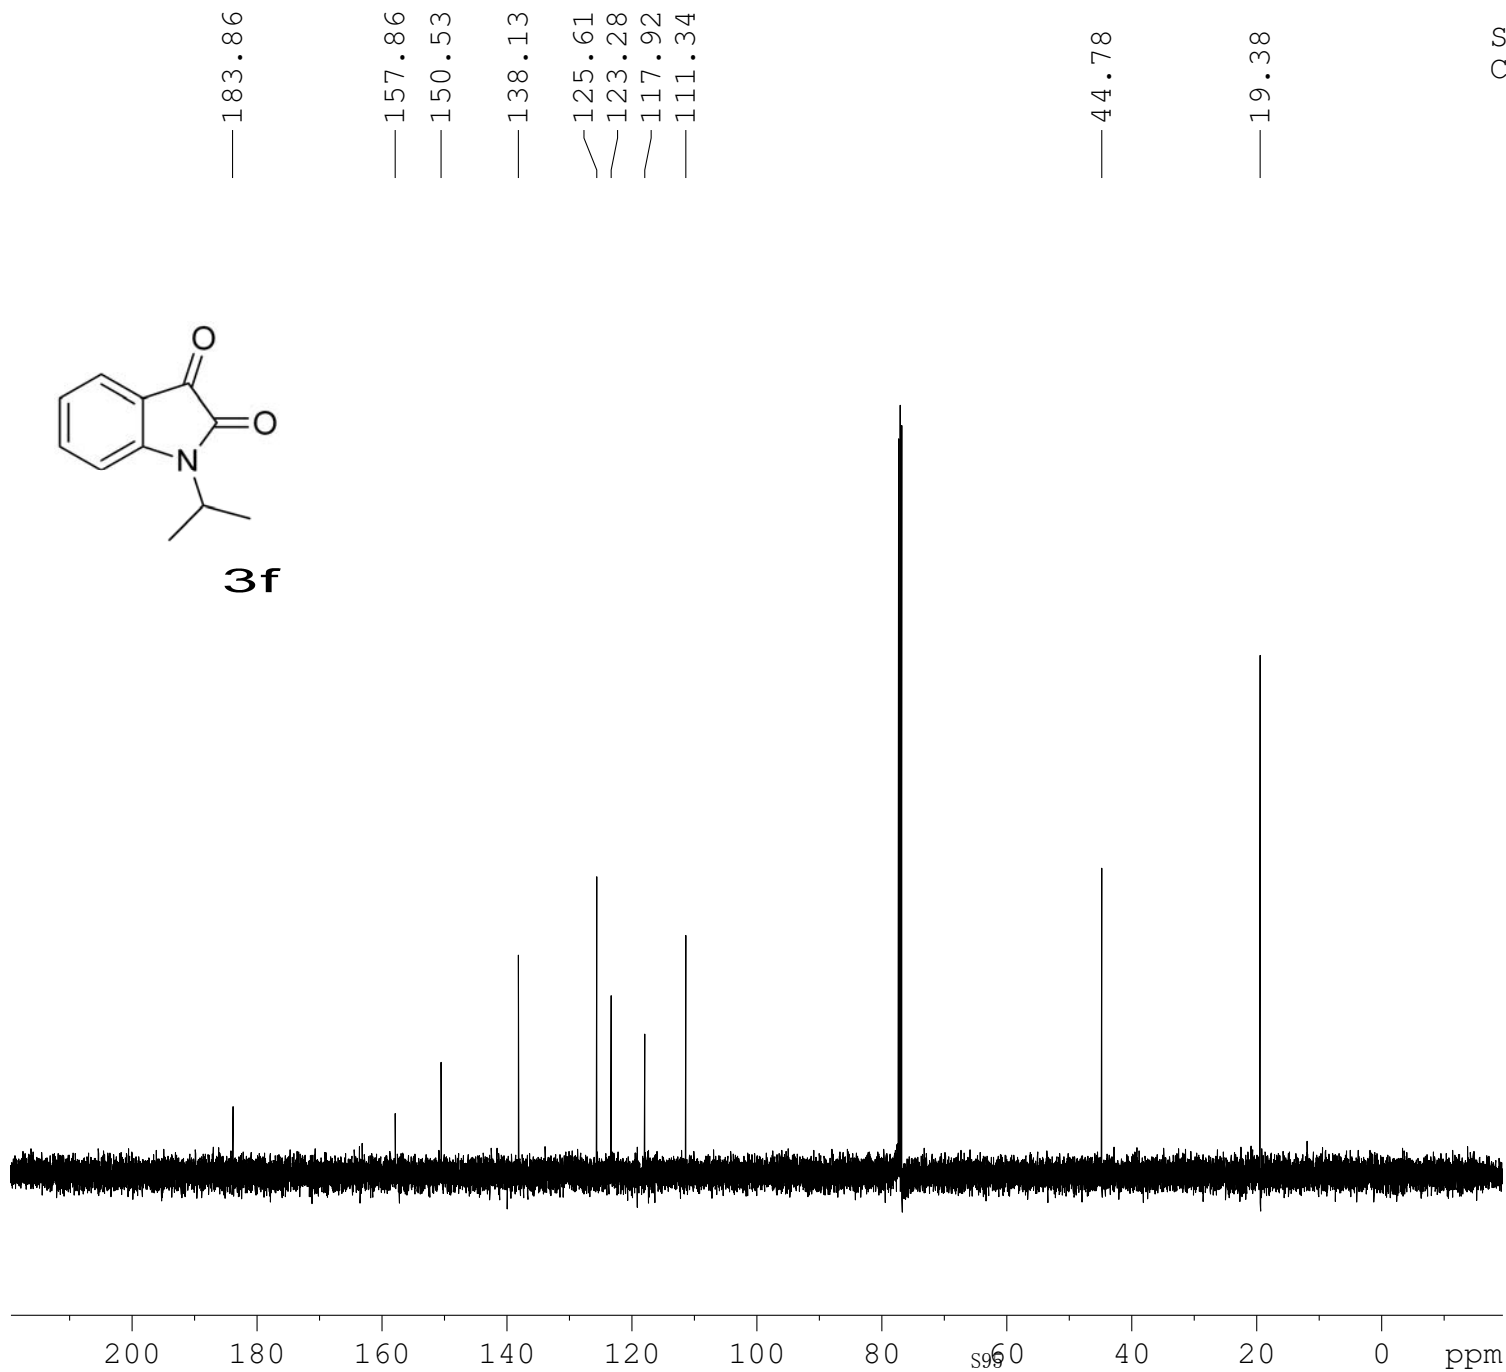

SUNJ-1-276-2  
C13CPD CDC13 D:\\ deng 11

```
NAME          xb20110926
EXPNO          8
PROCNO         1
Date_          20110926
Time           11.17
INSTRUM        spect
PROBHD         5 mm PATXO 19F
PULPROG        zgpg30
TD             65536
SOLVENT        CDC13
NS             128
DS             4
SWH            30030.029 Hz
FIDRES         0.458222 Hz
AQ             1.0912410 sec
RG             143.7
DW             16.650 usec
DE             6.00 usec
TE             296.6 K
D1             2.00000000 sec
d11            0.03000000 sec
DELTA          1.89999999 sec
TD0            1
```

```
===== CHANNEL f1 =====
NUC1           13C
P1             9.50 usec
PL1            -0.50 dB
SFO1           125.7703643 MHz
```

```
===== CHANNEL f2 =====
CPDPRG2        waltz16
NUC2           1H
PCPD2          80.00 usec
PL2            2.00 dB
PL12           16.50 dB
PL13           16.50 dB
SFO2           500.1320005 MHz
SI             32768
SF             125.7577890 MHz
WDW            no
SSB            0
LB             0.00 Hz
GB             0
PC             1.40
```

SUNJ-2-144-1  
PROTON CDC13 D:\\ deng 21

7.622  
7.607  
7.591  
7.585  
7.571  
7.570  
7.191  
7.175  
7.136  
7.122  
7.106

2.700  
2.692  
2.686  
2.679  
2.671  
2.665  
2.657  
1.138  
1.123  
1.112  
1.098  
0.970  
0.959  
0.955  
0.952  
0.948  
0.936

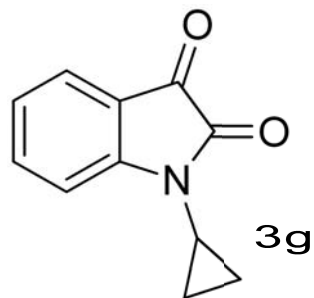

NAME xb20120312  
EXPNO 3  
PROCNO 1  
Date\_ 20120312  
Time 9.44  
INSTRUM spect  
PROBHD 5 mm PATXO 19F  
PULPROG zg30  
TD 65536  
SOLVENT CDC13  
NS 8  
DS 2  
SWH 10330.578 Hz  
FIDRES 0.157632 Hz  
AQ 3.1720407 sec  
RG 362  
DW 48.400 usec  
DE 6.00 usec  
TE 293.5 K  
D1 1.00000000 sec  
TD0 1

==== CHANNEL f1 =====  
NUC1 1H  
P1 13.70 usec  
PL1 1.00 dB  
SFO1 500.1330885 MHz  
SI 32768  
SF 500.1300147 MHz  
WDW no  
SSB 0  
LB 0.00 Hz  
GB 0  
PC 1.00

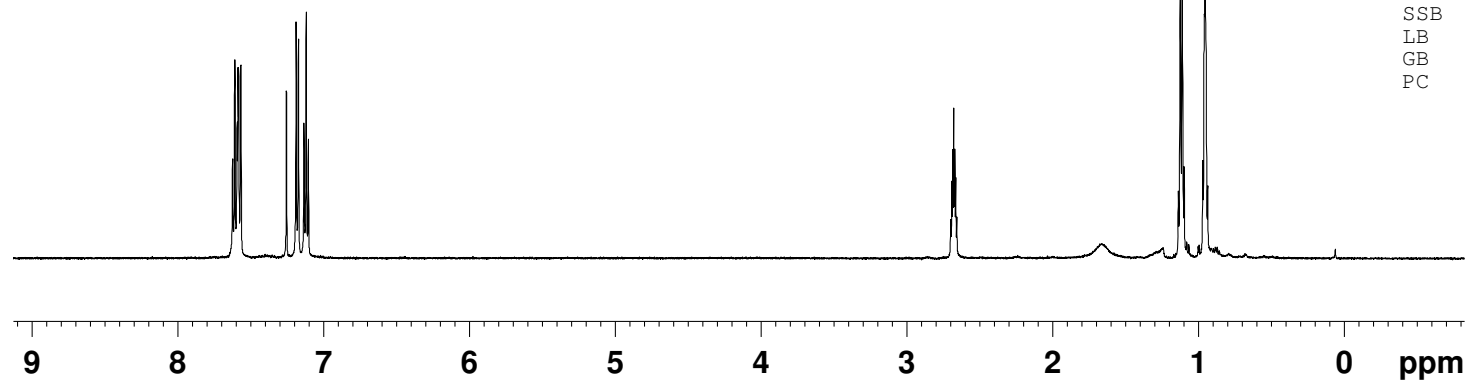

2.01  
1.01  
1.02

1.08

2.00  
2.02



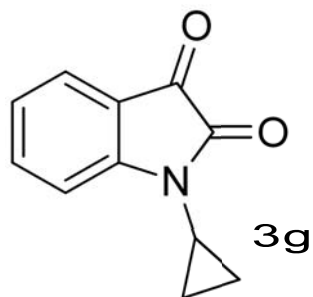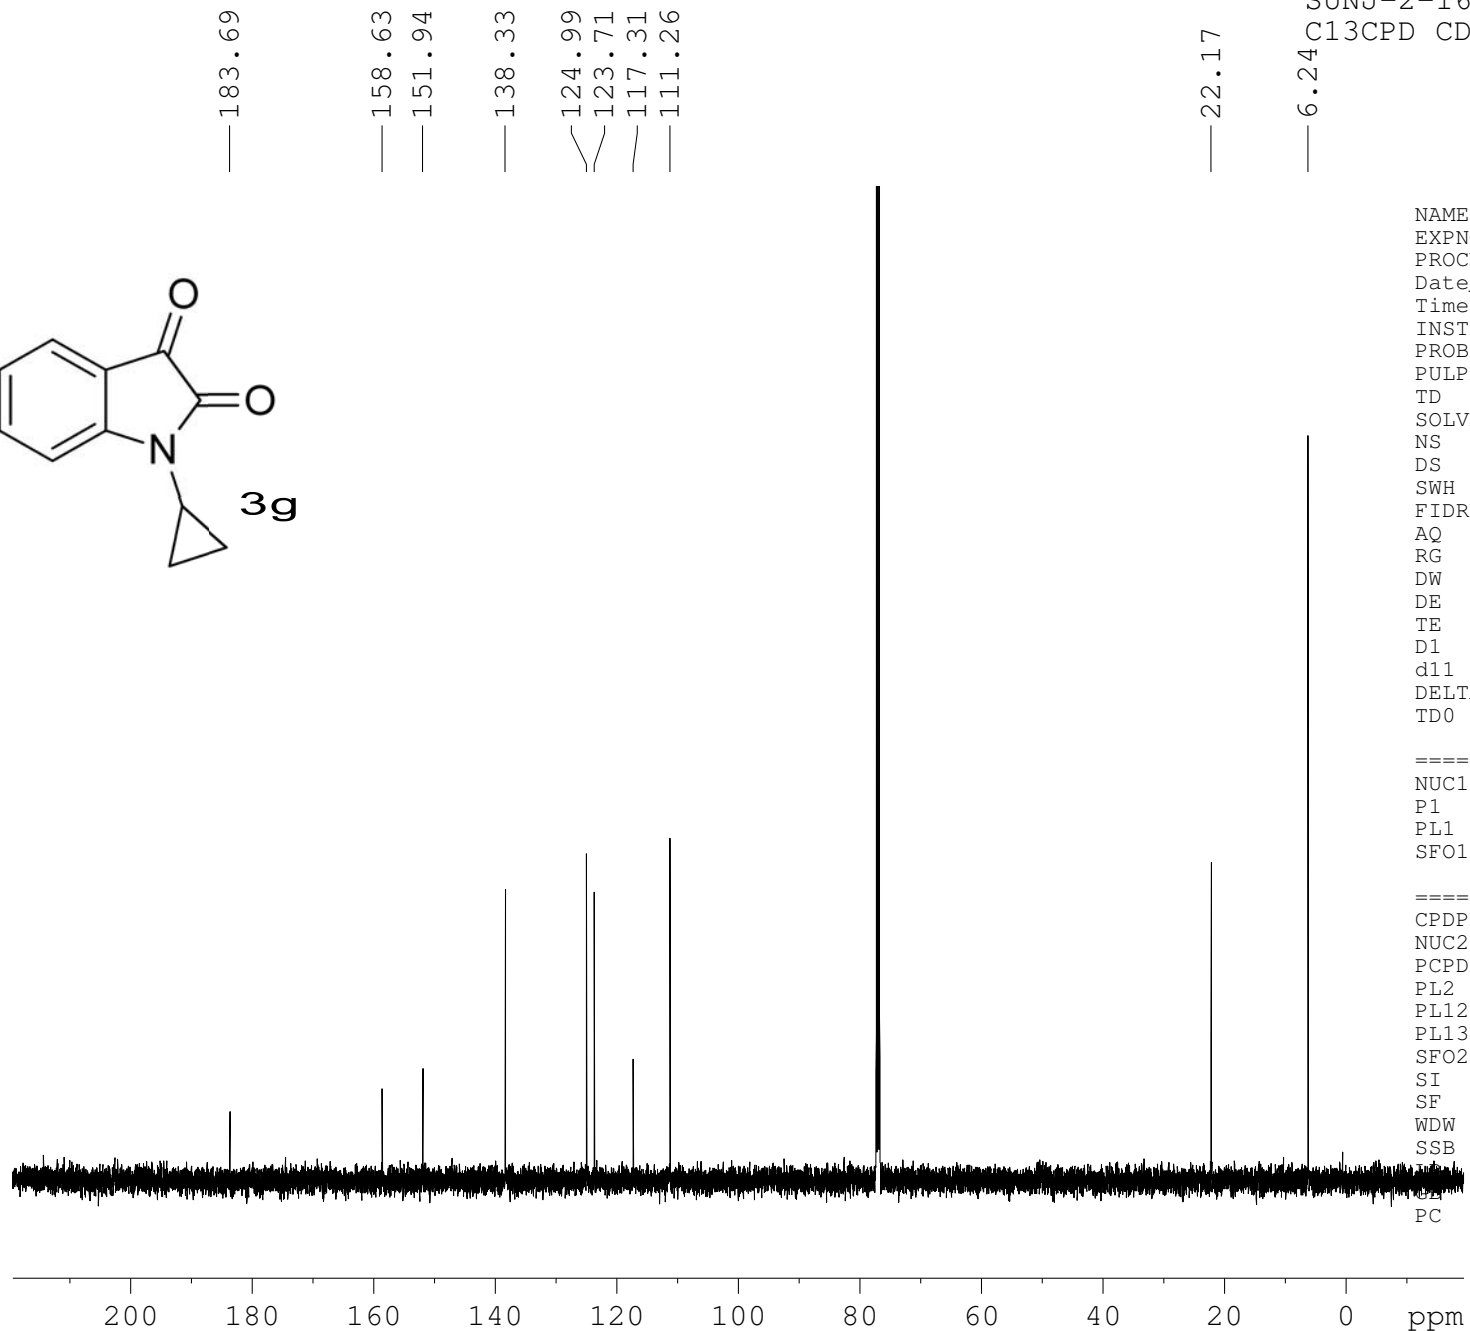

SUNJ-2-164A  
C13CPD CDC13 D:\\ deng 26

```
NAME          XB20120411
EXPNO          1
PROCNO         1
Date_          20120411
Time           10.04
INSTRUM        spect
PROBHD         5 mm PATXO 19F
PULPROG        zgpg30
TD             65536
SOLVENT        CDC13
NS             512
DS             4
SWH            30030.029 Hz
FIDRES         0.458222 Hz
AQ            1.0912410 sec
RG            114
DW            16.650 usec
DE            6.00 usec
TE            296.1 K
D1            2.00000000 sec
d11           0.03000000 sec
DELTA         1.89999998 sec
TD0           1
```

```
===== CHANNEL f1 =====
NUC1           13C
P1            9.50 usec
PL1           -0.50 dB
SFO1          125.7703643 MHz
```

```
===== CHANNEL f2 =====
CPDPRG2        waltz16
NUC2           1H
PCPD2          80.00 usec
PL2            1.00 dB
PL12           16.31 dB
PL13           16.50 dB
SFO2          500.1320005 MHz
SI            32768
SF            125.7577890 MHz
WDW            EM
SSB            0
GB            0
PC            1.40
```

SUNJ-2-115

PROTON CDC13 D:\ deng 29

7.596  
7.582  
7.559  
7.544  
7.528  
7.087  
7.071  
7.053

4.075  
4.050  
4.026  
2.163  
2.156  
2.136  
2.130  
2.111  
2.105  
2.086  
2.079  
1.926  
1.900  
1.835  
1.812  
1.754  
1.729  
1.438  
1.412  
1.385  
1.359  
1.297  
1.290  
1.274  
1.266  
1.244

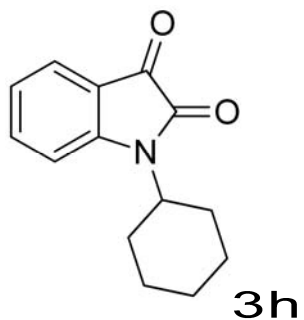

NAME CYS20111228  
EXPNO 3  
PROCNO 1  
Date\_ 20111228  
Time 15.12  
INSTRUM spect  
PROBHD 5 mm PATXO 19F  
PULPROG zg30  
TD 65536  
SOLVENT CDC13  
NS 8  
DS 2  
SWH 10330.578 Hz  
FIDRES 0.157632 Hz  
AQ 3.1720407 sec  
RG 228.1  
DW 48.400 usec  
DE 6.00 usec  
TE 293.9 K  
D1 1.00000000 sec  
TD0 1

===== CHANNEL f1 =====  
NUC1 1H  
P1 14.66 usec  
PL1 1.00 dB  
SFO1 500.1330885 MHz  
SI 32768  
SF 500.1300140 MHz  
WDW EM  
SSB 0  
LB 0.30 Hz  
GB 0  
PC 1.00

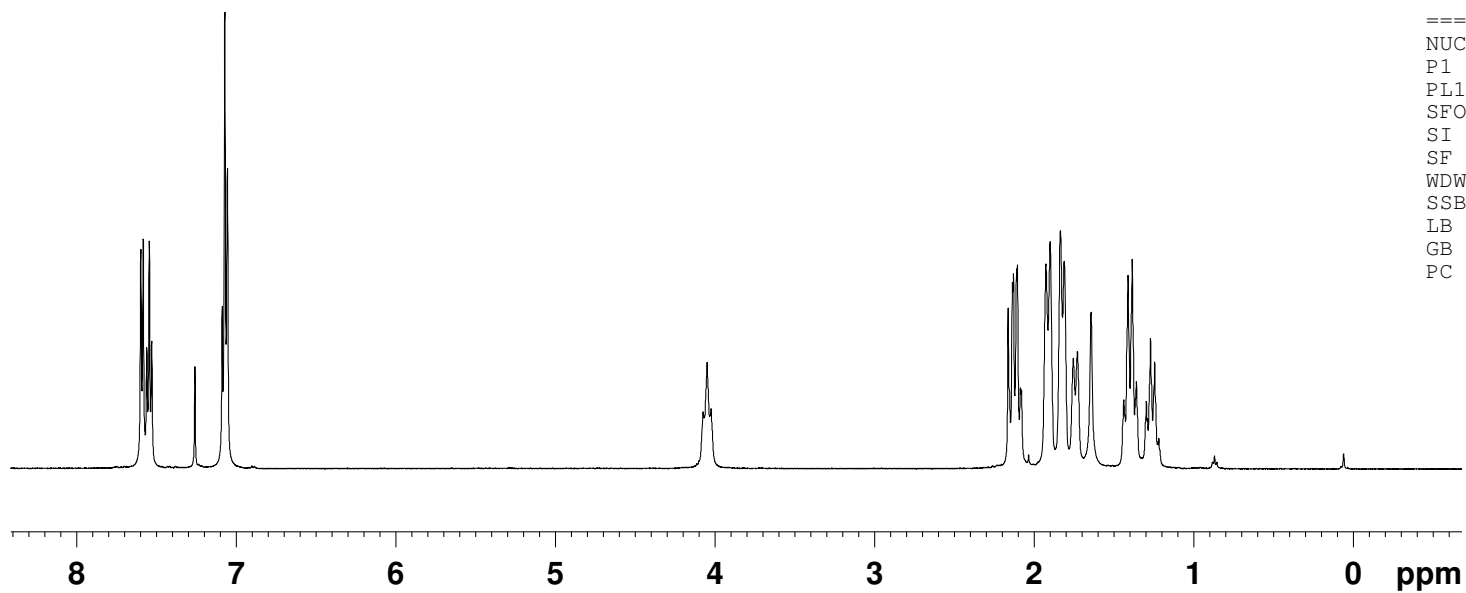

1.81  
1.87

1.00

S98

2.06  
4.89  
1.94  
1.12

SUNJ-2-115  
C13CPD CDC13 D:\\ deng 33

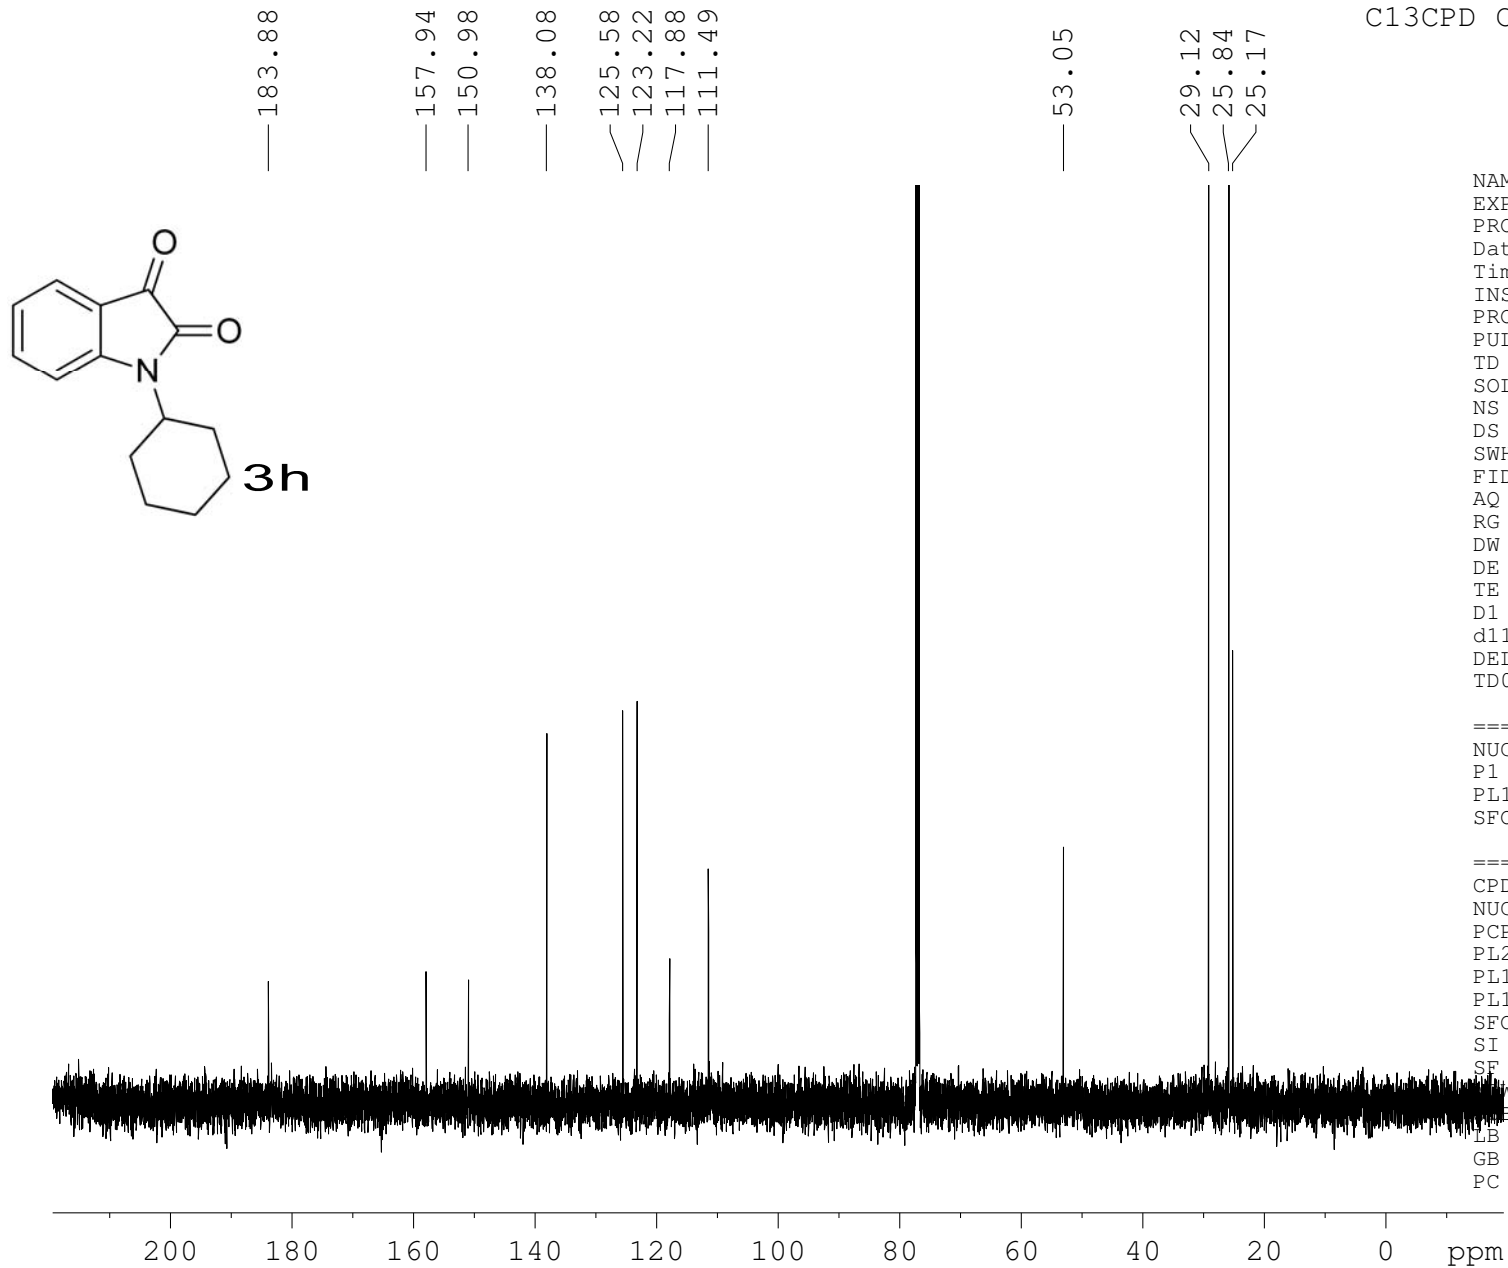

```
NAME          XB20111228
EXPNO         5
PROCNO        1
Date_         20111228
Time          15.52
INSTRUM       spect
PROBHD        5 mm PATXO 19F
PULPROG       zgpg30
TD            65536
SOLVENT       CDC13
NS            128
DS            4
SWH           30030.029 Hz
FIDRES        0.458222 Hz
AQ            1.0912410 sec
RG            114
DW            16.650 usec
DE            6.00 usec
TE            295.1 K
D1            2.0000000 sec
d11           0.0300000 sec
DELTA         1.89999998 sec
TD0           1
```

```
===== CHANNEL f1 =====
NUC1           13C
P1             9.50 usec
PL1            -0.50 dB
SFO1           125.7703643 MHz
```

```
===== CHANNEL f2 =====
CPDPRG2        waltz16
NUC2           1H
PCPD2          80.00 usec
PL2            2.00 dB
PL12           16.50 dB
PL13           16.50 dB
SFO2           500.1320005 MHz
SI             32768
SF             125.7577890 MHz
WDW            EM
SSB            0
LB             1.00 Hz
GB             0
PC             1.40
```

SUNJ-1-319-A

7.614  
7.599  
7.577  
7.561  
7.546  
7.131  
7.116  
7.101  
6.896  
6.881  
5.880  
5.869  
5.859  
5.848  
5.835  
5.824  
5.814  
5.803  
5.336  
5.301  
5.280  
4.368  
4.358

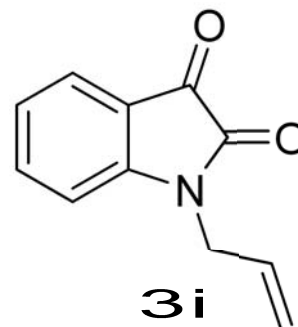

```
NAME          xb20111014
EXPNO         4
PROCNO        1
Date_         20111014
Time_         11.00
INSTRUM       spect
PROBHD        5 mm PATXO 19F
PULPROG       zg30
TD            65536
SOLVENT       CDCl3
NS            16
DS            2
SWH           10330.578 Hz
FIDRES        0.157632 Hz
AQ            3.1720407 sec
RG            256
DW            48.400 usec
DE            6.00 usec
TE            297.8 K
D1            1.00000000 sec
TDO           1
```

```
===== CHANNEL f1 =====
NUC1          1H
P1            14.66 usec
PL1           1.00 dB
SFO1          500.1330885 MHz
SI            32768
SF            500.1300139 MHz
WDW           no
SSB           0
LB            0.00 Hz
GB            0
PC            1.00
```

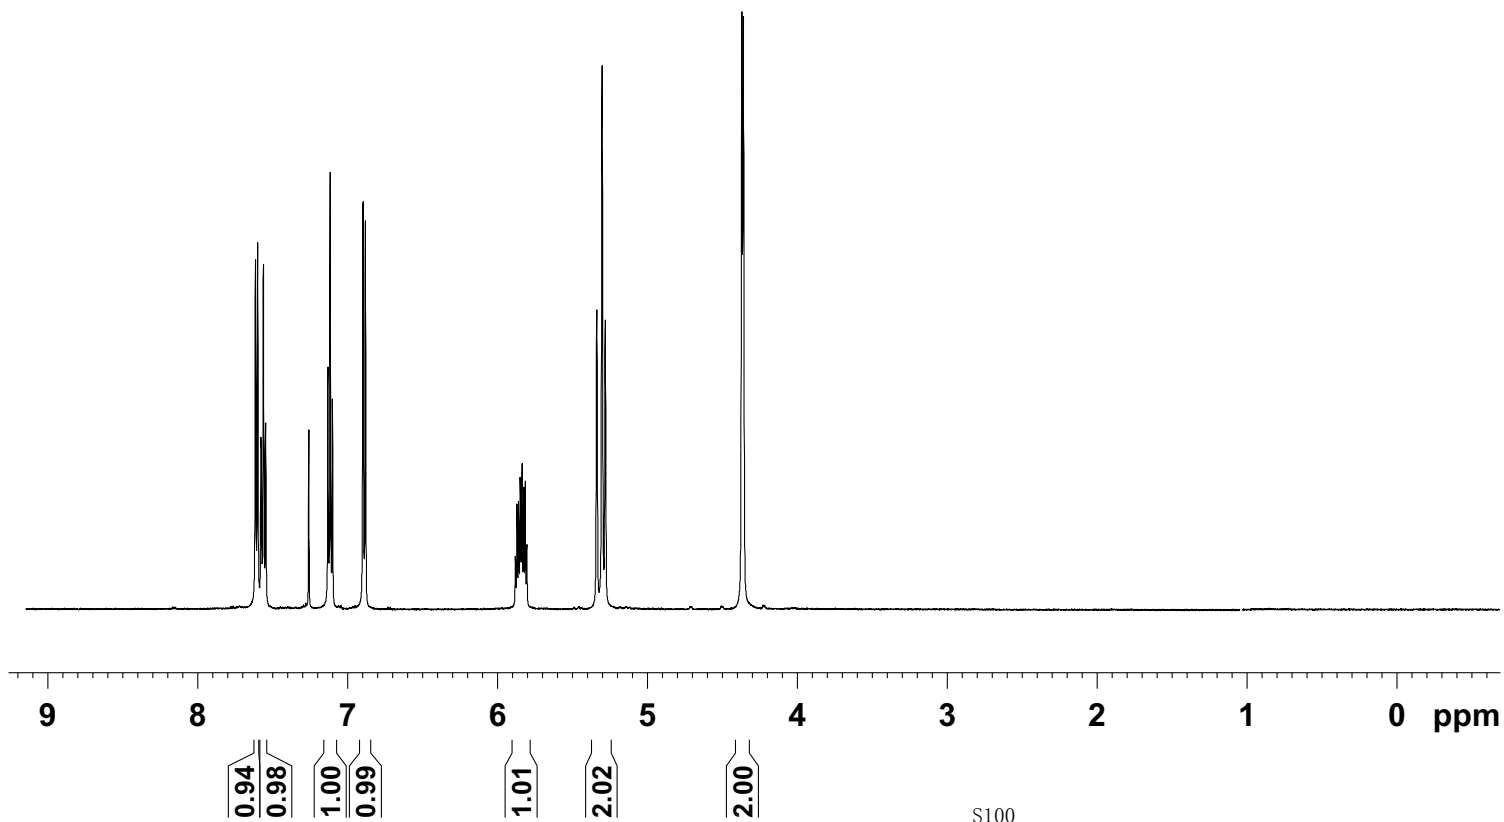

SUNJ-1-288-4  
C13CPD CDC13 D:\ deng 50

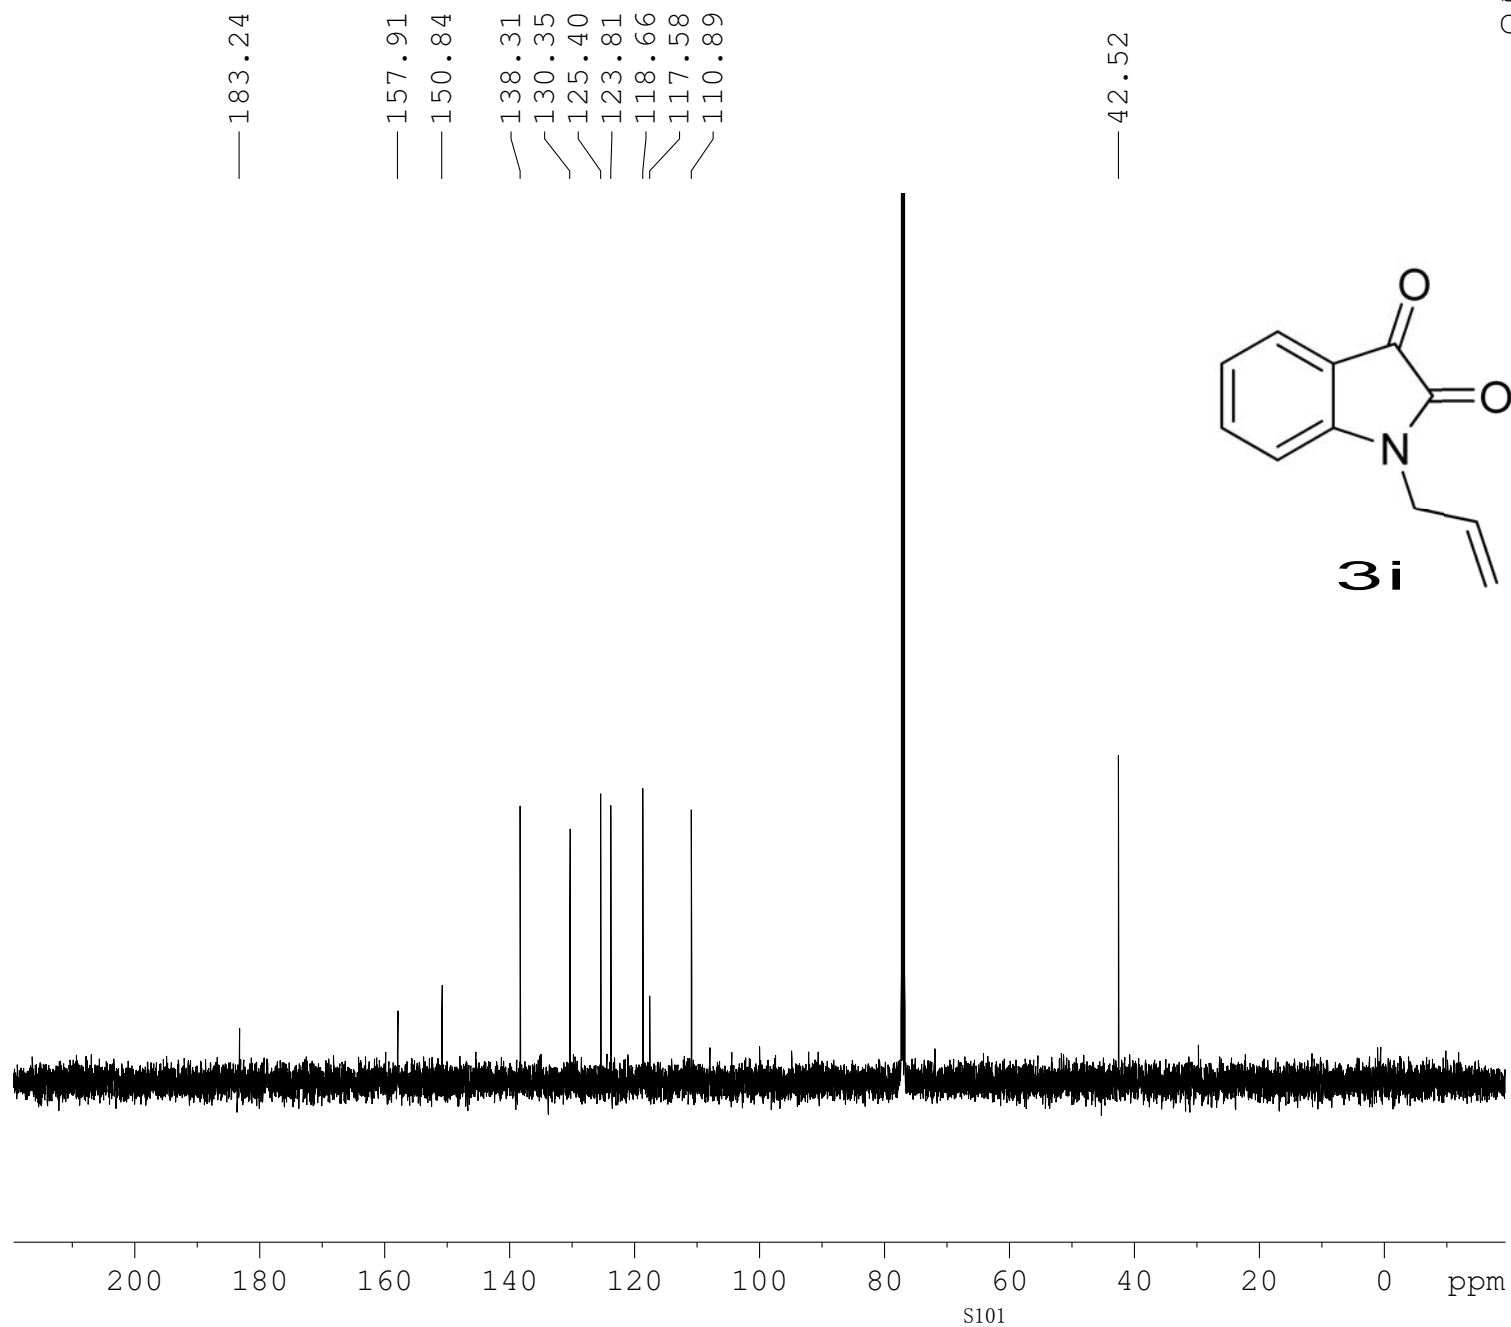

```
NAME sunj1
EXPNO 10
PROCNO 1
Date_ 20110928
Time 18.10
INSTRUM spect
PROBHD 5 mm PATXO 19F
PULPROG zgpg30
TD 65536
SOLVENT CDC13
NS 128
DS 4
SWH 30030.029 Hz
FIDRES 0.458222 Hz
AQ 1.0912410 sec
RG 161.3
DW 16.650 usec
DE 6.00 usec
TE 297.8 K
D1 2.00000000 sec
d11 0.03000000 sec
DELTA 1.89999998 sec
TD0 1
```

```
===== CHANNEL f1 =====
NUC1 13C
P1 9.50 usec
PL1 -0.50 dB
SFO1 125.7703643 MHz
```

```
===== CHANNEL f2 =====
CPDPRG2 waltz16
NUC2 1H
PCPD2 80.00 usec
PL2 2.00 dB
PL12 16.50 dB
PL13 16.50 dB
SFO2 500.1320005 MHz
SI 32768
SF 125.7577890 MHz
WDW EM
SSB 0
LB 1.00 Hz
GB 0
PC 1.40
```

SUNJ-1-285-1  
PROTON CDC13 D:\\ deng 20

7.609  
7.572  
7.558  
7.543  
7.340  
7.324  
7.310  
7.299  
7.273  
7.136  
7.121  
7.106  
6.796  
6.780

4.000  
3.986  
3.970  
3.050  
3.035  
3.020

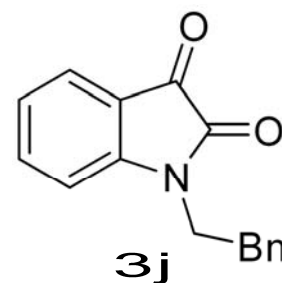

NAME XB20110927  
EXPNO 1  
PROCNO 1  
Date\_ 20110927  
Time 8.13  
INSTRUM spect  
PROBHD 5 mm PATXO 19F  
PULPROG zg30  
TD 65536  
SOLVENT CDC13  
NS 8  
DS 2  
SWH 10330.578 Hz  
FIDRES 0.157632 Hz  
AQ 3.1720407 sec  
RG 203.2  
DW 48.400 usec  
DE 6.00 usec  
TE 295.0 K  
D1 1.00000000 sec  
TD0 1

===== CHANNEL f1 =====  
NUC1 1H  
P1 13.76 usec  
PL1 1.00 dB  
SFO1 500.1330885 MHz  
SI 32768  
SF 500.1299934 MHz  
WDW no  
SSB 0  
LB 0.00 Hz  
GB 0  
PC 1.00

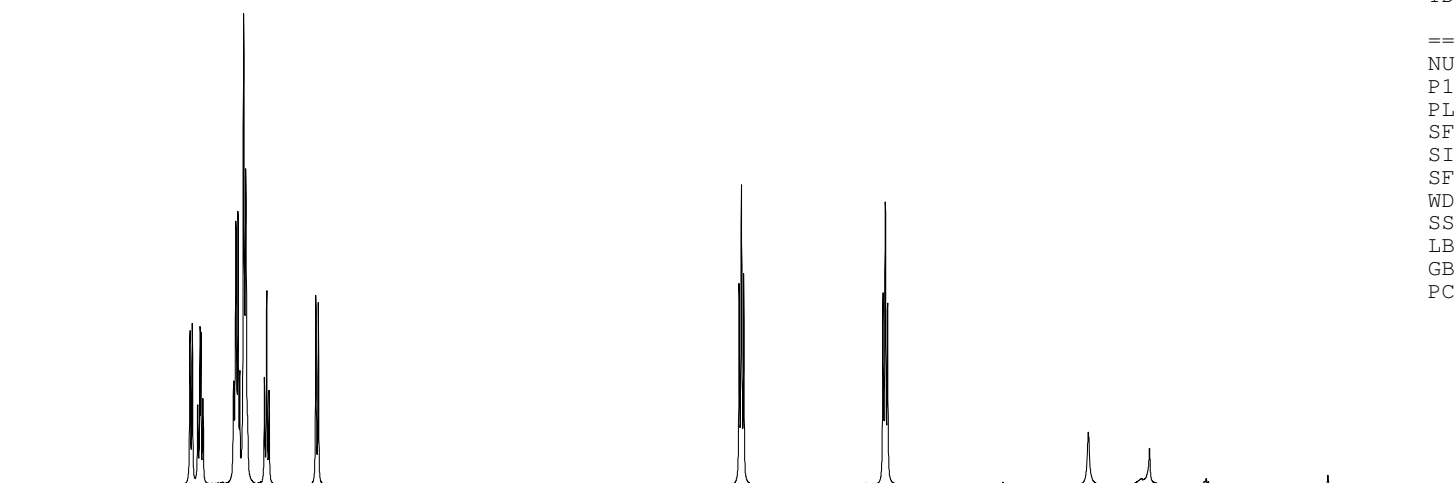

8 7 6 5 4 3 2 1 0 ppm

0.87  
0.94  
5.24  
0.97  
1.00

2.01

2.00  
S102

SUNJ-1-285-1  
C13CPD CDC13 D:\ deng 20

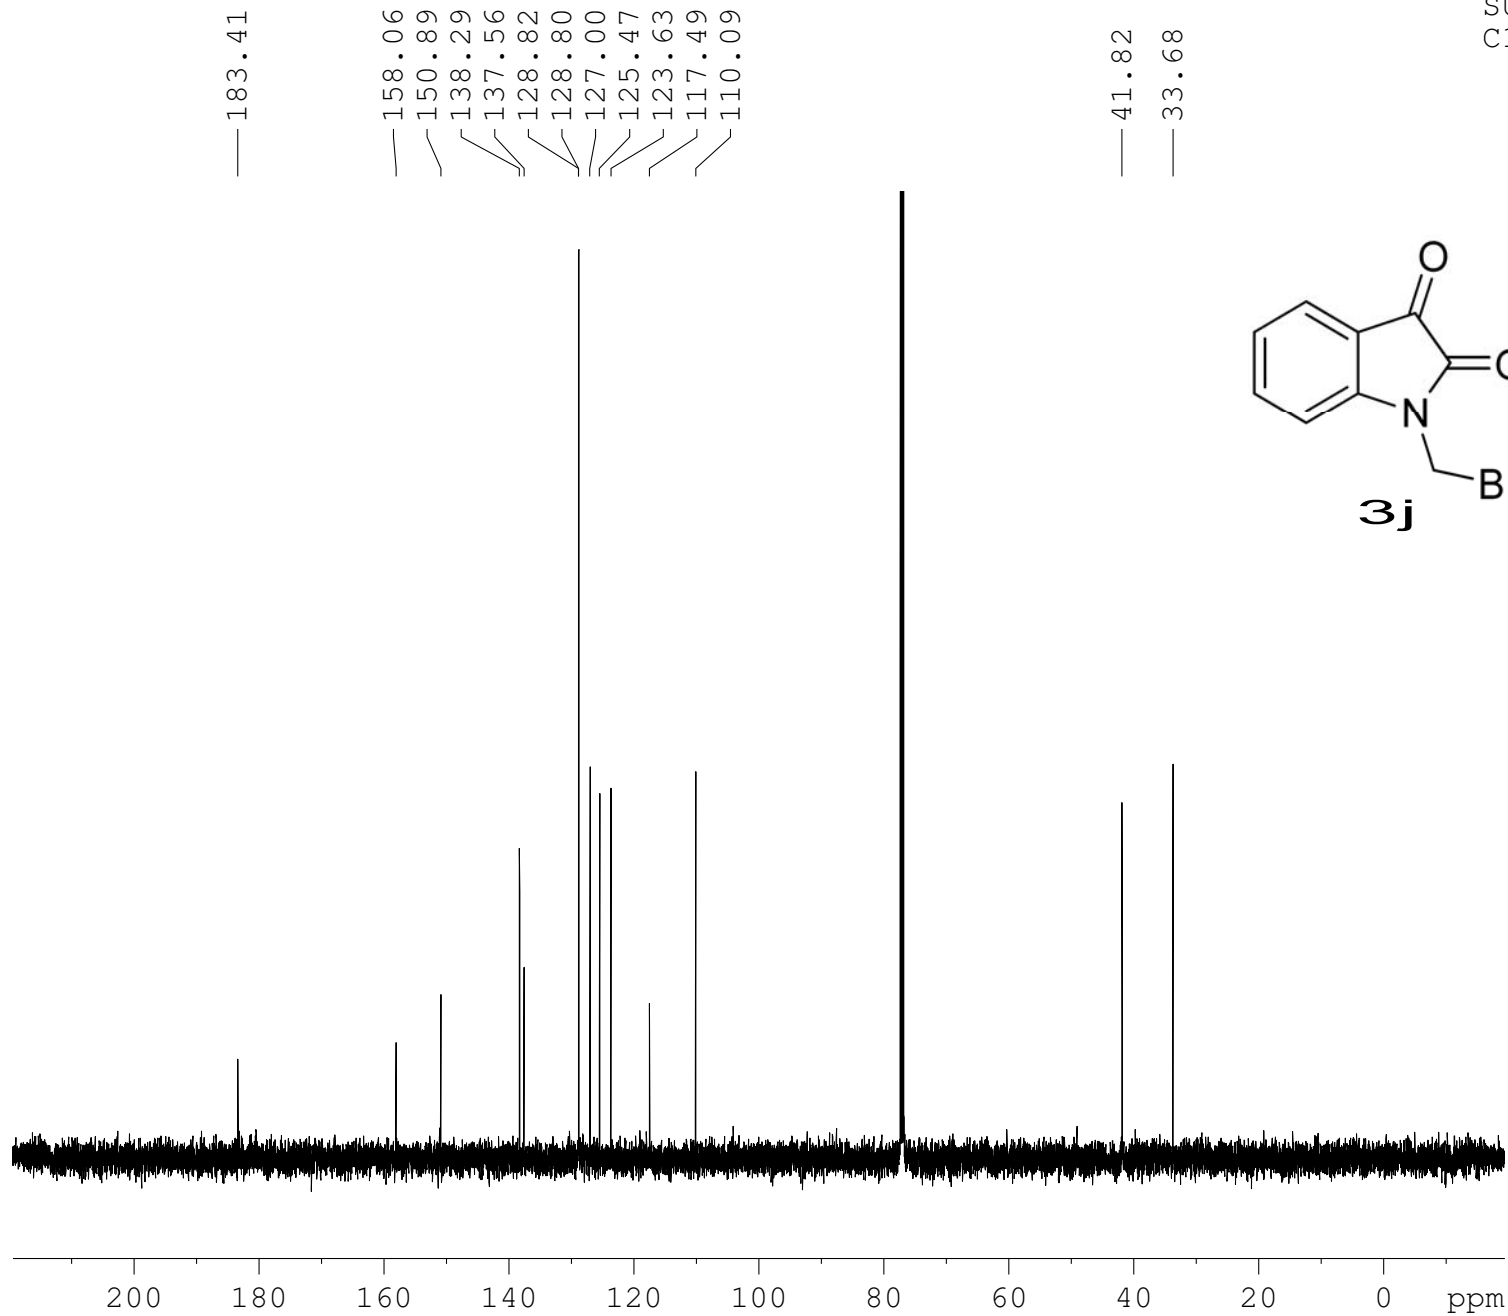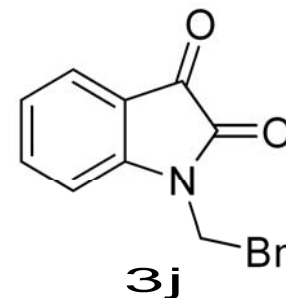

|         |                |
|---------|----------------|
| NAME    | XB20110927     |
| EXPNO   | 3              |
| PROCNO  | 1              |
| Date_   | 20110927       |
| Time    | 8.24           |
| INSTRUM | spect          |
| PROBHD  | 5 mm PATXO 19F |
| PULPROG | zgpg30         |
| TD      | 65536          |
| SOLVENT | CDC13          |
| NS      | 128            |
| DS      | 4              |
| SWH     | 30030.029 Hz   |
| FIDRES  | 0.458222 Hz    |
| AQ      | 1.0912410 sec  |
| RG      | 101.6          |
| DW      | 16.650 usec    |
| DE      | 6.00 usec      |
| TE      | 296.4 K        |
| D1      | 2.00000000 sec |
| d11     | 0.03000000 sec |
| DELTA   | 1.89999998 sec |
| TD0     | 1              |

==== CHANNEL f1 =====  
NUC1 13C  
P1 9.50 usec  
PL1 -0.50 dB  
SFO1 125.7703643 MHz

==== CHANNEL f2 =====  
CPDPRG2 waltz16  
NUC2 1H  
PCPD2 80.00 usec  
PL2 2.00 dB  
PL12 16.50 dB  
PL13 16.50 dB  
SFO2 500.1320005 MHz  
SI 32768  
SF 125.7577890 MHz  
WDW EM  
SSB 0  
LB 1.00 Hz  
GB 0  
PC 1.40

SUNJ-3-112H  
PROTON CDC13 D:\\ deng 54

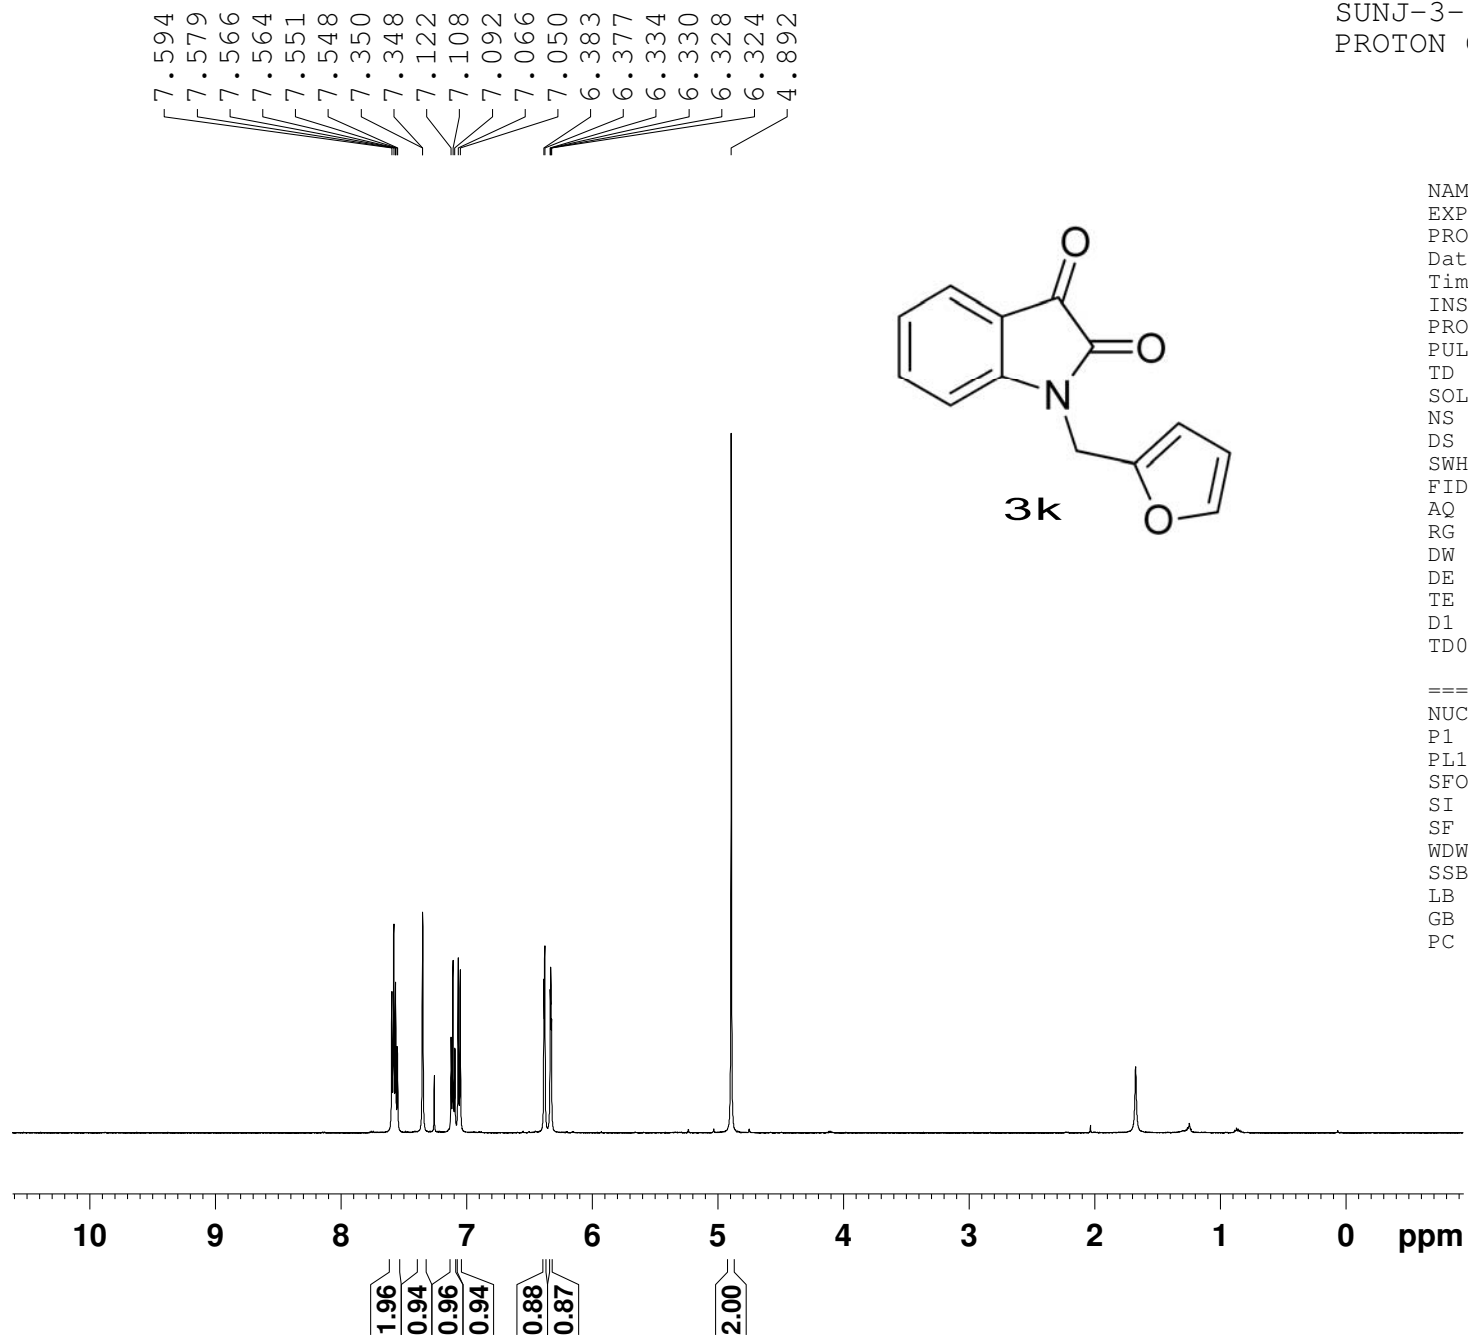

```
NAME          XB20120813
EXPNO         1
PROCNO        1
Date_         20120813
Time          10.09
INSTRUM       spect
PROBHD        5 mm PATXO 19F
PULPROG       zg30
TD            65536
SOLVENT       CDC13
NS            8
DS            2
SWH           10330.578 Hz
FIDRES        0.157632 Hz
AQ            3.1720407 sec
RG            203.2
DW            48.400 usec
DE            6.00 usec
TE            295.6 K
D1            1.00000000 sec
TD0           1

===== CHANNEL f1 =====
NUC1          1H
P1            13.72 usec
PL1           1.00 dB
SFO1          500.1330885 MHz
SI            32768
SF            500.1300144 MHz
WDW           no
SSB           0
LB            0.00 Hz
GB            0
PC            1.00
```



SUNJ-3-112H  
C13CPD CDC13 D:\\ deng 54

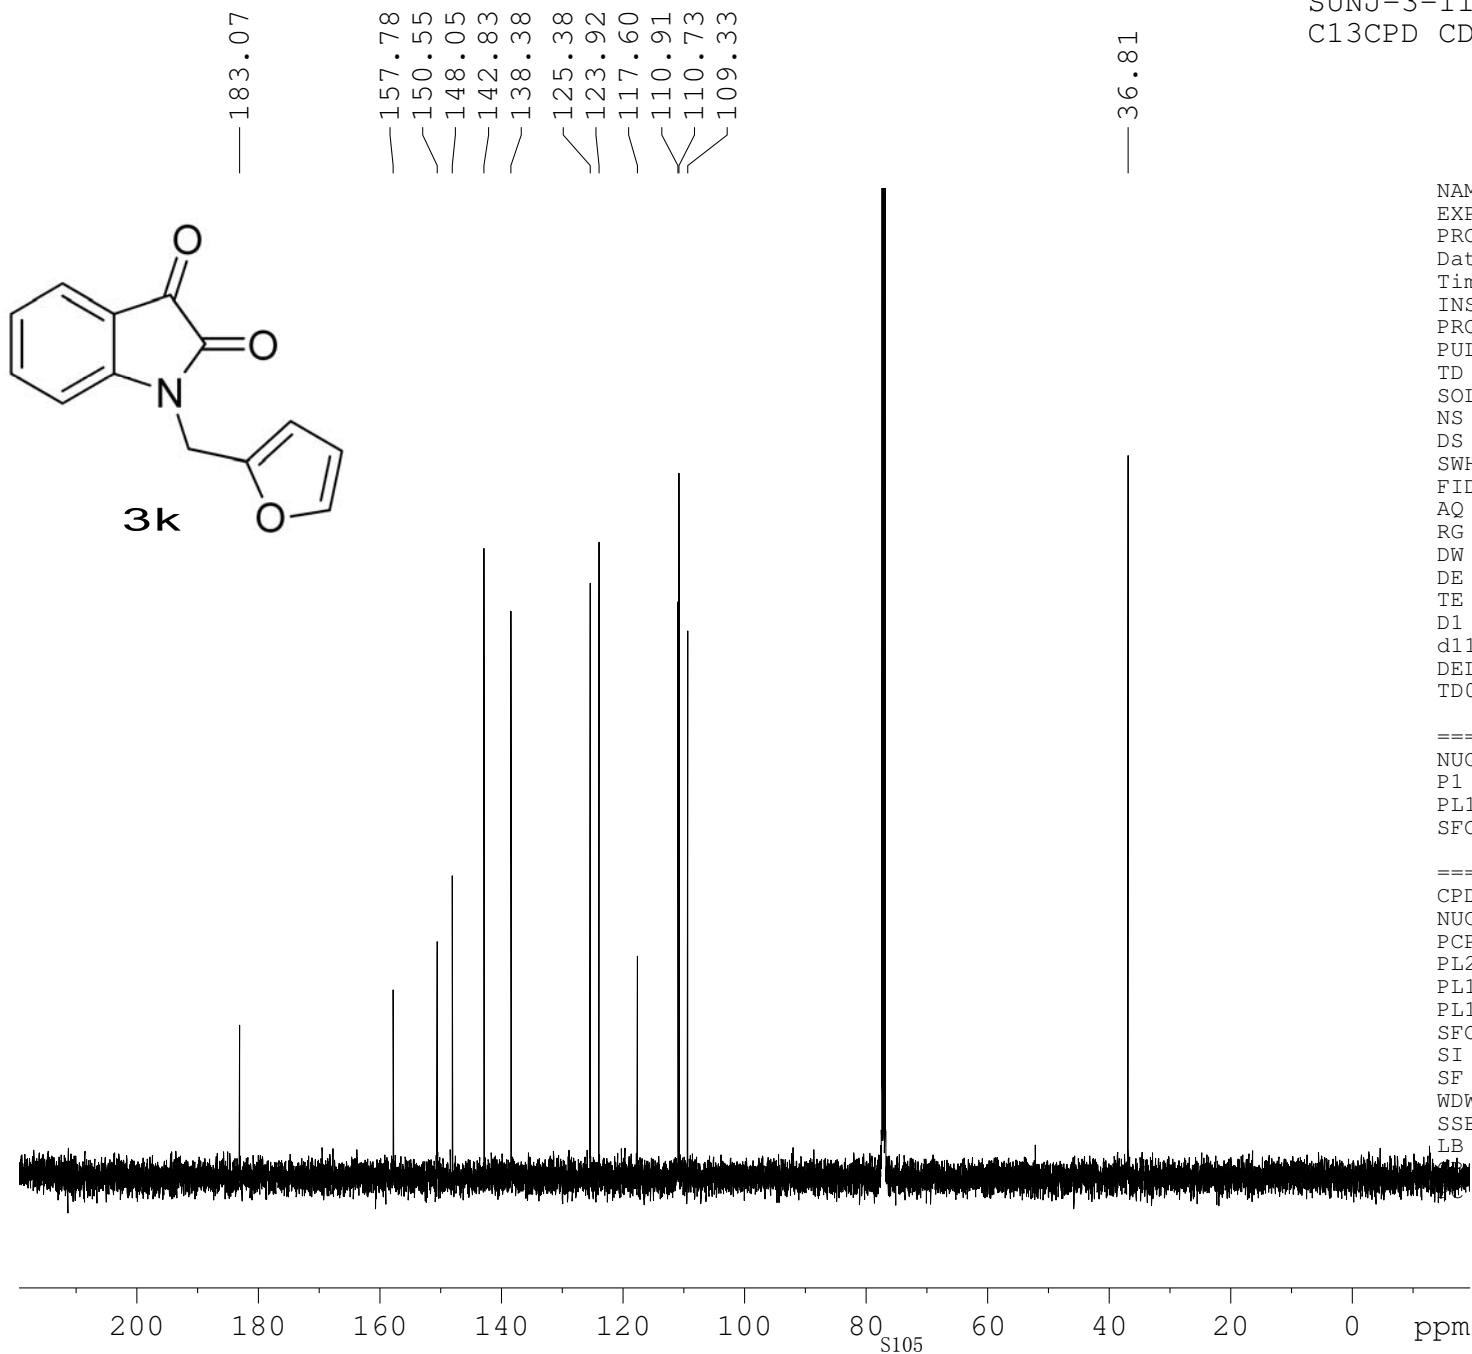

```
NAME          XB20120813
EXPNO         3
PROCNO        1
Date_         20120813
Time          10.26
INSTRUM       spect
PROBHD        5 mm PATXO 19F
PULPROG       zgpg30
TD            65536
SOLVENT       CDC13
NS            256
DS            4
SWH           30030.029 Hz
FIDRES        0.458222 Hz
AQ            1.0912410 sec
RG            128
DW            16.650 usec
DE            6.00 usec
TE            297.1 K
D1            2.00000000 sec
d11           0.03000000 sec
DELTA         1.89999998 sec
TD0           1
```

```
===== CHANNEL f1 =====
NUC1          13C
P1            9.50 usec
PL1           -0.50 dB
SFO1          125.7703643 MHz
```

```
===== CHANNEL f2 =====
CPDPRG2       waltz16
NUC2          1H
PCPD2         80.00 usec
PL2           1.00 dB
PL12          16.31 dB
PL13          16.50 dB
SFO2          500.1320005 MHz
SI            32768
SF            125.7577890 MHz
WDW           EM
SSB           0
LB            1.00 Hz
              0
              1.40
```

SUNJ-1-327-1AA  
PROTON DMSO D:\ deng 52

7.664  
7.649  
7.634  
7.551  
7.537  
7.213  
7.197  
7.131  
7.116  
7.102

3.756  
3.746  
3.735  
3.637  
3.626  
3.616

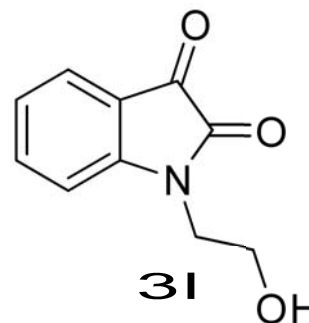

NAME XB20111031  
EXPNO 4  
PROCNO 1  
Date\_ 20111031  
Time 14.01  
INSTRUM spect  
PROBHD 5 mm PATXO 19F  
PULPROG zg30  
TD 65536  
SOLVENT DMSO  
NS 16  
DS 2  
SWH 10330.578 Hz  
FIDRES 0.157632 Hz  
AQ 3.1720407 sec  
RG 181  
DW 48.400 usec  
DE 6.00 usec  
TE 294.5 K  
D1 1.00000000 sec  
TD0 1

==== CHANNEL f1 =====  
NUC1 1H  
P1 14.66 usec  
PL1 1.00 dB  
SFO1 500.1330885 MHz  
SI 32768  
SF 500.130000 MHz  
WDW EM  
SSB 0  
LB 0.30 Hz  
GB 0  
PC 1.00

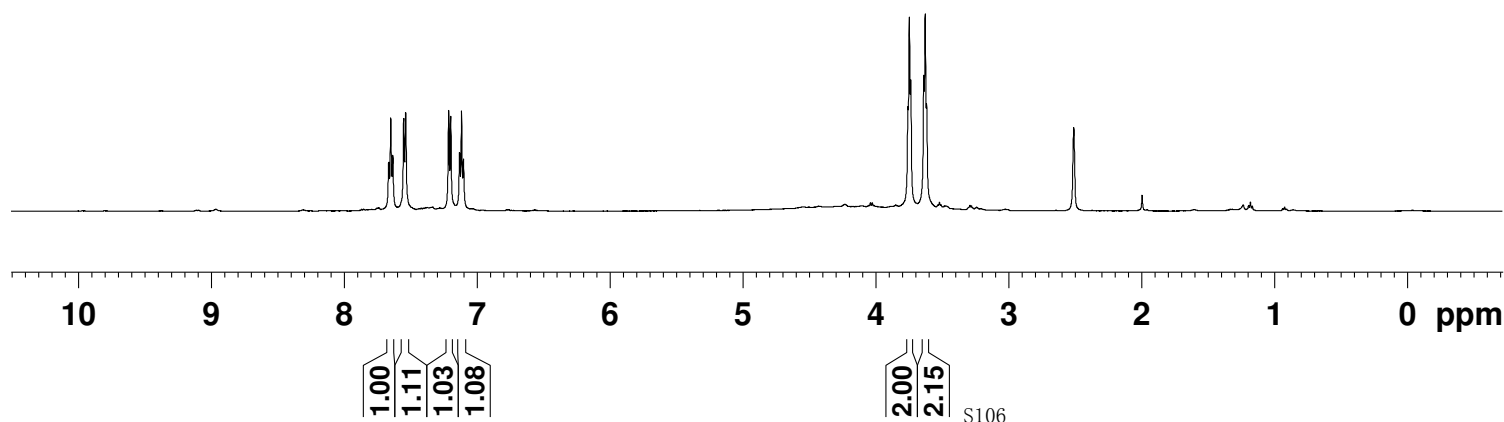

SUNJ-1-327-1AA  
C13CPD DMSO D:\ deng 52

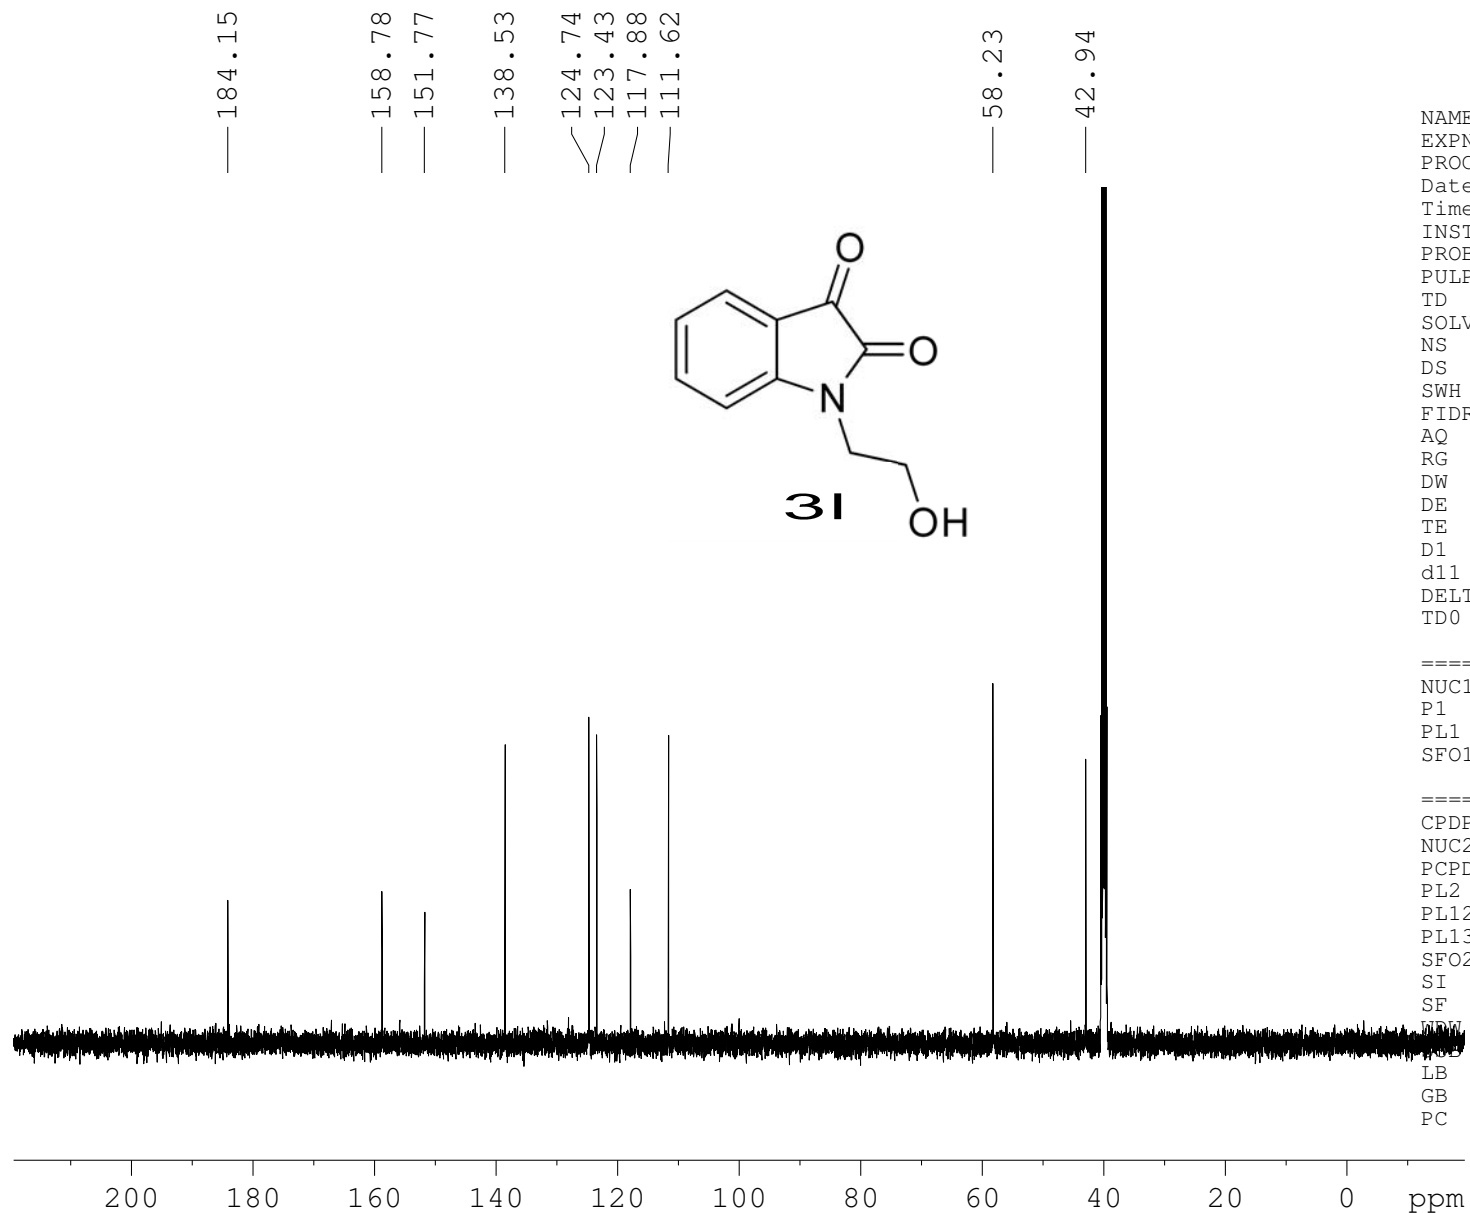

```
NAME          XB20111031
EXPNO         6
PROCNO        1
Date_         20111031
Time          14.12
INSTRUM       spect
PROBHD        5 mm PATXO 19F
PULPROG       zgpg30
TD            65536
SOLVENT       DMSO
NS            128
DS            4
SWH           30030.029 Hz
FIDRES        0.458222 Hz
AQ            1.0912410 sec
RG            181
DW            16.650 usec
DE            6.00 usec
TE            295.7 K
D1            2.0000000 sec
d11           0.0300000 sec
DELTA         1.89999998 sec
TD0           1
```

```
===== CHANNEL f1 =====
NUC1           13C
P1              9.50 usec
PL1            -0.50 dB
SFO1           125.7703643 MHz
```

```
===== CHANNEL f2 =====
CPDPRG2        waltz16
NUC2            1H
PCPD2           80.00 usec
PL2              2.00 dB
PL12            16.50 dB
PL13            16.50 dB
SFO2           500.1320005 MHz
SI              32768
SF             125.7577890 MHz
WDW             EM
SSB              0
LB              1.00 Hz
GB              0
PC              1.40
```

SUNJ-2-153-1  
PROTON CDC13 D:\ deng 15

7.344  
7.341  
7.329  
7.324  
7.310  
7.299  
7.294  
7.144  
7.139  
7.031  
7.025  
7.013  
7.008  
6.679  
6.662

— 4.898

— 3.765

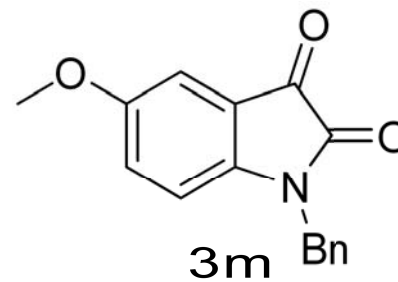

NAME XB20120319  
EXPNO 1  
PROCNO 1  
Date\_ 20120319  
Time 16.05  
INSTRUM spect  
PROBHD 5 mm PATXO 19F  
PULPROG zg30  
TD 65536  
SOLVENT CDC13  
NS 8  
DS 2  
SWH 10330.578 Hz  
FIDRES 0.157632 Hz  
AQ 3.1720407 sec  
RG 256  
DW 48.400 usec  
DE 6.00 usec  
TE 294.0 K  
D1 1.00000000 sec  
TD0 1

==== CHANNEL f1 =====  
NUC1 1H  
P1 13.70 usec  
PL1 1.00 dB  
SF01 500.1330885 MHz  
SI 32768  
SF 500.1300129 MHz  
WDW no  
SSB 0  
LB 0.00 Hz  
GB 0  
PC 1.00

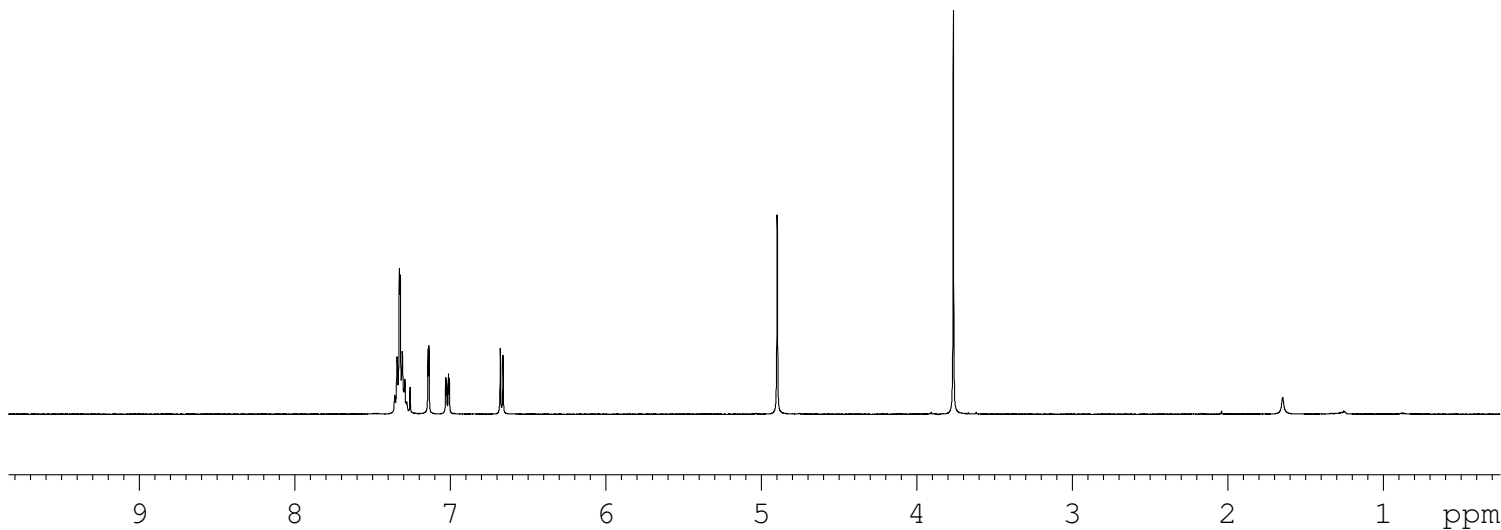

5.03  
1.05  
1.04  
1.06  
2.15  
3.00  
S108

SUNJ-2-153-1  
C13CPD CDC13 D:\ deng 15

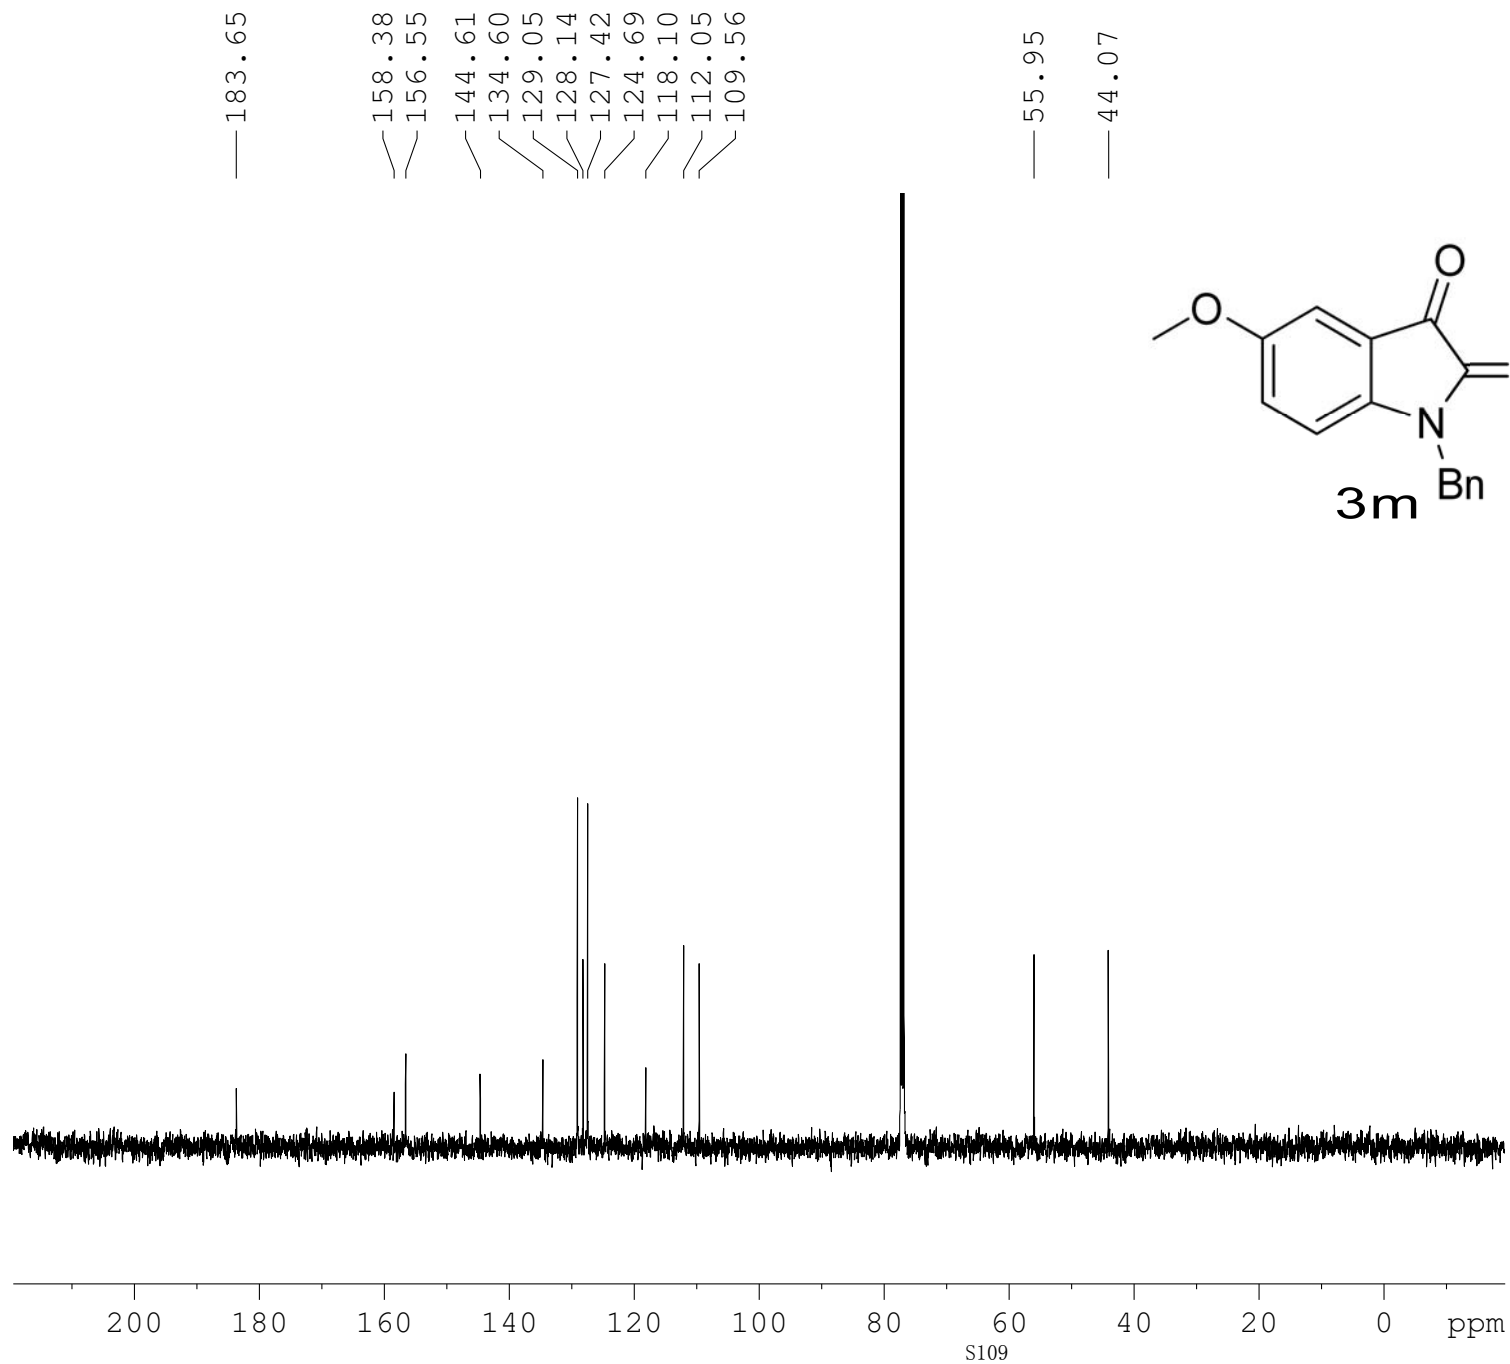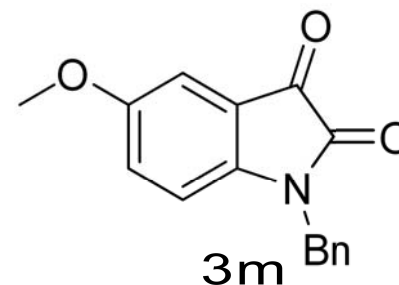

|         |                |
|---------|----------------|
| NAME    | XB20120319     |
| EXPNO   | 3              |
| PROCNO  | 1              |
| Date_   | 20120319       |
| Time    | 16.15          |
| INSTRUM | spect          |
| PROBHD  | 5 mm PATXO 19F |
| PULPROG | zgpg30         |
| TD      | 65536          |
| SOLVENT | CDC13          |
| NS      | 128            |
| DS      | 4              |
| SWH     | 30030.029 Hz   |
| FIDRES  | 0.458222 Hz    |
| AQ      | 1.0912410 sec  |
| RG      | 114            |
| DW      | 16.650 usec    |
| DE      | 6.00 usec      |
| TE      | 295.2 K        |
| D1      | 2.0000000 sec  |
| d11     | 0.03000000 sec |
| DELTA   | 1.89999998 sec |
| TD0     | 1              |

==== CHANNEL f1 =====

|      |                 |
|------|-----------------|
| NUC1 | 13C             |
| P1   | 9.50 usec       |
| PL1  | -0.50 dB        |
| SFO1 | 125.7703643 MHz |

==== CHANNEL f2 =====

|         |                 |
|---------|-----------------|
| CPDPRG2 | waltz16         |
| NUC2    | 1H              |
| PCPD2   | 80.00 usec      |
| PL2     | 1.00 dB         |
| PL12    | 16.33 dB        |
| PL13    | 16.50 dB        |
| SFO2    | 500.1320005 MHz |
| SI      | 32768           |
| SF      | 125.7577890 MHz |
| WDW     | EM              |
| SSB     | 0               |
| LB      | 3.00 Hz         |
| GB      | 0               |
| PC      | 0.20            |

SUNJ-2-148-6  
PROTON CDC13 D:\ deng 54

7.370  
7.355  
7.341  
7.331  
7.328  
7.317  
7.307  
7.303  
7.111  
6.250

4.913

3.841  
3.837

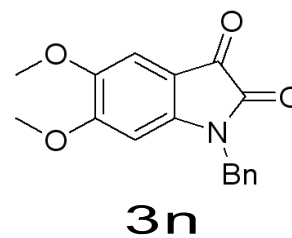

NAME XB20120316  
EXPNO 5  
PROCNO 1  
Date\_ 20120316  
Time\_ 14.35  
INSTRUM spect  
PROBHD 5 mm PATXO 19F  
PULPROG zg30  
TD 65536  
SOLVENT CDC13  
NS 8  
DS 2  
SWH 10330.578 Hz  
FIDRES 0.157632 Hz  
AQ 3.1720407 sec  
RG 181  
DW 48.400 usec  
DE 6.00 usec  
TE 294.2 K  
D1 1.00000000 sec  
TD0 1

==== CHANNEL f1 =====  
NUC1 1H  
P1 13.70 usec  
PL1 1.00 dB  
SFO1 500.1330885 MHz  
SI 32768  
SF 500.1300000 MHz  
WDW no  
SSB 0  
LB 0.00 Hz  
GB 0  
PC 1.00

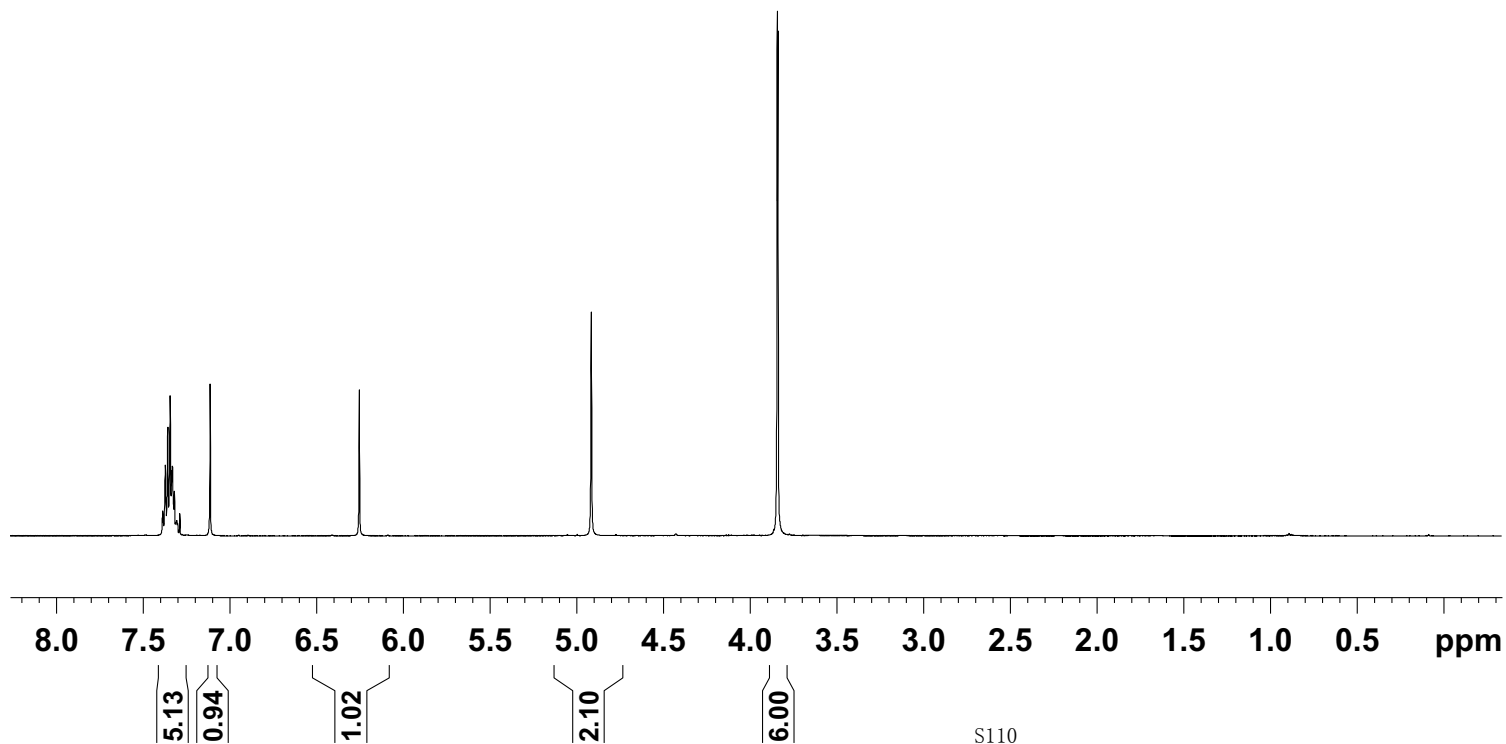

SUNJ-2-148-6  
C13CPD CDC13 D:\\ deng 54

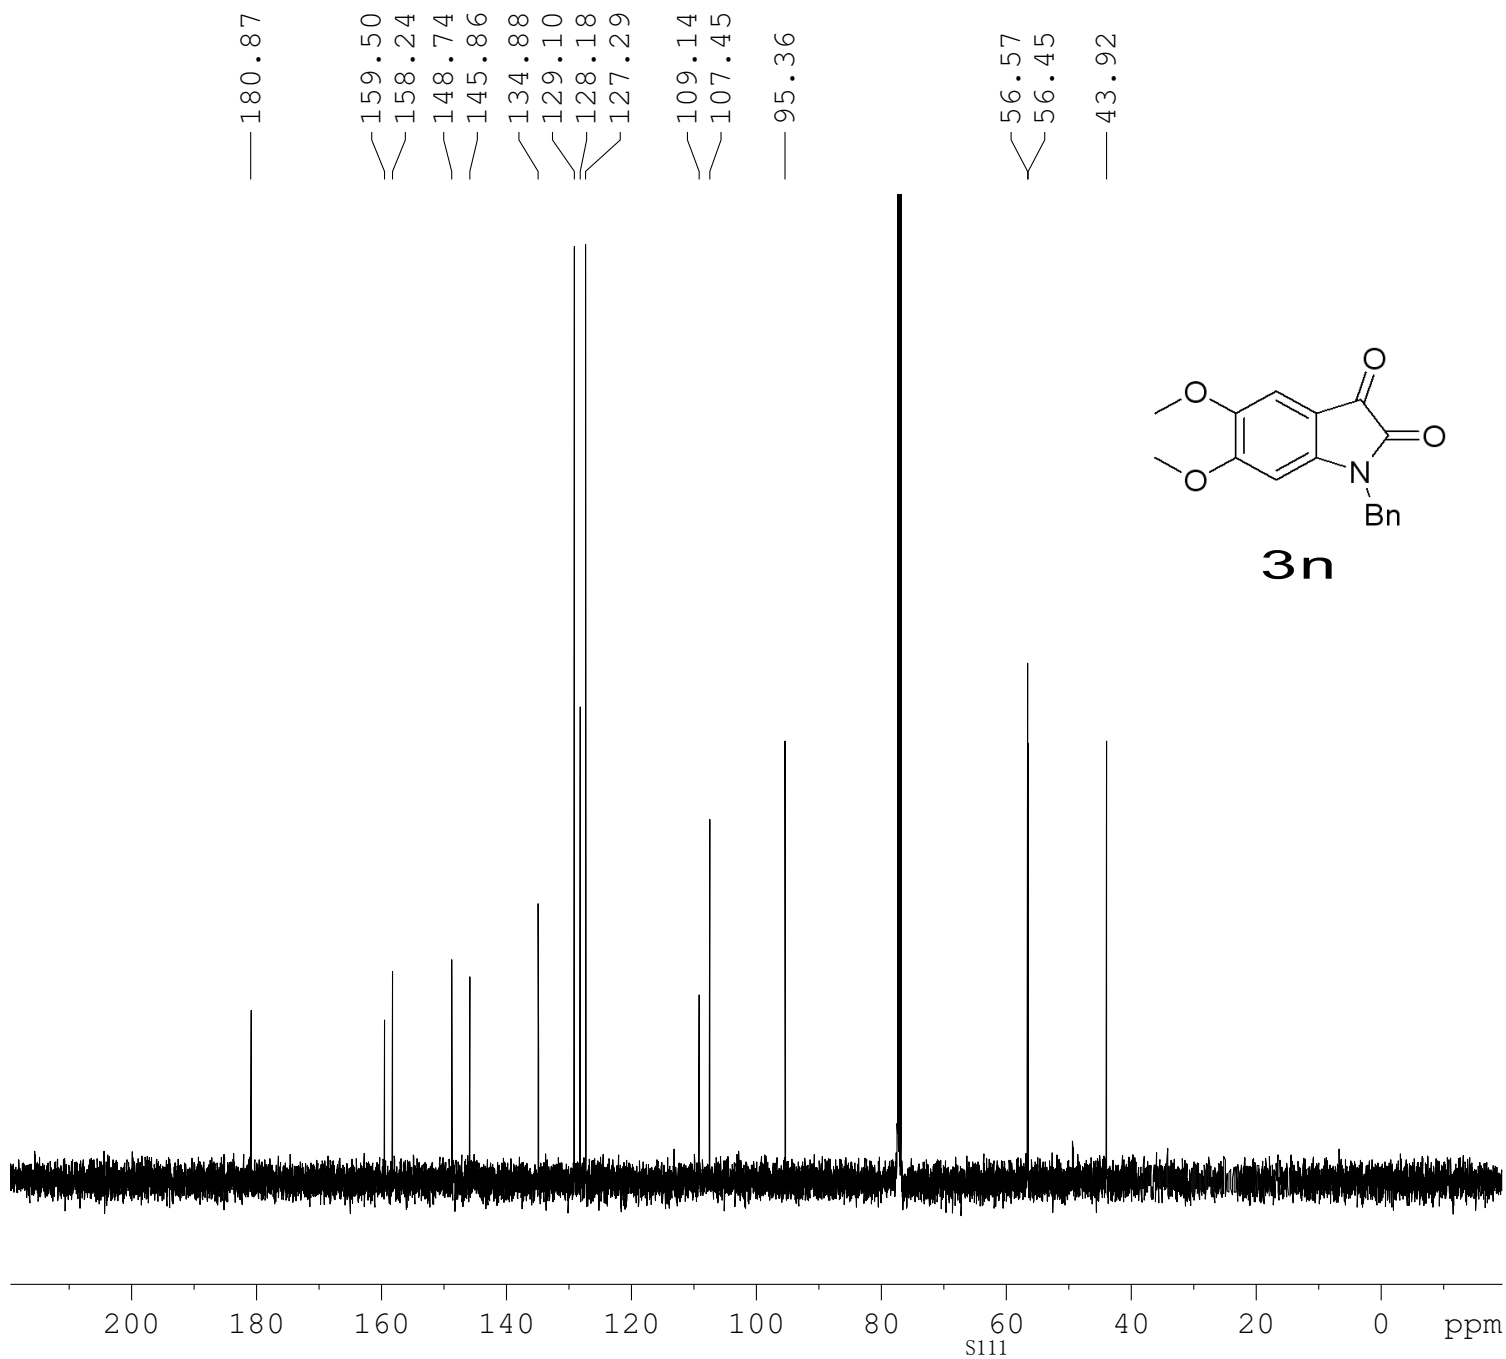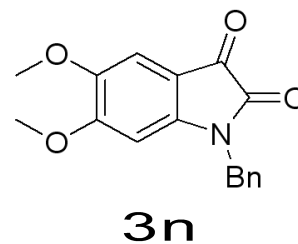

NAME XB20120316  
EXPNO 6  
PROCNO 1  
Date\_ 20120316  
Time 14.43  
INSTRUM spect  
PROBHD 5 mm PATXO 19F  
PULPROG zgpg30  
TD 65536  
SOLVENT CDC13  
NS 128  
DS 4  
SWH 30030.029 Hz  
FIDRES 0.458222 Hz  
AQ 1.0912410 sec  
RG 362  
DW 16.650 usec  
DE 6.00 usec  
TE 295.3 K  
D1 2.00000000 sec  
d11 0.03000000 sec  
DELTA 1.89999998 sec  
TD0 1

==== CHANNEL f1 =====  
NUC1 13C  
P1 9.50 usec  
PL1 -0.50 dB  
SFO1 125.7703643 MHz

==== CHANNEL f2 =====  
CPDPRG2 waltz16  
NUC2 1H  
PCPD2 80.00 usec  
PL2 1.00 dB  
PL12 16.33 dB  
PL13 16.50 dB  
SFO2 500.1320005 MHz  
SI 32768  
SF 125.7577890 MHz  
WDW EM  
SSB 0  
LB 1.00 Hz  
GB 0  
PC 1.40

SUNJ-2-157  
PROTON CDC13 D:\ deng 58

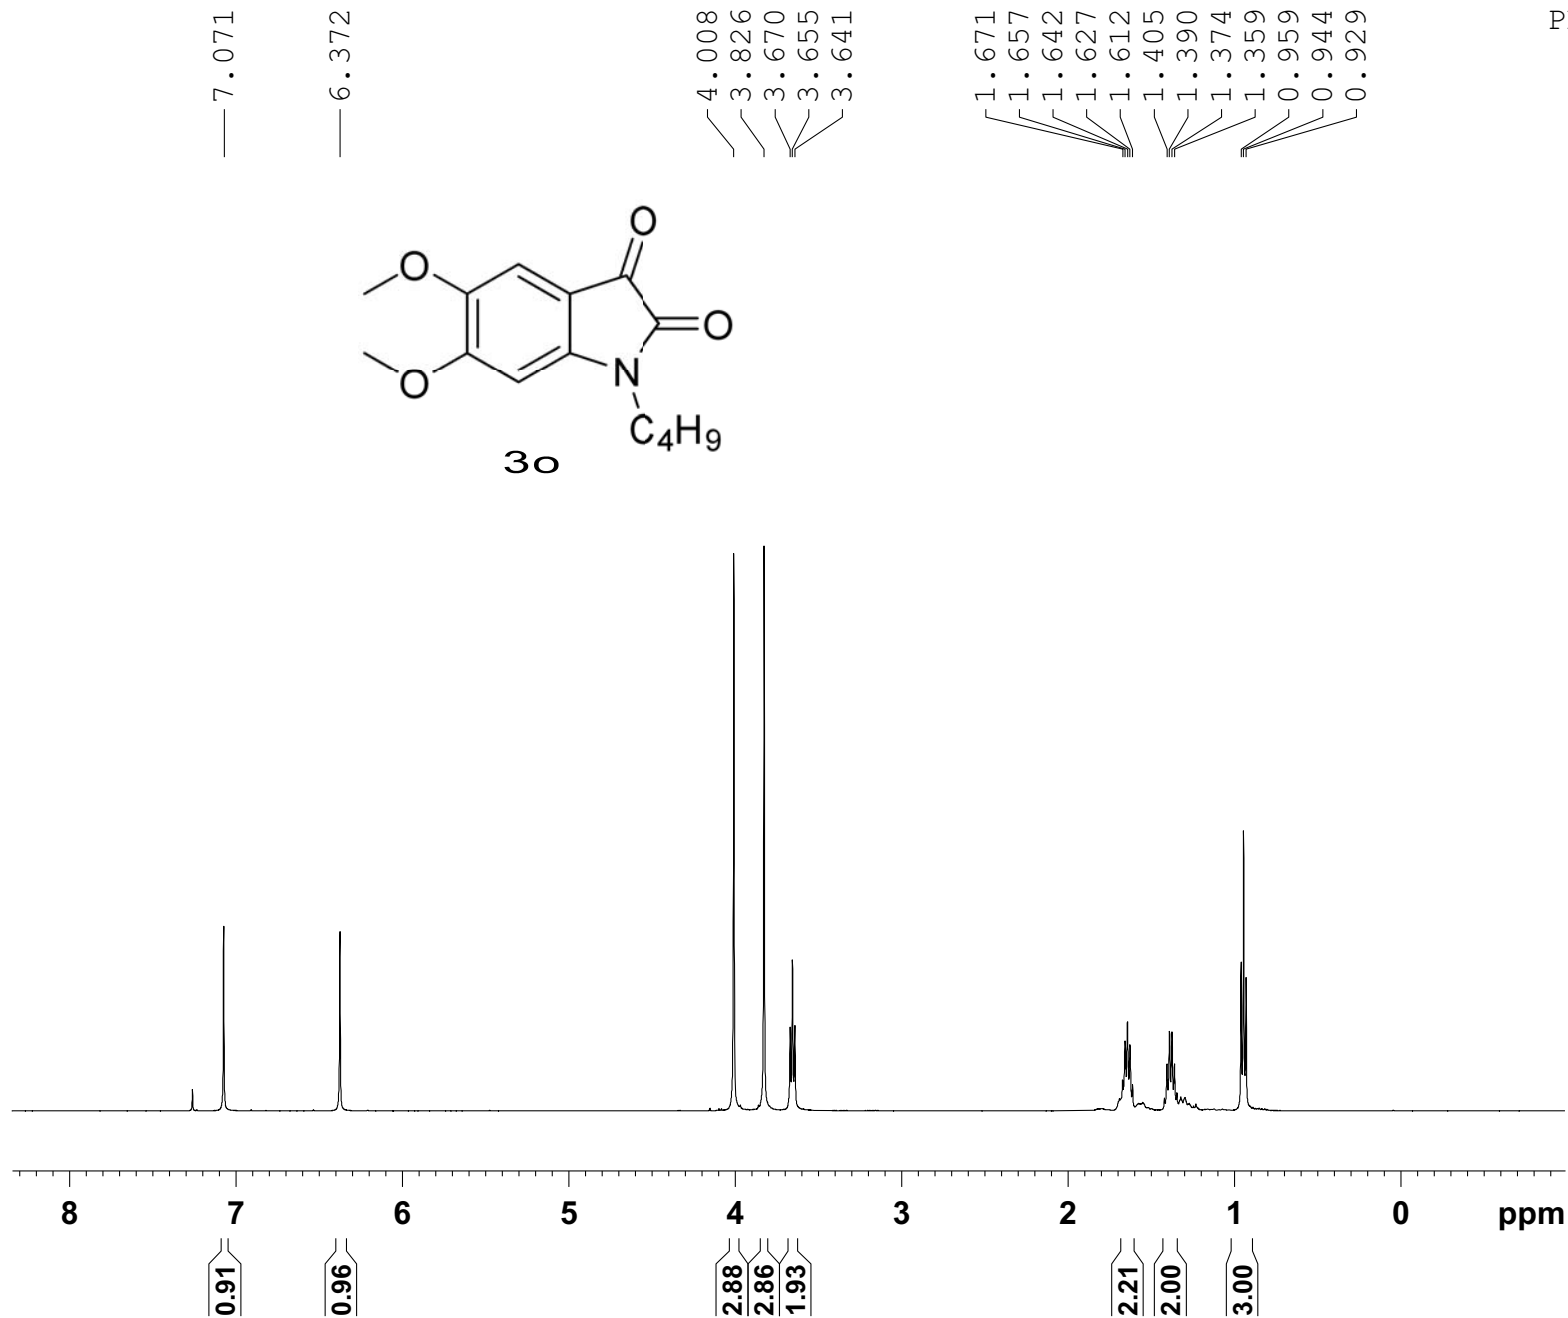

```
NAME          XB20120326
EXPNO          1
PROCNO         1
Date_          20120326
Time_          9.39
INSTRUM        spect
PROBHD         5 mm PATXO 19F
PULPROG        zg30
TD             65536
SOLVENT        CDC13
NS             8
DS             2
SWH            10330.578 Hz
FIDRES         0.157632 Hz
AQ            3.1720407 sec
RG            143.7
DW            48.400 usec
DE            6.00 usec
TE            293.9 K
D1            1.00000000 sec
TD0           1
```

```
===== CHANNEL f1 =====
NUC1           1H
P1             13.70 usec
PL1           1.00 dB
SF01          500.1330885 MHz
SI            32768
SF            500.1300135 MHz
WDW            no
SSB            0
LB            0.00 Hz
GB            0
PC            1.00
```



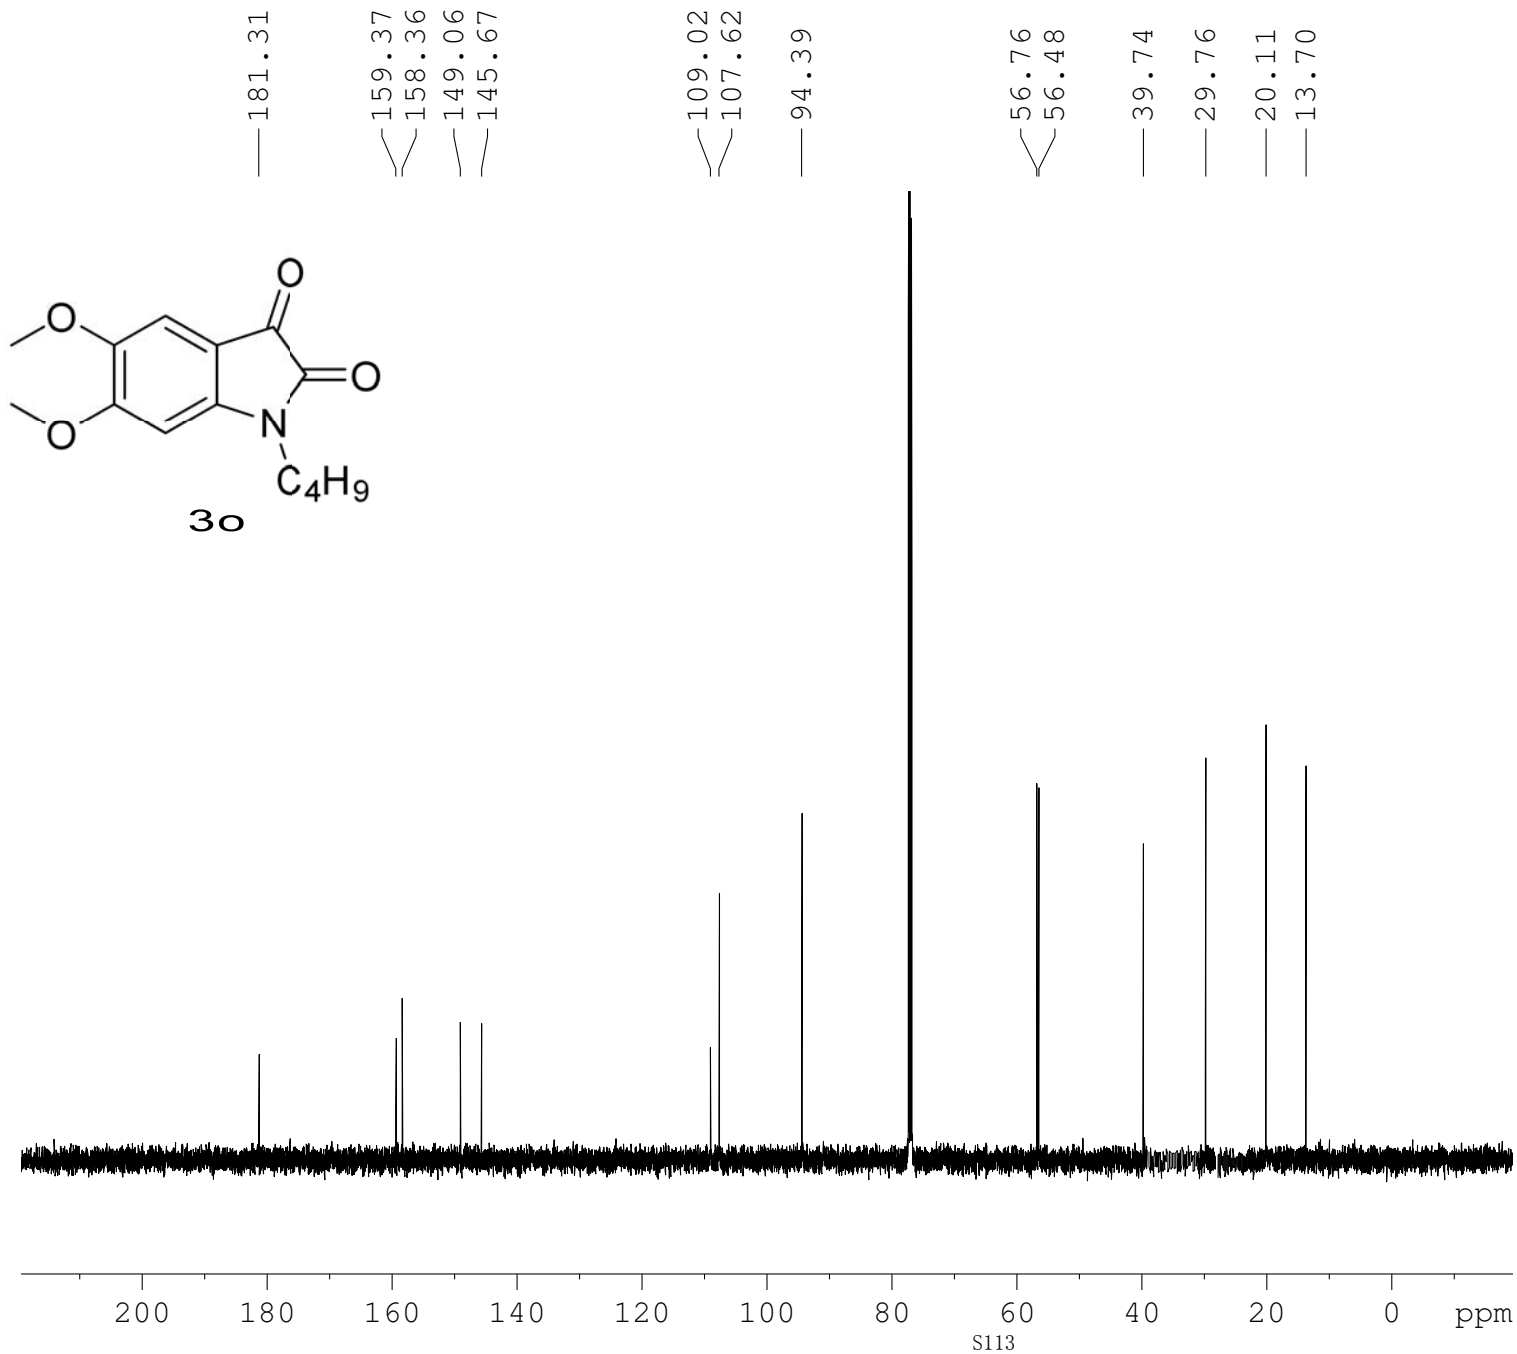

SUNJ-2-157  
C13CPD CDC13 D:\\ deng 58

```
NAME          XB20120326
EXPNO          3
PROCNO         1
Date_          20120326
Time           9.49
INSTRUM        spect
PROBHD         5 mm PATXO 19F
PULPROG        zgpg30
TD             65536
SOLVENT        CDC13
NS             128
DS             4
SWH            30030.029 Hz
FIDRES         0.458222 Hz
AQ             1.0912410 sec
RG             228.1
DW             16.650 usec
DE             6.00 usec
TE             295.2 K
D1             2.00000000 sec
d11            0.03000000 sec
DELTA          1.89999998 sec
TD0            1
```

```
===== CHANNEL f1 =====
NUC1           13C
P1             9.50 usec
PL1            -0.50 dB
SFO1           125.7703643 MHz
```

```
===== CHANNEL f2 =====
CPDPRG2        waltz16
NUC2           1H
PCPD2          80.00 usec
PL2            1.00 dB
PL12           16.33 dB
PL13           16.50 dB
SFO2           500.1320005 MHz
SI             32768
SF             125.7577890 MHz
WDW            EM
SSB            0
LB             1.00 Hz
GB             0
PC             1.40
```

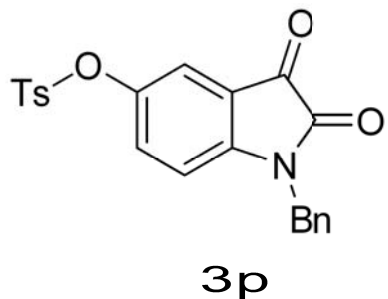

7.691  
7.674  
7.365  
7.352  
7.336  
7.319  
7.309  
7.293  
7.210  
7.206  
7.193  
7.189  
7.111  
7.107  
6.739  
6.721  
— 4.899

— 2.454

SUNJ-3-88  
PROTON CDC13 D:\\ deng 45

NAME xb20120419  
EXPNO 1  
PROCNO 1  
Date\_ 20120419  
Time\_ 9.42  
INSTRUM spect  
PROBHD 5 mm PATXO 19F  
PULPROG zg30  
TD 65536  
SOLVENT CDC13  
NS 16  
DS 2  
SWH 10330.578 Hz  
FIDRES 0.157632 Hz  
AQ 3.1720407 sec  
RG 161.3  
DW 48.400 usec  
DE 6.00 usec  
TE 294.1 K  
D1 1.00000000 sec  
TD0 1

===== CHANNEL f1 =====  
NUC1 1H  
P1 13.72 usec  
PL1 1.00 dB  
SFO1 500.1330885 MHz  
SI 32768  
SF 500.1300123 MHz  
WDW no  
SSB 0  
LB 0.00 Hz  
GB 0  
PC 1.00

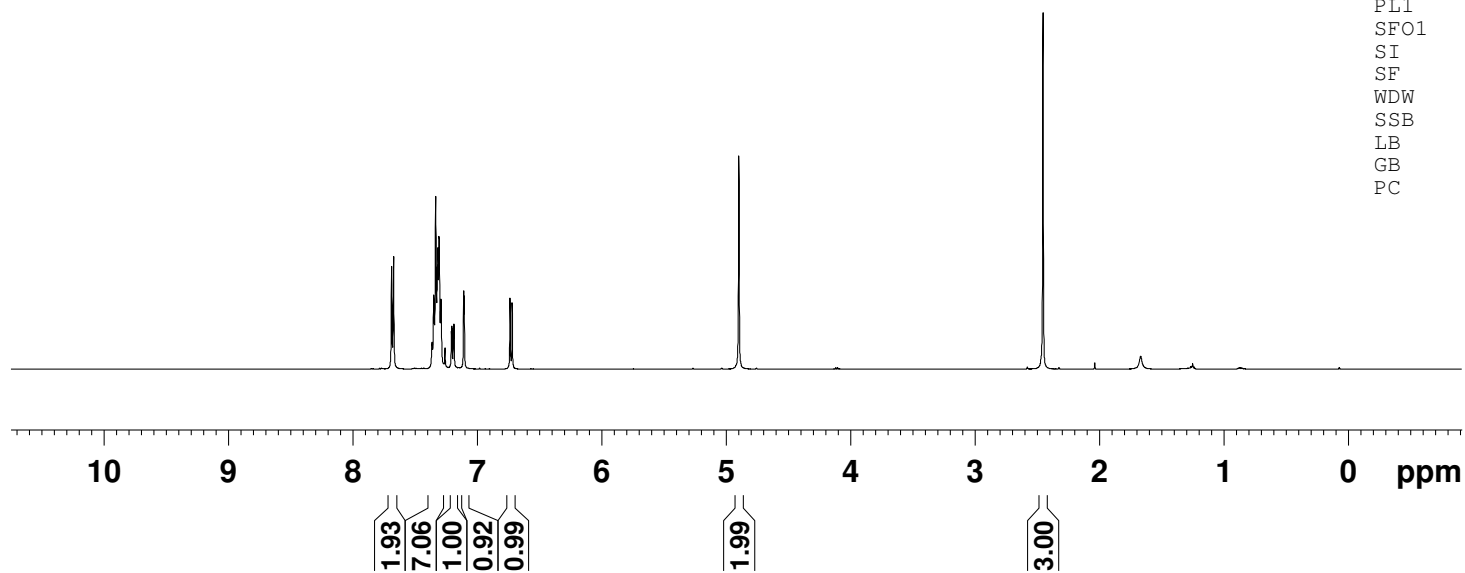

SUNJ-3-88  
C13CPD CDC13 D:\\ deng 45

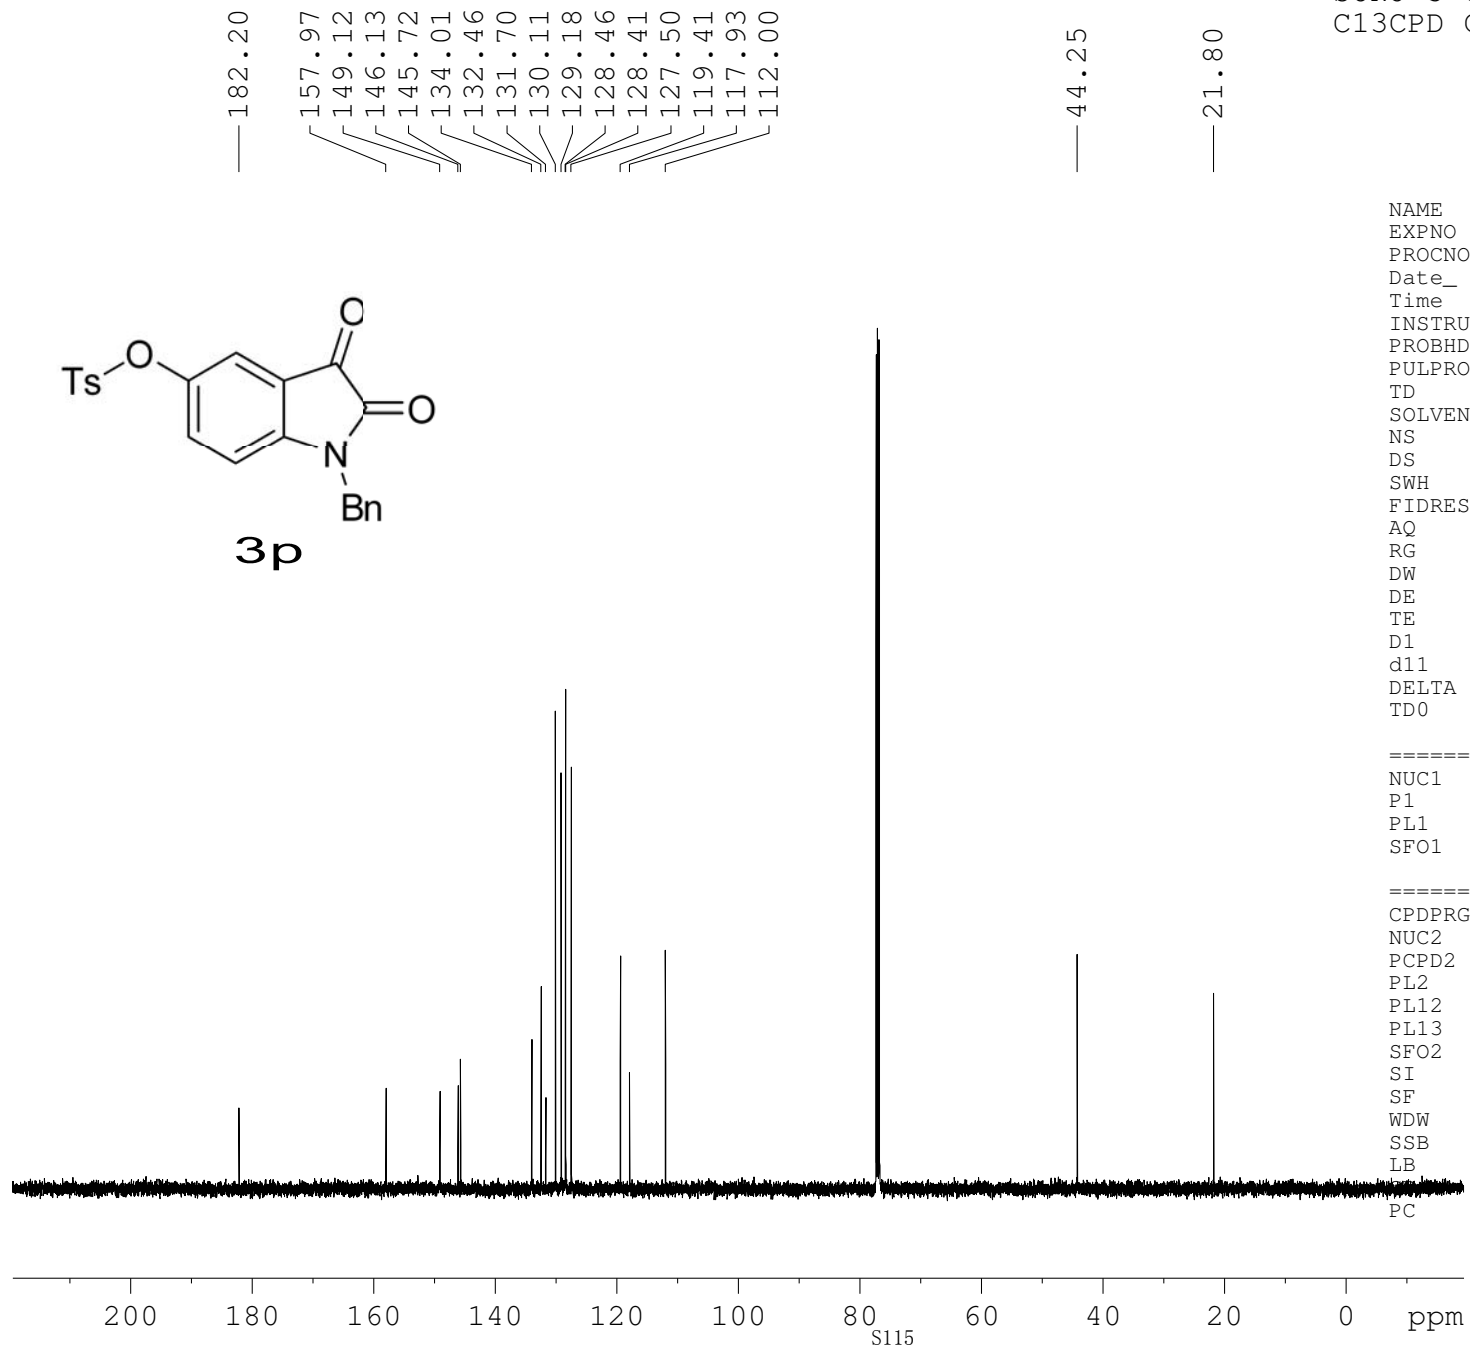

```
NAME          xb20120419
EXPNO         3
PROCNO        1
Date_         20120419
Time          10.00
INSTRUM       spect
PROBHD        5 mm PATXO 19F
PULPROG       zgpg30
TD            65536
SOLVENT       CDC13
NS            256
DS            4
SWH           30030.029 Hz
FIDRES        0.458222 Hz
AQ            1.0912410 sec
RG            362
DW            16.650 usec
DE            6.00 usec
TE            295.7 K
D1            2.00000000 sec
d11           0.03000000 sec
DELTA         1.89999998 sec
TD0           1
```

```
===== CHANNEL f1 =====
NUC1          13C
P1            9.50 usec
PL1           -0.50 dB
SFO1          125.7703643 MHz
```

```
===== CHANNEL f2 =====
CPDPRG2       waltz16
NUC2          1H
PCPD2         80.00 usec
PL2           1.00 dB
PL12          16.31 dB
PL13          16.50 dB
SFO2          500.1320005 MHz
SI            32768
SF            125.7577890 MHz
WDW           EM
SSB           0
LB            1.00 Hz
PC            1.40
```

7.705  
7.692  
7.691  
7.576  
7.561  
7.553  
7.545  
7.540  
7.538  
7.524  
7.522  
7.473  
7.458  
7.443  
7.429  
7.427  
7.412  
7.188  
7.173  
7.157  
6.906  
6.890

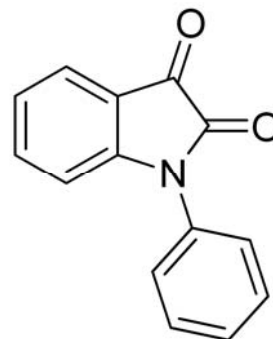

4a

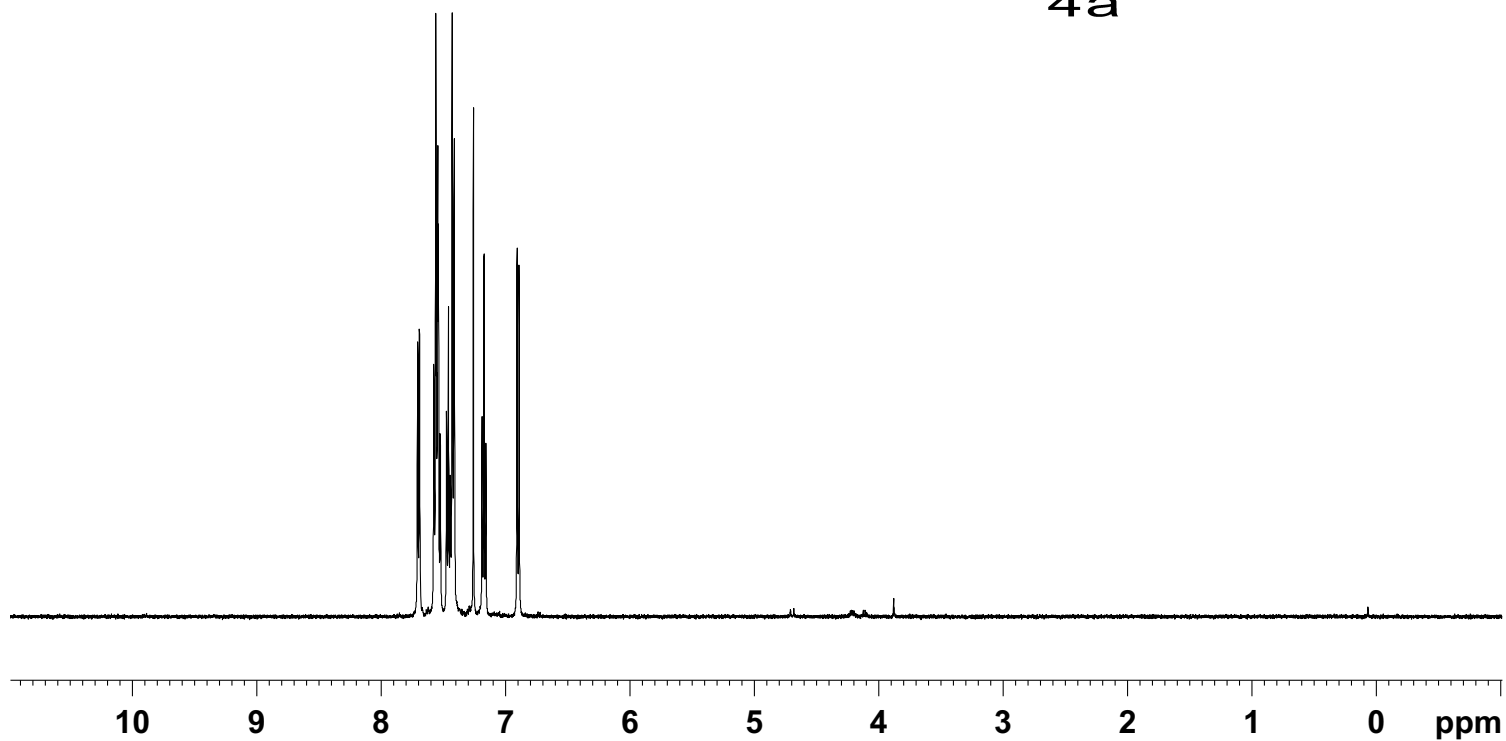

1.00  
3.05  
3.04  
1.03  
0.98

WSY-2-51  
PROTON CDCl3 D:\ deng 32

NAME XB20071009  
EXPNO 1  
PROCNO 1  
Date\_ 20071009  
Time\_ 9.55  
INSTRUM spect  
PROBHD 5 mm PATXO 19F  
PULPROG zg30  
TD 65536  
SOLVENT CDCl3  
NS 16  
DS 2  
SWH 10330.578 Hz  
FIDRES 0.157632 Hz  
AQ 3.1720407 sec  
RG 362  
DW 48.400 usec  
DE 6.00 usec  
TE 293.3 K  
D1 1.00000000 sec  
TD0 1

==== CHANNEL f1 =====  
NUC1 1H  
P1 14.50 usec  
PL1 2.00 dB  
SFO1 500.1330885 MHz  
SI 32768  
SF 500.1300142 MHz  
WDW no  
SSB 0  
LB 0.00 Hz  
GB 0  
PC 1.00

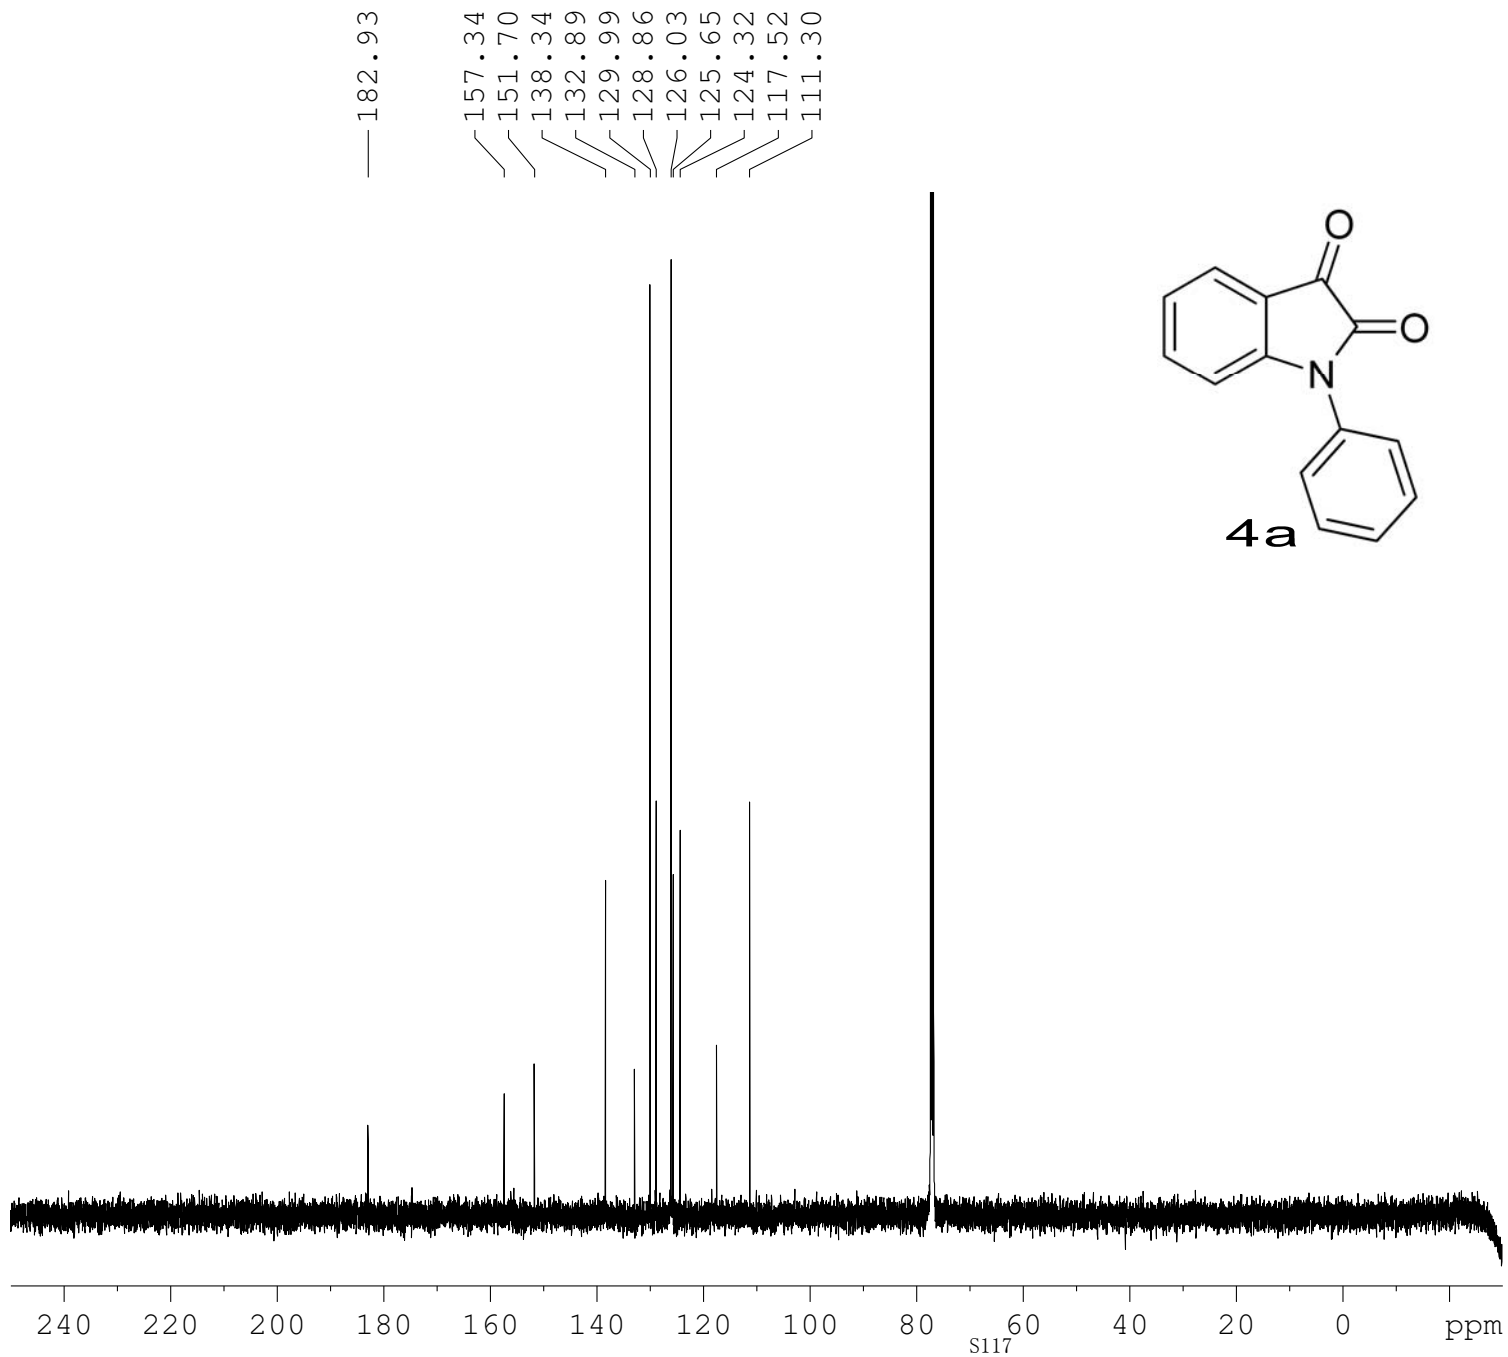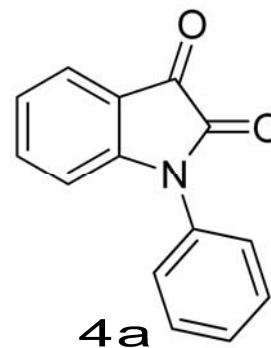

WSY-2-51  
C13CPD CDC13

```
NAME          XB20071010
EXPNO          1
PROCNO         1
Date_          20071010
Time           13.54
INSTRUM        spect
PROBHD         5 mm PATXO 19F
PULPROG        zgpg30
TD             65536
SOLVENT        CDC13
NS             2200
DS             4
SWH            35211.270 Hz
FIDRES         0.537281 Hz
AQ             0.9306754 sec
RG             512
DW             14.200 usec
DE             6.00 usec
TE             295.5 K
D1             2.00000000 sec
d11            0.03000000 sec
DELTA          1.89999998 sec
TD0            1
```

```
===== CHANNEL f1 =====
NUC1           13C
P1             9.50 usec
PL1            -0.50 dB
SFO1           125.7716224 MHz
```

```
===== CHANNEL f2 =====
CPDPRG2        waltz16
NUC2           1H
PCPD2          80.00 usec
PL2            2.00 dB
PL12           16.50 dB
PL13           16.50 dB
SFO2           500.132005 MHz
SI             32768
SF             125.7577890 MHz
WDW            EM
SSB            0
LB             1.00 Hz
GB             0
PC             1.40
```

WSY-2-121  
PROTON CDC13 D:\ deng 2

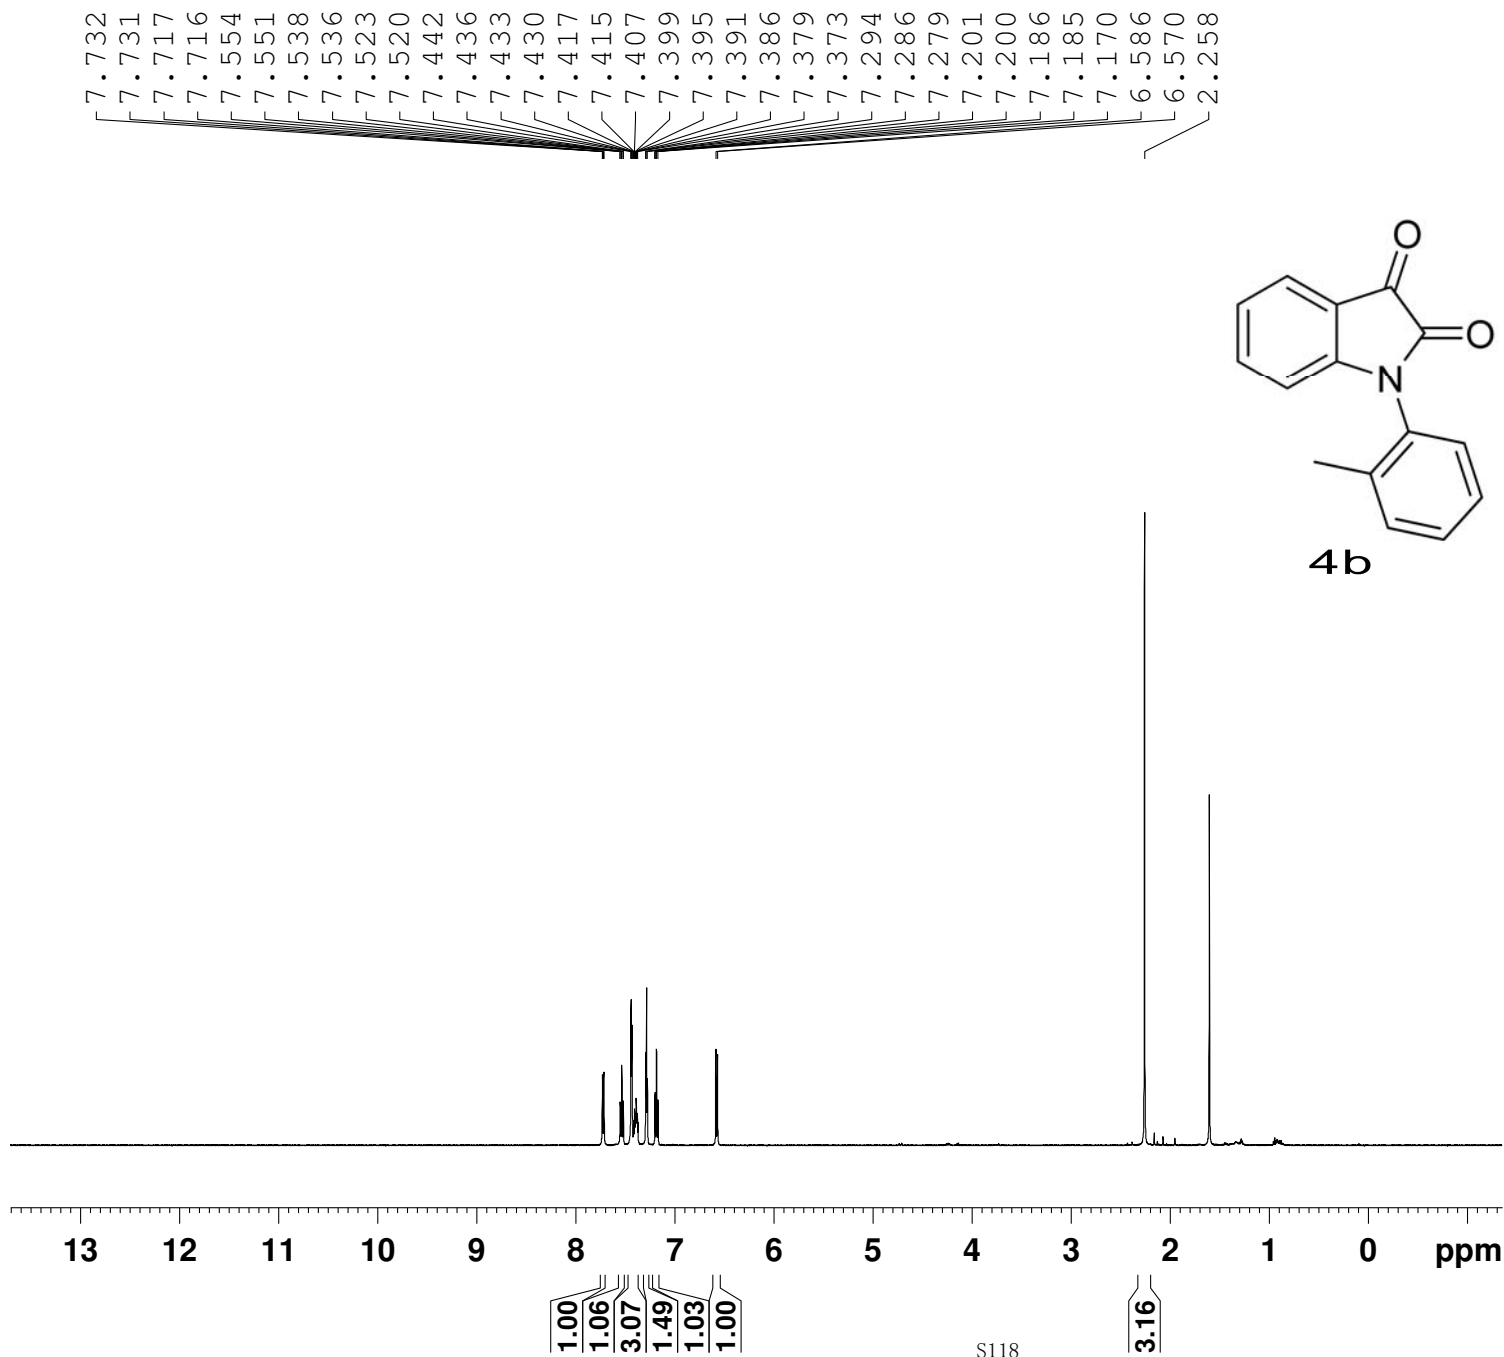

NAME XB20071205  
EXPNO 2  
PROCNO 1  
Date\_ 20071205  
Time 14.02  
INSTRUM spect  
PROBHD 5 mm PATXO 19F  
PULPROG zg30  
TD 65536  
SOLVENT CDC13  
NS 16  
DS 2  
SWH 10330.578 Hz  
FIDRES 0.157632 Hz  
AQ 3.1720407 sec  
RG 362  
DW 48.400 usec  
DE 6.00 usec  
TE 293.8 K  
D1 1.00000000 sec  
TD0 1

===== CHANNEL f1 =====  
NUC1 1H  
P1 14.50 usec  
PL1 2.00 dB  
SFO1 500.1330885 MHz  
SI 32768  
SF 500.1300000 MHz  
WDW no  
SSB 0  
LB 0.00 Hz  
GB 0  
PC 1.00

WSY-2-121  
C13CPD CDC13 D:\ deng 43

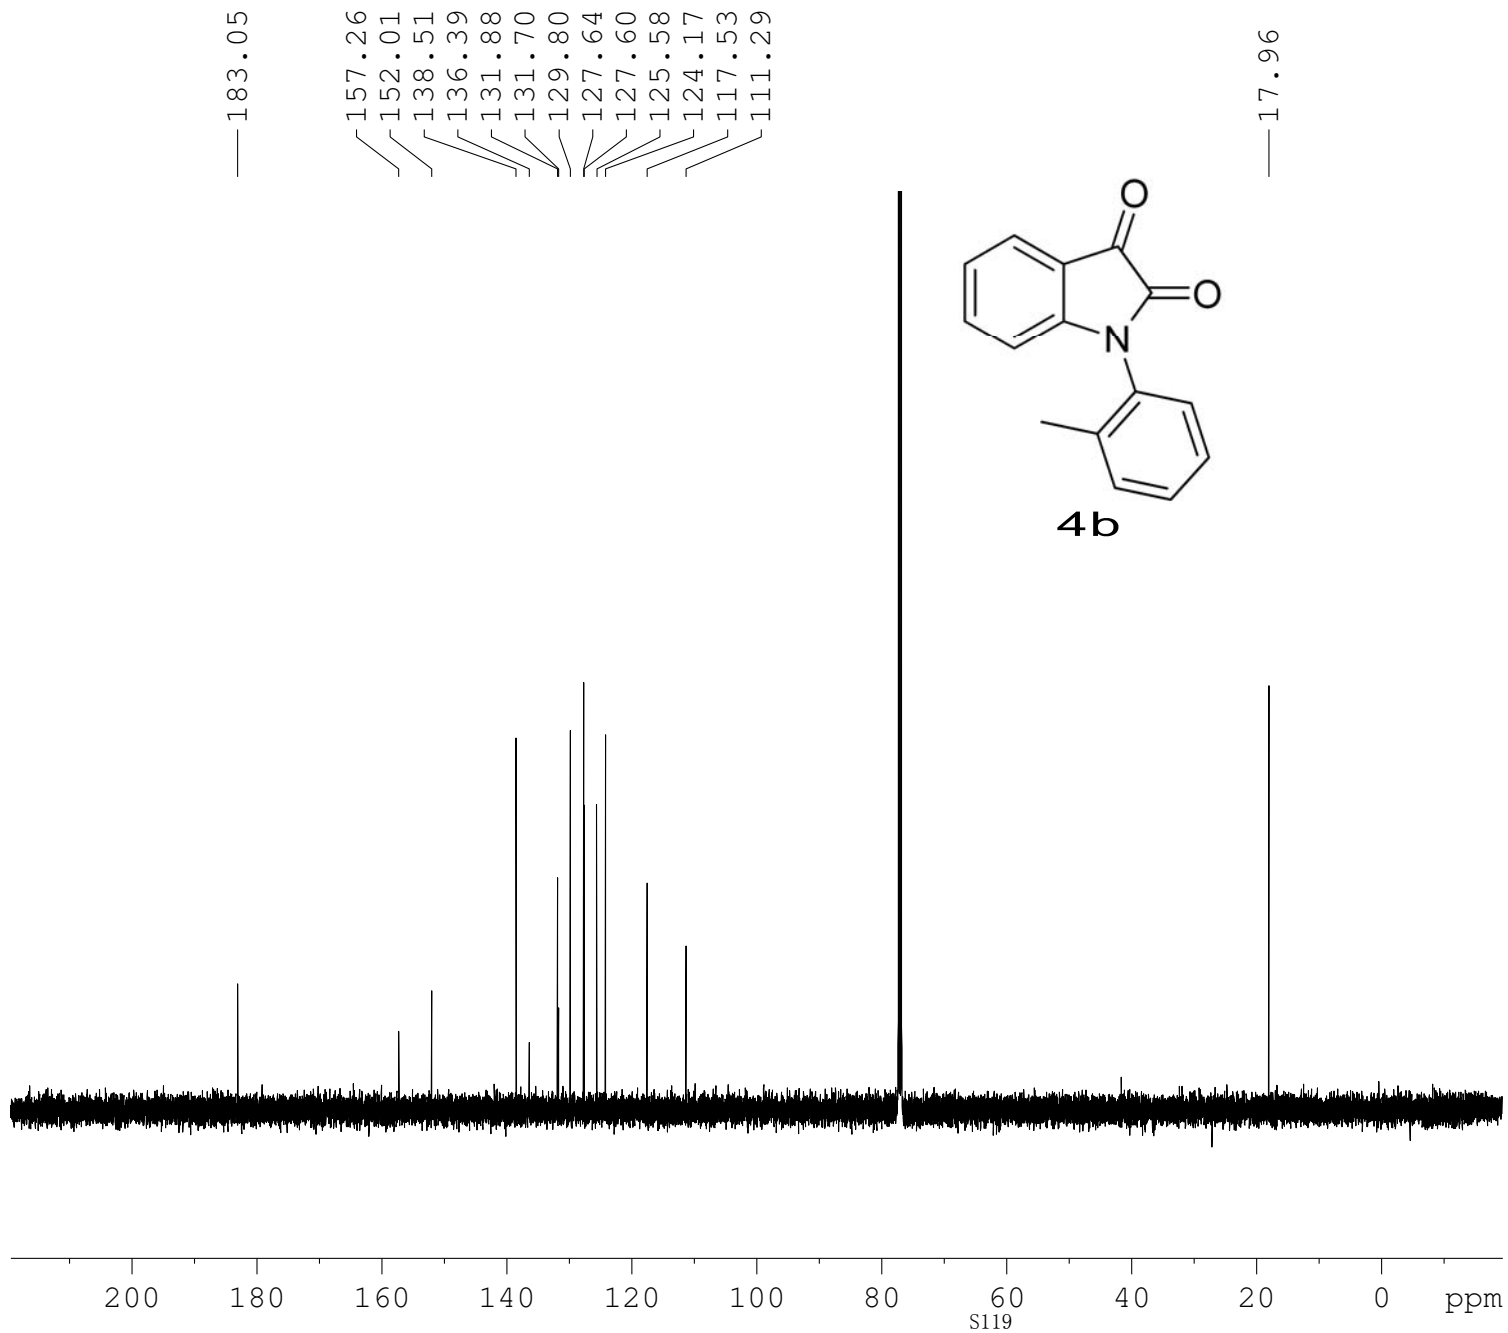

```
NAME          XB20071206
EXPNO         31
PROCNO        1
Date_         20071206
Time          20.32
INSTRUM       spect
PROBHD        5 mm PATXO 19F
PULPROG       zgpg30
TD            65536
SOLVENT       CDC13
NS            2048
DS            4
SWH           30030.029 Hz
FIDRES        0.458222 Hz
AQ            1.0912410 sec
RG            645.1
DW            16.650 usec
DE            6.00 usec
TE            295.6 K
D1            2.00000000 sec
d11           0.03000000 sec
DELTA         1.89999998 sec
TD0           1
```

```
===== CHANNEL f1 =====
NUC1          13C
P1            9.50 usec
PL1           -0.50 dB
SFO1          125.7703643 MHz
```

```
===== CHANNEL f2 =====
CPDPRG2       waltz16
NUC2          1H
PCPD2         80.00 usec
PL2           2.00 dB
PL12          16.50 dB
PL13          16.50 dB
SFO2          500.1320005 MHz
SI            32768
SF            125.7577890 MHz
WDW           no
SSB           0
LB            0.00 Hz
GB            0
PC            1.40
```

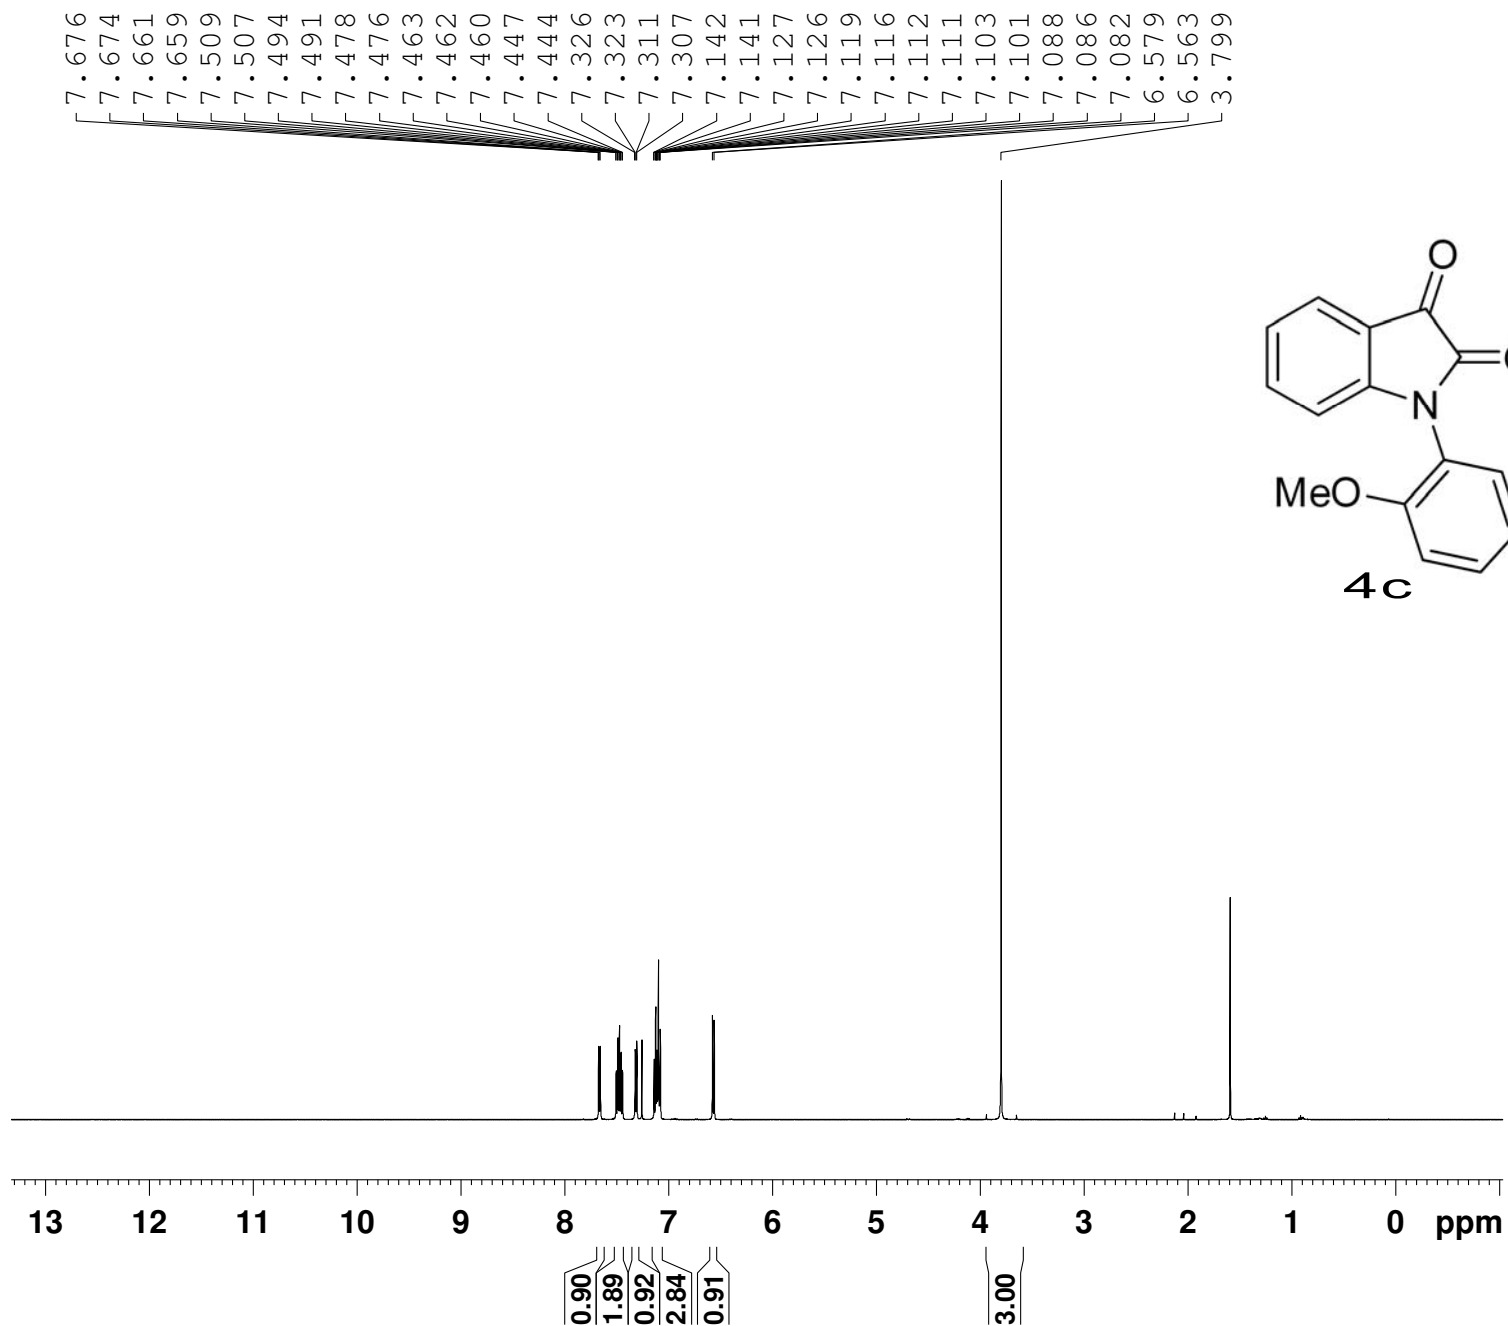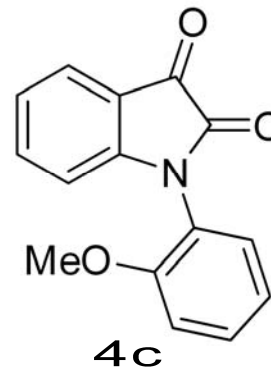

WSY-2-157-7  
PROTON CDCl3 D:\ deng 3

NAME XB20080222  
EXPNO 2  
PROCNO 1  
Date\_ 20080222  
Time 13.55  
INSTRUM spect  
PROBHD 5 mm PATXO 19F  
PULPROG zg30  
TD 65536  
SOLVENT CDCl3  
NS 16  
DS 2  
SWH 10330.578 Hz  
FIDRES 0.157632 Hz  
AQ 3.1720407 sec  
RG 362  
DW 48.400 usec  
DE 6.00 usec  
TE 295.0 K  
D1 1.0000000 sec  
TD0 1

==== CHANNEL f1 =====  
NUC1 1H  
P1 14.50 usec  
PL1 2.00 dB  
SFO1 500.1330885 MHz  
SI 32768  
SF 500.1300133 MHz  
WDW no  
SSB 0  
LB 0.00 Hz  
GB 0  
PC 1.00



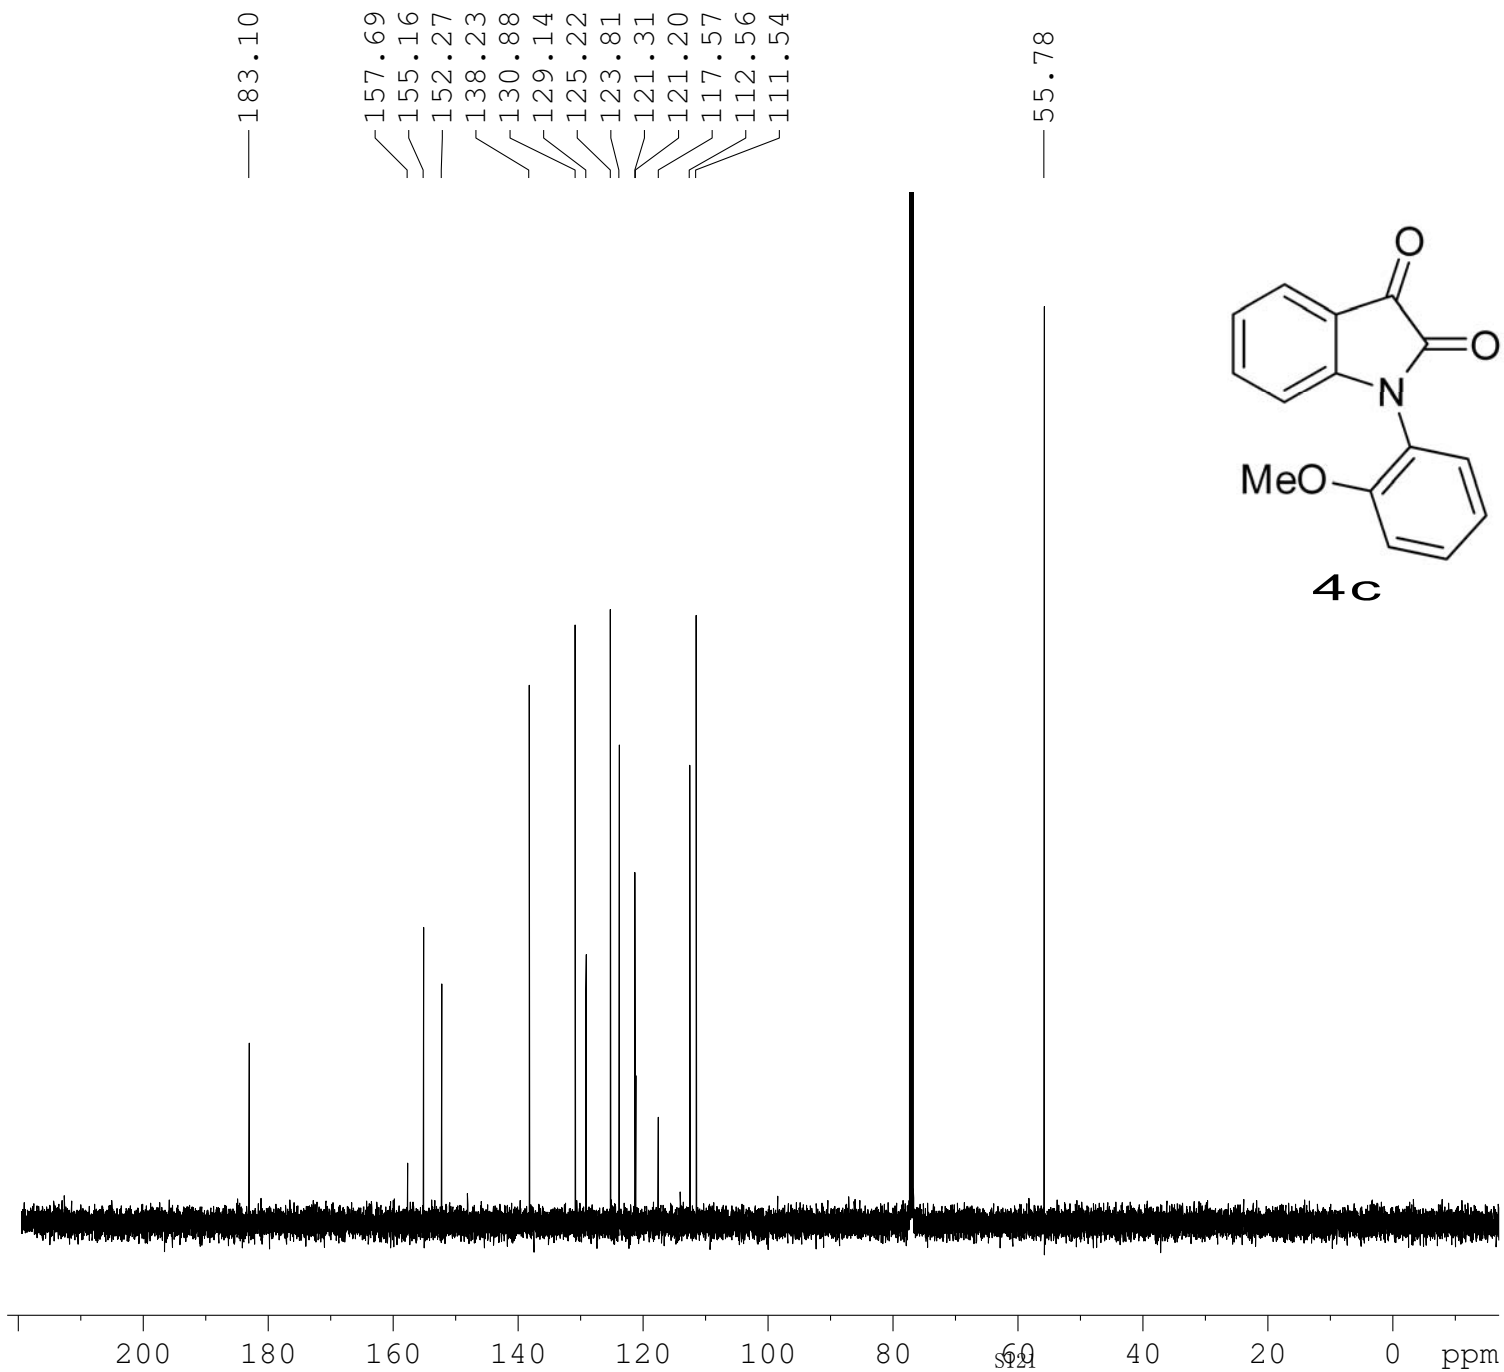

WSY-2-157-7  
C13CPD CDC13 D:\\ deng 4

|         |                |
|---------|----------------|
| NAME    | XB20080222     |
| EXPNO   | 6              |
| PROCNO  | 1              |
| Date_   | 20080222       |
| Time    | 16.31          |
| INSTRUM | spect          |
| PROBHD  | 5 mm PATXO 19F |
| PULPROG | zgpg30         |
| TD      | 65536          |
| SOLVENT | CDC13          |
| NS      | 1024           |
| DS      | 4              |
| SWH     | 30030.029 Hz   |
| FIDRES  | 0.458222 Hz    |
| AQ      | 1.0912410 sec  |
| RG      | 322.5          |
| DW      | 16.650 usec    |
| DE      | 6.00 usec      |
| TE      | 296.4 K        |
| D1      | 2.00000000 sec |
| d11     | 0.03000000 sec |
| DELTA   | 1.89999998 sec |
| TD0     | 1              |

==== CHANNEL f1 =====  
NUC1 13C  
P1 9.50 usec  
PL1 -0.50 dB  
SFO1 125.7703643 MHz

==== CHANNEL f2 =====  
CPDPRG2 waltz16  
NUC2 1H  
PCPD2 80.00 usec  
PL2 2.00 dB  
PL12 16.50 dB  
PL13 16.50 dB  
SFO2 500.1320005 MHz  
SI 32768  
SF 125.7577890 MHz  
WDW no  
SSB 0  
LB 0.00 Hz  
GB 0  
PC 1.40

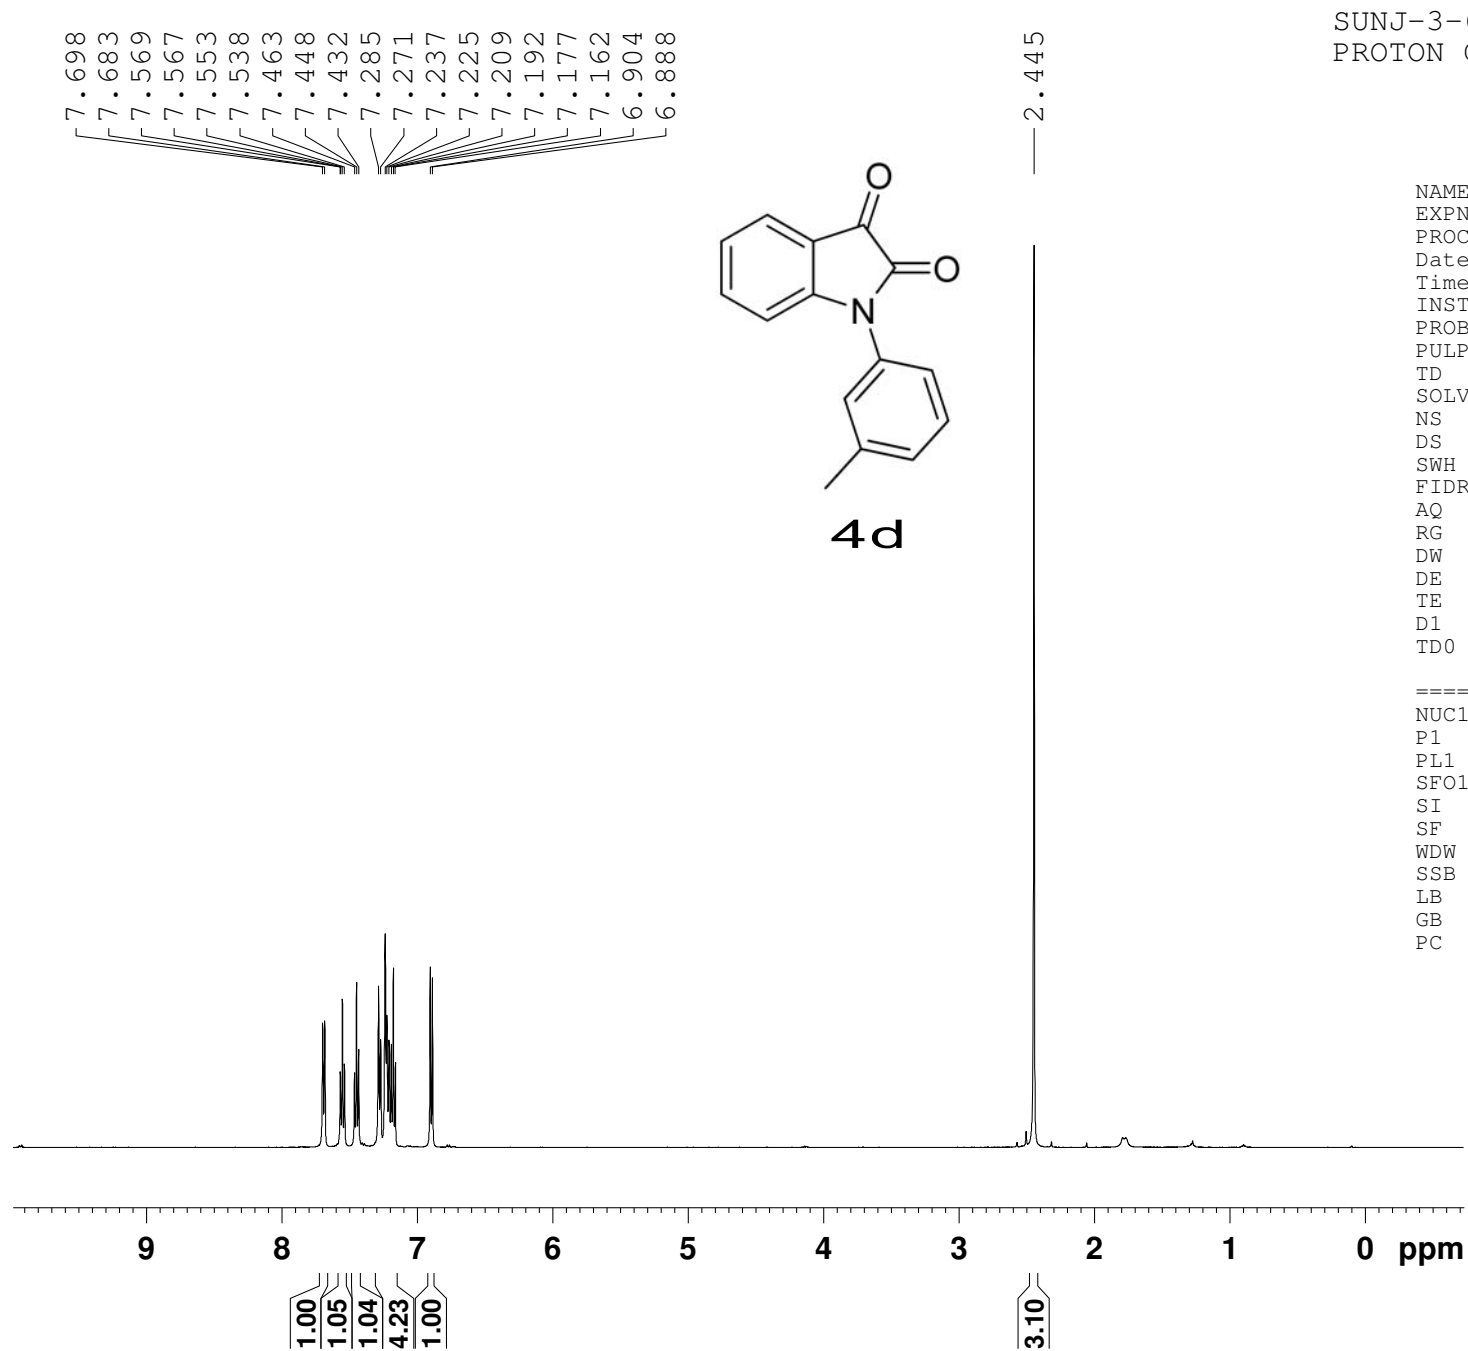

SUNJ-3-61  
PROTON CDC13 D:\\ deng 28

NAME XB20120613  
EXPNO 1  
PROCNO 1  
Date\_ 20120613  
Time 12.40  
INSTRUM spect  
PROBHD 5 mm PATXO 19F  
PULPROG zg30  
TD 65536  
SOLVENT CDC13  
NS 16  
DS 2  
SWH 10330.578 Hz  
FIDRES 0.157632 Hz  
AQ 3.1720407 sec  
RG 128  
DW 48.400 usec  
DE 6.00 usec  
TE 296.2 K  
D1 1.00000000 sec  
TD0 1

===== CHANNEL f1 =====  
NUC1 1H  
P1 13.72 usec  
PL1 1.00 dB  
SFO1 500.1330885 MHz  
SI 32768  
SF 500.1300000 MHz  
WDW no  
SSB 0  
LB 0.00 Hz  
GB 0  
PC 1.00

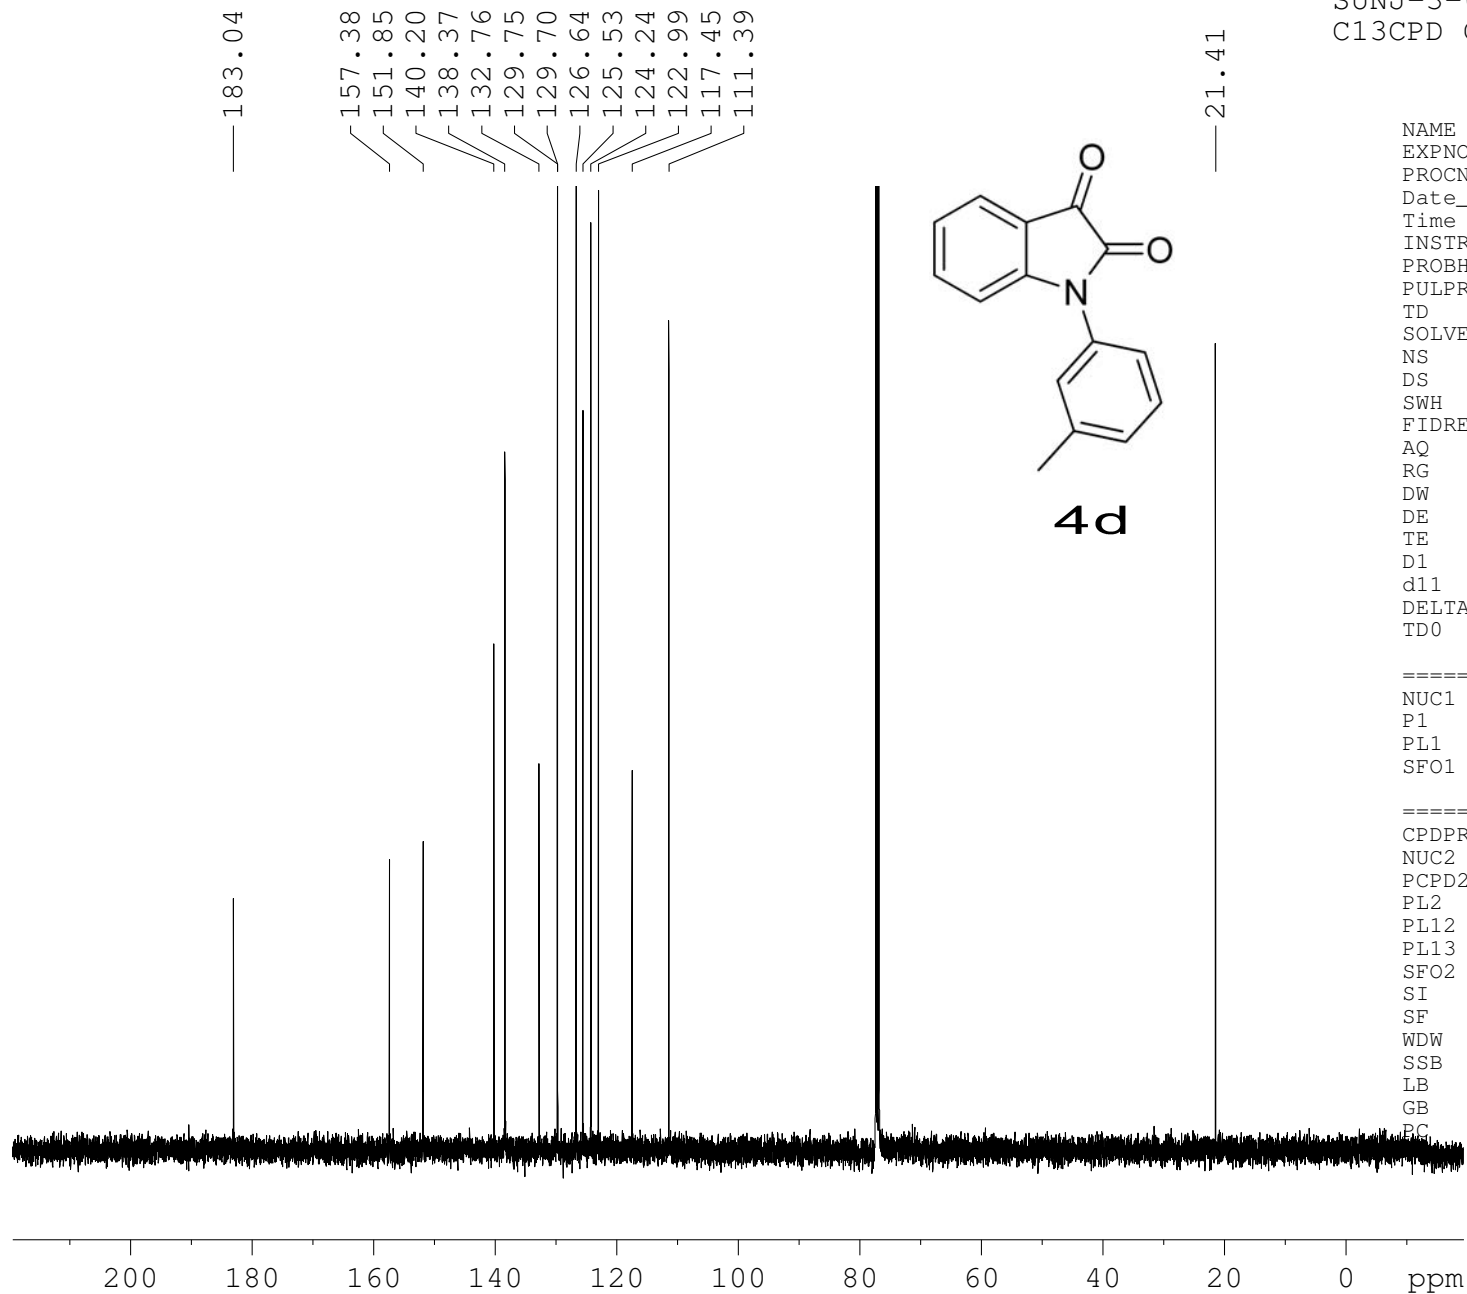

SUNJ-3-61  
C13CPD CDC13 D:\\ deng 28

```
NAME          XB20120613
EXPNO         3
PROCNO        1
Date_         20120613
Time          12.57
INSTRUM       spect
PROBHD        5 mm PATXO 19F
PULPROG       zgpg30
TD            65536
SOLVENT       CDC13
NS            256
DS            4
SWH           30030.029 Hz
FIDRES        0.458222 Hz
AQ            1.0912410 sec
RG            1290.2
DW            16.650 usec
DE            6.00 usec
TE            297.7 K
D1            2.00000000 sec
d11           0.03000000 sec
DELTA         1.89999998 sec
TD0           1
```

```
===== CHANNEL f1 =====
NUC1          13C
P1            9.50 usec
PL1           -0.50 dB
SFO1          125.7703643 MHz
```

```
===== CHANNEL f2 =====
CPDPRG2       waltz16
NUC2          1H
PCPD2         80.00 usec
PL2           1.00 dB
PL12          16.31 dB
PL13          16.50 dB
SFO2          500.1320005 MHz
SI            32768
SF            125.7577890 MHz
WDW           EM
SSB           0
LB            1.00 Hz
GB            0
PC            1.40
```

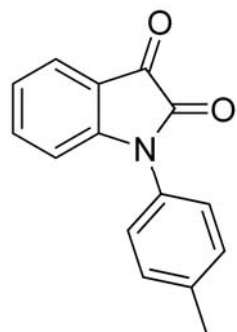

4e

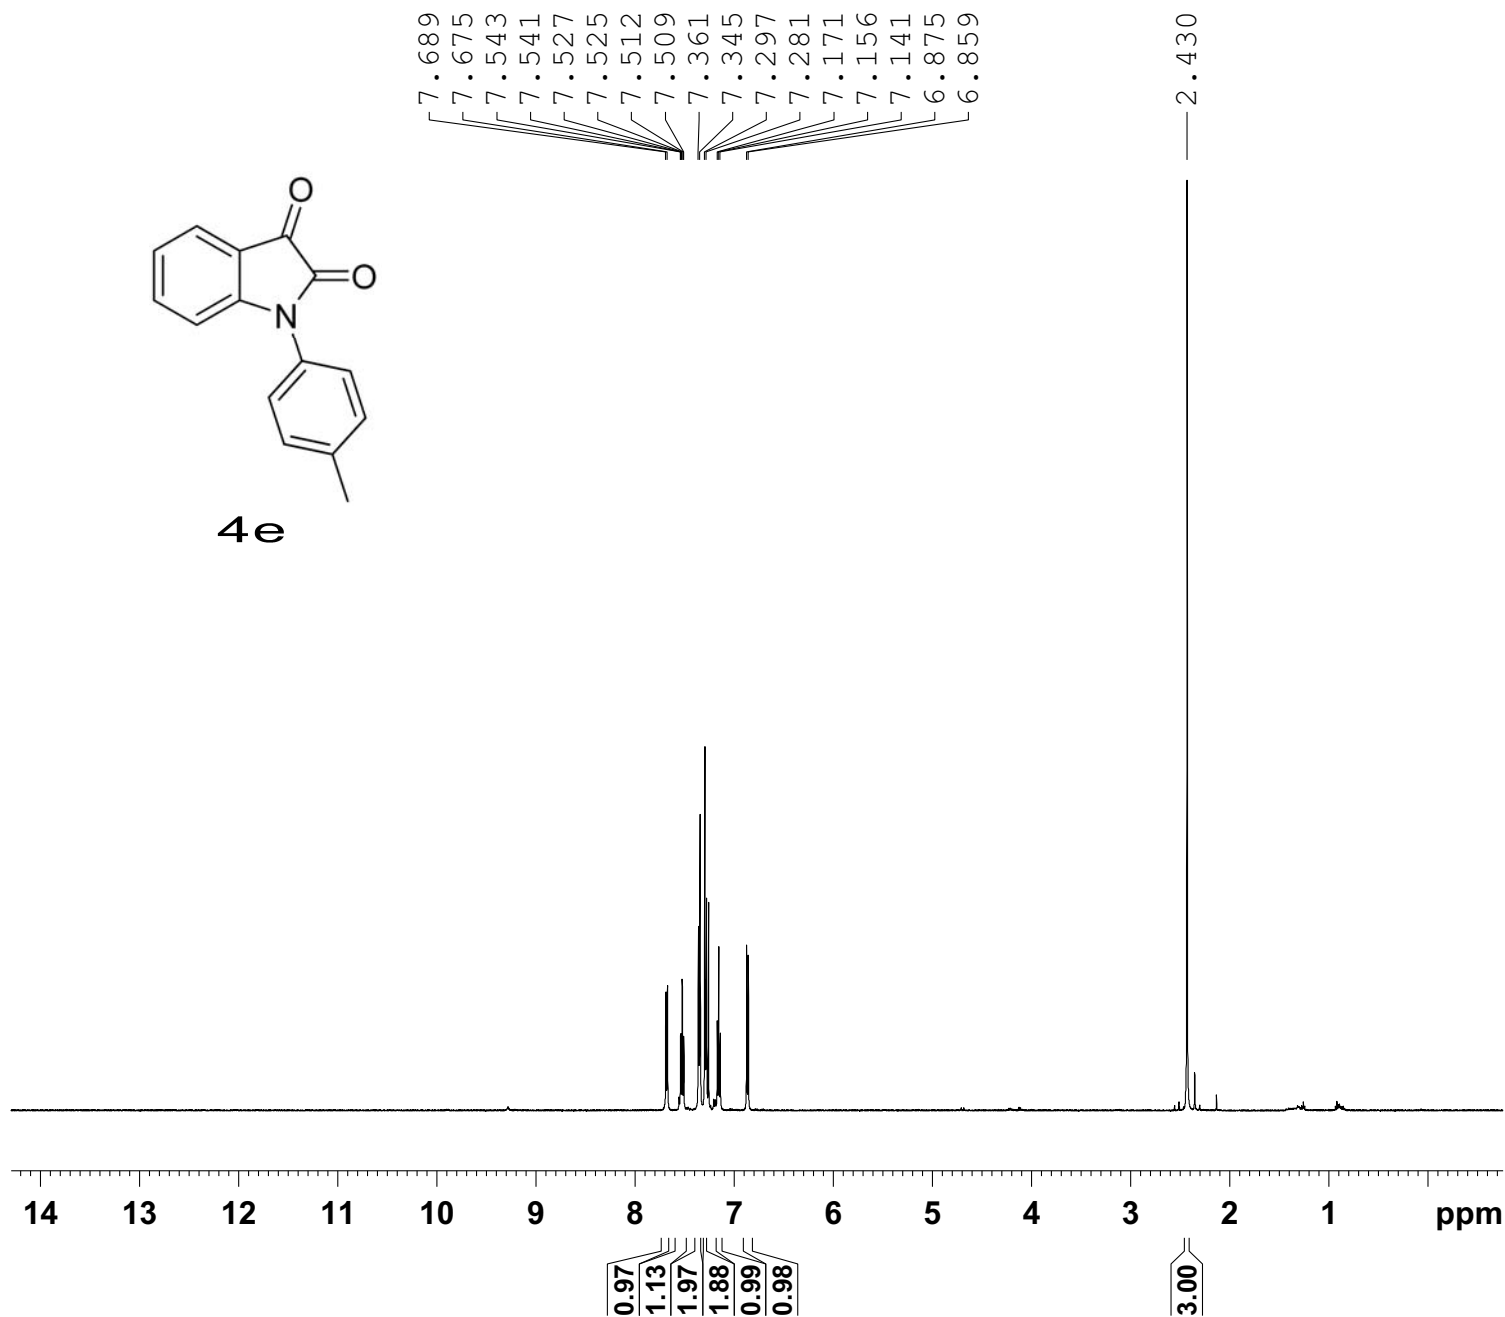

WSY-2-138  
PROTON CDC13 D:\\ deng 21

```
NAME          XB20071219
EXPNO          4
PROCNO         1
Date_          20071219
Time           16.39
INSTRUM        spect
PROBHD         5 mm PABBO BB-
PULPROG        zg30
TD             65536
SOLVENT        CDC13
NS             16
DS             2
SWH            10330.578 Hz
FIDRES         0.157632 Hz
AQ             3.1720407 sec
RG             406.4
DW             48.400 usec
DE             6.00 usec
TE             293.4 K
D1             1.00000000 sec
TDO            1
```

```
===== CHANNEL f1 =====
NUC1           1H
P1             14.50 usec
PL1            3.50 dB
SFO1           500.1330885 MHz
SI             32768
SF             500.1300132 MHz
WDW            no
SSB            0
LB             0.00 Hz
GB             0
PC             1.00
```

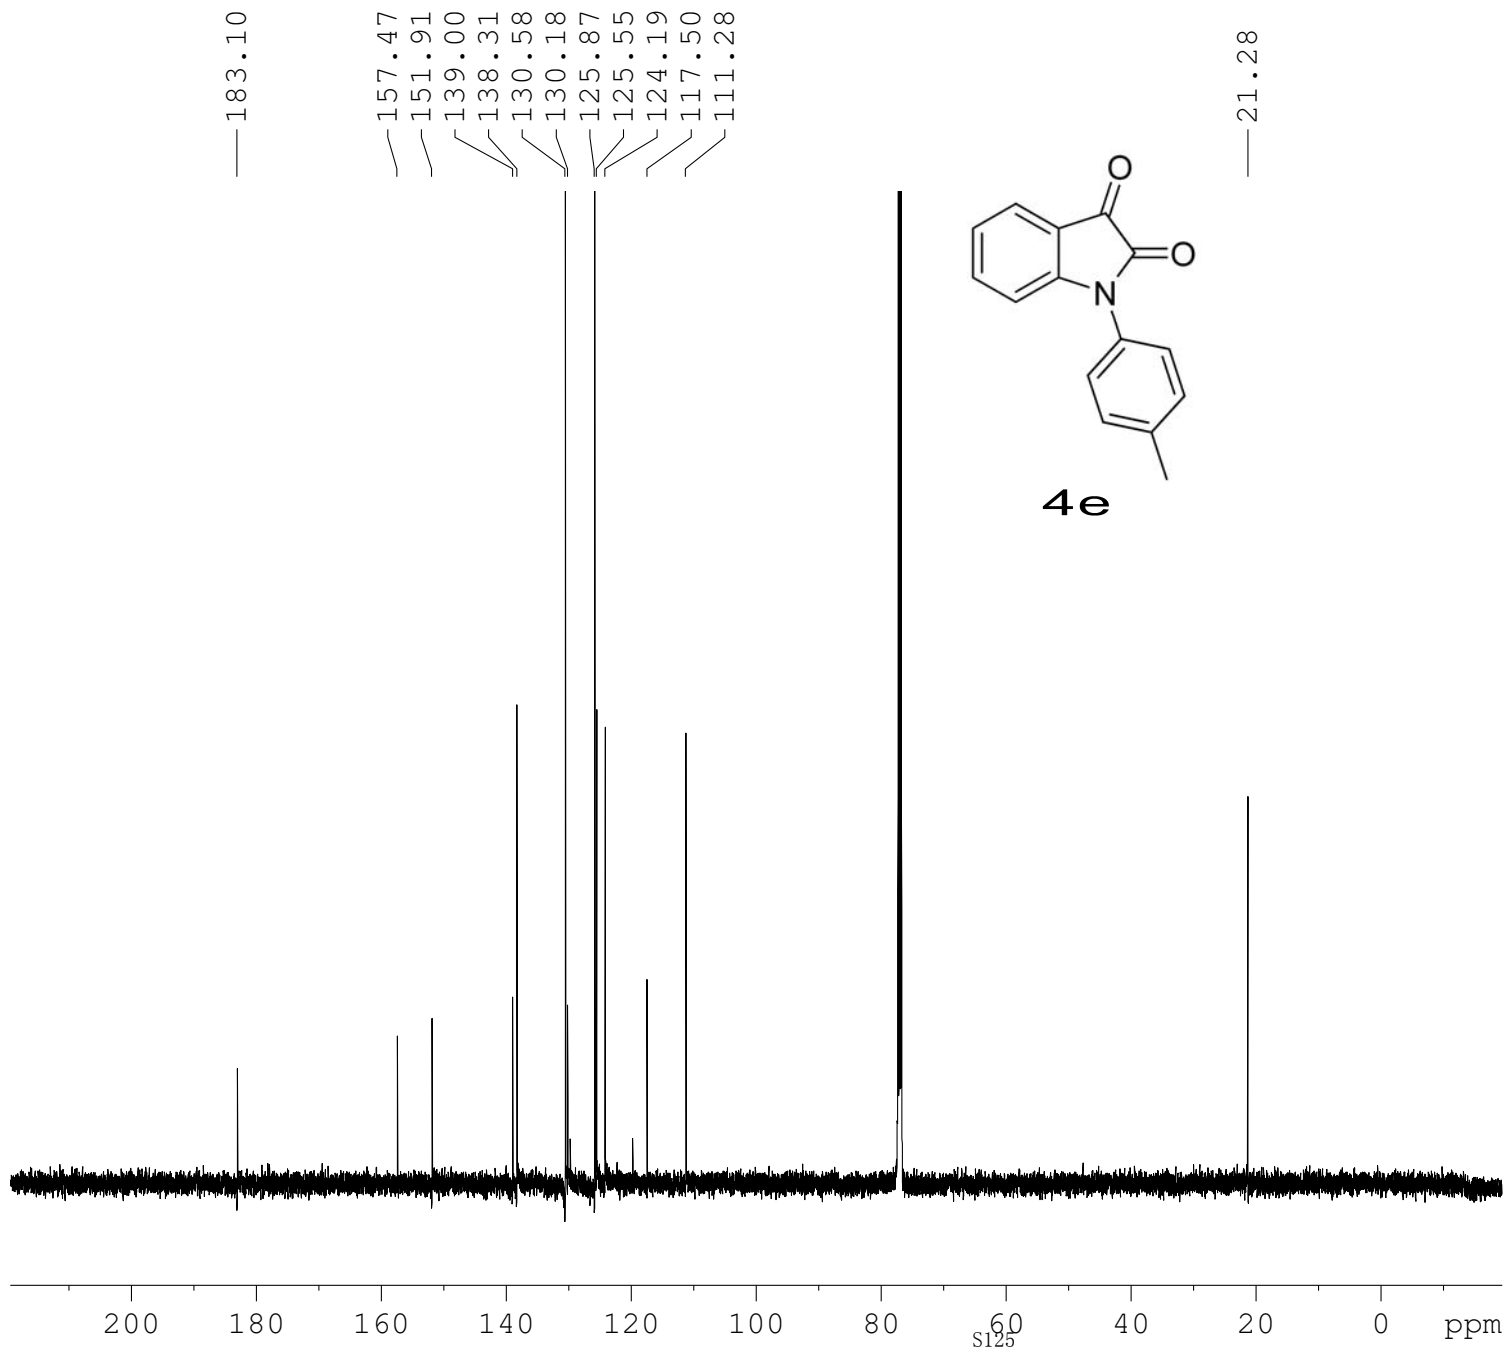

WSY-2-138  
C13CPD CDC13 D:\\ deng 3'

```
NAME          XB20071219
EXPNO          8
PROCNO         1
Date_          20071220
Time           4.01
INSTRUM        spect
PROBHD         5 mm PABBO BB-
PULPROG        zgpg30
TD             65536
SOLVENT        CDC13
NS             2048
DS             4
SWH            30030.029 Hz
FIDRES         0.458222 Hz
AQ            1.0912410 sec
RG            228.1
DW            16.650 usec
DE            6.00 usec
TE            295.9 K
D1            2.00000000 sec
TD0           1
```

```
===== CHANNEL f1 =====
NUC1           13C
P1             9.20 usec
PL1            1.00 dB
SFO1          125.7703643 MHz
SI            32768
SF            125.7577890 MHz
WDW            EM
SSB            0
LB            1.00 Hz
GB            0
PC            1.40
```

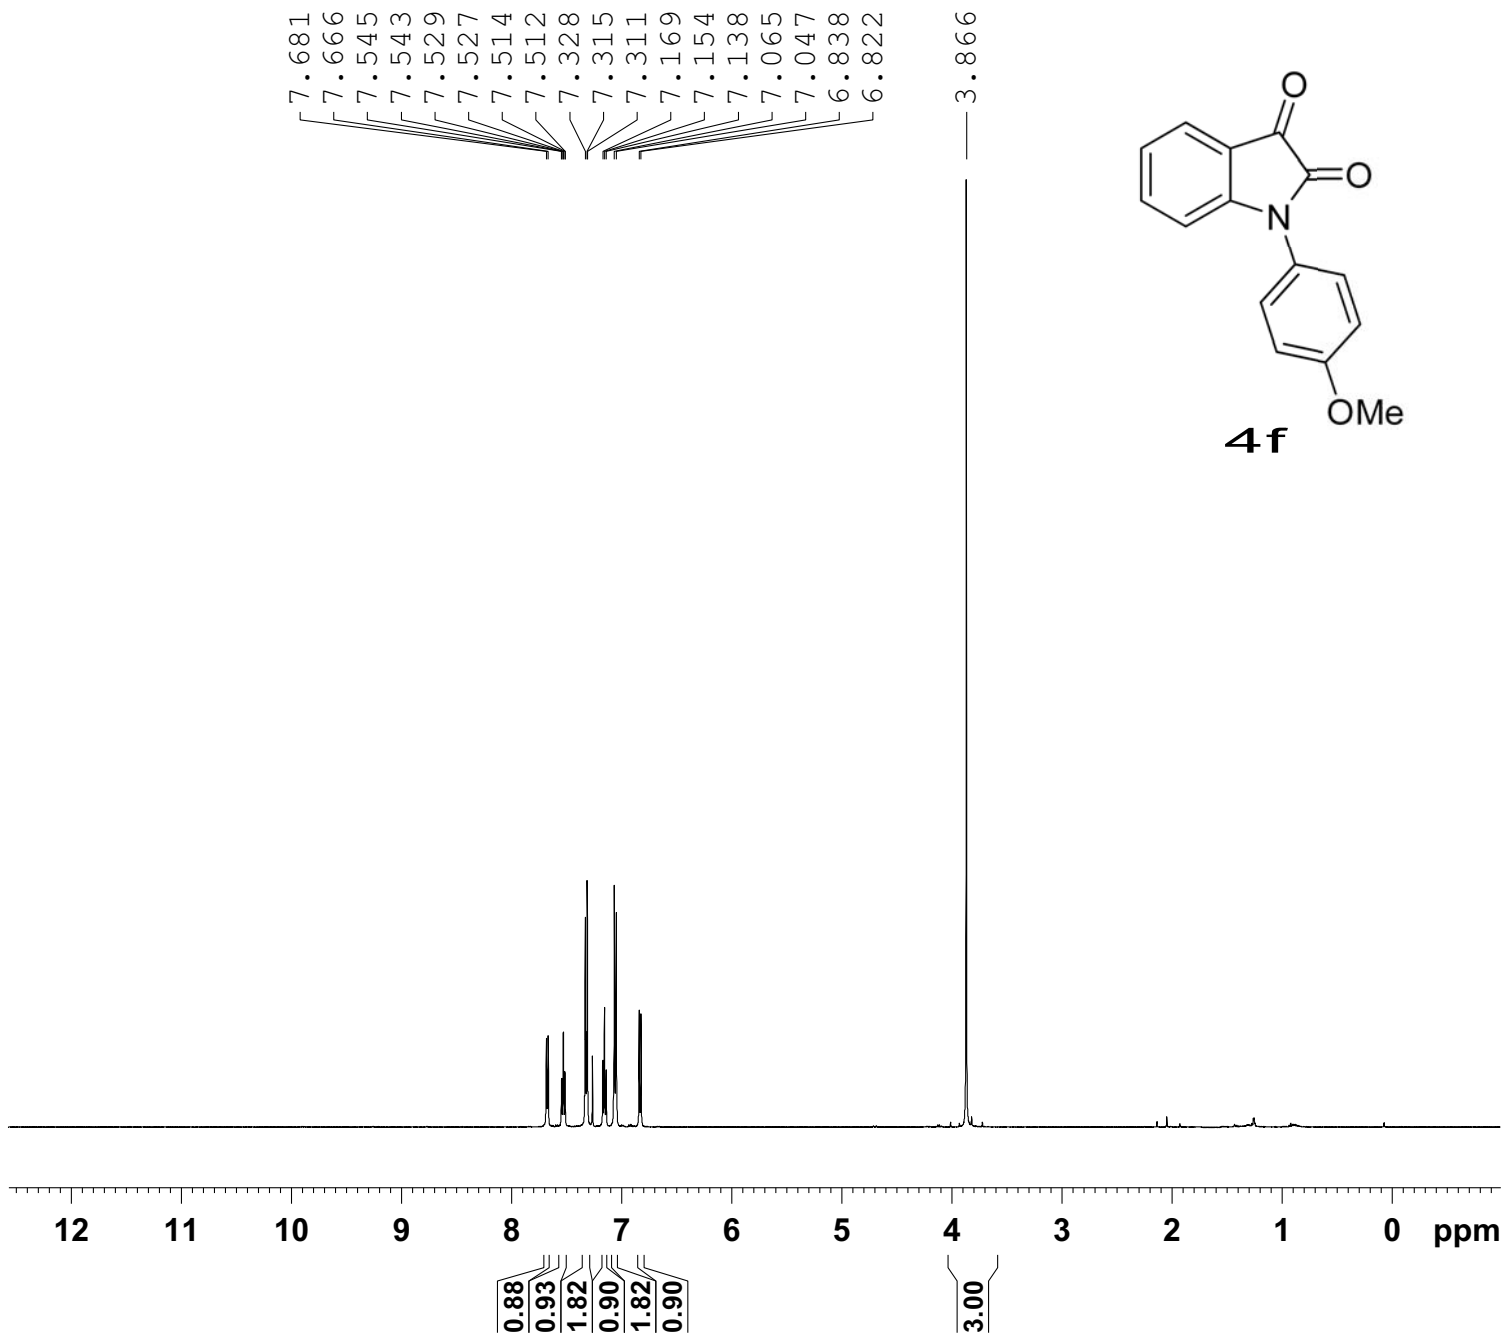

WSY-2-116  
PROTON CDC13 D:\\ deng 33

NAME XB20071203  
EXPNO 1  
PROCNO 1  
Date\_ 20071203  
Time\_ 10.15  
INSTRUM spect  
PROBHD 5 mm PATXO 19F  
PULPROG zg30  
TD 65536  
SOLVENT CDC13  
NS 16  
DS 2  
SWH 10330.578 Hz  
FIDRES 0.157632 Hz  
AQ 3.1720407 sec  
RG 287.4  
DW 48.400 usec  
DE 6.00 usec  
TE 293.6 K  
D1 1.00000000 sec  
TD0 1

===== CHANNEL f1 =====  
NUC1 1H  
P1 14.50 usec  
PL1 2.00 dB  
SFO1 500.1330885 MHz  
SI 32768  
SF 500.1300116 MHz  
WDW no  
SSB 0  
LB 0.00 Hz  
GB 0  
PC 1.00

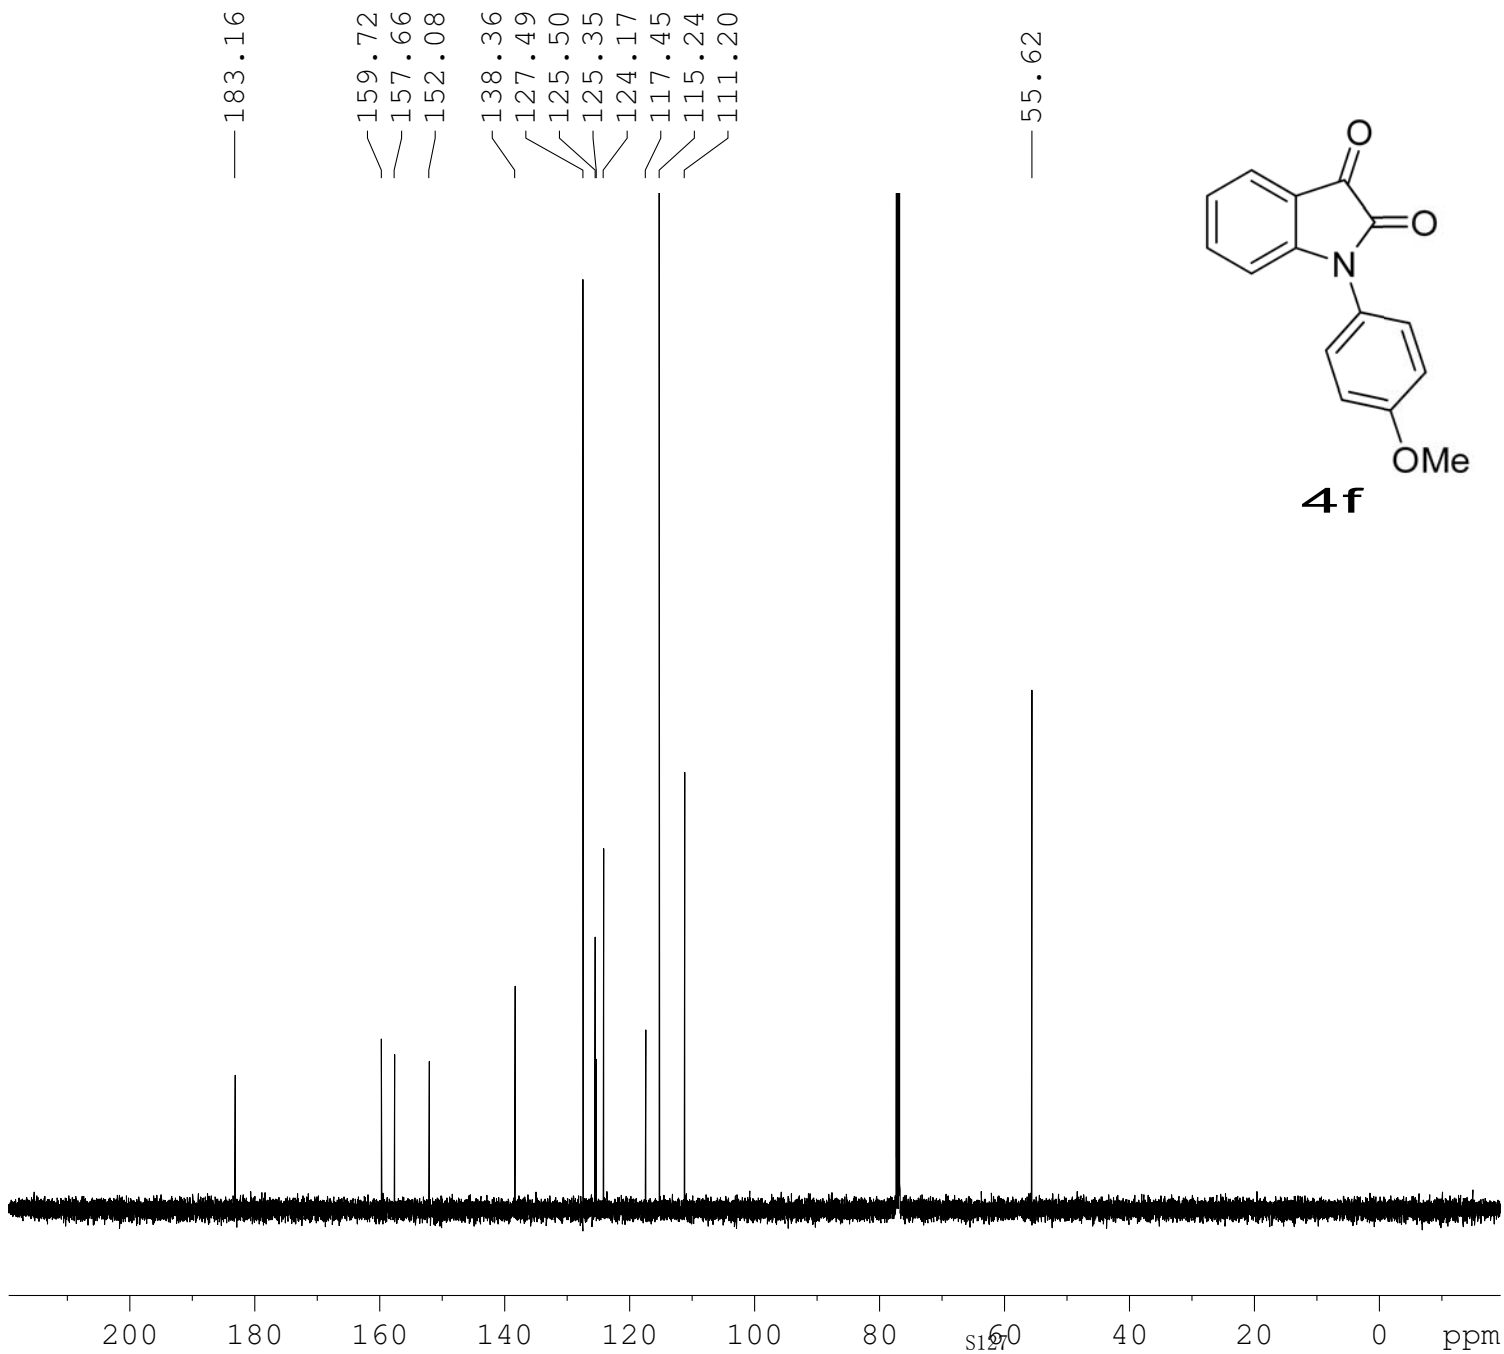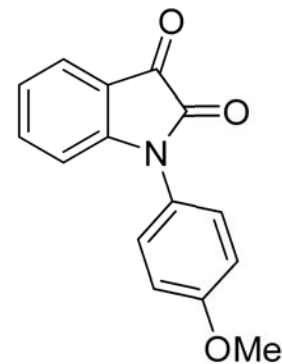

WSY-2-116  
C13CPD CDC13

NAME XB20071203  
EXPNO 2  
PROCNO 1  
Date\_ 20071203  
Time 22.20  
INSTRUM spect  
PROBHD 5 mm PATXO 19F  
PULPROG zgpg30  
TD 65536  
SOLVENT CDC13  
NS 1024  
DS 4  
SWH 30030.029 Hz  
FIDRES 0.458222 Hz  
AQ 1.0912410 sec  
RG 322.5  
DW 16.650 usec  
DE 6.00 usec  
TE 295.4 K  
D1 2.00000000 sec  
d11 0.03000000 sec  
DELTA 1.89999998 sec  
TD0 1

==== CHANNEL f1 =====  
NUC1 13C  
P1 9.50 usec  
PL1 -0.50 dB  
SFO1 125.7703643 MHz

==== CHANNEL f2 =====  
CPDPRG2 waltz16  
NUC2 1H  
PCPD2 80.00 usec  
PL2 2.00 dB  
PL12 16.50 dB  
PL13 16.50 dB  
SFO2 500.1320005 MHz  
SI 32768  
SF 125.7577890 MHz  
WDW no  
SSB 0  
LB 0.00 Hz  
GB 0  
PC 1.40

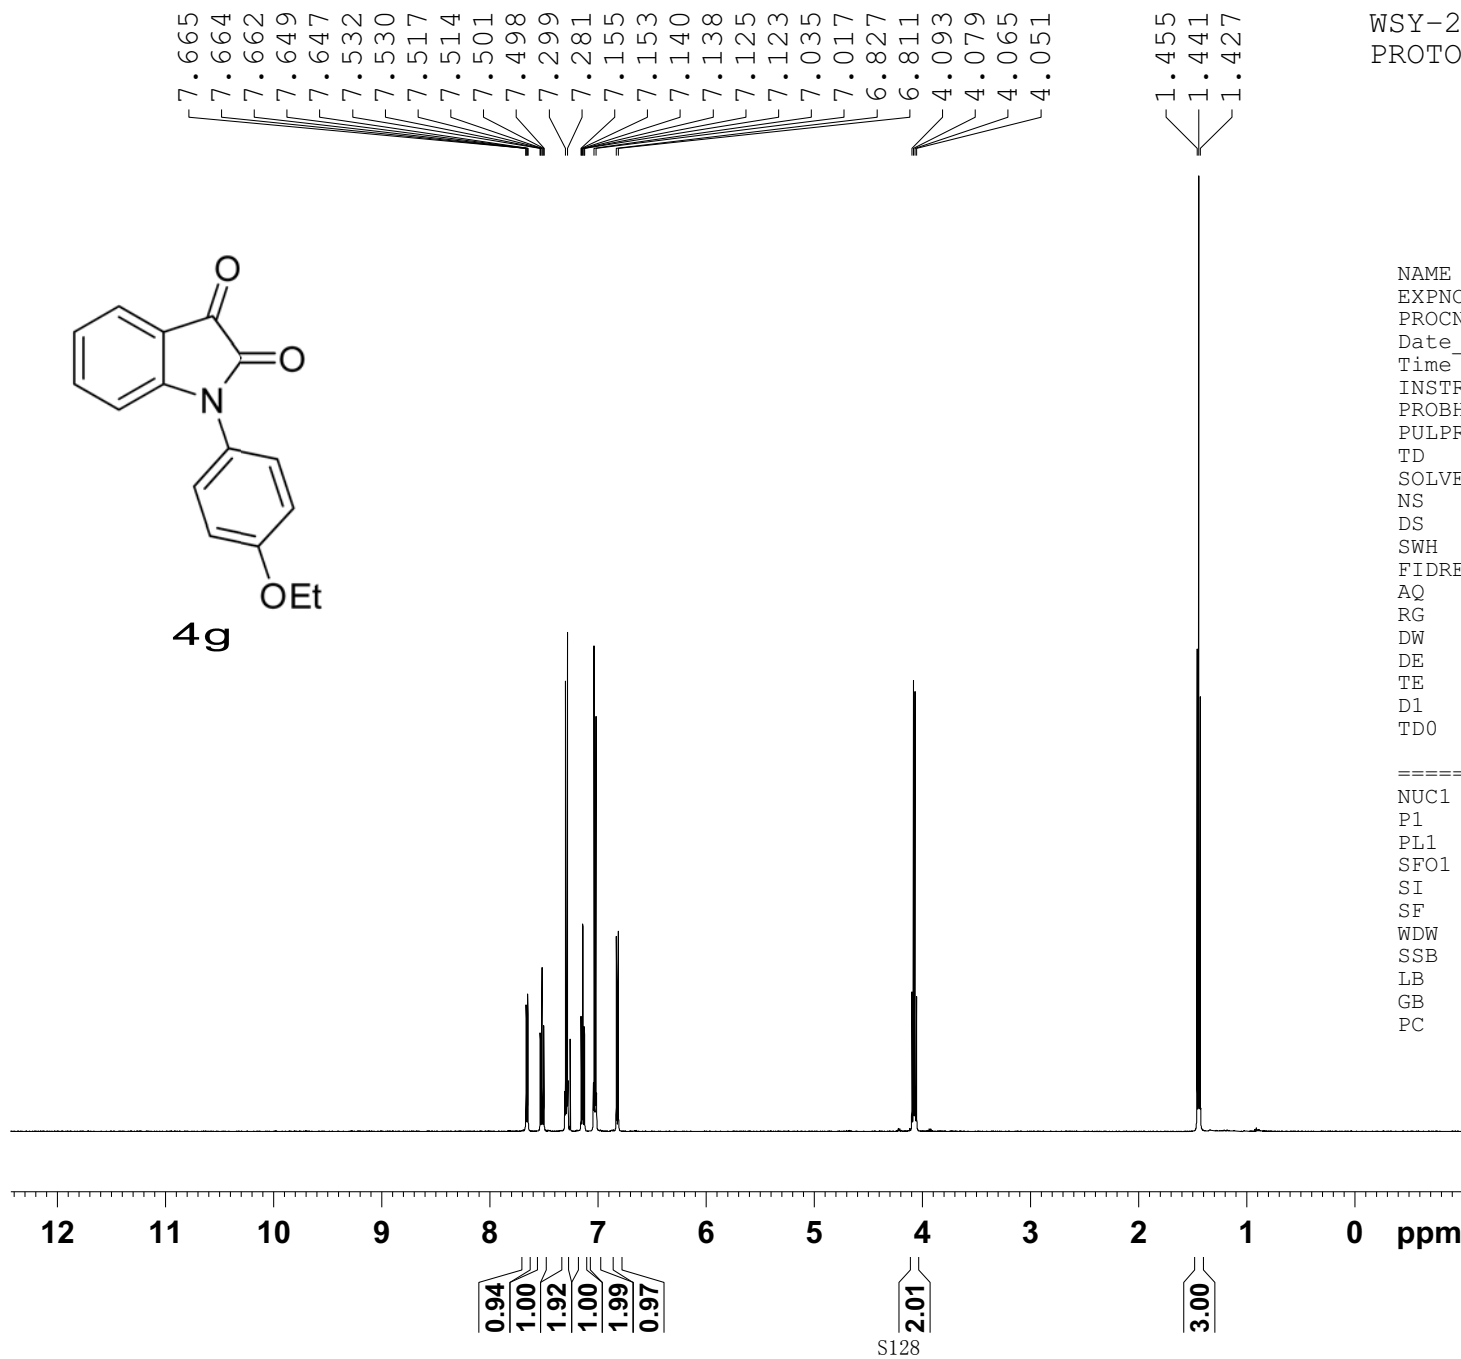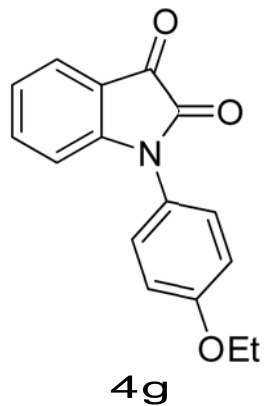

WSY-2-131  
PROTON CDC13 D:\\ deng 4

```
NAME          XB20071224
EXPNO          13
PROCNO         1
Date_          20071224
Time_          16.17
INSTRUM        spect
PROBHD         5 mm PABBO BB-
PULPROG        zg30
TD             65536
SOLVENT        CDC13
NS             16
DS             2
SWH            10330.578 Hz
FIDRES         0.157632 Hz
AQ            3.1720407 sec
RG            161.3
DW            48.400 usec
DE            6.00 usec
TE            293.5 K
D1            1.00000000 sec
TD0           1

===== CHANNEL f1 =====
NUC1           1H
P1            14.50 usec
PL1           3.50 dB
SFO1          500.1330885 MHz
SI            32768
SF            500.1300157 MHz
WDW           no
SSB           0
LB            0.00 Hz
GB            0
PC            1.00
```



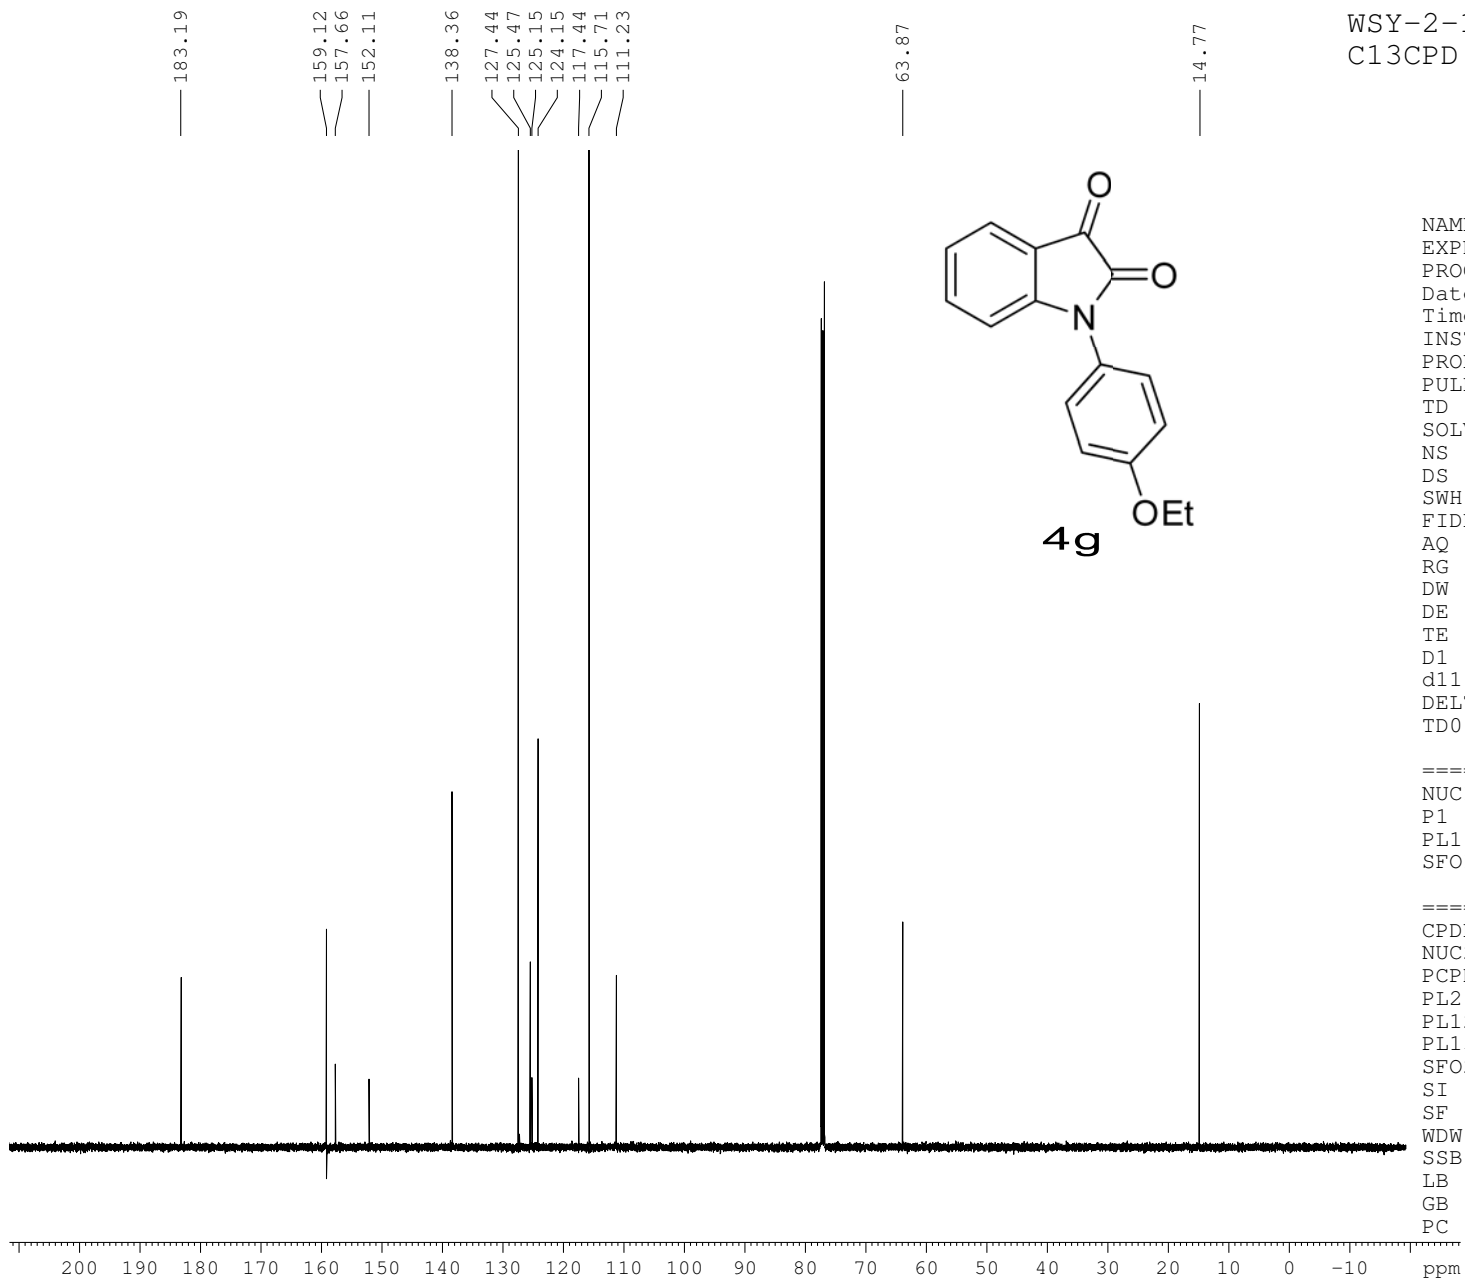

WSY-2-131  
C13CPD CDC13 D:\\ deng 8

NAME XB20071224  
EXPNO 17  
PROCNO 1  
Date\_ 20071224  
Time 17.57  
INSTRUM spect  
PROBHD 5 mm PABBO BB-  
PULPROG zgpg30  
TD 65536  
SOLVENT CDC13  
NS 1024  
DS 4  
SWH 30030.029 Hz  
FIDRES 0.458222 Hz  
AQ 1.0912410 sec  
RG 287.4  
DW 16.650 usec  
DE 6.00 usec  
TE 295.8 K  
D1 2.00000000 sec  
d11 0.03000000 sec  
DELTA 1.89999998 sec  
TD0 1

==== CHANNEL f1 =====  
NUC1 13C  
P1 9.20 usec  
PL1 1.00 dB  
SFO1 125.7703643 MHz

==== CHANNEL f2 =====  
CPDPRG2 waltz16  
NUC2 1H  
PCPD2 80.00 usec  
PL2 3.50 dB  
PL12 18.30 dB  
PL13 18.30 dB  
SFO2 500.1320005 MHz  
SI 32768  
SF 125.7577890 MHz  
WDW no  
SSB 0  
LB 0.00 Hz  
GB 0  
PC 1.40

SUNJ-3-49A  
PROTON CDC13 D:\\ deng 25

7.712  
7.695  
7.678  
7.576  
7.561  
7.546  
7.328  
7.311  
7.209  
7.194  
7.179  
6.904  
6.888

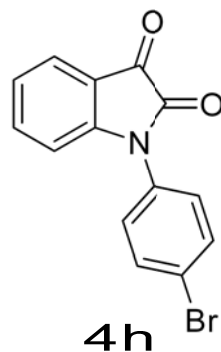

```
NAME          XB20120605
EXPNO         1
PROCNO        1
Date_         20120605
Time          12.07
INSTRUM       spect
PROBHD        5 mm PATXO 19F
PULPROG       zg30
TD            65536
SOLVENT       CDC13
NS            16
DS            2
SWH           10330.578 Hz
FIDRES        0.157632 Hz
AQ            3.1720407 sec
RG            362
DW            48.400 usec
DE            6.00 usec
TE            295.8 K
D1            1.00000000 sec
TD0           1
```

```
===== CHANNEL f1 =====
NUC1          1H
P1            13.72 usec
PL1           1.00 dB
SFO1          500.1330885 MHz
SI            32768
SF            500.1300128 MHz
WDW           no
SSB           0
LB            0.00 Hz
GB            0
PC            1.00
```

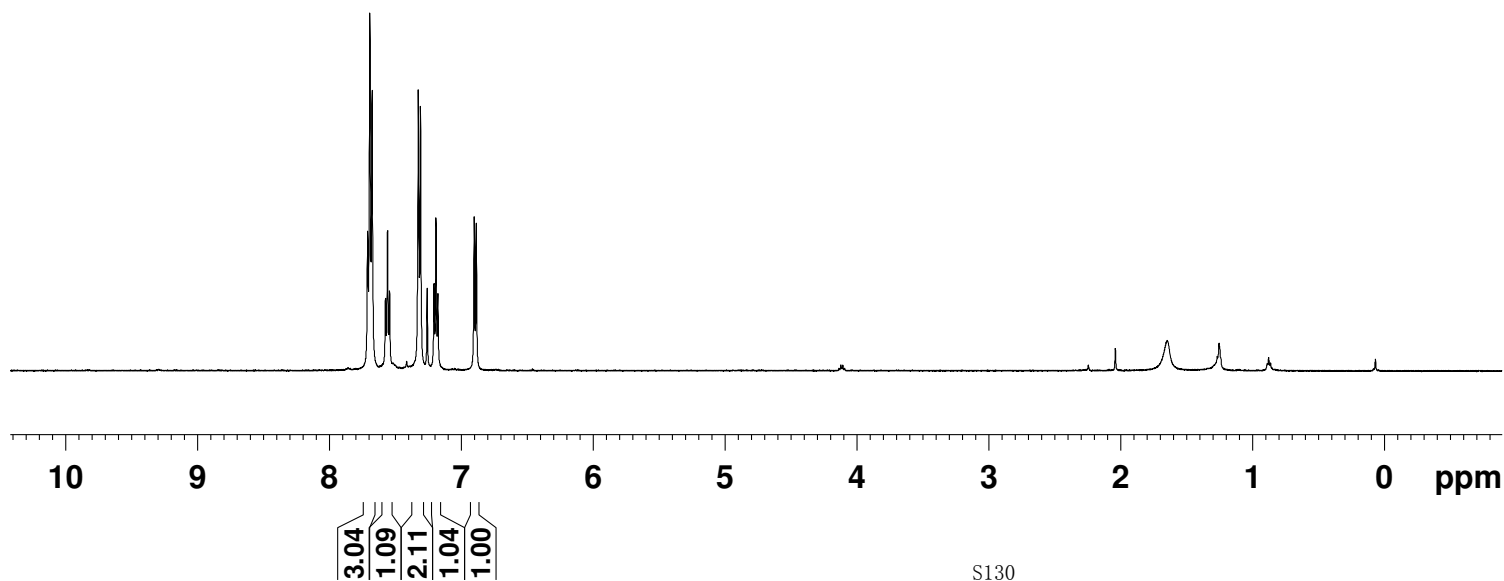

SUNJ-3-49A  
C13CPD CDC13 D:\\ deng 25

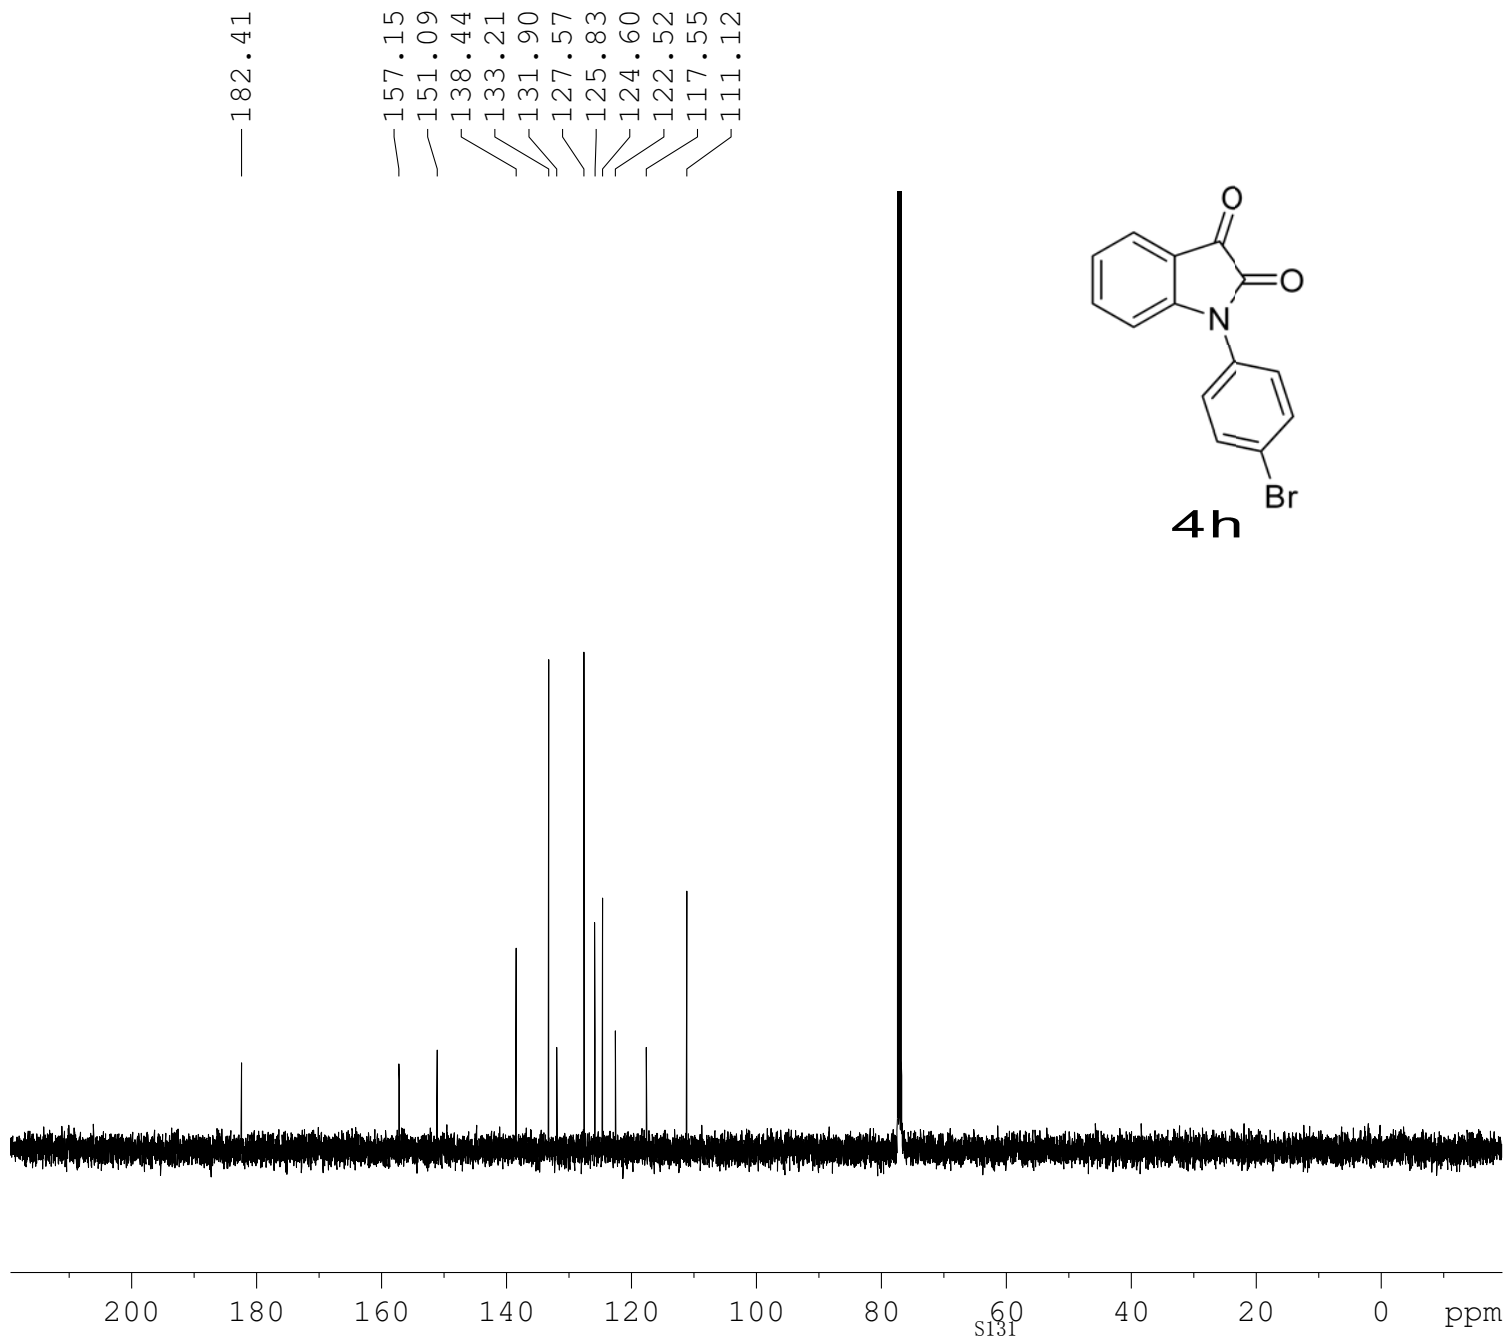

```
NAME          XB20120605
EXPNO         2
PROCNO        1
Date_         20120605
Time          12.22
INSTRUM       spect
PROBHD        5 mm PATXO 19F
PULPROG       zgpg30
TD            65536
SOLVENT       CDC13
NS            256
DS            4
SWH           30030.029 Hz
FIDRES        0.458222 Hz
AQ            1.0912410 sec
RG            203.2
DW            16.650 usec
DE            6.00 usec
TE            297.1 K
D1            2.00000000 sec
TD0           1
```

```
===== CHANNEL f1 =====
NUC1          13C
P1            9.50 usec
PL1           -0.50 dB
SFO1          125.7703643 MHz
SI            32768
SF            125.7577890 MHz
WDW           EM
SSB           0
LB            1.00 Hz
GB            0
PC            1.40
```

WSY-2-157-6  
PROTON CDC13 D:\\ deng 33

7.716  
7.715  
7.701  
7.578  
7.576  
7.563  
7.561  
7.543  
7.539  
7.529  
7.526  
7.390  
7.386  
7.376  
7.372  
7.210  
7.195  
7.180  
6.899  
6.883

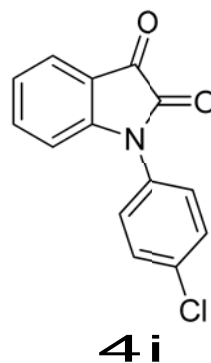

```
NAME          XB20080222
EXPNO         3
PROCNO        1
Date_         20080222
Time_         14.01
INSTRUM       spect
PROBHD        5 mm PATXO 19F
PULPROG       zg30
TD            65536
SOLVENT       CDC13
NS            16
DS            2
SWH           10330.578 Hz
FIDRES        0.157632 Hz
AQ            3.1720407 sec
RG            406.4
DW            48.400 usec
DE            6.00 usec
TE            295.0 K
D1            1.00000000 sec
TD0           1
```

```
===== CHANNEL f1 =====
NUC1          1H
P1            14.50 usec
PL1           2.00 dB
SFO1          500.1330885 MHz
SI            32768
SF            500.1300130 MHz
WDW           no
SSB           0
LB            0.00 Hz
GB            0
PC            1.00
```

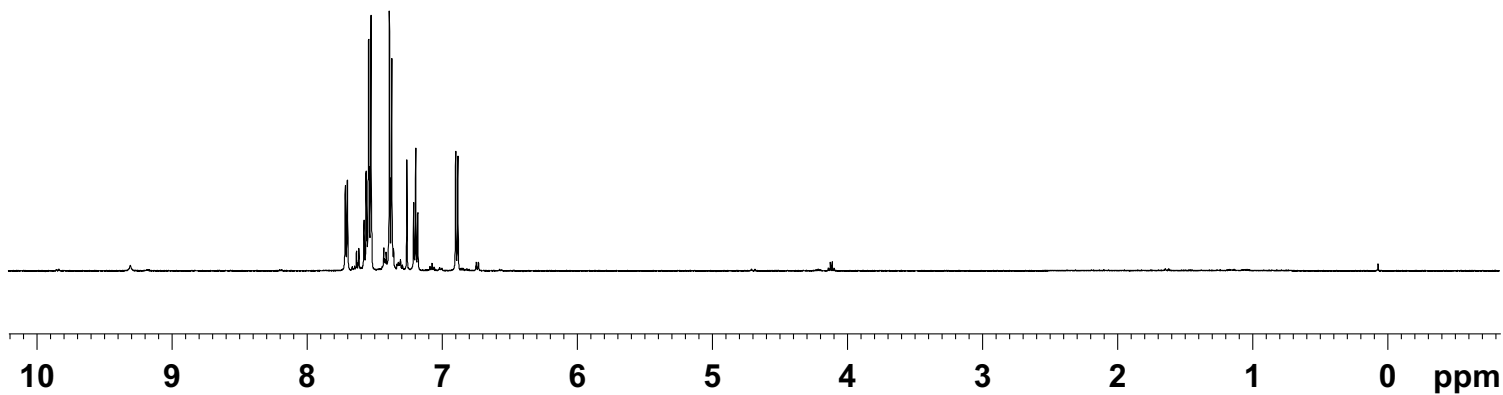

1.00  
3.31  
2.23  
1.06  
1.02

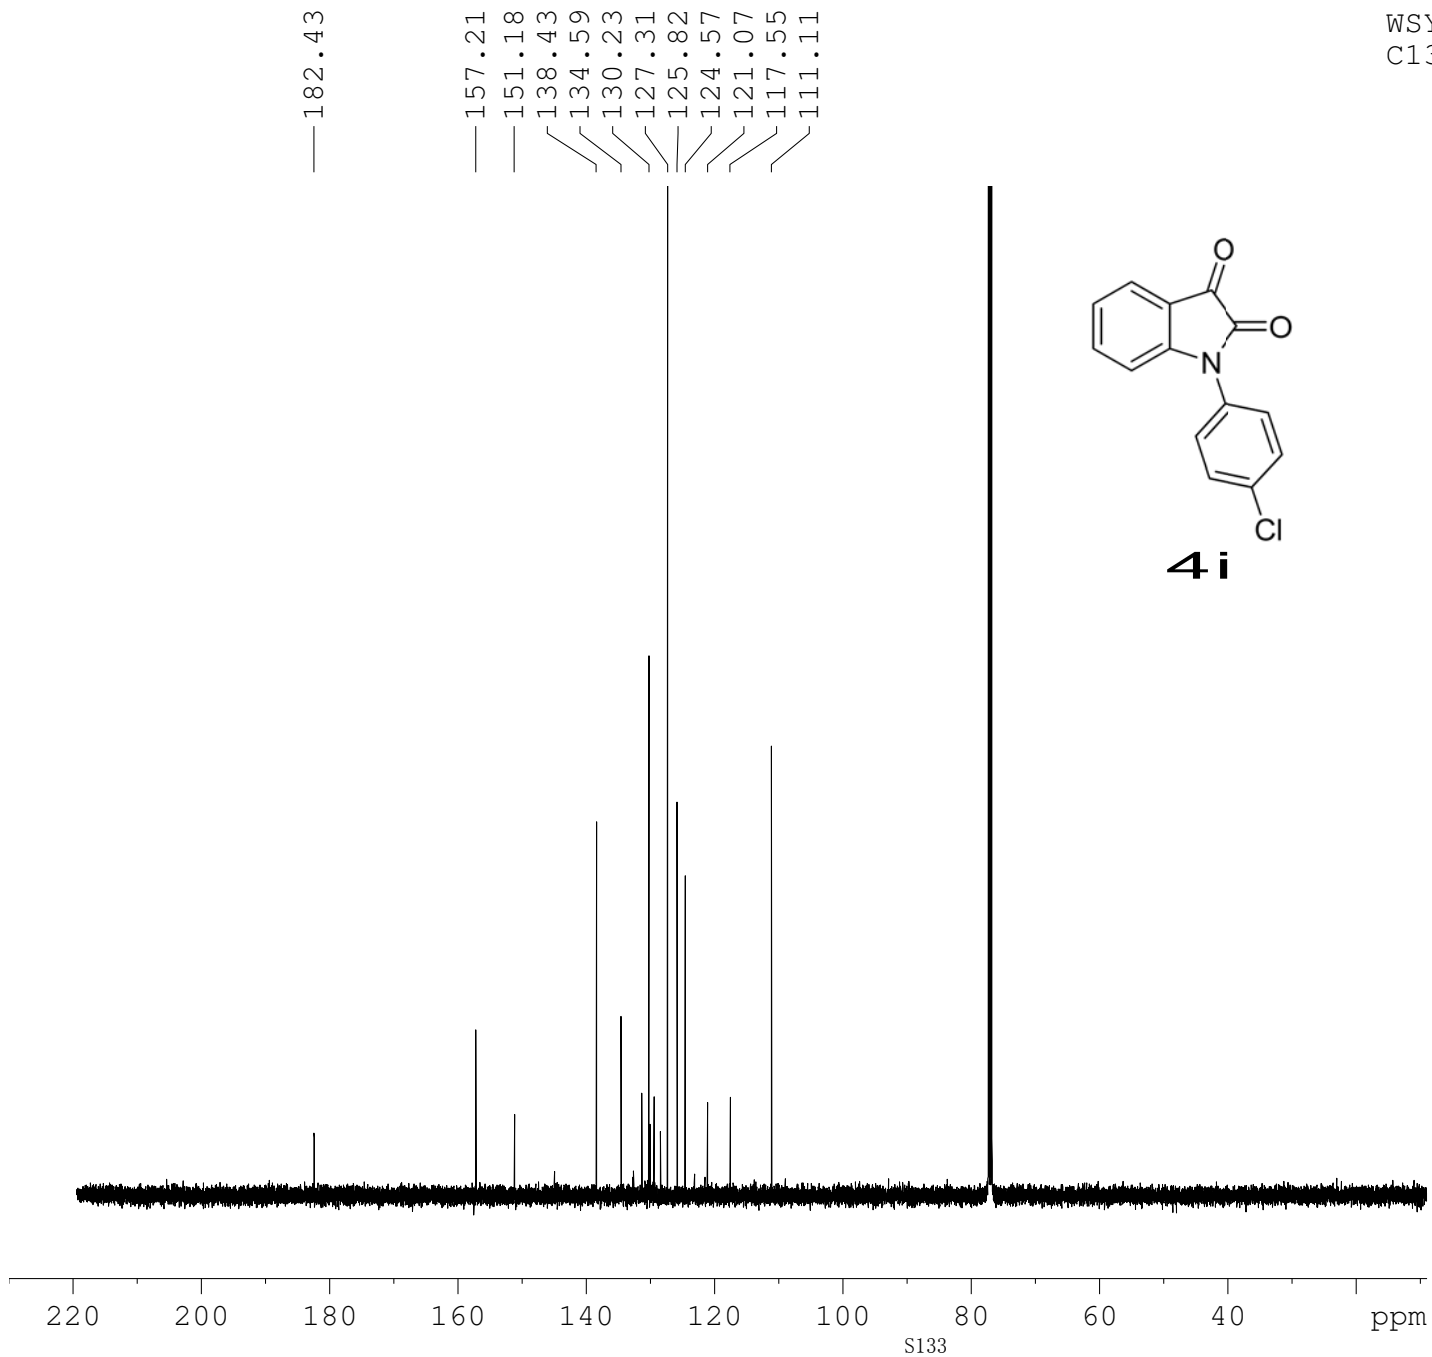

WSY-2-157-6  
C13CPD CDC13 D:\\ deng 43

NAME XB20080222  
EXPNO 9  
PROCNO 1  
Date\_ 20080222  
Time 22.10  
INSTRUM spect  
PROBHD 5 mm PATXO 19F  
PULPROG zgpg30  
TD 65536  
SOLVENT CDC13  
NS 4096  
DS 4  
SWH 30030.029 Hz  
FIDRES 0.458222 Hz  
AQ 1.0912410 sec  
RG 161.3  
DW 16.650 usec  
DE 6.00 usec  
TE 296.3 K  
D1 2.00000000 sec  
d11 0.03000000 sec  
DELTA 1.89999998 sec  
TD0 1

==== CHANNEL f1 =====  
NUC1 13C  
P1 9.50 usec  
PL1 -0.50 dB  
SFO1 125.7703643 MHz

==== CHANNEL f2 =====  
CPDPRG2 waltz16  
NUC2 1H  
PCPD2 80.00 usec  
PL2 2.00 dB  
PL12 16.50 dB  
PL13 16.50 dB  
SFO2 500.1320005 MHz  
SI 32768  
SF 125.7577890 MHz  
WDW no  
SSB 0  
LB 0.00 Hz  
GB 0  
PC 1.40

SUNJ-2-166  
PROTON CDC13 D:\ deng 43

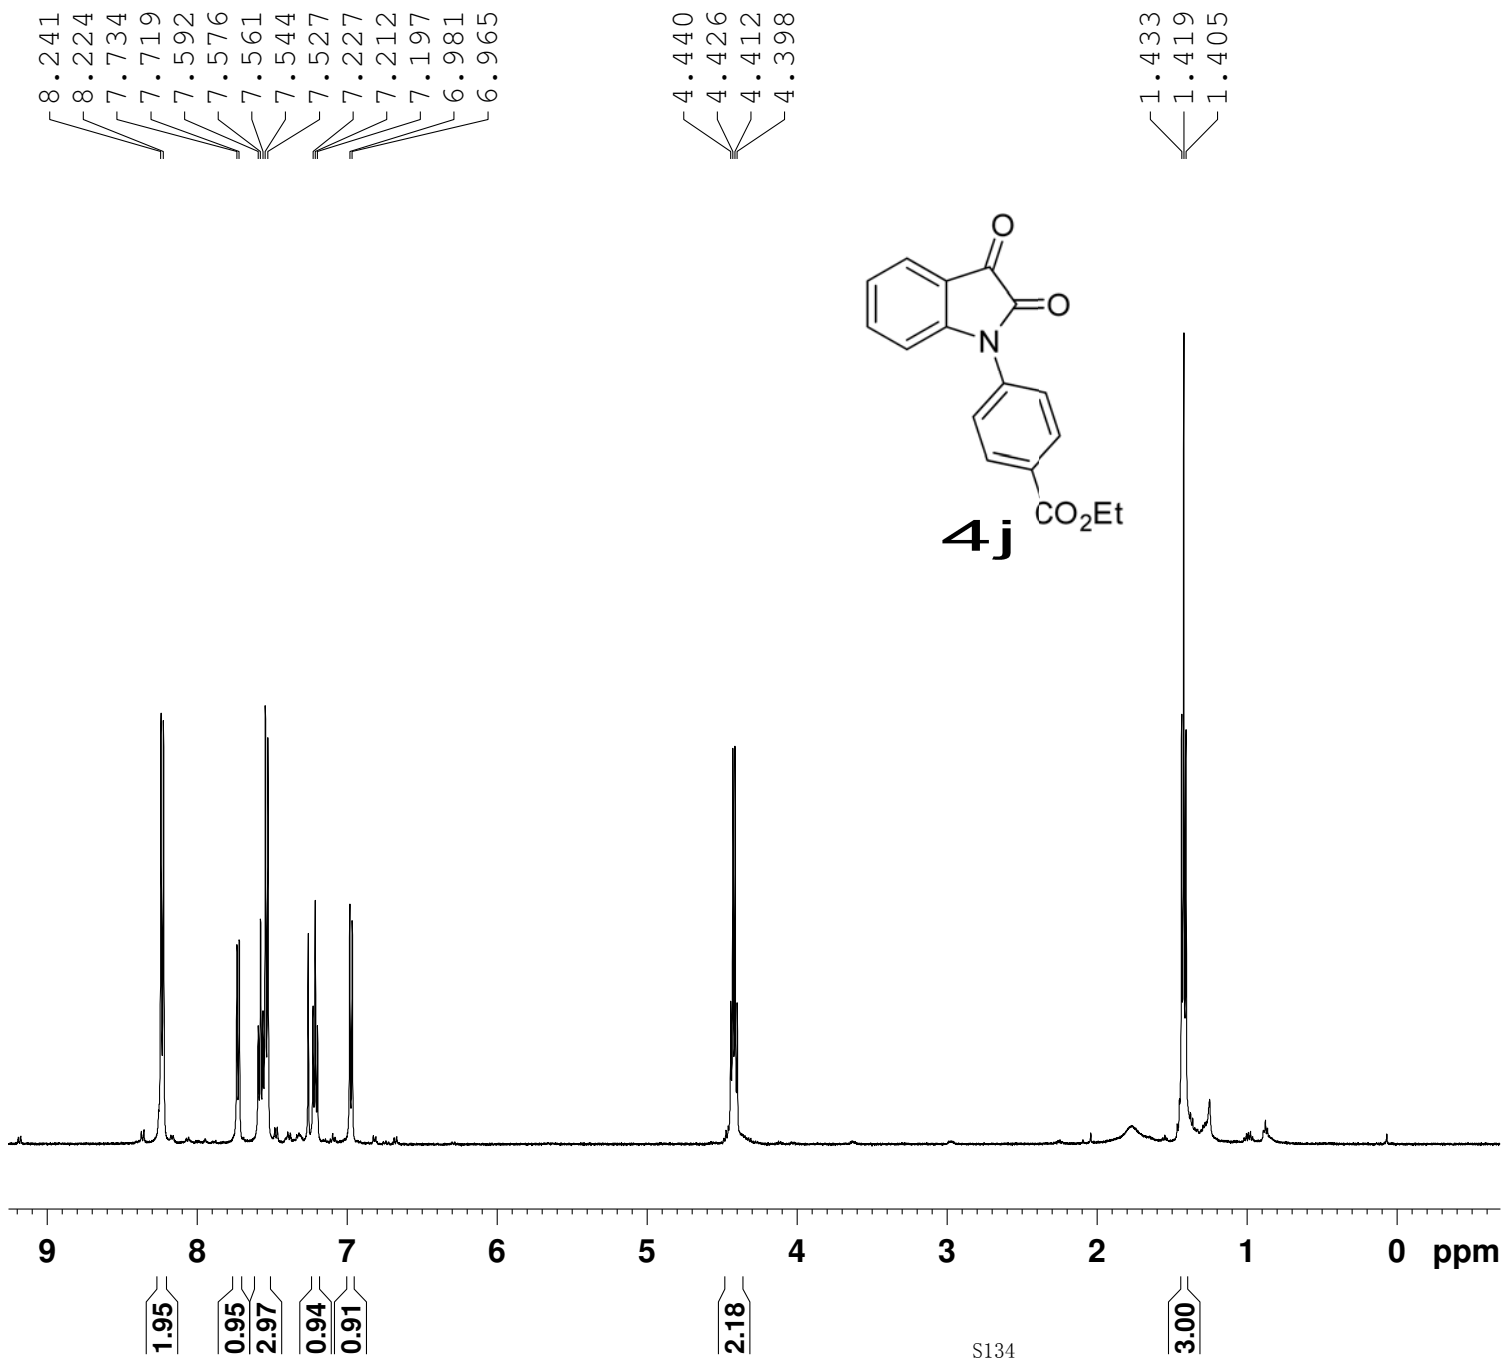

NAME xb20120331  
EXPNO 1  
PROCNO 1  
Date\_ 20120331  
Time 12.42  
INSTRUM spect  
PROBHD 5 mm PATXO 19F  
PULPROG zg30  
TD 65536  
SOLVENT CDC13  
NS 16  
DS 2  
SWH 10330.578 Hz  
FIDRES 0.157632 Hz  
AQ 3.1720407 sec  
RG 362  
DW 48.400 usec  
DE 6.00 usec  
TE 294.1 K  
D1 1.00000000 sec  
TD0 1

==== CHANNEL f1 =====  
NUC1 1H  
P1 13.70 usec  
PL1 1.00 dB  
SFO1 500.1330885 MHz  
SI 32768  
SF 500.1300136 MHz  
WDW no  
SSB 0  
LB 0.00 Hz  
GB 0  
PC 1.00

SUNJ-2-166  
C13CPD CDC13 D:\ deng 2

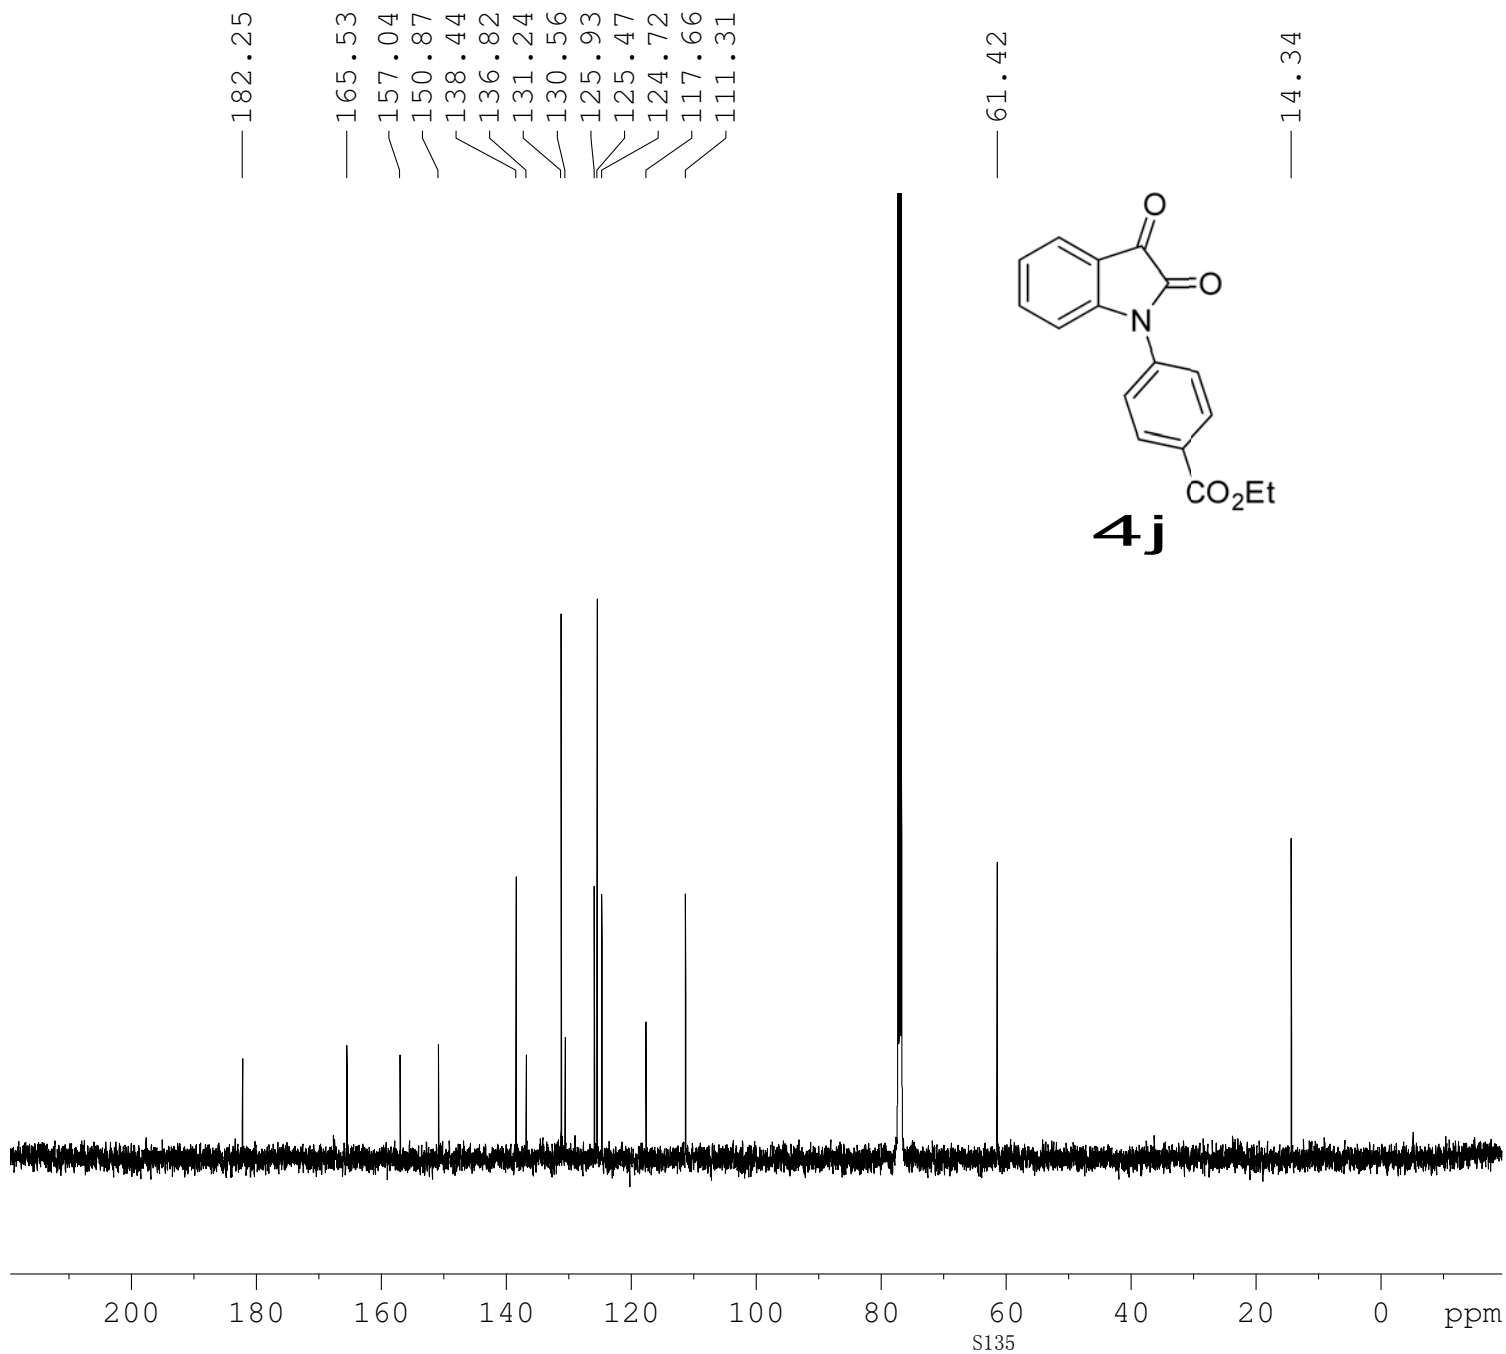

```
NAME          SUNJ-2-166
EXPNO         11
PROCNO        1
Date_         20120331
Time          21.02
INSTRUM       spect
PROBHD        5 mm PATXO 19F
PULPROG       zgpg30
TD            65536
SOLVENT       CDC13
NS            1024
DS            4
SWH           30030.029 Hz
FIDRES        0.458222 Hz
AQ            1.0912410 sec
RG            143.7
DW            16.650 usec
DE            6.00 usec
TE            295.9 K
D1            2.00000000 sec
d11           0.03000000 sec
DELTA         1.89999998 sec
TD0           1
```

```
===== CHANNEL f1 =====
NUC1          13C
P1            9.50 usec
PL1           -0.50 dB
SFO1         125.7703643 MHz
```

```
===== CHANNEL f2 =====
CPDPRG2       waltz16
NUC2          1H
PCPD2         80.00 usec
PL2           1.00 dB
PL12          16.33 dB
PL13          16.50 dB
SFO2         500.1320005 MHz
SI            32768
SF           125.7577890 MHz
WDW           EM
SSB           0
LB            2.00 Hz
GB            0
PC            0.20
```

SUNJ-2-165  
PROTON CDC13 D:\\ deng 19

8.020  
8.004  
7.981  
7.964  
7.752  
7.737  
7.704  
7.688  
7.633  
7.618  
7.602  
7.581  
7.567  
7.551  
7.541  
7.526  
7.519  
7.503  
7.489  
7.457  
7.441  
7.426  
7.179  
7.165  
7.149  
6.438  
6.423

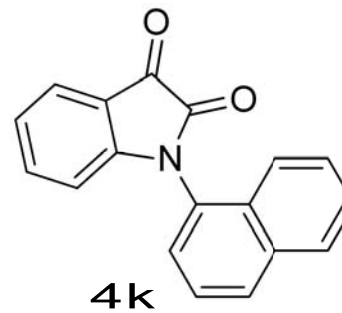

NAME xb20120401  
EXPNO 1  
PROCNO 1  
Date\_ 20120401  
Time\_ 16.12  
INSTRUM spect  
PROBHD 5 mm PATXO 19F  
PULPROG zg30  
TD 65536  
SOLVENT CDC13  
NS 16  
DS 2  
SWH 10330.578 Hz  
FIDRES 0.157632 Hz  
AQ 3.1720407 sec  
RG 203.2  
DW 48.400 usec  
DE 6.00 usec  
TE 294.6 K  
D1 1.00000000 sec  
TD0 1

===== CHANNEL f1 =====  
NUC1 1H  
P1 13.70 usec  
PL1 1.00 dB  
SFO1 500.1330885 MHz  
SI 32768  
SF 500.1300147 MHz  
WDW no  
SSB 0  
LB 0.00 Hz  
GB 0  
PC 1.00

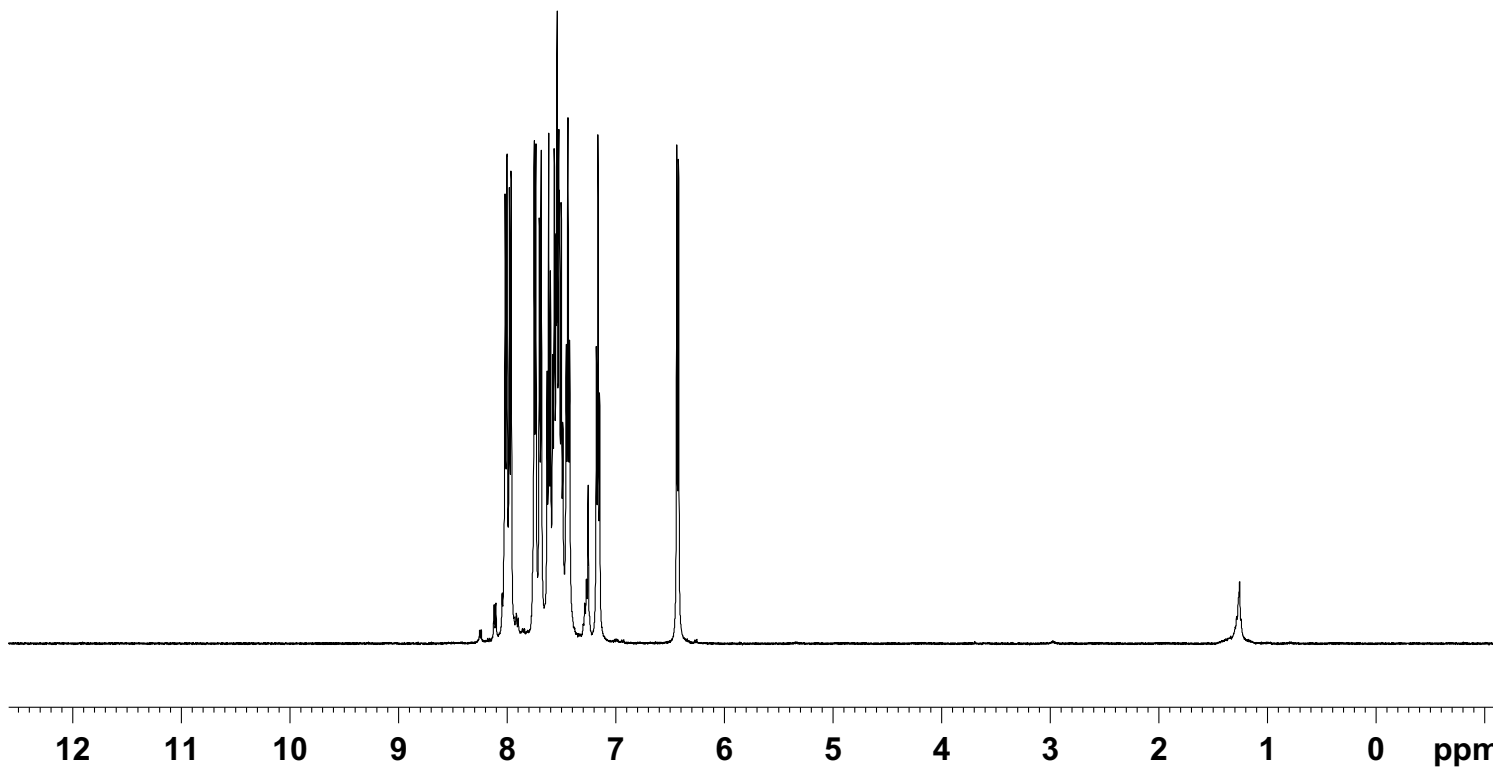

0.93  
0.88  
0.91  
0.90  
4.10  
1.09  
0.96  
0.91



SUNJ-2-165  
C13CPD CDC13 D:\\ deng 19

182.97  
158.08  
152.67  
138.61  
134.85  
130.25  
129.40  
128.87  
127.48  
126.99  
126.02  
125.87  
125.53  
124.29  
122.43  
117.46  
111.84

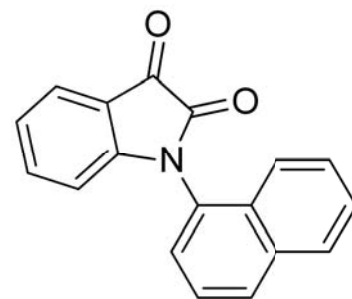

4k

NAME xb20120401  
EXPNO 3  
PROCNO 1  
Date\_ 20120401  
Time 16.23  
INSTRUM spect  
PROBHD 5 mm PATXO 19F  
PULPROG zgpg30  
TD 65536  
SOLVENT CDC13  
NS 128  
DS 4  
SWH 30030.029 Hz  
FIDRES 0.458222 Hz  
AQ 1.0912410 sec  
RG 322.5  
DW 16.650 usec  
DE 6.00 usec  
TE 295.8 K  
D1 2.00000000 sec  
TD0 1

==== CHANNEL f1 =====  
NUC1 13C  
P1 9.50 usec  
PL1 -0.50 dB  
SFO1 125.7703643 MHz  
SI 32768  
SF 125.7577890 MHz  
WDW EM  
SSB 0  
LB 1.00 Hz  
GB 0  
PC 1.40

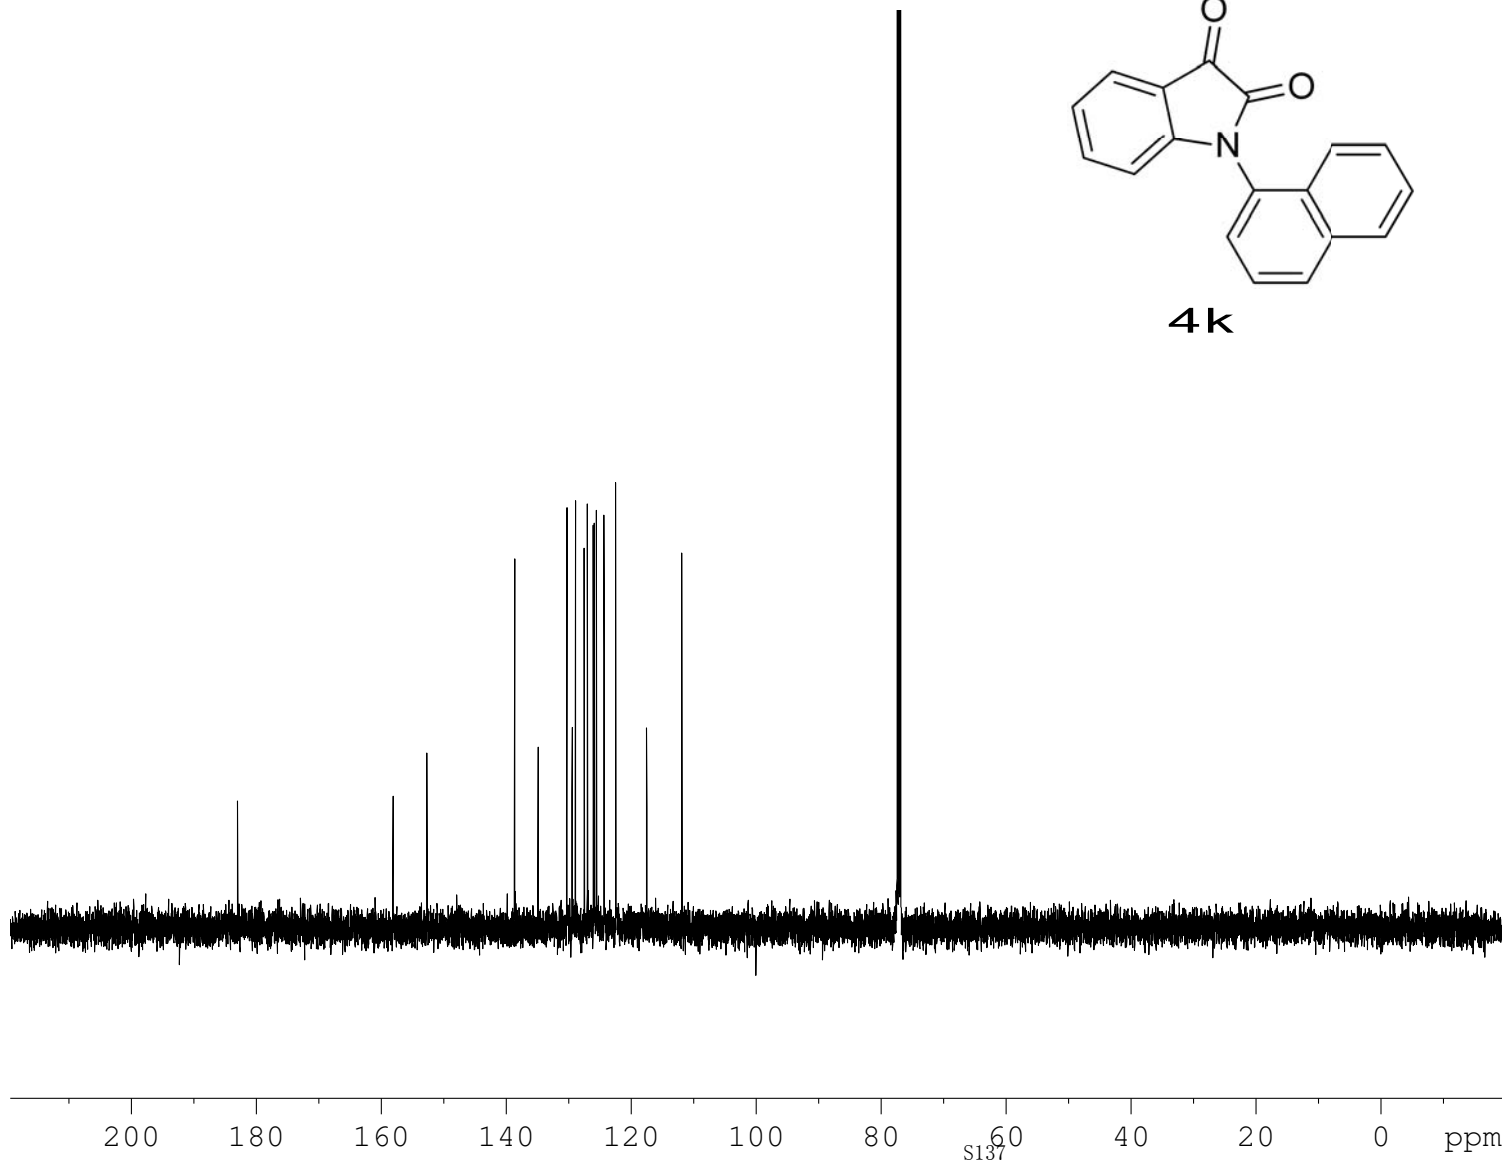

S137

SUNJ-2-153-2  
PROTON CDC13 D:\ deng 16

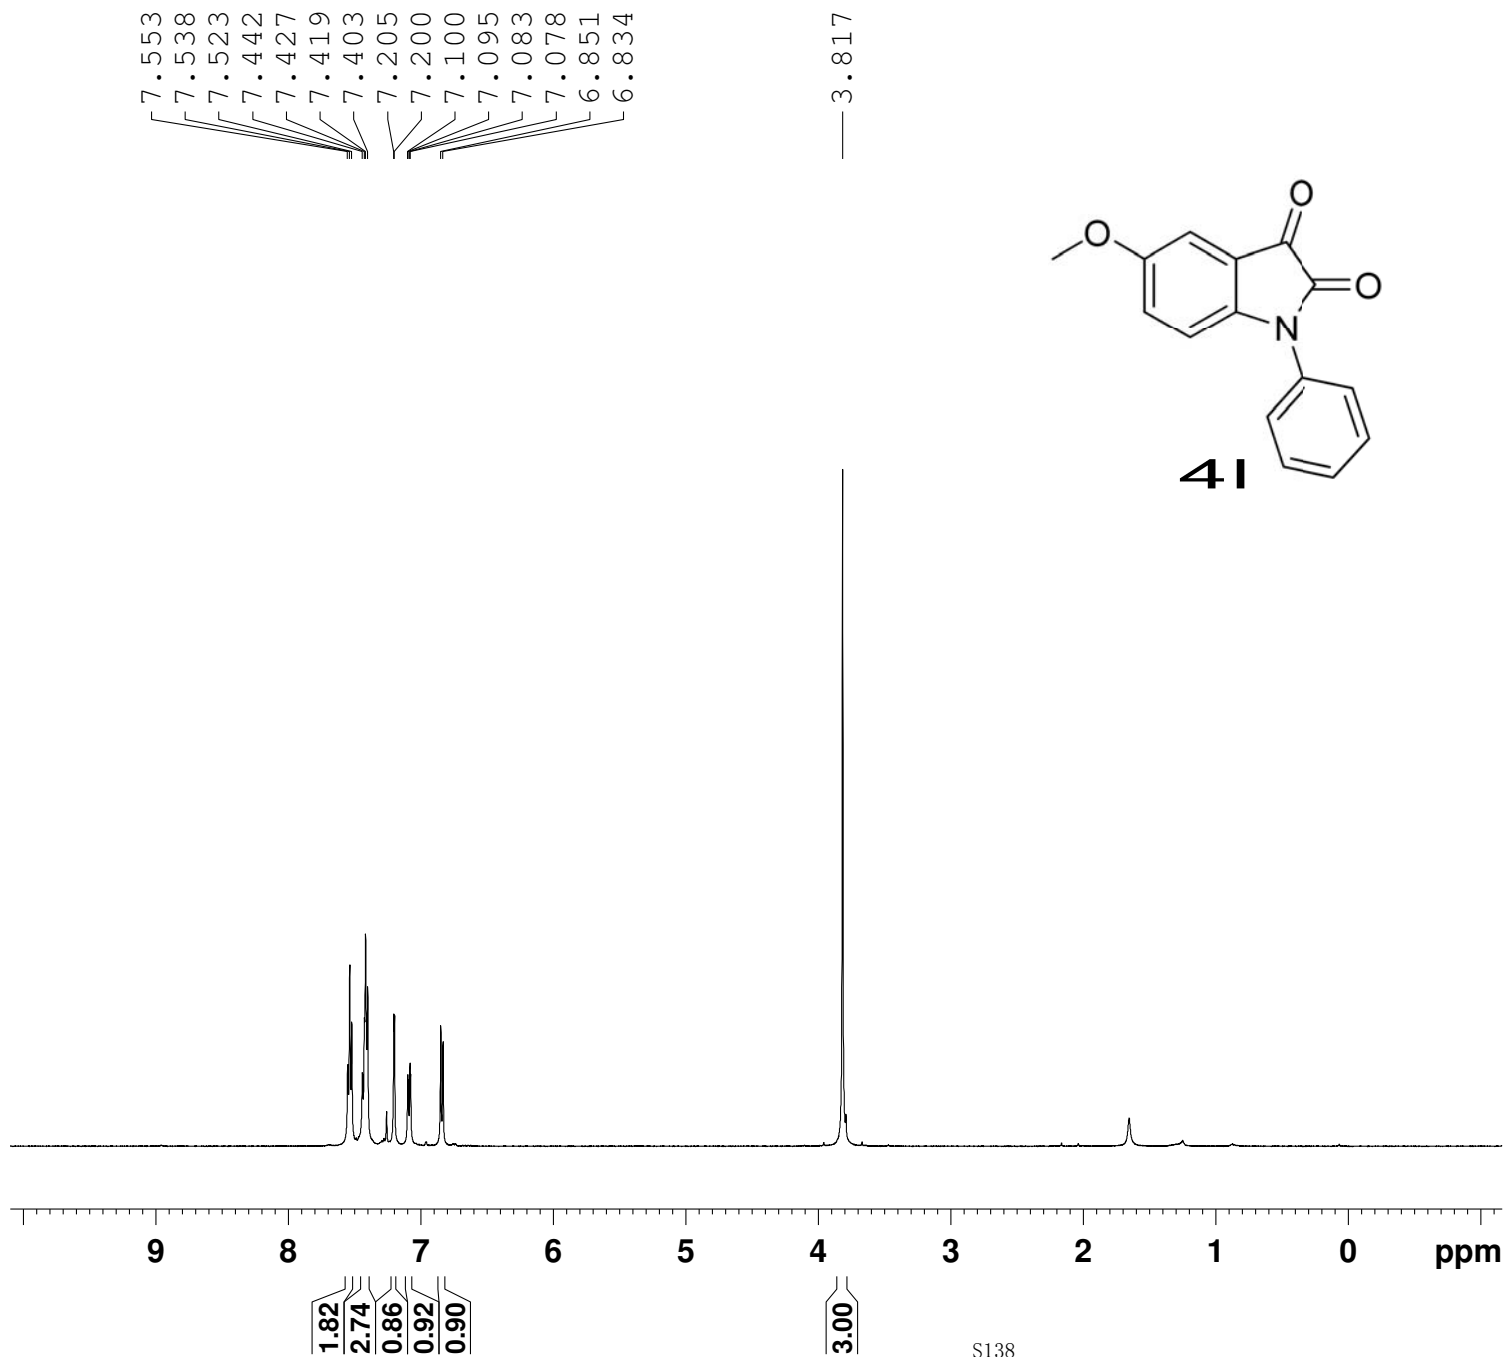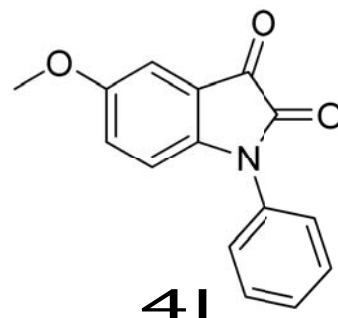

```
NAME          XB20120319
EXPNO         4
PROCNO       1
Date_        20120319
Time         16.45
INSTRUM      spect
PROBHD       5 mm PATXO 19F
PULPROG      zg30
TD           65536
SOLVENT      CDC13
NS           8
DS           2
SWH          10330.578 Hz
FIDRES       0.157632 Hz
AQ           3.172047 sec
RG           256
DW           48.400 usec
DE           6.00 usec
TE           293.9 K
D1           1.00000000 sec
TD0          1
```

```
===== CHANNEL f1 =====
NUC1          1H
P1            13.70 usec
PL1           1.00 dB
SFO1          500.1330885 MHz
SI            32768
SF            500.1300129 MHz
WDW           no
SSB           0
LB            0.00 Hz
GB            0
PC            1.00
```

SUNJ-2-153-2  
C13CPD CDC13 D:\\ deng 16

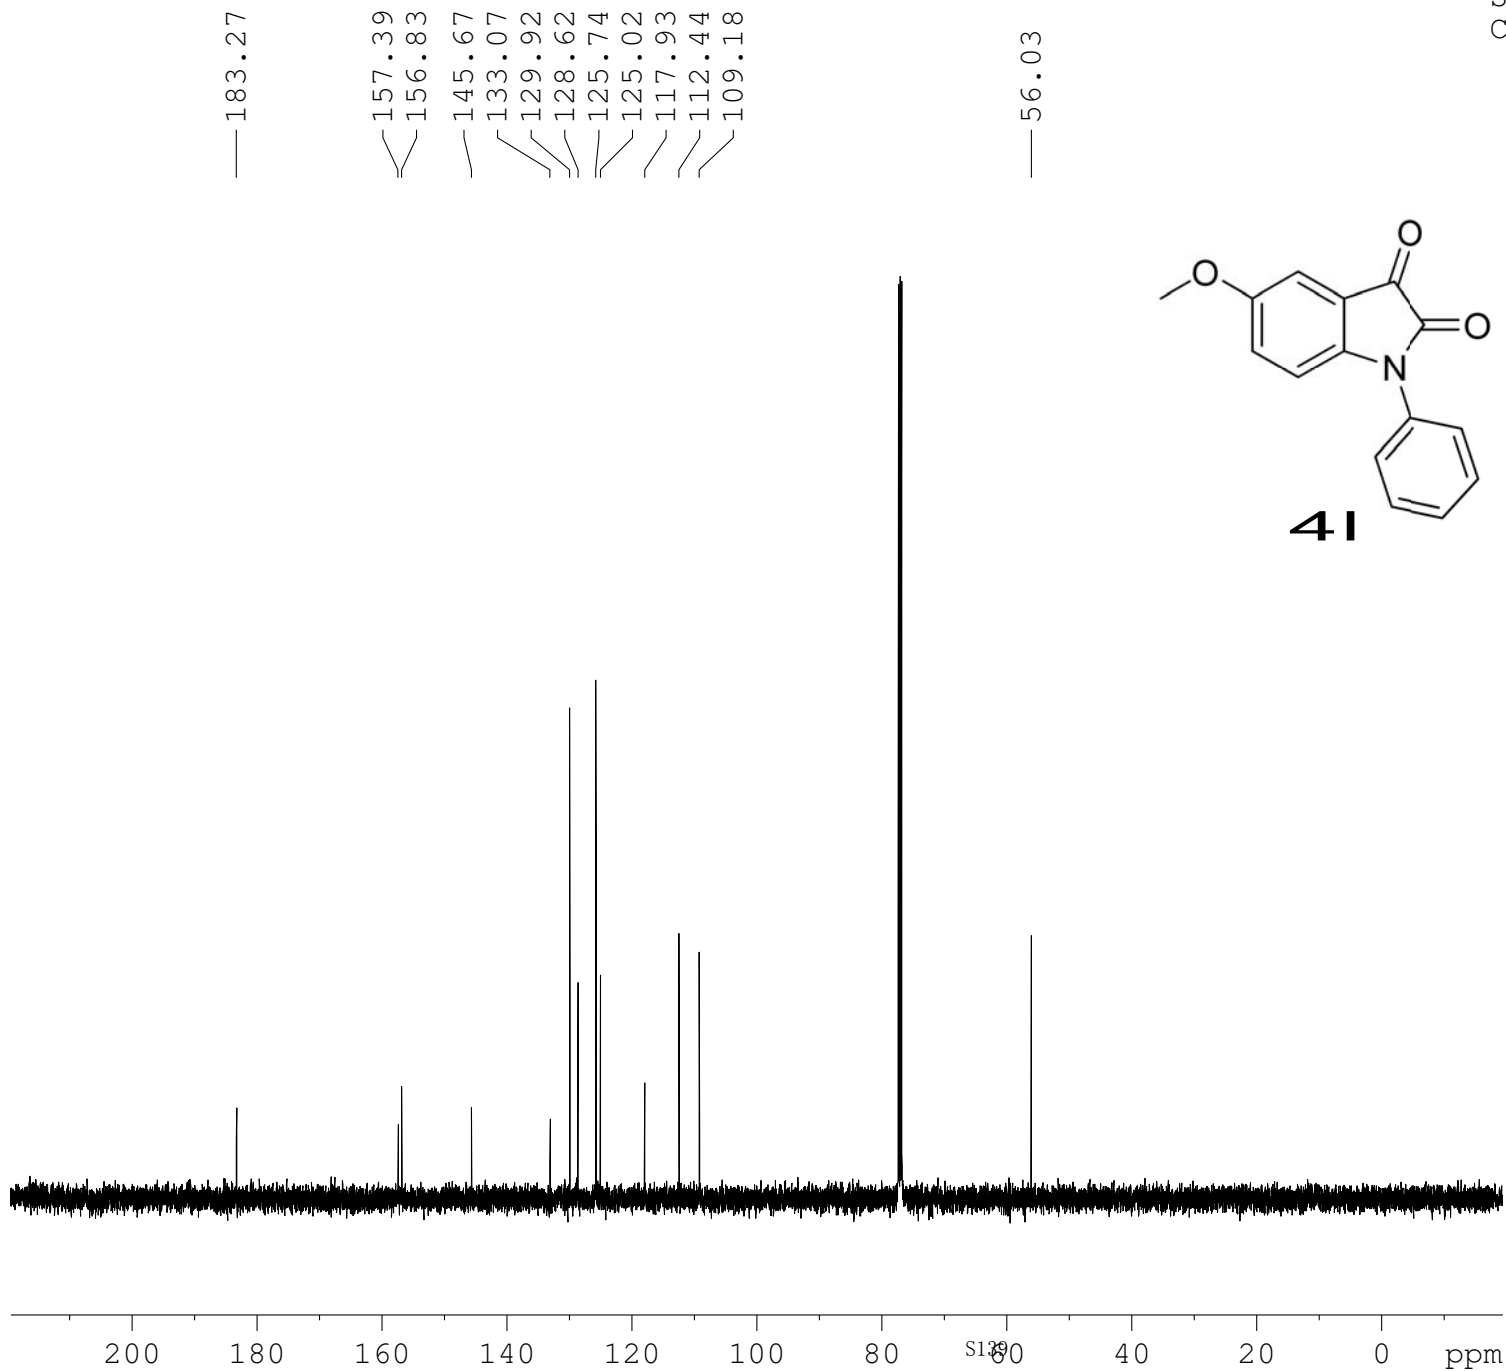

NAME XB20120319  
EXPNO 5  
PROCNO 1  
Date\_ 20120319  
Time 16.54  
INSTRUM spect  
PROBHD 5 mm PATXO 19F  
PULPROG zgpg30  
TD 65536  
SOLVENT CDC13  
NS 128  
DS 4  
SWH 30030.029 Hz  
FIDRES 0.458222 Hz  
AQ 1.0912410 sec  
RG 114  
DW 16.650 usec  
DE 6.00 usec  
TE 568.3 K  
D1 2.00000000 sec  
d11 0.03000000 sec  
DELTA 1.89999998 sec  
TD0 1

==== CHANNEL f1 =====  
NUC1 13C  
P1 9.50 usec  
PL1 -0.50 dB  
SFO1 125.7703643 MHz

==== CHANNEL f2 =====  
CPDPRG2 waltz16  
NUC2 1H  
PCPD2 80.00 usec  
PL2 1.00 dB  
PL12 16.33 dB  
PL13 16.50 dB  
SFO2 500.1320005 MHz  
SI 32768  
SF 125.7577890 MHz  
WDW EM  
SSB 0  
LB 1.00 Hz  
GB 0  
PC 1.40

SUNJ-3-36  
PROTON CDC13 D:\\ deng 3

NAME XB20120518  
EXPNO 2  
PROCNO 1  
Date\_ 20120518  
Time\_ 16.42  
INSTRUM spect  
PROBHD 5 mm PATXO 19F  
PULPROG zg30  
TD 65536  
SOLVENT CDC13  
NS 32  
DS 2  
SWH 10330.578 Hz  
FIDRES 0.157632 Hz  
AQ 3.1720407 sec  
RG 228.1  
DW 48.400 usec  
DE 6.00 usec  
TE 296.8 K  
D1 1.00000000 sec  
TD0 1

===== CHANNEL f1 =====  
NUC1 1H  
P1 13.72 usec  
PL1 1.00 dB  
SFO1 500.1330885 MHz  
SI 32768  
SF 500.1300140 MHz  
WDW no  
SSB 0  
LB 0.00 Hz  
GB 0  
PC 1.00

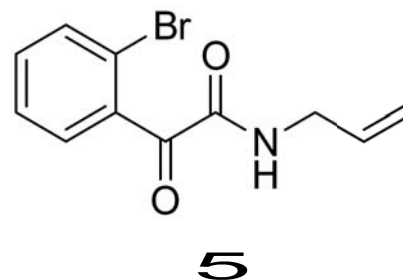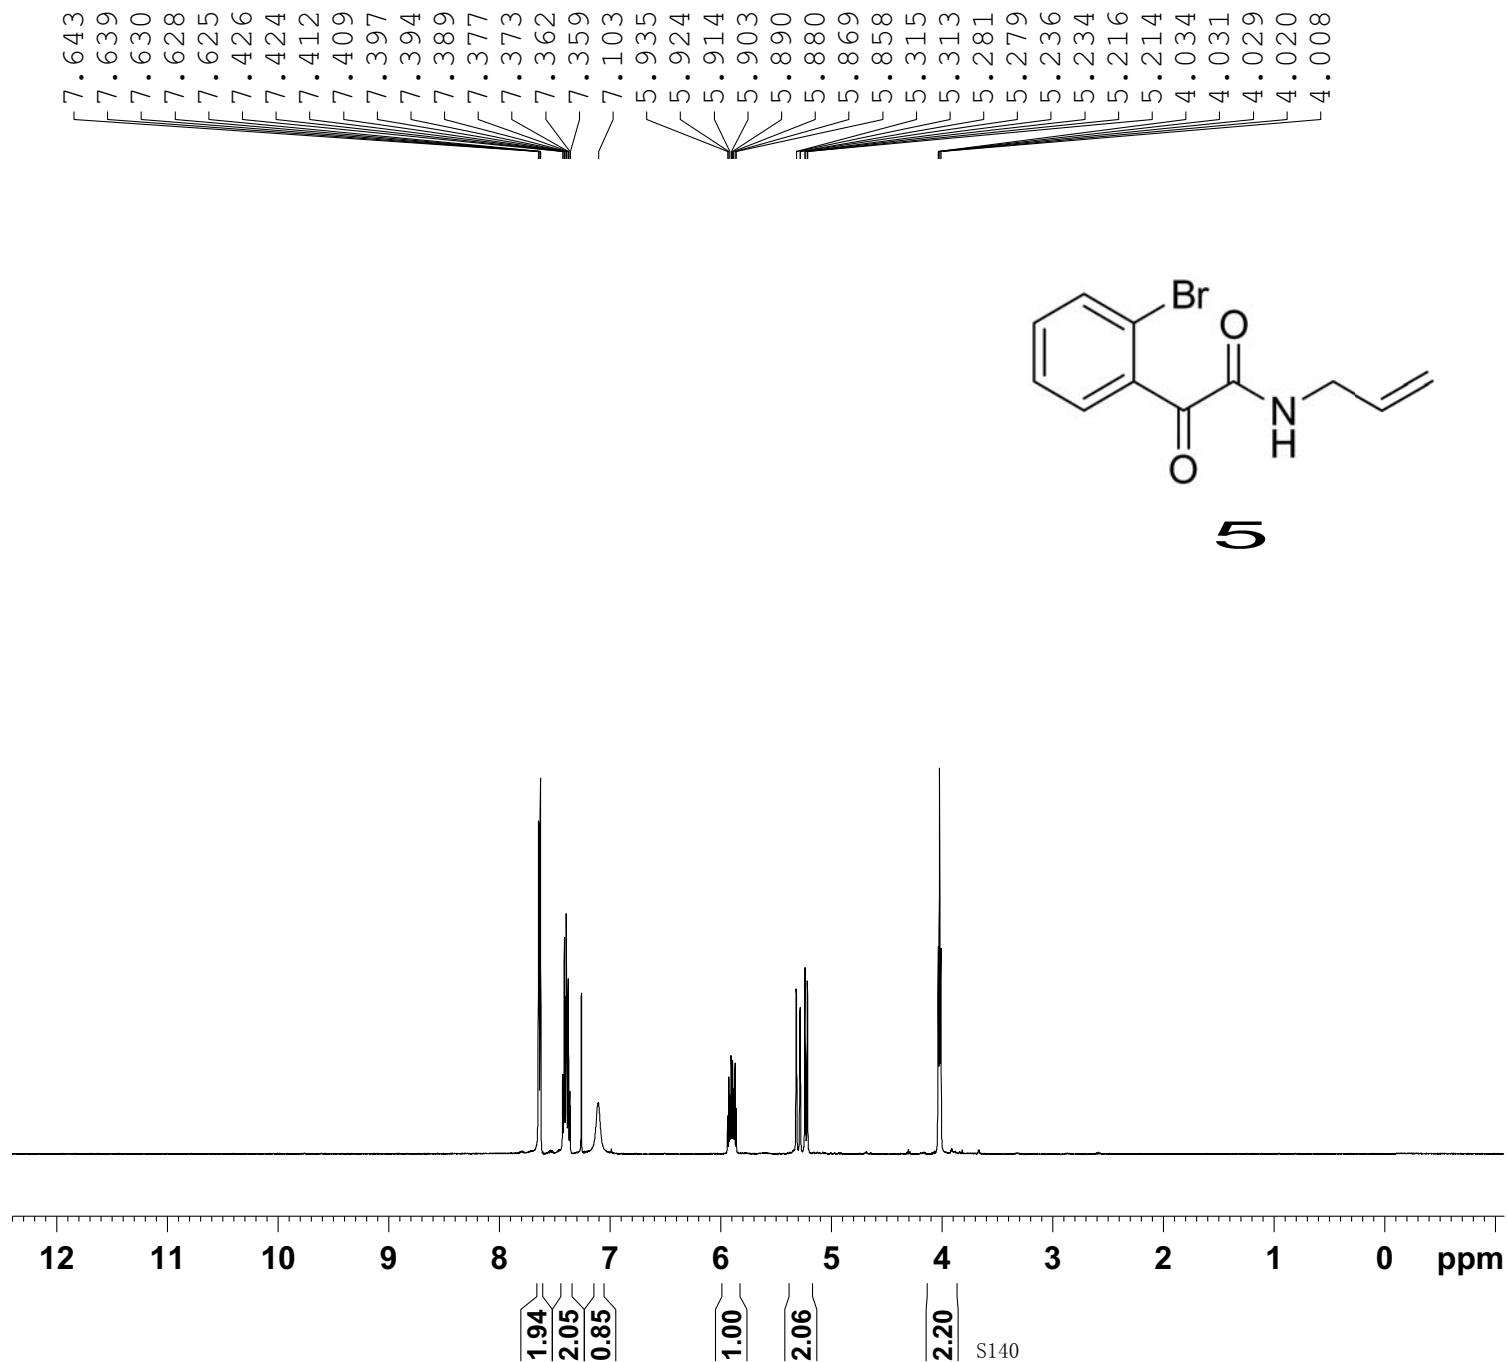

SUNJ-3-43-2  
C13CPD CDC13 D:\ deng 5

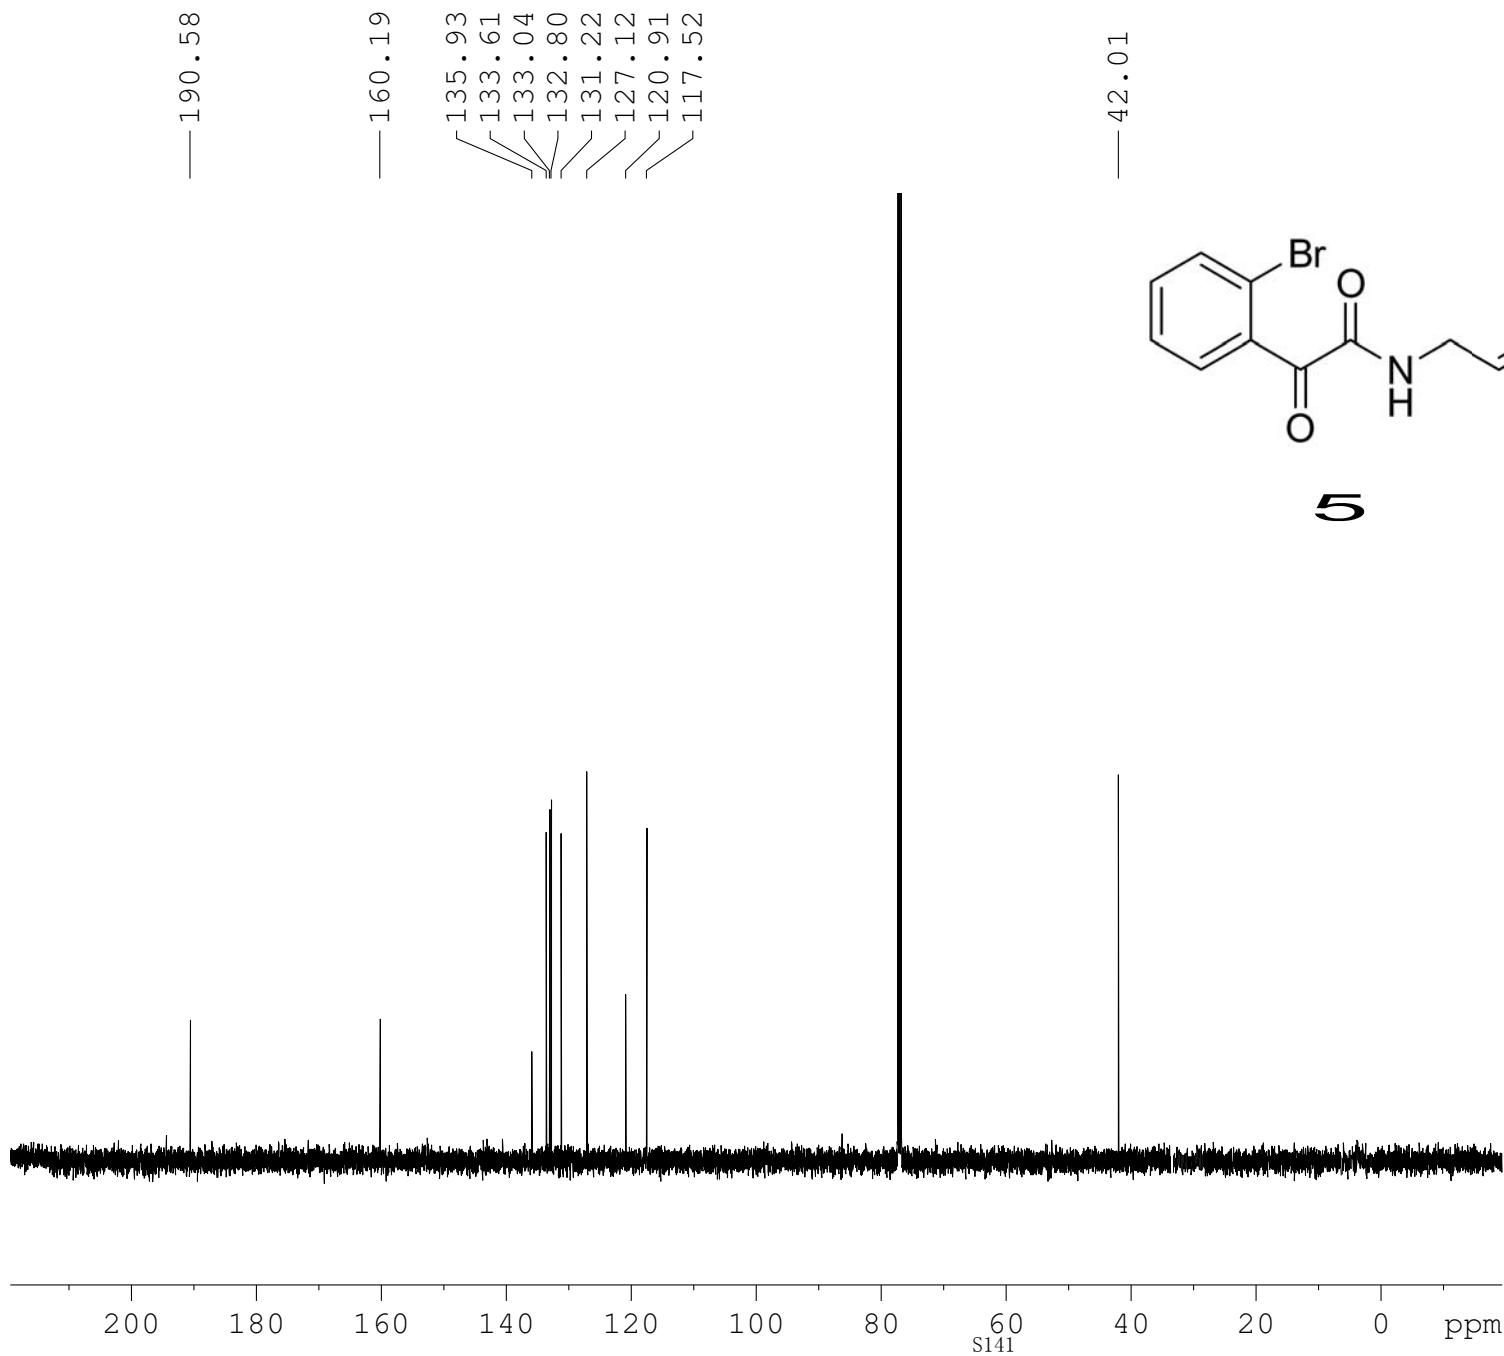

```
NAME          xb20120525
EXPNO         3
PROCNO        1
Date_         20120525
Time          9.51
INSTRUM       spect
PROBHD        5 mm PATXO 19F
PULPROG       zgpg30
TD            65536
SOLVENT       CDC13
NS            128
DS            4
SWH           30030.029 Hz
FIDRES        0.458222 Hz
AQ            1.0912410 sec
RG            128
DW            16.650 usec
DE            6.00 usec
TE            295.4 K
D1            2.00000000 sec
d11           0.03000000 sec
DELTA         1.89999998 sec
TD0           1

===== CHANNEL f1 =====
NUC1           13C
P1             9.50 usec
PL1            -0.50 dB
SFO1          125.7703643 MHz

===== CHANNEL f2 =====
CPDPRG2       waltz16
NUC2           1H
PCPD2         80.00 usec
PL2            1.00 dB
PL12          16.31 dB
PL13          16.50 dB
SFO2          500.1320005 MHz
SI            32768
SF            125.7577890 MHz
WDW           EM
SSB           0
LB            1.00 Hz
GB            0
PC            1.40
```

8.860  
7.709  
7.693  
7.686  
7.671  
7.657  
7.655  
7.452  
7.439  
7.438  
7.425  
7.421  
7.416  
7.405  
7.401  
7.391  
7.376  
7.217  
7.202  
7.187

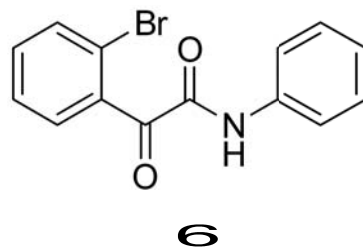

SUNJ-3-116  
PROTON CDC13 D:\\ deng 49

NAME XB20120815  
EXPNO 1  
PROCNO 1  
Date\_ 20120815  
Time 10.39  
INSTRUM spect  
PROBHD 5 mm PATXO 19F  
PULPROG zg30  
TD 65536  
SOLVENT CDC13  
NS 8  
DS 2  
SWH 10330.578 Hz  
FIDRES 0.157632 Hz  
AQ 3.1720407 sec  
RG 143.7  
DW 48.400 usec  
DE 6.00 usec  
TE 295.6 K  
D1 1.00000000 sec  
TD0 1

===== CHANNEL f1 =====  
NUC1 1H  
P1 13.72 usec  
PL1 1.00 dB  
SFO1 500.1330885 MHz  
SI 32768  
SF 500.1300128 MHz  
WDW no  
SSB 0  
LB 0.00 Hz  
GB 0  
PC 1.00

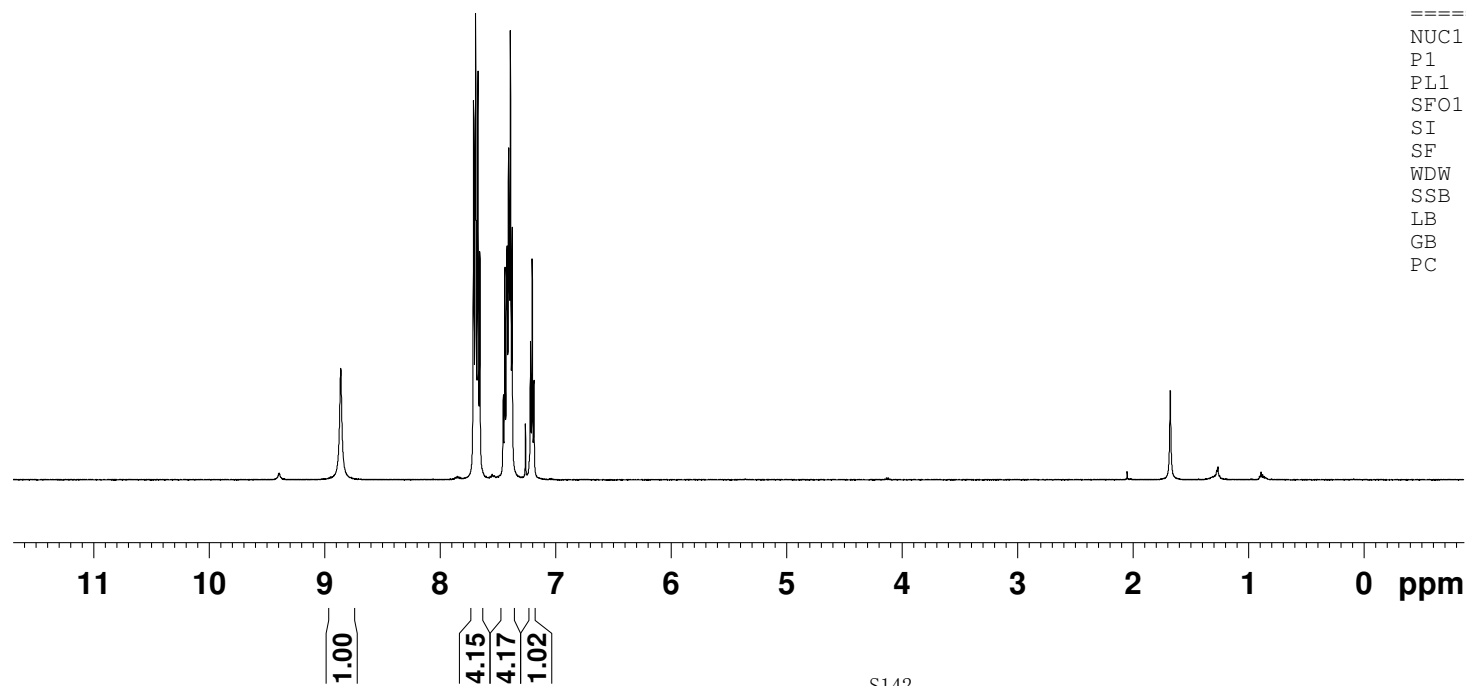

SUNJ-3-116  
C13CPD CDC13 D:\ deng 49

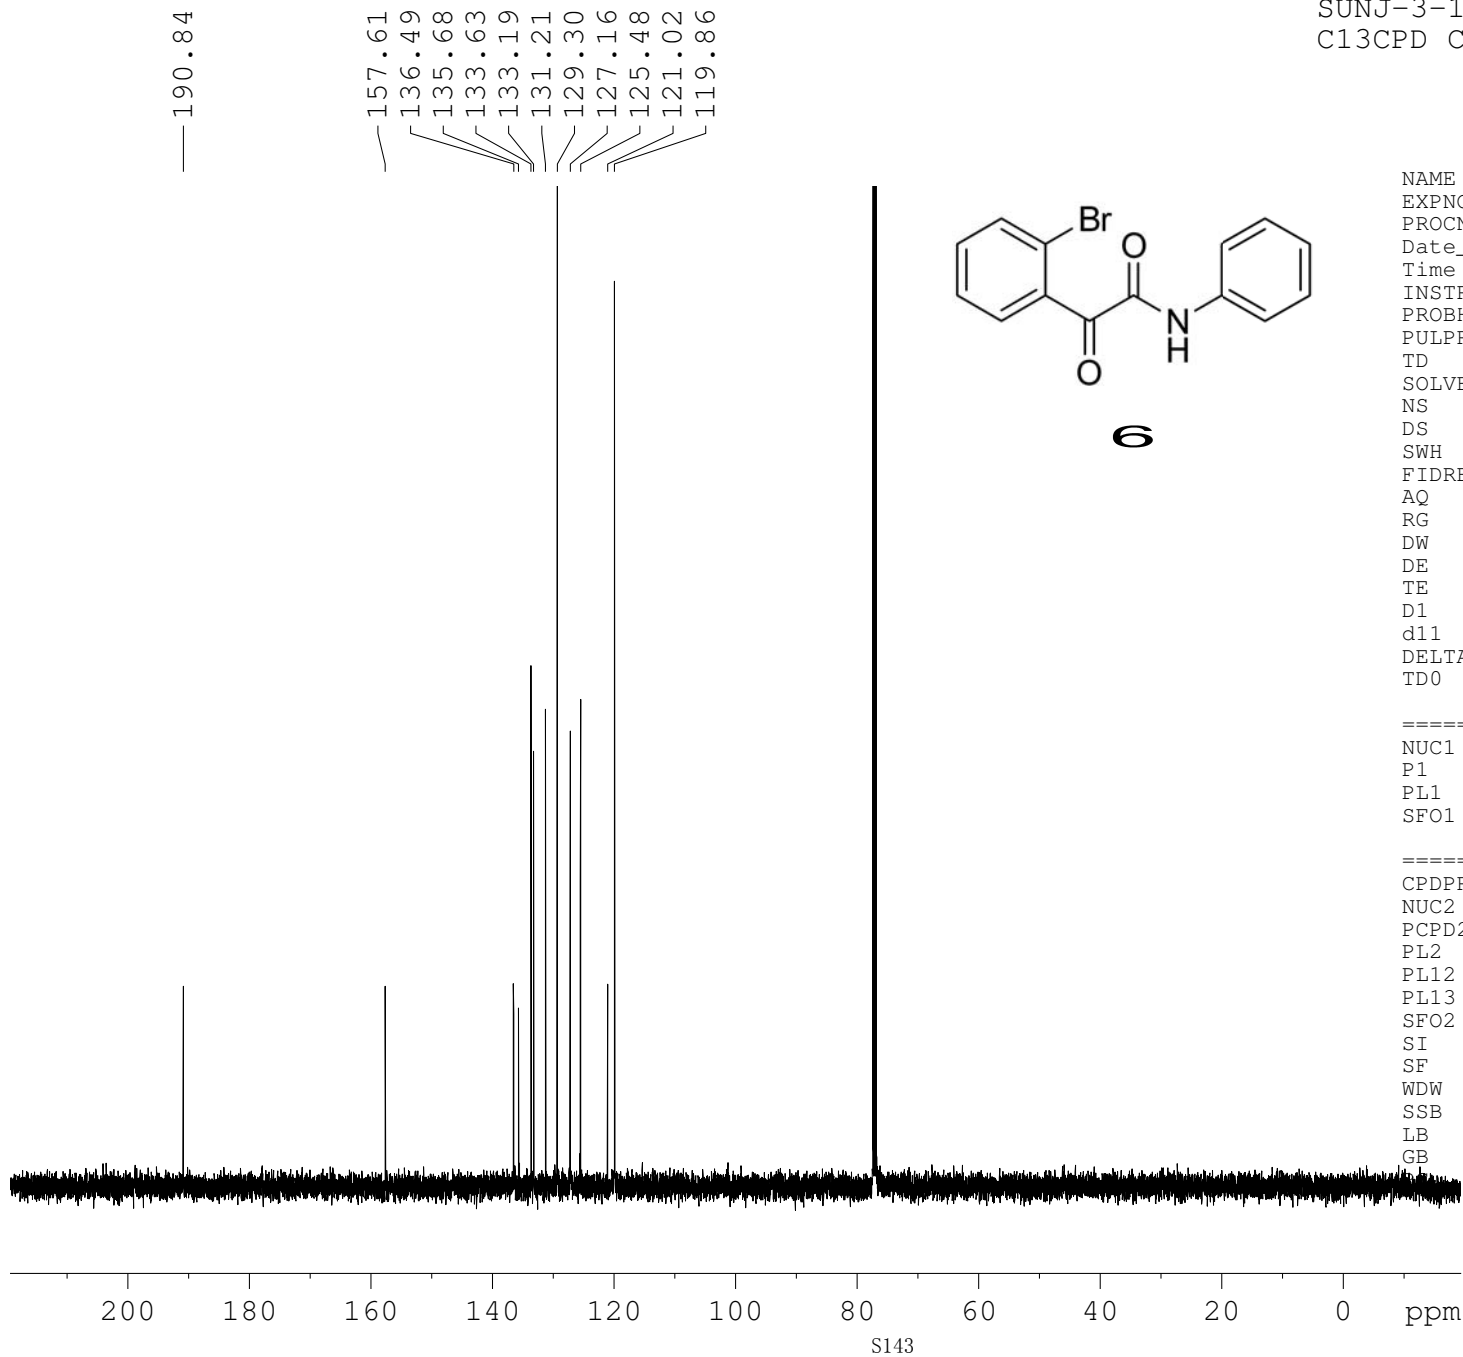

NAME XB20120815  
EXPNO 3  
PROCNO 1  
Date\_ 20120815  
Time 10.48  
INSTRUM spect  
PROBHD 5 mm PATXO 19F  
PULPROG zgpg30  
TD 65536  
SOLVENT CDC13  
NS 128  
DS 4  
SWH 30030.029 Hz  
FIDRES 0.458222 Hz  
AQ 1.0912410 sec  
RG 128  
DW 16.650 usec  
DE 6.00 usec  
TE 296.9 K  
D1 2.00000000 sec  
d11 0.03000000 sec  
DELTA 1.89999998 sec  
TD0 1

=====  
CHANNEL f1  
NUC1 13C  
P1 9.50 usec  
PL1 -0.50 dB  
SFO1 125.7703643 MHz

=====  
CHANNEL f2  
CPDPRG2 waltz16  
NUC2 1H  
PCPD2 80.00 usec  
PL2 1.00 dB  
PL12 16.31 dB  
PL13 16.50 dB  
SFO2 500.1320005 MHz  
SI 32768  
SF 125.7577890 MHz  
WDW EM  
SSB 0  
LB 1.00 Hz  
GB 0  
1.40
